# Supplementary material
Source: publisher figshare collection journal article supplement (https://gsapubs.figshare.com/ndownloader/files/25794665)
Supplement: Supplementary file 1 [file 25794665]

	Analysis	Sample	Final207_235	Final207_235_Int2SE	Final207_235_Prop2SE	Final206_238	Final206_238_Int2SE	Final206_238_Prop2SE	Final207_206	Final207_206_Int2SE	Final207_206_Prop2SE	ErrorCorrelation_6_38vs7_35	ErrorCorrelation_38_6vs7_6	U238206_age	FinalAge206_238_Int2SE	FinalAge206_238_Prop2SE	U235207_age	FinalAge207_235_Int2SE	FinalAge207_235_Prop2SE	Pb207206_age	FinalAge207_206_Prop2SE	Selected_age	Age_2s_error	Th	U	Zr	P	Ti	La	Ce	Nd	Eu	Dy	Lu	Hf	Y	Pb206	Pb207	Pb208	Concordance
1	MW1_0	MW	3.99	0.19	0.23	0.2757	0.0091	0.0091	0.1047	0.0033	0.0055	0.69394	-0.021385	1567	46	46	1619	40	48	1689	98	1689	98	970	344	428000	635	27.8	3.5	81	172	41.2	417	89.1	11640	2970	350.4	42.1	27.9	y
2	MW1_10	MW	3.86	0.18	0.22	0.2685	0.0098	0.0098	0.1068	0.0034	0.0056	0.76482	0.15311	1530	50	50	1601	36	44	1725	97	1725	97	860	291.9	459000	480	12.2	0.69	27.8	31.6	16.5	231	53.4	11650	1760	289.1	34.7	21.07	n
3	MW1_12	MW	3.62	0.22	0.25	0.2587	0.0099	0.0099	0.1013	0.004	0.0058	0.73572	-0.15098	1481	51	51	1540	48	55	1638	110	1638	110	523	290	423000	590	32.8	2.31	76	110	24.9	425	88.6	10420	3150	270	31	26.3	y
4	MW1_13	MW	3.86	0.2	0.24	0.27	0.01	0.01	0.1055	0.0037	0.0058	0.77753	-0.24359	1537	51	51	1597	45	53	1698	100	1698	100	550	326	428000	648	28.3	1.77	54	88	21.8	336	81.3	11440	2480	325.4	38	24.39	y
5	MW1_15	MW	4.13	0.19	0.23	0.28	0.0077	0.0077	0.1071	0.0039	0.0059	0.61169	0.003649	1598	42	42	1650	38	46	1730	100	1730	100	181.3	289	444000	430	24.6	1.14	54.7	43.3	10.77	233	59.2	10950	1850	302.9	36.1	26.3	y
6	MW1_17	MW	4.32	0.2	0.24	0.2945	0.0079	0.0079	0.1075	0.0045	0.0064	0.46083	0.11381	1662	39	39	1684	38	47	1736	100	1736	100	459	157.5	430000	1060	16.7	14.7	58.1	50.8	8.06	166.4	61.2	9120	1511	173.1	20.7	26.8	y
7	MW1_19	MW	4.09	0.19	0.23	0.2816	0.0071	0.0071	0.1059	0.0041	0.0061	0.54983	-0.021994	1598	36	36	1639	38	46	1699	100	1699	100	389	137.4	467000	257	18.7	0.502	20.8	29.6	6.76	151.8	56.3	9760	1331	145.9	17.05	18.16	y
8	MW1_2	MW	4.66	0.2	0.26	0.32	0.0091	0.0091	0.1064	0.0035	0.0057	0.6675	-0.065342	1787	44	44	1748	37	47	1715	100	1715	100	93.4	179.3	433000	167	9.6	-0.0025	10.39	1.07	0.315	65.2	40	9610	726	215	26.1	15.67	y
9	MW1_20	MW	4.48	0.21	0.25	0.3068	0.008	0.008	0.1063	0.0039	0.0059	0.59519	-0.015604	1723	39	39	1715	38	47	1709	100	1709	100	86.8	129.2	468000	329	14.3	-0.0027	9.29	1.62	0.41	77.5	48.5	11000	900	147.2	17.29	13.58	y
10	MW1_24	MW	4.12	0.17	0.21	0.2755	0.007	0.007	0.1088	0.0033	0.0056	0.64484	-0.00062199	1567	36	36	1649	33	43	1758	100	1758	100	376	286.7	443000	575	30.1	1.53	62.4	70.8	16.6	264	62.8	10410	2030	293.1	35.1	25.6	n
11	MW1_25	MW	4.08	0.23	0.26	0.274	0.011	0.011	0.1086	0.0048	0.0066	0.66405	0.13907	1558	56	56	1639	46	53	1748	120	1748	120	910	257.6	455000	400	24.3	1.98	59	85	18.2	270	59.3	10970	1960	255.8	30.5	23.2	n
12	MW1_29	MW	4.63	0.18	0.24	0.3093	0.0065	0.0065	0.1097	0.004	0.0061	0.52121	0.020414	1736	32	32	1751	35	46	1781	97	1781	97	104.6	156.2	458000	89	7.3	0.012	15.86	2.4	0.78	57.1	39.2	11340	678	180.5	21.7	14.85	y
13	MW1_30	MW	3.37	0.21	0.24	0.222	0.0088	0.0088	0.1119	0.0042	0.0063	0.78344	0.12061	1290	47	47	1485	48	54	1831	100	1831	100	1096	199.1	455000	308	21.6	1.54	41.1	87.6	19.2	209	44.6	9990	1451	164.6	20.15	17.11	n
14	MW1_32	MW	4.47	0.17	0.22	0.2975	0.0078	0.0078	0.109	0.0033	0.0056	0.60832	0.054789	1677	39	39	1716	32	42	1764	94	1764	94	422	300.7	439000	617	26.8	2.02	59.7	114	26.5	308	79	11370	2360	333.6	39.5	29.6	y
15	MW1_33	MW	4.21	0.18	0.23	0.2786	0.0071	0.0071	0.1098	0.0039	0.006	0.5118	0.12065	1583	36	36	1666	34	43	1770	100	1770	100	661	162.2	447000	234	16.8	0.78	44.8	47.8	11.71	170.8	60.5	9880	1423	168.9	20.03	24.81	n
16	MW1_34	MW	4.54	0.19	0.24	0.304	0.0073	0.0073	0.1074	0.0035	0.0057	0.58699	0.040825	1709	36	36	1727	35	44	1744	100	1744	100	272	190.6	446000	307	10.3	0.203	12.36	12.4	2.79	107.2	54.7	11170	1099	218.2	25.3	17.37	y
17	MW1_35	MW	4.24	0.2	0.24	0.2759	0.0075	0.0075	0.1122	0.0044	0.0064	0.59829	-0.026946	1569	38	38	1675	40	49	1804	100	1804	100	437	161.3	464000	677	16.8	0.467	29.7	28.3	7.61	189	102.5	10570	1873	167.1	20.2	19.11	n
18	MW1_36	MW	4.68	0.18	0.23	0.3	0.0076	0.0076	0.113	0.0034	0.0058	0.63618	0.02253	1689	38	38	1756	32	42	1831	92	1831	92	453	280.7	446000	319	13.7	1.11	37.1	59.6	12.78	323.4	127.8	9510	3060	315.1	38.4	46.6	y
19	MW1_37	MW	3.94	0.17	0.22	0.2565	0.0069	0.0069	0.1111	0.0038	0.006	0.62573	-0.034057	1470	35	35	1611	36	45	1793	100	1793	100	965	226.3	448000	277	16.9	1.28	62.4	64.5	17.8	238	85.8	9870	1922	215.8	26	32.6	n
20	MW1_39	MW	4.57	0.17	0.22	0.3015	0.0075	0.0075	0.1095	0.003	0.0055	0.6723	0.012297	1697	37	37	1735	31	41	1775	92	1775	92	149.4	271.4	466000	381	13.7	0.389	20.2	16.3	4.27	117.2	54.6	11940	1155	306.9	36.1	21.4	y
21	MW1_40	MW	4.63	0.18	0.24	0.3059	0.0066	0.0066	0.109	0.0034	0.0057	0.61672	-0.072598	1719	32	32	1745	33	42	1763	96	1763	96	125.1	225.6	462000	369	8.8	0.029	11.31	2.35	0.51	73.5	51.5	12020	904	260.1	30.4	17.43	y
22	MW1_41	MW	4.11	0.14	0.2	0.2719	0.0069	0.0069	0.1094	0.0033	0.0056	0.57824	0.19092	1549	35	35	1650	29	40	1770	94	1770	94	613	310	448000	603	19.4	1.12	33.9	64.3	15.3	241	77.8	11520	1930	316.6	37.1	24.25	n
23	MW1_42	MW	4.54	0.15	0.21	0.3018	0.0062	0.0062	0.1086	0.0032	0.0056	0.51868	0.14382	1699	31	31	1732	28	39	1769	88	1769	88	338	275.5	453000	459	10.2	0.423	21.1	22.5	5.16	132.9	64.5	12150	1297	313.8	36.7	26.1	y
24	MW1_43	MW	4.31	0.17	0.22	0.2908	0.0074	0.0074	0.1071	0.0036	0.0058	0.54693	0.13862	1644	37	37	1687	33	42	1729	98	1729	98	298	166.4	451000	255	16.5	0.342	22.15	22.7	5.81	121.9	52.2	9800	1113	181.8	20.93	17.82	y
25	MW1_46	MW	3.45	0.17	0.21	0.2332	0.0099	0.0099	0.1068	0.0035	0.0057	0.78065	0.026632	1348	52	52	1502	41	49	1725	95	1725	95	801	442	425000	799	41.5	6.12	125.7	271	74	612	96	10920	4090	373.8	43	32	n
26	MW1_47	MW	4.76	0.23	0.27	0.3097	0.0086	0.0086	0.1116	0.0038	0.006	0.62625	-0.025329	1737	42	42	1773	38	46	1801	100	1801	100	144.8	141	448000	183	15.7	1.92	24.5	10.9	2.2	66.7	36.8	10600	685	165.2	19.78	17.19	y
27	MW1_49	MW	2.94	0.22	0.24	0.201	0.012	0.012	0.1056	0.0041	0.006	0.84436	0.033203	1175	66	66	1367	55	60	1695	110	1695	110	776	394	412000	1240	78.6	4.02	139.8	175	43.1	699	113.8	8520	4880	281.5	32.4	41.1	n
28	MW1_5	MW	4.11	0.17	0.22	0.2886	0.0081	0.0081	0.1043	0.003	0.0053	0.72227	-0.02949	1632	40	40	1647	33	43	1684	96	1684	96	527	263.4	441000	376	20.9	1.23	45.4	58.7	11.94	217.4	68.8	10010	1781	283.9	33.7	26.43	y
29	MW1_52	MW	4.7	0.18	0.24	0.3108	0.0066	0.0066	0.109	0.0035	0.0057	0.61183	-0.054939	1749	34	34	1758	33	43	1762	94	1762	94	149.1	259.1	461000	282	8.1	0.021	11	1.46	0.356	90	60.4	11590	1057	309.4	36.9	22.69	y
30	MW1_53	MW	4.63	0.22	0.26	0.3087	0.0078	0.0078	0.1087	0.0043	0.0063	0.52933	0.084588	1732	39	39	1742	39	48	1745	110	1745	110	67.8	113.3	468000	139	18.6	0.091	8.44	1.63	0.313	56.1	33.75	9510	632	133.9	15.95	10.95	y
31	MW1_56	MW	4.5	0.17	0.22	0.3037	0.0059	0.0059	0.1075	0.0033	0.0056	0.5663	-0.044019	1708	29	29	1723	31	41	1738	96	1738	96	188.8	264.8	450000	198	9.1	0.3	25.2	7.9	2.93	86.5	46.3	10910	887	307.4	36.4	26.31	y
32	MW1_6	MW	3.55	0.19	0.22	0.2521	0.0084	0.0084	0.1028	0.0038	0.0057	0.72405	-0.13506	1447	44	44	1523	43	50	1647	110	1647	110	498	339.8	454000	501	19.3	1.8	44.7	58.6	18.5	223	77.4	12090	1900	319.9	37.4	18.23	n
33	MW1_7	MW	4.4	0.17	0.22	0.3014	0.0081	0.0081	0.107	0.0031	0.0054	0.69182	-0.014105	1696	40	40	1703	33	43	1731	96	1731	96	420	226.9	449000	305	18.5	0.71	33.7	43.2	9.2	191.8	70.1	9030	1728	255.1	31	33.5	y
34	MW1_8	MW	4.42	0.18	0.23	0.3069	0.0082	0.0082	0.105	0.0031	0.0054	0.65006	0.017912	1723	41	41	1707	33	43	1707	98	1707	98	171.8	302.7	449000	426	11.2	0.41	18.4	23.5	4.16	113.8	65.7	11660	1217	347.2	41.7	26.3	y
35	MW1_9	MW	2.96	0.17	0.2	0.2034	0.0082	0.0082	0.1074	0.0037	0.0058	0.80323	-0.029445	1191	44	44	1381	45	52	1731	100	1731	100	1310	309.8	463000	290	34.3	1.9	53.2	101.3	21.2	360	81.6	10890	2680	232.1	28.2	26.1	n
36	MW3_0	MW	5.06	0.21	0.27	0.2774	0.0092	0.0092	0.1343	0.0054	0.0078	0.45627	0.29307	1575	47	47	1819	34	43	2138	110	2138	110	608	267	452000	271	13.9	0.76	36.6	41.1	9.5	206	76.1	9960	1769	281	42.2	46	n
37	MW3_1	MW	3.44	0.19	0.22	0.2383	0.0069	0.0069	0.1052	0.0052	0.0068	0.49251	0.0027991	1376	36	36	1498	45	52	1668	120	1668	120	1152	136.7	465000	380	16.6	1.6	49.4	68.5	14.8	207	55.6	10800	1535	125.2	14.54	17.36	n
38	MW3_12	MW	4.13	0.18	0.23	0.2837	0.0077	0.0077	0.1055	0.0036	0.0057	0.64416	-0.005885	1608	39	39	1648	36	45	1698	100	1698	100	282	178.9	469000	354	11.6	0.217	11.4	12.5	2.89	105.6	58.9	11480	1127	195.5	22.16	15.45	y
39	MW3_15	MW	3.84	0.19	0.22	0.2583	0.0079	0.0079	0.1078	0.0042	0.0061	0.58616	0.022402	1479	41	41	1587	39	47	1732	100	1732	100	428	276	463000	676	22.4	0.9	39.1	45.1	14.4	228	76.3	11030	1910	270	31	25.3	n
40	MW3_16	MW	4.8	0.21	0.26	0.3065	0.0084	0.0084	0.1136	0.004	0.0062	0.61039	0.031885	1721	41	41	1781	35	43	1833	99	1833	99	103	133.1	463000	183	13.7	0.028	14.36	1.91	0.77	78.7	48.3	9670	892	156.6	19.05	16.08	y
41	MW3_17	MW	3.9	0.16	0.21	0.2566	0.007	0.007	0.1102	0.0035	0.0058	0.63891	0.057268	1471	36	36	1604	34	43	1793	93	1793	93	742	305.2	465000	796	19.4	1.72	50.5	73	19	297	103.7	11400	2590	299.9	35.4	29.3	n
42	MW3_18	MW	2.97	0.13	0.16	0.2014	0.0061	0.0061	0.1079	0.0037	0.0059	0.66175	-0.0096285	1182	32	32	1397	35	43	1739	100	1739	100	1530	466	421000	1340	81.5	6.6	161	312	76.7	1024	153.7	9420	7130	358.6	41.4	35.6	n
43	MW3_19	MW	4.55	0.2	0.25	0.3007	0.0077	0.0077	0.1095	0.0038	0.0059	0.65852	-0.038388	1693	38	38	1729	37	45	1768	97	1768	97	150.6	194.9	455000	185	12.2	0.144	20.41	9.2	2.13	81.6	44.6	10070	837	224.9	26.2	20.17	y
44	MW3_2	MW	4.41	0.2	0.24	0.3039	0.0083	0.0083	0.1057	0.0041	0.006	0.50126	0.11167	1708	41	41	1702	37	46	1696	110	1696	110	70.3	138.4	476000	311	9.6	-0.00484	6.84	0.89	0.232	65.6	45.9	11520	787	161	18.82	11.09	y
45	MW3_20	MW	4.27	0.19	0.23	0.2697	0.0082	0.0082	0.1141	0.0037	0.006	0.62365	0.084532	1537	42	42	1677	36	44	1856	100	1856	100	569	236.8	453000	559	25.8	3.44	117	229	57.8	490	100.2	9510	3520	243.9	29.4	32.7	n
46	MW3_21	MW	4.48	0.21	0.25	0.2927	0.0084	0.0084	0.111	0.0041	0.0062	0.58872	0.074955	1653	42	42	1715	38	46	1789	100	1789	100	203	219.9	474000	142	10.9	0.091	19.84	7.4	2.15	74.6	42.4	11230	802	248.7	29.2	19.26	y
47	MW3_22	MW	4.28	0.17	0.22	0.2773	0.0068	0.0068	0.1119	0.0037	0.006	0.52111	0.08205	1576	34	34	1687	33	43	1810	95	1810	95	336	331.2	432000	666	37.1	3.78	85.5	124	29.9	402	74	10360	2920	351.2	41.5	27.6	n
48	MW3_24	MW	3.64	0.16	0.2	0.234	0.0062	0.0062	0.1126	0.004	0.0062	0.52607	0.10052	1354	32	32	1548	34	42	1829	98	1829	98	1067	249.5	475000	303	25.2	2	26.8	54.4	10.91	181.3	49.2	10180	1397	223.5	26.7	17.83	n
49	MW3_25	MW	3.94	0.17	0.21	0.2506	0.0061	0.0061	0.1136	0.004	0.0062	0.59518	0.038045	1440	31	31	1612	35	44	1834	97	1834	97	668	387	451000	840	47.2	3.62	90.6	143.9	31.3	463	90.3	11260	3380	368	44.5	33.9	n
50	MW3_28	MW	4.64	0.17	0.23	0.3019	0.0074	0.0074	0.1112	0.0034	0.0058	0.54442	0.13385	1699	36	36	1749	31	42	1800	96	1800	96	71.3	159.8	456000	289	9.6	0.0071	3.78	1.28	0.282	66.6	44.6	10230	750	184.4	21.71	10.94	y
51	MW3_3	MW	4	0.15	0.2	0.2617	0.008	0.008	0.1112	0.0029	0.0055	0.71724	0.053852	1496	41	41	1632	29	38	1805	93	1805	93	738	352.6	453000	502	25.2	1.82	57.1	97.2	23.9	358	86.1	10960	2680	355.4	43.7	32.3	n
52	MW3_30	MW	3.89	0.22	0.26	0.2587	0.0071	0.0071	0.1078	0.0048	0.0066	0.61707	-0.17219	1482	36	36	1593	47	54	1739	110	1739	110	533	153.2	416000	220	9.5	0.629	22.7	29.9	6.75	104.8	39	9820	897	151.3	17.6	12.84	n
53	MW3_31	MW	4.65	0.23	0.28	0.3	0.0086	0.0086	0.1115	0.0045	0.0065	0.60089	-0.02923	1689	43	43	1743	42	50	1792	110	1792	110	102.7	197.9	474000	1410	14.1	0.55	6.77	7.1	1	87.9	54.6	11340	966	228.4	27.3	13.35	y
54	MW3_32	MW	3.43	0.43	0.45	0.193	0.011	0.011	0.1214	0.0086	0.01	0.82315	-0.54558	1135	58	58	1459	86	89	1940	140	1940	140	2160	407	464000	841	50.7	4.13	138	211	49.4	676	125.3	10390	4750	293	38.5	39.6	n
55	MW3_34	MW	4.2	0.19	0.23	0.2711	0.0075	0.0075	0.1119	0.0045	0.0065	0.44608	0.17187	1544	38	38	1663	37	45	1799	110	1799	110	497	236.1	448000	190	37.5	0.76	23.2	40.4	9.7	110	31.7	12180	800	248.2	29.6	14.29	n
56	MW3_37	MW	2.42	0.19	0.2	0.161	0.01	0.01	0.1065	0.0031	0.0055	0.92525	-0.16243	958	57	57	1221	55	60	1731	100	1731	100	2010	502	452000	1340	82.7	6.41	166	312	77.5	1000	148	8820	6640	296.1	34.3	36.3	n
57	MW3_38	MW	4.19	0.16	0.21	0.2791	0.0074	0.0074	0.1079	0.0032	0.0055	0.6639	0.042375	1585	37	37	1663	32	41	1746	95	1746	95	386	210.9	477000	202	12.5	0.459	27.3	26	6.87	116.4	46.1	10790	1026	226.7	26.42	20.37	y
58	MW3_39	MW	4.46	0.22	0.26	0.2913	0.0084	0.0084	0.1098	0.0039	0.0061	0.69886	-0.20742	1646	42	42	1710	41	50	1770	100	1770	100	214	217.1	455000	271	14.6	0.63	30.4	32.3	8.4	150	64	9940	1353	243.3	28.9	22.8	y
59	MW3_4	MW	4.39	0.18	0.23	0.3007	0.0079	0.0079	0.1066	0.0039	0.006	0.49962	0.20315	1693	39	39	1701	34	44	1714	100	1714	100	75.7	124.5	477000	84	11.8	-0.001	12.53	0.95	0.358	46.4	32.5	10400	574	144.1	16.91	12.08	y
60	MW3_41	MW	2.88	0.38	0.39	0.1594	0.0092	0.0092	0.128	0.015	0.016	0.38162	0.14313	951	51	51	1300	110	110	1840	290	1840	290	204	26.3	479000	341	107	1.49	17.3	13.8	4.06	52.6	23.36	8090	530	16.45	2.26	3.73	n
61	MW3_46	MW	3.22	0.16	0.19	0.216	0.007	0.007	0.1072	0.0034	0.0056	0.7597	-0.27331	1259	37	37	1456	41	49	1731	97	1731	97	2230	355	422000	994	44.5	6.85	176	340	75.4	707	123.7	10280	4860	295.7	34.4	41.9	n
62	MW3_47	MW	4.17	0.2	0.24	0.2734	0.0068	0.0068	0.1099	0.0045	0.0065	0.5183	0.043771	1557	34	34	1654	38	47	1763	110	1763	110	367	135.1	474000	229	16.4	0.289	18.96	20.9	4.99	119.6	46.9	9680	1056	144	17.12	15.41	n
63	MW3_48	MW	4.33	0.18	0.23	0.2982	0.0069	0.0069	0.1047	0.0034	0.0055	0.58509	-0.05118	1681	34	34	1690	34	43	1686	100	1686	100	175.1	132.2	475000	204	16.1	0.032	39.7	4.54	1.62	83.2	49.7	9970	906	153.7	17.3	24.83	y
64	MW3_49	MW	4.43	0.22	0.26	0.3005	0.0082	0.0082	0.1075	0.0046	0.0065	0.55156	-0.078177	1691	41	41	1712	43	51	1721	110	1721	110	80.2	110.6	469000	103	12.9	0	13.84	1.07	0.5	50.5	32.2	10140	597	130.2	14.98	12.02	y
65	MW3_5	MW	2.95	0.15	0.18	0.2081	0.0077	0.0077	0.103	0.0037	0.0057	0.71936	-0.02678	1216	41	41	1381	41	48	1649	110	1649	110	1090	395	417000	718	38.5	7.66	258	306	69.8	673	116.9	8600	4690	313.6	35.6	41.5	n
66	MW3_50	MW	3.88	0.14	0.19	0.2761	0.0063	0.0063	0.1017	0.0033	0.0054	0.47961	0.15133	1570	32	32	1601	29	39	1634	98	1634	98	152.1	210.5	470000	150	8.5	0.019	19.08	1.6	0.54	67.2	46.4	11540	797	227.2	24.96	19.57	y
67	MW3_52	MW	3.36	0.24	0.27	0.222	0.014	0.014	0.1094	0.0034	0.0057	0.89504	-0.088104	1283	75	75	1488	55	60	1768	99	1768	99	1510	304	468000	623	30.7	2.25	100.3	114	25.6	393	88.7	10680	2990	259.6	30.5	36.6	n
68	MW3_53	MW	4.68	0.22	0.27	0.3119	0.0073	0.0073	0.1089	0.0049	0.0067	0.40033	0.10801	1748	36	36	1750	41	49	1741	110	1741	110	48.5	76.1	471000	124	13.4	-0.0019	10.25	0.65	0.281	35.7	24.9	10340	445	93	11	7.68	y
69	MW3_54	MW	4.56	0.16	0.22	0.3029	0.0063	0.0063	0.1085	0.0032	0.0055	0.52193	0.09261	1704	31	31	1735	30	40	1768	98	1768	98	203.9	243	460000	302	9	0.098	12.15	7.26	1.64	88.5	59.6	11760	1021	288.8	34.1	20.24	y
70	MW3_55	MW	4.37	0.15	0.21	0.2938	0.0066	0.0066	0.1089	0.0037	0.0059	0.42663	0.19361	1659	33	33	1706	30	42	1760	97	1760	97	272	179.3	472000	254	13.4	0.211	16.7	14.1	3.4	132.4	64.3	9840	1331	207.2	24.4	22.8	y
71	MW3_7	MW	3.17	0.15	0.19	0.2124	0.0085	0.0085	0.1095	0.0034	0.0057	0.80448	0.0085406	1239	45	45	1444	39	47	1784	90	1784	90	1600	287	465000	488	29.9	2.56	63.9	122	27.5	335	72	10020	2450	231.7	27.9	23.2	n
72	MW3_8	MW	3.99	0.18	0.22	0.2635	0.007	0.007	0.1102	0.0046	0.0065	0.46975	0.1147	1506	35	35	1620	37	45	1770	100	1770	100	605	134.8	450000	159	11.6	0.89	26.1	42.4	10.85	126.1	33.5	10860	921	137.2	16.45	11.59	n
73	MW3_9	MW	4.52	0.22	0.27	0.3076	0.0086	0.0086	0.1067	0.0042	0.0062	0.56093	0.0099004	1727	42	42	1720	41	49	1710	110	1710	110	104.3	132.6	469000	364	13.9	0.0004	10.61	2.82	0.94	97.3	57.3	9590	1062	157.4	18.45	16.68	y
74	Output_1_0	ORD	4.03	0.18	0.47	0.2791	0.0055	0.0087	0.1	0.0041	0.0097	0.24151	0.14333	1585	28	44	1633	37	94	1581	190	1581	190	93	88.7	4.61E+05	121	15	0	40.1	1.08	0.75	31.1	20.78	9420	414	94.9	10.51	14.09	y
75	Output_1_1	ORD	4	0.15	0.46	0.2722	0.0056	0.0086	0.1014	0.004	0.0098	0.22328	0.29766	1551	28	43	1625	31	93	1624	180	1624	180	163.6	198.6	4.62E+05	246	7.7	0.77	79.7	17.9	4.65	157.8	65.5	8530	1508	210.2	23.5	23.17	y
76	Output_1_10	ORD	4.9	0.21	0.57	0.3219	0.0068	0.01	0.1092	0.0046	0.011	0.29531	0.18827	1797	33	50	1796	37	100	1759	170	1759	170	100.2	192.3	4.67E+05	785	16.3	0.258	8.04	3.66	1.24	169.2	113.9	10960	1910	235	28.2	14.61	y
77	Output_1_100	ORD	4.85	0.27	0.59	0.3132	0.0064	0.0099	0.1097	0.0062	0.011	0.26733	0.070431	1755	31	48	1779	48	100	1730	190	1730	190	71.3	178.6	4.88E+05	374	6.1	0	4.27	0.63	0.122	76.1	57.8	12170	1018	210	25.8	10.9	y
78	Output_1_101	ORD	5.81	0.31	0.7	0.3497	0.0071	0.011	0.1157	0.0053	0.011	0.47969	-0.044961	1931	34	53	1928	44	100	1845	170	1845	170	70.1	305	4.64E+05	320	14.2	2	16.6	19.4	5.36	38.8	6.43	9760	409	403	51.4	11.3	y
79	Output_1_102	ORD	4.07	0.21	0.49	0.2864	0.0054	0.0088	0.0996	0.0052	0.01	0.17617	0.22947	1622	27	44	1631	41	94	1556	180	1556	180	91.6	131.9	4.93E+05	224	13.4	0.0027	13.51	0.95	0.351	57.2	36.8	10400	712	142.4	15.57	13.45	y
80	Output_1_103	ORD	4.9	0.27	0.59	0.3136	0.0062	0.0098	0.1095	0.0053	0.011	0.50424	-0.14669	1757	30	48	1790	46	100	1753	180	1753	180	255	192.4	4.74E+05	244	12.8	0.46	22.6	11.8	3.78	103.5	56.2	9520	1134	227	27.7	25.5	y
81	Output_1_104	ORD	4	0.2	0.47	0.2727	0.0059	0.0088	0.102	0.0046	0.01	0.39945	0.13211	1553	30	45	1618	40	94	1626	190	1626	190	183.8	291	4.81E+05	539	16.6	2.66	97.8	44.9	11.8	125.1	44.6	11560	1208	294	33.7	22.1	y
82	Output_1_105	ORD	3.65	0.21	0.45	0.2694	0.0055	0.0085	0.0947	0.0051	0.0097	0.37	-0.030351	1537	28	43	1540	45	94	1460	190	1537	43	303	309	4.65E+05	539	5.7	1.2	55.9	20.1	4.88	163.6	91	10980	1770	315	33	38.2	y
83	Output_1_106	ORD	1.51	0.1	0.19	0.1545	0.0037	0.0052	0.0682	0.0042	0.0073	0.33429	0.055715	925	21	29	918	42	79	820	230	925	29	89.4	148.3	4.92E+05	120	13.7	0	11.93	3.56	1.81	68.8	51.3	9450	906	85.1	6.54	7.43	y
84	Output_1_107	ORD	2.36	0.14	0.29	0.2011	0.0049	0.0069	0.0823	0.0044	0.0084	0.47256	-0.090825	1180	26	37	1211	42	85	1180	200	1180	37	468	438	4.67E+05	750	28.7	3.04	92	59	19.6	282	99.2	11010	2470	324	29.5	38.2	y
85	Output_1_108	ORD	3.85	0.21	0.46	0.2811	0.0054	0.0087	0.0964	0.0045	0.0096	0.44066	-0.053954	1596	27	44	1587	41	92	1508	180	1508	180	206.7	259	4.88E+05	660	12.5	11.5	67	19.4	0.67	93.9	69.4	11190	1170	273	29.1	29.9	y
86	Output_1_109	ORD	1.577	0.099	0.2	0.1491	0.0055	0.0065	0.0759	0.0043	0.0079	0.4072	0.13314	895	31	37	952	37	74	1040	200	895	37	270	920	4.74E+05	1010	7.9	6.3	268	81	20.1	288	52.4	13270	2480	523	43.5	15.6	y
87	Output_1_11	ORD	3.75	0.22	0.46	0.2715	0.0056	0.0086	0.0978	0.0048	0.0099	0.45067	-0.10484	1547	28	44	1561	46	97	1553	190	1553	190	103.2	136.2	4.84E+05	227	17.1	0	20.1	0.65	0.4	69.3	52.5	10510	881	139.8	15.3	14.71	y
88	Output_1_110	ORD	1.96	0.16	0.26	0.195	0.0056	0.0073	0.0727	0.0058	0.0086	0.27719	0.026614	1147	30	39	1091	57	95	870	250	1147	39	69.6	85.8	4.93E+05	202	16.6	0	32.5	0.63	0.242	53.9	49.3	11980	724	61	5.02	6.98	n
89	Output_1_111	ORD	5.99	0.31	0.72	0.3585	0.0066	0.011	0.1184	0.0055	0.012	0.4304	-0.075618	1973	31	51	1955	43	99	1888	170	1888	170	30.3	202	4.76E+05	251	10.4	0.059	3.4	1.88	0.3	51.7	4.38	12870	422	269	35.3	4.95	y
90	Output_1_112	ORD	3.89	0.25	0.49	0.2785	0.0061	0.0091	0.1004	0.0064	0.011	0.32071	0.050474	1588	32	48	1594	52	100	1540	200	1540	200	76.2	104.9	4.79E+05	342	13.4	0.41	14.51	1.9	0.63	68.2	48.9	10160	869	109	12.15	10.23	y
91	Output_1_113	ORD	10.66	0.52	1.3	0.4761	0.0092	0.015	0.158	0.0065	0.015	0.47537	-0.043153	2508	40	64	2475	44	110	2412	170	2412	170	123.5	270	4.80E+05	212	27.5	0.009	1.43	1.98	0.083	29	2.05	12510	260	473	83.7	27.3	y
92	Output_1_114	ORD	4.65	0.27	0.57	0.3206	0.0066	0.01	0.1022	0.0049	0.01	0.47099	-0.089543	1791	32	49	1737	47	99	1641	190	1641	190	175.9	170.9	4.76E+05	203	13.7	0.171	18.2	7.05	1.73	96.5	43.8	9110	1019	201	23.3	21.1	y
93	Output_1_115	ORD	5.19	0.3	0.63	0.3235	0.0091	0.012	0.1147	0.0054	0.011	0.57986	-0.086259	1804	44	58	1829	48	100	1823	190	1823	190	154.6	160.1	4.23E+05	713	21.9	2.17	32.2	17.1	5.34	140	53.6	8610	1450	188	23.4	19.8	y
94	Output_1_116	ORD	4.09	0.22	0.49	0.2946	0.0074	0.01	0.0982	0.0039	0.0095	0.64582	-0.12921	1662	37	51	1634	42	96	1562	190	1562	190	261	193	4.59E+05	549	9.7	0.337	39.1	11.5	4	178	103.8	10420	1900	209	23	29.8	y
95	Output_1_117	ORD	3.61	0.21	0.44	0.2836	0.0061	0.0091	0.0927	0.0057	0.0099	0.25991	0.11676	1608	31	46	1538	48	100	1390	210	1608	46	94.2	88.7	4.90E+05	280	15.9	0.003	20.7	1.19	0.71	70.8	50.6	9640	922	92.1	9.38	13.35	n
96	Output_1_118	ORD	3.86	0.21	0.47	0.2824	0.0072	0.0099	0.0974	0.0044	0.0096	0.46364	0.049628	1601	36	50	1588	43	94	1539	190	1539	190	125.5	149.9	4.74E+05	340	19.2	0.071	21.5	2.62	0.67	98.2	65	10190	1173	154.2	16.7	17.77	y
97	Output_1_119	ORD	3.98	0.24	0.49	0.2976	0.007	0.01	0.0959	0.0053	0.01	0.37509	0.097418	1678	34	49	1608	48	99	1490	190	1678	49	90.3	106.7	4.60E+05	254	17.5	0.088	17	1.98	0.58	64	45.9	10100	842	116.6	12.22	12.71	n
98	Output_1_120	ORD	4.15	0.21	0.49	0.3006	0.006	0.0094	0.0992	0.0044	0.0098	0.43804	0.032544	1698	31	49	1649	40	95	1564	190	1564	190	226.3	320	4.53E+05	223	5.5	0.184	23.6	4.31	1.13	96.9	59.4	10840	1170	353	38.5	33.1	y
99	Output_1_121	ORD	4.08	0.22	0.49	0.2928	0.0065	0.0096	0.0995	0.0047	0.0099	0.38169	0.10121	1654	32	48	1633	43	95	1575	190	1575	190	108.4	145.3	4.77E+05	173	14.3	0.0019	10.81	1.23	0.56	69.9	40.3	10180	861	154.5	17.1	14.19	y
100	Output_1_122	ORD	3.71	0.19	0.44	0.2851	0.0052	0.0086	0.0945	0.0047	0.0095	0.3653	0.00057573	1616	26	43	1565	41	96	1463	180	1616	43	153.9	199	4.73E+05	238	11.2	0.047	31	1.19	0.395	60.9	49.9	11070	816	205.9	21.4	21.5	n
101	Output_1_123	ORD	4.53	0.26	0.55	0.3164	0.0075	0.011	0.1042	0.0055	0.011	0.45763	-0.044154	1770	37	52	1722	48	100	1640	180	1640	180	209.8	209	4.63E+05	259	9.3	0.341	20.8	10.5	2.98	93.8	36.7	10220	946	237	27.5	27.4	y
102	Output_1_124	ORD	3.9	0.25	0.49	0.2894	0.0066	0.0096	0.0983	0.006	0.011	0.35979	-0.021311	1637	33	48	1595	52	100	1500	200	1500	200	68	94.1	4.58E+05	227	154	1.08	14.4	2.3	0.357	51.2	40	9310	716	98.5	10.71	9.76	y
103	Output_1_125	ORD	4.92	0.26	0.59	0.3209	0.0068	0.01	0.1105	0.005	0.011	0.49792	-0.12237	1792	33	50	1788	42	96	1765	170	1765	170	173.5	395	4.67E+05	163	4.1	0	12.18	0.62	0.282	74.9	48.6	11290	923	455	56	28.1	y
104	Output_1_126	ORD	10.86	0.57	1.3	0.487	0.011	0.016	0.1609	0.0076	0.016	0.37891	0.11838	2556	48	70	2489	46	110	2423	160	2423	160	53	120.1	4.85E+05	144	11.4	0	7.47	1.91	0.55	46.6	23.55	7670	575	213	38	12.39	y
105	Output_1_127	ORD	3.98	0.24	0.49	0.2826	0.0059	0.009	0.1014	0.0055	0.01	0.46669	-0.106	1603	30	45	1607	48	97	1583	190	1583	190	116.5	126	4.73E+05	218	9.2	0.016	37.6	1.44	1.32	79.4	65.6	9350	1057	129.6	14.4	17	y
106	Output_1_128	ORD	3.71	0.2	0.45	0.2883	0.0071	0.0099	0.0939	0.0047	0.0095	0.49234	-0.012527	1631	35	49	1563	44	96	1448	180	1631	49	134.5	159.7	4.67E+05	231	13.4	0.077	26.8	3.37	1.59	77.4	53.2	9370	959	168.4	17.3	17.1	n
107	Output_1_129	ORD	4.65	0.25	0.56	0.313	0.0083	0.011	0.1072	0.0048	0.011	0.56443	-0.067218	1753	41	55	1740	44	97	1709	170	1709	170	253	302	4.37E+05	330	20.8	1.12	63.3	39	11.8	187	71.2	9990	1790	347	40.3	36.6	y
108	Output_1_13	ORD	1.9	0.11	0.23	0.1874	0.0044	0.0063	0.0734	0.0041	0.0076	0.2735	0.12184	1107	24	34	1071	40	84	960	220	1107	34	233.9	178.5	4.74E+05	129	13.6	0.016	61	1.83	0.98	54	29.8	9890	662	125.8	10.24	23.9	n
109	Output_1_130	ORD	3.9	0.24	0.48	0.2881	0.0069	0.0098	0.0971	0.0049	0.0098	0.56461	-0.16089	1630	34	49	1591	47	95	1511	190	1511	190	142.9	237	4.68E+05	185	8.2	0.04	26.9	1.42	0.384	66.9	54.1	10830	888	250	26.8	20.6	y
110	Output_1_131	ORD	3.7	0.22	0.46	0.278	0.0054	0.0086	0.0948	0.0051	0.0098	0.30181	-0.021733	1580	27	43	1550	46	94	1470	190	1580	43	106.5	138.1	4.80E+05	233	16.3	0.013	20.2	0.83	0.49	63	48.2	10270	867	140	14.8	14.88	y
111	Output_1_132	ORD	3.98	0.2	0.47	0.2858	0.0065	0.0095	0.1009	0.0048	0.01	0.46528	-0.054281	1619	32	47	1619	42	99	1590	180	1590	180	156.3	171.2	4.78E+05	193	10.7	0.121	24.4	3.55	1.4	70.3	38.6	10010	803	179	19.7	18.15	y
112	Output_1_133	ORD	4.48	0.24	0.54	0.3114	0.0068	0.01	0.1043	0.005	0.01	0.44663	-0.022695	1746	33	49	1715	44	100	1649	180	1649	180	129.3	187.7	4.80E+05	144	11.9	0	17.6	0.95	0.378	54.1	32.68	10070	697	212	23.8	20.32	y
113	Output_1_134	ORD	4.59	0.24	0.55	0.3088	0.0065	0.0099	0.1071	0.0053	0.011	0.34715	0.035447	1733	32	48	1730	43	98	1696	180	1696	180	89.8	176.2	4.84E+05	280	6.6	0	8.58	1.01	0.157	69.8	47.7	12050	867	201	23.4	13.94	y
114	Output_1_135	ORD	4.43	0.26	0.54	0.3068	0.0075	0.011	0.1035	0.0053	0.011	0.4705	-0.12862	1723	37	51	1695	47	99	1631	180	1631	180	63	119.3	4.97E+05	127	3.54	0.14	7.81	3.28	1.53	131.6	63.1	8760	1374	135	15.31	9.61	y
115	Output_1_136	ORD	4.3	0.29	0.54	0.2997	0.0074	0.01	0.103	0.0058	0.011	0.47828	-0.098578	1688	37	51	1674	53	100	1620	200	1620	200	173.6	170.7	4.62E+05	255	7.3	0.95	80.5	14	4.02	101.4	56.9	9980	1105	188	21.2	23.4	y
116	Output_1_137	ORD	3.79	0.22	0.46	0.2771	0.0059	0.0089	0.0971	0.0048	0.0098	0.34794	0.020076	1575	30	45	1579	42	90	1551	180	1551	180	73.3	111.4	5.00E+05	183	18.7	0.0027	14.49	0.68	0.254	55.6	44.6	10930	746	113.4	12.16	10.27	y
117	Output_1_139	ORD	2.15	0.16	0.28	0.1991	0.0051	0.007	0.0779	0.0057	0.0089	0.18402	0.14884	1169	27	38	1146	52	93	1030	240	1169	38	100.7	84.5	4.94E+05	305	30.2	0.086	15.23	5.88	1.63	127.8	54.8	9880	1293	61.7	5.29	10.42	n
118	Output_1_14	ORD	3.81	0.22	0.47	0.2787	0.0055	0.0087	0.0989	0.0051	0.01	0.47656	-0.12353	1584	28	44	1573	46	97	1541	190	1541	190	125.9	139.4	4.78E+05	201	12.9	0	20.6	0.98	0.53	91.3	65.7	10730	1151	145	15.8	17.7	y
119	Output_1_140	ORD	4.04	0.22	0.49	0.2883	0.0066	0.0096	0.1008	0.0047	0.01	0.56894	-0.14467	1631	33	48	1623	45	98	1587	190	1587	190	98.8	179.7	4.85E+05	650	11.8	4.7	25	8.9	0.332	54.3	37.1	10810	695	189	20.4	14.49	y
120	Output_1_142	ORD	4.21	0.22	0.5	0.285	0.005	0.0085	0.1062	0.0054	0.011	0.24981	0.10365	1616	25	42	1659	42	96	1678	190	1678	190	82.6	130.8	4.96E+05	153	16.4	0.0006	9.5	0.86	0.179	53.8	35.1	10340	692	136.8	16.1	11.97	y
121	Output_1_143	ORD	4.07	0.21	0.49	0.2886	0.0055	0.0089	0.1021	0.0052	0.01	0.25198	0.18799	1633	28	45	1630	41	94	1603	190	1603	190	85.6	140.3	4.98E+05	188	14.4	0.008	9.84	0.98	0.214	65.1	40.4	10530	813	147.2	16.23	12.45	y
122	Output_1_144	ORD	4.22	0.25	0.52	0.2949	0.0064	0.0096	0.102	0.0051	0.01	0.44957	-0.06329	1670	33	50	1656	47	97	1617	190	1617	190	152.6	154.3	4.73E+05	182	15.3	0.17	15.7	5.38	1.8	70.5	37.7	9870	799	165.9	18.6	15.35	y
123	Output_1_146	ORD	2.4	0.14	0.3	0.2166	0.005	0.0073	0.0804	0.0044	0.0083	0.37237	0.096133	1263	27	38	1226	41	85	1150	190	1263	38	265.3	339	4.80E+05	152	11.7	0.116	34.3	2.94	0.74	61.4	54	11760	821	268	22.9	28.3	y
124	Output_1_147	ORD	4.03	0.21	0.48	0.2904	0.0053	0.0088	0.1005	0.005	0.01	0.28727	0.064018	1642	27	44	1630	44	99	1593	190	1593	190	122.9	211	4.91E+05	186	10	0.049	16	1.52	0.32	60.5	39.3	11000	790	223	24.7	18.01	y
125	Output_1_148	ORD	3.84	0.2	0.46	0.2657	0.0068	0.0094	0.105	0.0046	0.01	0.56308	-0.053713	1517	35	48	1585	41	94	1684	180	1684	180	278	214.6	4.74E+05	479	17.7	1.43	80.5	31.4	10.69	190	108.7	10280	1920	207	23.6	24.1	y
126	Output_1_149	ORD	3.9	0.21	0.47	0.2773	0.0065	0.0093	0.1027	0.0049	0.01	0.41766	-0.01091	1576	33	47	1597	42	96	1652	180	1652	180	306	232	4.75E+05	1410	20.6	27.7	109	66	8.7	165	59.5	10330	1550	232	26.4	25.1	y
127	Output_1_15	ORD	3.66	0.19	0.44	0.2668	0.0071	0.0096	0.1002	0.0042	0.0097	0.44426	0.014415	1522	36	49	1549	38	90	1590	180	1590	180	310	313	4.69E+05	648	13.8	13.9	287	165	25	262	145.4	10740	2690	312	34.4	34.6	y
128	Output_1_150	ORD	4.11	0.2	0.48	0.2906	0.0054	0.0089	0.1036	0.0047	0.01	0.29808	0.057054	1643	27	44	1643	37	93	1645	170	1645	170	167.9	281	4.98E+05	251	10.6	0	16.7	1.04	0.207	75.5	46.4	11030	948	298	33.1	23.8	y
129	Output_1_151	ORD	5.36	0.27	0.64	0.3458	0.0073	0.011	0.1134	0.0047	0.011	0.52957	-0.11834	1913	35	53	1861	41	99	1817	170	1817	170	155.8	316	4.64E+05	284	7.5	1.76	37.1	21.6	6.18	125	67.3	10130	1369	393	48.2	19.77	y
130	Output_1_152	ORD	3.85	0.22	0.47	0.2849	0.0065	0.0095	0.0996	0.0056	0.01	0.22648	0.15702	1614	33	47	1581	47	99	1540	200	1540	200	76.4	134.2	4.95E+05	196	11.2	0	18.9	0.46	0.148	47.3	40.7	11710	676	137.6	14.6	10.94	y
131	Output_1_153	ORD	4.08	0.25	0.51	0.2845	0.0058	0.009	0.1055	0.0058	0.011	0.43463	-0.10905	1613	29	45	1627	48	97	1660	190	1660	190	170.4	185.7	4.94E+05	209	10.5	0.011	18.2	1.52	0.193	98.8	47	10850	1045	187.5	21.5	24.4	y
132	Output_1_154	ORD	3.75	0.2	0.45	0.2854	0.0062	0.0093	0.096	0.0044	0.0095	0.40309	-0.015894	1617	31	46	1565	41	94	1511	190	1511	190	141.9	171.8	4.75E+05	307	12.4	0.0053	50.7	1.4	0.4	94.2	65.9	10840	1139	175	18.1	19.1	y
133	Output_1_155	ORD	4.55	0.26	0.55	0.304	0.0064	0.0097	0.1099	0.006	0.011	0.24102	0.15429	1710	32	48	1720	45	98	1749	180	1749	180	129.3	183	4.86E+05	116	14.7	0	8.41	1.08	0.164	48.9	26.11	11250	601	198	23.7	19.8	y
134	Output_1_156	ORD	3.63	0.22	0.45	0.2824	0.0061	0.0091	0.0957	0.0052	0.0099	0.52304	-0.2118	1602	30	46	1540	51	100	1490	190	1602	46	59.5	95.2	4.85E+05	194	14	0	15.69	0.51	0.214	47.3	40	10340	667	95.9	9.97	8.35	y
135	Output_1_157	ORD	4.91	0.32	0.62	0.3316	0.0075	0.011	0.1094	0.0063	0.012	0.46845	-0.13096	1844	36	53	1776	53	100	1720	190	1720	190	96.7	113.6	4.71E+05	256	16.8	0.045	9.39	3.03	0.72	76	42.2	9820	902	135.4	15.8	12.36	y
136	Output_1_158	ORD	1.7	0.15	0.24	0.1616	0.0042	0.0057	0.0783	0.0069	0.0098	0.20673	0.087138	965	23	32	987	54	85	1000	250	965	32	133.7	126	4.82E+05	812	28.1	3.27	58	21.3	3.27	193.8	72.8	9710	1870	72.4	6.07	11.92	y
137	Output_1_159	ORD	5.17	0.27	0.62	0.3357	0.0066	0.01	0.1142	0.0057	0.012	0.27216	0.20455	1865	32	50	1829	43	98	1814	180	1814	180	176.4	302	4.60E+05	610	15.6	12.5	66.9	28.6	3.11	107.5	48.1	7610	1109	366	44.6	29	y
138	Output_1_16	ORD	3.87	0.22	0.47	0.2881	0.0055	0.0088	0.0982	0.0052	0.01	0.42455	-0.081397	1631	27	44	1586	46	97	1524	190	1524	190	65.9	116.7	4.83E+05	130	12.7	0	10.72	0.49	0.227	45.2	32.3	10450	611	126.4	13.8	9.58	y
139	Output_1_160	ORD	4.85	0.29	0.6	0.3315	0.0082	0.011	0.1086	0.0054	0.011	0.55266	-0.15873	1843	40	55	1768	50	100	1715	200	1715	200	109.7	113.7	4.65E+05	401	15.3	0.144	8.65	5.11	1.88	96.2	53.1	10060	1115	132.3	15.7	9.63	y
140	Output_1_161	ORD	3.72	0.2	0.45	0.2807	0.0059	0.009	0.0984	0.0045	0.0098	0.49194	-0.14951	1594	30	45	1564	45	98	1558	190	1558	190	170	191.1	4.85E+05	334	13.7	0.0042	42.8	1.87	1.11	95.8	66.9	9400	1166	193	20.6	24.3	y
141	Output_1_162	ORD	3.7	0.28	0.49	0.2812	0.0068	0.0096	0.0977	0.0067	0.011	0.43463	-0.089387	1595	34	48	1535	62	110	1490	220	1595	48	41.9	60.7	4.88E+05	113	20.6	0	12.75	0.81	0.48	32.5	23.15	9840	471	61.3	6.46	6.16	y
142	Output_1_163	ORD	4.03	0.26	0.51	0.2974	0.0062	0.0095	0.1015	0.0063	0.011	0.22277	0.087468	1677	31	47	1625	50	98	1590	190	1590	190	104.9	162.6	4.82E+05	205	14.1	0.0056	16.8	0.79	0.36	54.5	35	10180	715	172.2	19	15.7	y
143	Output_1_164	ORD	4.66	0.26	0.56	0.3176	0.0066	0.01	0.1107	0.006	0.011	0.35681	0.048955	1776	32	49	1748	46	100	1752	170	1752	170	101.9	210.2	4.69E+05	477	16.4	0	6.83	0.9	0.171	92.7	57	11090	1156	236	28	16.22	y
144	Output_1_165	ORD	3.56	0.2	0.43	0.2727	0.0051	0.0083	0.098	0.0052	0.01	0.38584	-0.032441	1554	26	42	1529	44	95	1523	190	1523	190	100.3	163.1	4.64E+05	219	12	0.0036	21.7	0.78	0.47	65.9	49.8	9920	872	158.7	16.7	14.01	y
145	Output_1_166	ORD	1.96	0.13	0.25	0.1923	0.0047	0.0066	0.0759	0.0049	0.0083	0.37116	-3.09E-06	1133	25	35	1088	44	81	1020	200	1133	35	182.3	151.7	4.75E+05	287	20.9	0.037	25.6	6.95	0.96	171.2	78.5	9980	1730	104.5	8.32	17.7	n
146	Output_1_167	ORD	4.09	0.24	0.5	0.2924	0.0059	0.0092	0.1032	0.0054	0.011	0.33693	0.022387	1652	29	46	1630	47	99	1630	200	1630	200	101.1	142.3	4.82E+05	254	10.5	0	11	0.77	0.38	97.7	61.7	10850	1192	148.4	16.6	14.45	y
147	Output_1_168	ORD	3.85	0.23	0.48	0.2896	0.0058	0.0091	0.0981	0.0051	0.01	0.3044	0.074869	1638	29	46	1589	49	100	1560	210	1560	210	163	176	4.62E+05	465	14.1	3.5	37.5	7.3	0.75	82.4	59.5	10220	1058	182	19.3	22.9	y
148	Output_1_169	ORD	2.15	0.11	0.26	0.2008	0.004	0.0063	0.0803	0.0043	0.0082	0.24656	0.15182	1179	21	34	1152	37	84	1130	210	1179	34	499	348	4.62E+05	242	8.1	1.04	71.3	11.8	2.6	182.3	76.6	10330	1980	248	21.3	51.6	y
149	Output_1_17	ORD	5.83	0.29	0.69	0.3578	0.0076	0.011	0.1208	0.0056	0.012	0.4234	0.0013101	1970	36	54	1939	44	100	1922	170	1922	170	116.9	238.2	4.67E+05	151	10.6	0.061	24.4	2.01	0.84	52.5	28.08	11430	627	320	42.7	21.4	y
150	Output_1_170	ORD	4.64	0.27	0.57	0.3069	0.0068	0.01	0.1134	0.0061	0.012	0.47298	-0.028968	1724	33	49	1741	49	100	1792	180	1792	180	143.4	176.1	4.63E+05	346	11.9	0.324	13.2	7.4	1.94	77.1	42.1	10840	899	193	23.2	14.42	y
151	Output_1_171	ORD	3.57	0.2	0.43	0.2762	0.0061	0.009	0.0964	0.0049	0.0098	0.42953	-0.0053516	1571	31	45	1523	44	95	1492	190	1571	45	113.3	135.1	4.65E+05	284	17.4	0.009	18.1	0.99	0.39	63.7	47.3	9940	834	131.2	13.58	14.97	y
152	Output_1_173	ORD	3.65	0.22	0.45	0.266	0.0053	0.0083	0.1012	0.0056	0.011	0.25915	0.09993	1519	27	42	1539	47	96	1590	210	1590	210	96	119.4	4.71E+05	231	6.9	0.0056	29.8	0.66	0.193	67.1	55.6	10920	879	113	12.07	13.28	y
153	Output_1_174	ORD	3.63	0.21	0.44	0.2809	0.0066	0.0095	0.0975	0.0051	0.01	0.46291	-0.040053	1594	33	47	1543	47	99	1510	200	1510	200	82.2	119.3	4.84E+05	181	10	0	21.7	0.44	0.351	46	41.3	10440	657	118	12.36	11.51	y
154	Output_1_175	ORD	2.76	0.17	0.34	0.195	0.01	0.011	0.1069	0.0051	0.011	0.74482	-0.0088783	1145	53	58	1325	45	90	1695	180	1695	180	518	404	4.25E+05	850	102	4.01	248	115	47.4	590	139.7	8840	4800	276	31	43.5	n
155	Output_1_177	ORD	4.29	0.24	0.52	0.3063	0.0064	0.0098	0.1042	0.005	0.01	0.54229	-0.142	1721	32	48	1672	44	96	1649	180	1649	180	155.5	210.6	4.72E+05	285	9.5	0.199	21.3	3.49	0.94	79.5	47.7	9940	965	232	25.9	23.1	y
156	Output_1_178	ORD	3.46	0.29	0.47	0.2638	0.008	0.01	0.0979	0.0084	0.012	0.01079	0.30935	1507	41	52	1474	69	110	1420	270	1507	52	17.93	37.8	4.96E+05	350	12.1	0.87	6.61	2.96	0.61	81.1	47.6	8600	942	35.4	3.71	2.43	y
157	Output_1_179	ORD	3.8	0.21	0.46	0.2824	0.0055	0.0088	0.1002	0.005	0.01	0.39713	-0.018578	1602	28	44	1574	42	94	1574	180	1574	180	134.8	185.8	4.83E+05	310	12.5	0.0054	25.5	0.81	0.403	81.5	59.7	10860	1026	188	20.1	19.1	y
158	Output_1_18	ORD	3.95	0.21	0.47	0.2857	0.0047	0.0083	0.1019	0.0051	0.01	0.32346	-0.0031705	1619	24	42	1607	41	94	1601	180	1601	180	217.2	235	4.68E+05	327	10.7	1.45	138	15.5	3.1	86.1	60.9	10750	1067	249	28.3	30.7	y
159	Output_1_180	ORD	3.73	0.23	0.46	0.276	0.0071	0.0098	0.1016	0.0054	0.01	0.59259	-0.15894	1569	36	49	1563	50	100	1590	200	1590	200	78.5	110.9	4.95E+05	257	13.2	0	36.1	1.32	0.54	65.7	51.4	10660	849	111	11.83	10.74	y
160	Output_1_181	ORD	3.54	0.22	0.44	0.2699	0.0061	0.0089	0.0978	0.0055	0.01	0.34197	0.027581	1539	31	45	1522	49	99	1530	200	1530	200	84.7	101	4.94E+05	1260	15.8	17	50	33.1	1.43	143.2	66.2	8910	1455	97.7	10.26	11.57	y
161	Output_1_182	ORD	4.17	0.26	0.52	0.2871	0.0068	0.0097	0.1097	0.0069	0.012	0.25378	0.12442	1625	34	48	1651	50	100	1710	180	1710	180	78.3	105.6	4.94E+05	195	14.3	0.128	6.63	5.82	1.04	118.7	44.7	8520	1147	107.7	12.39	11.25	y
162	Output_1_183	ORD	5.8	1.1	1.2	0.332	0.016	0.018	0.127	0.015	0.019	0.91859	-0.70981	1841	73	81	1840	110	130	1900	230	1900	230	84.2	81.9	4.82E+05	158	2.50E+03	0.28	14.7	3.37	0.95	54.4	27.2	9330	612	96.9	13.2	14.6	y
163	Output_1_184	ORD	3.69	0.18	0.44	0.2775	0.006	0.009	0.0994	0.0045	0.0098	0.34576	0.15331	1578	30	45	1556	38	93	1566	180	1566	180	148	205.7	4.85E+05	219	10	0.34	32.5	5.77	1.86	60.8	43.8	10950	777	204	21.5	19.5	y
164	Output_1_186	ORD	4.87	0.28	0.59	0.315	0.011	0.013	0.1151	0.0051	0.011	0.63205	0.0082097	1763	52	64	1776	47	100	1840	170	1840	170	165	237	4.91E+05	312	14.1	0.4	20.2	8.8	3.1	122	59.7	11260	1350	264	32.6	20.8	y
165	Output_1_187	MTL	3.6	0.32	0.49	0.2544	0.0081	0.0094	0.1019	0.0091	0.014	0.10898	0.19455	1459	42	48	1520	76	120	1520	300	1520	300	26.6	58.6	460000	175	9.9	0	6.35	0.47	0.156	54.5	34.2	9410	NA	55.8	6.03	4.26	y
166	Output_1_187	ORD	3.87	0.22	0.47	0.2856	0.0067	0.0096	0.1009	0.005	0.01	0.4833	-0.095249	1618	33	48	1589	43	92	1589	170	1589	170	294.1	273	4.44E+05	372	8.5	1.33	138	21.9	6.56	104	72.4	9550	1146	278	29.9	35.2	y
167	Output_1_188	MTL	2.24	0.33	0.41	0.1942	0.0094	0.01	0.085	0.014	0.016	0.030923	0.18275	1140	51	54	1100	120	140	890	400	1140	54	60.6	21.82	474000	186	22.9	0.056	35.2	3.81	2.36	31.2	12.36	7210	NA	15.92	1.4	6.76	n
168	Output_1_188	ORD	4.13	0.32	0.55	0.2928	0.0087	0.011	0.1039	0.0075	0.012	0.30114	0.011598	1653	43	56	1622	62	110	1630	200	1630	200	98.2	39.7	4.90E+05	710	8.9	1.91	44.3	12.1	3.87	166.9	71.5	8790	1690	41.5	4.64	14.03	y
169	Output_1_189	ORD	3.73	0.21	0.45	0.2724	0.0053	0.0084	0.1017	0.0051	0.01	0.47372	-0.083649	1552	27	43	1558	43	94	1599	190	1599	190	157.7	193.6	4.79E+05	526	27.4	0.131	28.9	3.23	0.88	133.4	94	10050	1610	188	20.3	21.1	y
170	Output_1_189	MTL	16.25	0.6	1.8	0.565	0.011	0.015	0.2062	0.0072	0.022	0.38572	0.19391	2883	46	63	2880	35	110	2854	170	2854	170	57.7	117.4	459000	164	11.4	0	16.34	0.83	0.078	44.8	35.2	9970	NA	249.1	54	16.55	y
171	Output_1_19	ORD	3.7	0.18	0.44	0.2767	0.0051	0.0084	0.0989	0.0044	0.0097	0.33761	0.027639	1574	26	42	1564	40	97	1569	190	1569	190	248	237	4.72E+05	307	9.3	0.183	43.3	8.1	1.82	169	100.8	9960	1920	239	26.5	33.5	y
172	Output_1_190	MTL	2.06	0.1	0.24	0.1834	0.0036	0.005	0.0808	0.0042	0.0092	0.16788	0.27145	1085	20	27	1126	35	81	1150	240	1085	27	60.9	196.9	459000	265	11.7	0	12.52	1.53	0.45	81.6	60.1	9410	NA	135.7	11.48	6.45	y
173	Output_1_190	ORD	4.89	0.27	0.59	0.3196	0.0072	0.011	0.1146	0.0062	0.012	0.19773	0.19416	1786	35	52	1780	45	100	1810	190	1810	190	39.3	74.4	4.87E+05	79	4.9	0	3.92	0.95	0.63	51.1	31.4	8810	629	85	10.31	6	y
174	Output_1_191	ORD	1.863	0.088	0.22	0.1808	0.003	0.0053	0.0758	0.0031	0.0073	0.422	-0.04111	1071	16	29	1058	31	77	1056	210	1071	29	334.4	417	4.67E+05	230	4.5	0.0002	22.4	2.59	0.275	198.7	89.3	10960	2090	271	22.2	30.9	y
175	Output_1_192	ORD	1.731	0.092	0.21	0.1733	0.0033	0.0053	0.0748	0.0037	0.0076	0.3182	-0.027057	1030	18	29	1014	34	78	1000	200	1030	29	313.2	329	4.77E+05	328	9.4	0.031	23.5	10.33	0.392	275.2	111.8	10060	2680	201.1	15.87	28.5	y
176	Output_1_192	MTL	5	0.14	0.54	0.2441	0.0057	0.0073	0.146	0.0047	0.015	0.29712	0.44012	1407	30	38	1816	23	91	2283	180	2283	180	324	458	426000	1120	35.9	8.42	223	318	56.4	403	85.8	10090	NA	422	64.8	40.5	n
177	Output_1_193	MTL	2.26	0.48	0.54	0.186	0.011	0.011	0.086	0.019	0.02	0.2724	0.19759	1096	57	60	960	190	220	610	520	1096	60	34.4	14.02	466000	310	31.5	0.05	31.5	1.75	1.29	68.1	38.9	8900	NA	9.87	0.88	3.71	n
178	Output_1_193	ORD	3.28	0.19	0.4	0.2636	0.0073	0.0096	0.0925	0.0045	0.0093	0.46764	0.078303	1506	37	49	1465	45	95	1421	190	1506	49	281	167.9	4.46E+05	373	19.2	0.73	45.4	19.1	7.1	123.2	68.5	9470	1313	155.2	15.6	16.7	y
179	Output_1_194	ORD	2.64	0.12	0.31	0.2258	0.0041	0.0068	0.0871	0.0036	0.0085	0.27294	0.12994	1312	21	36	1306	33	87	1330	200	1312	36	145.1	280.9	4.71E+05	253	7.1	0.041	14.26	2.44	0.69	75.5	49.9	10420	919	226.5	21.2	15.84	y
180	Output_1_194	MTL	5.13	0.26	0.6	0.313	0.0082	0.01	0.1171	0.0058	0.013	0.36988	0.10417	1753	40	49	1821	47	110	1875	210	1875	210	85.4	74.5	461000	142	17.8	0.62	20	1.81	0.55	48.5	23.54	9440	NA	88	10.8	14.58	y
181	Output_1_195	ORD	3.27	0.13	0.38	0.2534	0.005	0.0079	0.0958	0.0037	0.0092	0.30243	0.20373	1455	25	40	1469	30	84	1539	180	1539	180	161.5	200.5	4.81E+05	433	10.9	0.045	45.6	3.17	2.23	131.2	114.6	8240	1633	181.2	18.63	20.67	y
182	Output_1_195	MTL	3.71	0.17	0.42	0.2381	0.0071	0.0084	0.1119	0.0051	0.012	0.23338	0.36425	1375	37	44	1561	37	93	1798	210	1798	210	121.6	169.6	446000	393	15.8	1.15	46.1	25.5	5.99	90.8	42.1	10190	NA	149.1	17.44	15.21	n
183	Output_1_196	MTL	2.19	0.16	0.28	0.1992	0.0059	0.0069	0.0804	0.007	0.011	-0.019129	0.4011	1170	32	38	1173	54	92	1080	260	1170	38	176.1	112.9	482000	459	18.5	1.07	67.1	8.6	2.25	117.5	59.3	8790	NA	85.5	7.12	19.5	y
184	Output_1_196	ORD	3.71	0.13	0.42	0.2713	0.0051	0.0083	0.1019	0.0034	0.0096	0.36618	0.13628	1546	26	42	1565	28	89	1633	170	1633	170	254.7	266.6	4.51E+05	359	8	0.374	46.1	5.53	1.41	146.5	93.1	10740	1681	256.4	27.7	34.4	y
185	Output_1_197	ORD	4.08	0.22	0.49	0.2832	0.0057	0.0089	0.1081	0.0055	0.011	0.41113	-0.064467	1606	29	45	1636	47	100	1700	200	1700	200	65.2	97.8	4.66E+05	481	13.7	0	12.52	0.89	0.277	80.4	60.2	11360	1011	98.2	11.29	9.24	y
186	Output_1_198	MTL	2.23	0.11	0.26	0.1913	0.0044	0.0057	0.0832	0.0044	0.0095	0.12012	0.33906	1128	24	31	1179	35	81	1210	230	1128	31	189.7	178.7	462000	248	19.2	0.04	32.1	4.81	0.89	105.8	64.1	9790	NA	128.3	11.15	19.86	y
187	Output_1_198	ORD	4.03	0.18	0.47	0.2823	0.0057	0.0088	0.1061	0.0043	0.01	0.41513	0.045181	1602	28	44	1626	38	98	1708	180	1708	180	114.1	168.6	4.57E+05	198	13.9	0	15.54	0.74	0.382	57.7	37.1	9670	717	169	19.2	15.79	y
188	Output_1_198	BSA	4.91	0.25	0.43	0.3213	0.0072	0.0088	0.1107	0.0049	0.0089	0.41407	0.023746	1794	35	43	1787	40	71	1770	140	1770	140	149.1	303	4.45E+05	301	10.8	0.72	34.8	10.3	2.95	109	46	9260	1097	354	43.8	26.9	y
189	Output_1_199	BSA	3.73	0.27	0.38	0.2709	0.009	0.01	0.102	0.0074	0.01	0.29093	0.094069	1543	46	51	1572	58	83	1590	180	1590	180	34.6	47	4.68E+05	166	23.5	0.01	3.61	4.51	2.09	122.3	52.5	7950	1293	46.8	5.18	5.45	y
190	Output_1_199	ORD	3.87	0.17	0.45	0.2735	0.0071	0.0097	0.1066	0.0043	0.01	0.42334	0.21439	1557	36	49	1595	35	92	1704	180	1704	180	122.3	159.6	4.42E+05	498	18.4	4.25	76.7	77	18.1	157	49.2	9810	1414	153.7	17.51	12.68	y
191	Output_1_2	ORD	2.06	0.22	0.31	0.1792	0.0081	0.0092	0.0834	0.0096	0.012	0.11996	0.2315	1060	44	50	1132	76	110	1100	280	1060	50	42.7	43.8	4.89E+05	154	27.6	0.017	13.5	1.65	0.64	45.9	31	9810	561	31.2	2.47	3.56	y
192	Output_1_20	ORD	1.87	0.16	0.26	0.1873	0.0045	0.0064	0.0738	0.0061	0.0089	0.20648	0.09217	1110	26	36	1038	57	92	880	260	1110	36	94.2	77	4.64E+05	279	25.2	0.86	22.1	5.3	1.32	99	54.7	9310	1096	52.2	4.35	9.3	n
193	Output_1_200	MTL	2.16	0.15	0.27	0.1957	0.0046	0.0059	0.0787	0.0053	0.0096	0.21668	0.11209	1152	25	32	1145	48	88	1050	260	1152	32	282.2	118.8	459000	323	30.1	0.099	86.9	12.46	3.31	122.9	53.6	7670	NA	88	7.45	31.8	y
194	Output_1_200	BSA	4.48	0.21	0.38	0.305	0.0091	0.01	0.109	0.0053	0.009	0.245	0.31931	1714	45	51	1724	40	74	1760	150	1760	150	90.9	184	4.13E+05	212	10.3	1.14	40	13.9	4.1	83	31.5	8490	766	203	24.6	14.5	y
195	Output_1_201	MTL	1.95	0.13	0.24	0.1775	0.0039	0.0052	0.0785	0.0053	0.0095	0.099417	0.19132	1053	22	28	1080	43	82	1050	240	1053	28	34.6	158.1	469000	205	16.3	0.037	6.39	0.87	0.204	51.6	31.5	10050	NA	106.4	8.85	3.6	y
196	Output_1_201	BSA	6.3	0.27	0.53	0.2995	0.0079	0.0093	0.1518	0.0053	0.011	0.48393	0.093677	1686	39	46	2012	35	68	2351	140	2351	140	113.9	262	4.24E+05	1255	11.3	12.8	197	108	27	254	51.1	9330	1706	285	48.7	34.5	n
197	Output_1_202	BSA	4.81	0.22	0.41	0.2958	0.0091	0.01	0.1188	0.0049	0.0093	0.46024	0.22811	1667	45	51	1779	39	73	1914	140	1914	140	291	293	4.14E+05	595	17.4	4.87	79.6	52	15.3	179.4	43	8900	1342	314	42	29	n
198	Output_1_202	MTL	5.22	0.48	0.73	0.239	0.019	0.019	0.1547	0.0063	0.017	0.88385	0.057352	1370	99	100	1800	81	120	2369	190	2369	190	910	363	452000	672	57.3	4.05	200	261	59	479	70.6	10730	NA	292	48.1	25	n
199	Output_1_203	MTL	4.05	0.16	0.46	0.2779	0.0068	0.0085	0.104	0.004	0.011	0.42783	0.21541	1580	34	43	1636	34	95	1667	210	1667	210	171.6	221.5	450000	551	10.7	2.56	28.4	14.3	2.32	65.2	34.5	9450	NA	231.9	25.9	18.73	y
200	Output_1_204	BSA	3.77	0.21	0.34	0.2751	0.0079	0.009	0.0986	0.0044	0.0079	0.59339	-0.019848	1571	42	48	1568	44	72	1554	150	1554	150	146.8	166.6	4.27E+05	314	13.1	0.513	23.8	13.8	5.04	95.6	39.6	8480	948	169	18.6	16.3	y
201	Output_1_204	MTL	4.16	0.17	0.47	0.2829	0.0061	0.0081	0.1049	0.0042	0.011	0.34454	0.19322	1605	31	41	1657	34	94	1680	200	1680	200	134.2	207.5	458000	291	13.3	0.047	29.1	2.29	0.47	70.6	54.2	10530	NA	221.3	24.9	21.4	y
202	Output_1_205	MTL	4.73	0.22	0.54	0.3053	0.006	0.0083	0.1104	0.0049	0.012	0.28012	0.10785	1716	29	41	1759	39	97	1778	220	1778	220	134.7	127.9	467000	107	19	0.026	41.6	4.86	1.19	32.3	15.28	9350	NA	147.6	17.53	21.08	y
203	Output_1_205	BSA	15.85	0.7	1.3	0.566	0.014	0.017	0.2034	0.0075	0.016	0.53708	0.02846	2887	59	70	2853	42	81	2832	120	2832	120	213	180	4.14E+05	174	8.8	0.182	46.1	5.1	1.83	80.6	49.7	8240	908	372	84.7	63.4	y
204	Output_1_207	BSA	4.7	0.37	0.5	0.3027	0.0095	0.011	0.1107	0.0073	0.01	0.46251	-0.029075	1701	47	53	1725	65	89	1750	180	1750	180	20.93	30.8	4.40E+05	122	19.7	0	5.04	1.59	0.237	41.7	19.93	8150	506	34.1	4.34	3.83	y
205	Output_1_207	MTL	4.89	0.14	0.53	0.2879	0.0057	0.0078	0.1214	0.0036	0.013	0.26975	0.37734	1630	28	39	1796	23	92	1958	200	1958	200	310.4	324	460000	413	12.4	1.4	113	78.3	16.3	164.9	34.5	8560	NA	349.2	46.5	36.5	n
206	Output_1_208	MTL	2.26	0.12	0.26	0.1986	0.0051	0.0063	0.0819	0.0046	0.0095	0.085139	0.39037	1167	28	34	1188	37	83	1160	250	1167	34	90.7	142.9	461000	255	17.7	0.0011	12.93	0.82	0.327	53.5	38.3	10100	NA	106.9	9.6	10.36	y
207	Output_1_208	BSA	3.67	0.18	0.32	0.2753	0.0079	0.009	0.0962	0.0043	0.0078	0.36752	0.24483	1565	40	46	1550	40	71	1517	160	1517	160	90.7	101.2	4.48E+05	270	12	0.195	27.9	3.27	1.96	89.3	57.9	7930	1045	101.4	11.08	14.57	y
208	Output_1_209	MTL	1.89	0.11	0.23	0.1798	0.0038	0.0051	0.0752	0.0045	0.0088	0.15228	0.1483	1065	21	28	1072	42	85	1000	250	1065	28	110.9	154.4	449000	201	8.8	0.086	13.38	8.18	1.19	187	85.6	8930	NA	105.7	8.67	10.93	y
209	Output_1_209	BSA	14.73	0.56	1.2	0.546	0.013	0.016	0.1967	0.0072	0.015	0.38071	0.28691	2803	54	66	2785	36	77	2773	120	2773	120	70.3	121.6	4.32E+05	164	17.8	0.015	11.02	4.01	0.354	107.3	48.8	7580	1162	236	53	20.7	y
210	Output_1_21	ORD	3.72	0.21	0.45	0.288	0.0068	0.0097	0.097	0.0044	0.0096	0.60166	-0.1799	1630	34	49	1556	45	96	1534	180	1534	180	97.5	126.1	4.71E+05	338	17.4	1.5	24.4	3.3	0.46	69.3	50.6	9880	902	132.3	14.28	14.28	y
211	Output_1_210	MTL	2.35	0.3	0.39	0.1928	0.0087	0.0094	0.089	0.012	0.015	-0.1015	0.52242	1133	47	51	1165	92	120	1050	360	1133	51	82.2	27.78	449000	192	36.9	0.06	63.5	6.04	1.93	45	18.28	7130	NA	19.98	1.97	9.48	y
212	Output_1_210	BSA	4.72	0.33	0.47	0.31	0.013	0.014	0.1132	0.0086	0.011	0.20013	0.41744	1736	64	69	1757	58	84	1800	180	1800	180	48.4	75.1	4.30E+05	220	28	0.348	19.2	9.5	4.5	101	28.4	7480	875	83	10.5	8.49	y
213	Output_1_211	MTL	2.13	0.23	0.32	0.194	0.0074	0.0082	0.0771	0.0079	0.011	0.14751	0.18661	1141	40	45	1105	77	110	920	320	1141	45	112.7	36.9	462000	215	38.8	0.018	75.4	6.48	2.03	58.9	23.2	7510	NA	27.1	2.3	12.79	n
214	Output_1_211	BSA	3.41	0.22	0.33	0.2622	0.0095	0.01	0.0952	0.0056	0.0085	0.39623	0.24283	1498	48	53	1482	50	76	1470	170	1498	53	56.7	71.3	4.38E+05	165	10.4	0.0004	21.2	1.28	0.74	40.2	27.7	7860	543	68.8	7.25	8.84	y
215	Output_1_212	MTL	2.13	0.18	0.28	0.1986	0.0067	0.0076	0.0773	0.0067	0.01	0.11118	0.2938	1166	36	41	1124	62	100	950	300	1166	41	56.7	64.5	453000	269	23.3	0	19.39	1.01	0.437	59	44.8	9210	NA	49	4.13	6.45	n
216	Output_1_212	BSA	4.78	0.24	0.42	0.2911	0.0079	0.0092	0.1198	0.0057	0.0098	0.2925	0.26355	1645	40	46	1773	41	73	1919	150	1919	150	121.7	173.4	4.03E+05	371	16.4	5.4	39.5	30.6	7.55	100.8	31.9	7810	917	186	25	15.94	n
217	Output_1_213	BSA	4.82	0.21	0.41	0.3231	0.0082	0.0097	0.1092	0.0043	0.0085	0.55294	0.024819	1802	40	47	1775	37	71	1752	140	1752	140	165.4	176.2	4.34E+05	467	11.6	1.09	68.8	12.5	4.62	123.4	61.7	7700	1275	208	25.2	32.1	y
218	Output_1_213	MTL	4.99	0.22	0.57	0.3175	0.0074	0.0095	0.112	0.0045	0.012	0.41877	0.092665	1776	36	47	1805	37	94	1799	190	1799	190	104.1	146.1	447000	295	14.7	0.203	12.56	2.11	0.327	58.8	31.6	9580	NA	176.1	21.8	18.46	y
219	Output_1_214	MTL	4.17	0.25	0.51	0.2859	0.0072	0.009	0.1045	0.0063	0.012	0.12753	0.29293	1619	36	45	1643	52	100	1630	240	1630	240	81.6	85	451000	318	14.6	0.16	32.1	1.93	1.07	65.9	39.6	9080	NA	91.5	10.72	13.64	y
220	Output_1_214	BSA	5.01	0.26	0.45	0.314	0.0081	0.0096	0.116	0.0057	0.0097	0.35828	0.20689	1758	40	47	1802	43	74	1844	150	1844	150	147.1	283	4.37E+05	492	12.7	5.6	99	42	11.9	150	41.5	9130	1160	320	42.1	26.5	y
221	Output_1_215	MTL	4.01	0.28	0.5	0.238	0.018	0.018	0.1249	0.0065	0.014	0.73692	0.47286	1362	94	97	1607	58	110	1974	200	1974	200	560	266	431000	1100	27.1	2.95	119	129	27.6	359	91.1	10310	NA	219.7	30.3	16.5	n
222	Output_1_215	BSA	4.1	0.22	0.37	0.2795	0.0079	0.0091	0.1056	0.0049	0.0086	0.47052	0.1088	1587	40	46	1636	43	71	1690	150	1690	150	173.2	204	4.27E+05	397	11.9	2.45	75.9	27.5	9.41	109.3	27.9	7870	859	207.7	24.5	28.2	y
223	Output_1_216	MTL	1.92	0.21	0.29	0.1923	0.0064	0.0073	0.0706	0.0072	0.01	0.1684	0.14764	1132	35	40	1054	72	100	790	310	1132	40	108.6	39.6	460000	195	33.5	0.031	70	3.99	1.36	48.8	22.96	8010	NA	29.3	2.36	11.87	n
224	Output_1_216	BSA	14.63	0.63	1.2	0.536	0.013	0.015	0.198	0.0081	0.016	0.35845	0.18638	2762	53	64	2775	41	79	2779	130	2779	130	115.8	164.3	4.25E+05	255	12.1	2.18	20.4	10.2	1.2	132.8	57.9	7840	1351	320	70.7	33.3	y
225	Output_1_217	MTL	3.99	0.23	0.48	0.2875	0.0067	0.0086	0.1008	0.0059	0.012	0.13826	0.22633	1627	33	43	1619	48	100	1580	220	1580	220	72.8	74.7	459000	227	16.5	1.00E-04	19.04	1.76	1.18	51.9	39.6	7960	NA	81.4	9.06	12.06	y
226	Output_1_217	BSA	9.73	0.44	0.83	0.45	0.012	0.014	0.1579	0.0059	0.012	0.54895	0.17928	2392	52	61	2393	41	77	2405	130	2405	130	35.4	145	4.37E+05	140	13.9	0	3.58	0.53	0.237	30.6	6.02	9640	378	236	41.2	9.12	y
227	Output_1_218	MTL	4	0.19	0.46	0.2843	0.0072	0.0089	0.1013	0.005	0.011	0.23942	0.32477	1611	36	45	1620	39	95	1593	210	1593	210	79.2	110.8	450000	244	13.1	0.019	17.11	1.03	0.398	68.4	48.9	9410	NA	119.9	13.7	12.41	y
228	Output_1_218	BSA	4.74	0.24	0.41	0.3142	0.0086	0.01	0.1089	0.0047	0.0087	0.53061	0.087312	1758	42	49	1758	41	72	1742	140	1742	140	77	155	4.34E+05	227	34	0.036	7.76	1.07	0.299	65.8	36.8	8840	779	179	22	14.5	y
229	Output_1_219	BSA	4.09	0.17	0.34	0.2498	0.0072	0.0083	0.1197	0.0049	0.0094	0.34207	0.21519	1435	37	42	1647	35	69	1941	140	1941	140	373	270	4.10E+05	1002	33.3	6	161	89.3	34	386	73.1	8500	2720	247	32.9	37.8	n
230	Output_1_219	MTL	5.38	0.29	0.64	0.3329	0.0079	0.01	0.1151	0.0058	0.013	0.44086	-0.033087	1857	40	51	1861	48	100	1828	210	1828	210	117.2	100.3	432000	216	199	0.095	37.3	4.99	2.04	93.3	42.7	8610	NA	125.4	16.29	22.51	y
231	Output_1_22	ORD	4.64	0.32	0.59	0.304	0.01	0.013	0.1157	0.0077	0.013	0.32749	0.014877	1708	51	62	1735	54	100	1820	190	1820	190	38.9	52.4	4.81E+05	113	21.7	0.211	10.15	8.61	1.68	109.9	42.9	8540	1096	57.8	7.37	5.06	y
232	Output_1_220	MTL	2.94	0.16	0.35	0.2068	0.0056	0.0068	0.1018	0.0057	0.012	0.085834	0.39163	1210	30	36	1377	41	90	1600	230	1600	230	162.6	93.3	456000	433	26.1	0.43	25.2	18.1	3.61	94.5	54.5	9720	NA	73.8	8.58	9.05	n
233	Output_1_220	BSA	4.6	0.21	0.39	0.3146	0.0067	0.0084	0.1062	0.0046	0.0085	0.33602	0.14463	1762	33	41	1736	38	71	1693	150	1693	150	106.7	176.1	4.40E+05	236	7.6	0.108	26.7	2.83	1.66	88.1	48.3	8780	960	202.1	23.8	19.3	y
234	Output_1_221	MTL	3.79	0.2	0.45	0.2833	0.0083	0.0099	0.0958	0.0049	0.011	0.34113	0.13991	1606	42	50	1588	42	93	1501	220	1501	220	76	76.9	445000	268	17.9	1.38	10.4	7.45	1.12	121.4	49	8220	NA	84.1	9.22	12.43	y
235	Output_1_221	BSA	4.5	0.2	0.38	0.3147	0.0073	0.0089	0.1021	0.0043	0.008	0.29026	0.31488	1762	36	44	1717	37	68	1647	150	1647	150	74.2	201.7	4.40E+05	122	7.6	0.058	11.2	1.2	0.59	37.2	25.8	10030	511	231	26.8	13.51	y
236	Output_1_222	MTL	3.18	0.15	0.37	0.2096	0.0057	0.007	0.1095	0.0047	0.012	0.52472	0.18415	1225	31	37	1439	39	93	1751	210	1751	210	319	190.5	434000	426	50.5	1.57	81.1	57.9	15	152.9	46.8	9430	NA	150.7	18.86	18.35	n
237	Output_1_223	MTL	1.9	0.13	0.24	0.1469	0.0039	0.0047	0.0938	0.0068	0.012	-0.0884	0.42055	883	22	27	1062	45	83	1370	260	883	27	340	142.1	450000	630	21.2	202	500	366	6.02	200	49.8	8810	NA	80.1	8.48	11.52	n
238	Output_1_223	BSA	5.24	0.24	0.45	0.3156	0.0087	0.01	0.1187	0.0047	0.0093	0.31135	0.29181	1765	42	49	1844	39	71	1928	150	1928	150	157.1	255	4.33E+05	704	27.5	8.07	245	66.5	18.2	215	53	8830	1565	294	40	32.3	y
239	Output_1_224	BSA	3.3	0.2	0.31	0.2635	0.0066	0.0079	0.0907	0.0051	0.0079	0.39546	0.063861	1506	34	40	1468	49	76	1420	160	1506	40	57.8	77.9	4.45E+05	208	9.4	0	37.8	0.89	0.63	55.6	46.1	8870	738	76.1	7.7	8.75	y
240	Output_1_224	MTL	3.46	0.15	0.39	0.2686	0.0065	0.0082	0.0931	0.0041	0.01	0.21267	0.29198	1532	33	42	1513	36	95	1457	220	1532	42	139.7	168.9	472000	312	82	0.051	24.7	5.14	1.73	90.7	78.5	9910	NA	175.3	18.58	17.54	y
241	Output_1_225	BSA	4.53	0.21	0.39	0.2937	0.0095	0.011	0.1131	0.0051	0.0091	0.41671	0.305	1657	47	52	1726	39	73	1815	150	1815	150	190	234	4.50E+05	458	13.6	3.5	22.1	32.6	11.2	196	59.9	9180	1850	249	31.8	23.3	y
242	Output_1_225	MTL	10.47	0.3	1.1	0.4766	0.0088	0.013	0.1586	0.0045	0.017	0.33384	0.28913	2510	38	55	2471	26	99	2443	180	2443	180	122.8	161.7	458000	140	12.3	0.023	25.8	2.77	0.63	49.1	23.68	9410	NA	294	53.6	30.8	y
243	Output_1_226	MTL	2.16	0.17	0.28	0.1951	0.0056	0.0067	0.0816	0.0071	0.011	-0.080803	0.44337	1148	30	36	1138	58	95	1050	290	1148	36	115.8	67.8	462000	890	34.2	7.3	31.5	16.8	2.13	154.3	66.5	9390	NA	50.8	4.69	13.07	y
244	Output_1_227	MTL	3.57	0.19	0.42	0.2791	0.006	0.008	0.0926	0.0052	0.011	0.17974	0.25872	1592	32	42	1528	44	96	1410	230	1592	42	89.9	152	494000	544	35.5	0.229	16.89	1.42	1.15	98.4	85.9	11330	NA	163.2	17.5	13.36	n
245	Output_1_227	BSA	4.64	0.23	0.41	0.3111	0.0079	0.0094	0.1076	0.0046	0.0086	0.51953	-0.0045311	1744	39	46	1740	42	73	1720	140	1720	140	114.1	262	4.40E+05	267	10.2	1.05	32.9	10.9	4.15	82	36.8	9560	853	303	35.8	20.98	y
246	Output_1_228	BSA	3.77	0.27	0.38	0.278	0.0094	0.01	0.0988	0.0065	0.0093	0.32737	0.11947	1578	47	52	1568	53	76	1530	170	1530	170	35.8	48.3	4.43E+05	247	16.2	0.017	14.98	1.47	0.92	71.5	44.3	8860	874	49.2	5.49	5.64	y
247	Output_1_228	MTL	4.35	0.14	0.48	0.277	0.0062	0.0081	0.1136	0.0038	0.012	0.37283	0.31623	1575	31	41	1696	28	93	1847	180	1847	180	234.5	249	451000	612	11.5	1.31	84	78	16	213	75.8	10310	NA	267	35.5	23.35	n
248	Output_1_229	MTL	4.14	0.16	0.46	0.2975	0.0064	0.0085	0.1008	0.0041	0.011	0.018644	0.48275	1677	32	42	1653	31	91	1630	210	1630	210	62.2	134.1	447000	190	4.3	0	7.35	0.37	0.118	33.9	21.72	9780	NA	154.4	18.17	10.62	y
249	Output_1_229	BSA	4.84	0.25	0.43	0.3059	0.0091	0.01	0.1151	0.0051	0.0093	0.51303	0.17382	1717	45	51	1776	42	73	1840	140	1840	140	252	268	4.44E+05	654	12.9	3.65	73.8	53.5	17.4	251	64.9	9060	1990	304	39.1	27.5	y
250	Output_1_23	ORD	4.09	0.21	0.49	0.3019	0.0063	0.0096	0.1025	0.0046	0.01	0.45515	-0.047341	1699	31	48	1636	40	95	1624	180	1624	180	162.1	237	4.63E+05	128	10.6	0.014	17.05	1.12	0.291	82.8	53.2	10720	1038	258	29.4	25.1	y
251	Output_1_230	MTL	3.69	0.14	0.41	0.2622	0.0061	0.0079	0.1027	0.0043	0.011	0.32785	0.33816	1500	31	40	1567	34	96	1639	210	1639	210	256	202	443000	383	1330	0.385	79.5	22	5.74	123.7	79.5	7820	NA	204	24	35.2	y
252	Output_1_230	BSA	3.97	0.2	0.35	0.2967	0.0074	0.0088	0.0977	0.0047	0.008	0.26413	0.31256	1673	37	44	1620	41	72	1538	160	1538	160	69.9	126.7	4.43E+05	163	13.1	0	7.77	0.61	0.24	46.9	27	9530	563	139.2	15.29	11.33	y
253	Output_1_231	BSA	4.6	0.2	0.39	0.3152	0.0079	0.0094	0.1061	0.004	0.0082	0.48537	0.14371	1764	38	46	1737	35	67	1701	140	1701	140	109.5	184	4.39E+05	286	11.5	0	10.93	1.1	0.316	72.3	43.6	9910	886	211.2	25.4	19.4	y
254	Output_1_232	MTL	1.51	0.18	0.24	0.1569	0.0063	0.007	0.0682	0.0071	0.0099	0.30069	0.10102	938	35	39	889	68	92	690	310	938	39	20.03	44	439000	204	37.9	0	2.1	1.21	0.79	56.3	37.8	6440	NA	26.9	2.12	1.87	y
255	Output_1_232	BSA	4.57	0.18	0.38	0.2958	0.0082	0.0095	0.1126	0.004	0.0085	0.49378	0.21148	1668	41	47	1734	33	68	1813	140	1813	140	184.4	230.9	4.42E+05	394	12.3	1.42	26.9	25.7	8.43	135	46.2	9810	1213	252	31.8	21.2	y
256	Output_1_233	MTL	4.26	0.12	0.46	0.2909	0.0068	0.0087	0.1071	0.0033	0.011	0.36624	0.44966	1644	34	44	1681	24	90	1728	200	1728	200	313	460	437000	392	9.1	0.43	65.3	27.7	5.66	185.3	69.4	10380	NA	517	64	57	y
257	Output_1_233	BSA	4.7	0.2	0.39	0.3197	0.0087	0.01	0.1069	0.0039	0.0081	0.50356	0.18068	1785	42	49	1756	36	72	1716	150	1716	150	56.7	219.1	4.59E+05	111	3.46	0	19	0.069	0.186	26.5	28.7	11710	427	256	30.8	9.97	y
258	Output_1_234	MTL	0.71	0.13	0.15	0.0201	0.0015	0.0016	0.254	0.048	0.055	0.26378	0.075224	128.1	9.7	10	497	73	83	2750	370	2750	370	53.9	89.7	430000	149	137	0.88	10.54	1.6	0.47	25.1	31	8920	NA	7.02	1.99	2.44	n
259	Output_1_234	BSA	4.36	0.17	0.36	0.3015	0.0062	0.0078	0.1051	0.0038	0.008	0.30382	0.24713	1697	30	39	1695	31	65	1686	140	1686	140	117.3	203.9	4.98E+05	164	65.9	0.185	21.9	1.18	0.442	50.5	34.1	10500	666	224.2	26.7	19.17	y
260	Output_1_235	MTL	3.01	0.27	0.41	0.205	0.011	0.011	0.1082	0.0074	0.013	0.65588	-0.13315	1199	58	61	1391	71	110	1680	240	1680	240	492	185.7	436000	458	16.7	157	447	244	11.6	168	60	8680	NA	143.1	17.6	15.5	n
261	Output_1_235	BSA	3.75	0.2	0.33	0.2835	0.0072	0.0085	0.0963	0.0049	0.0081	0.34794	0.1407	1607	36	43	1566	43	73	1514	150	1514	150	110.5	116.8	4.40E+05	498	12.6	3.7	54.9	8.5	1.13	95.4	63.7	9650	1151	122	12.92	18.02	y
262	Output_1_236	MTL	1.86	0.1	0.22	0.1818	0.005	0.006	0.0746	0.0041	0.0086	0.29681	0.23015	1076	27	33	1056	38	79	1020	230	1076	33	310.4	238.9	451000	387	11.7	0.163	45.9	7.8	2.29	111	75.7	10690	NA	166.1	14.49	32.2	y
263	Output_1_236	BSA	4.62	0.22	0.4	0.3088	0.008	0.0094	0.109	0.0051	0.0089	0.30547	0.24129	1732	39	46	1738	39	71	1736	140	1736	140	83.8	199	4.40E+05	480	6.5	10.3	32.1	18.4	0.76	48.3	29.7	10250	592	223	27	13.85	y
264	Output_1_237	BSA	4.73	0.21	0.4	0.3142	0.0089	0.01	0.1096	0.0044	0.0085	0.49658	0.21378	1759	43	50	1760	37	71	1769	140	1769	140	201.7	186	4.57E+05	380	18.5	0.54	54.5	15.3	6.3	162	66.6	8280	1530	217	26.2	34.7	y
265	Output_1_237	MTL	8.6	0.37	0.97	0.449	0.01	0.013	0.14	0.0062	0.015	0.15635	0.36848	2390	45	59	2283	39	100	2187	200	2187	200	47.9	74.4	447000	185	11.7	0.0038	9.62	3.44	0.88	63.4	35.3	7400	NA	129	21.1	12.12	y
266	Output_1_238	BSA	0.681	0.092	0.1	0.052	0.0018	0.002	0.098	0.014	0.016	-0.15246	0.37179	327	11	12	511	54	61	1240	310	327	12	72.9	122.2	4.47E+05	183	460	0.148	14.07	1.02	0.53	54.2	44.9	8880	726	23.6	2.41	3.02	n
267	Output_1_238	MTL	3.86	0.14	0.43	0.2713	0.0075	0.0091	0.1034	0.0037	0.011	0.42498	0.40476	1546	38	46	1599	29	89	1663	200	1663	200	363	318	446000	226	23.3	0.89	82	51.9	12.6	129	32	9500	NA	331	39.9	33.2	y
268	Output_1_239	MTL	1.75	0.22	0.29	0.1763	0.0086	0.0092	0.075	0.01	0.013	-0.036003	0.45087	1044	47	50	977	82	110	760	340	1044	50	94.7	29.9	453000	311	25.2	0.075	46.6	2.15	1.15	71.7	45	9060	NA	20	1.69	10.45	n
269	Output_1_239	BSA	5.24	0.22	0.44	0.3082	0.0081	0.0095	0.1241	0.0048	0.0096	0.42512	0.20782	1730	40	46	1853	37	73	1997	130	1997	130	164	212.1	4.14E+05	514	18.3	3.62	65.1	29.5	9.7	162	48.8	8740	1400	243	33.9	25.8	n
270	Output_1_24	ORD	3.69	0.24	0.46	0.2755	0.0075	0.01	0.1019	0.0063	0.011	0.33511	0.096032	1567	37	50	1544	51	99	1580	200	1580	200	74.1	113.1	4.64E+05	258	13.4	0.0012	4.57	3.04	0.96	127	63.1	8430	1370	114.2	12.8	10.88	y
271	Output_1_240	BSA	4.55	0.19	0.38	0.3113	0.0073	0.0089	0.1059	0.0043	0.0083	0.27746	0.32738	1745	36	44	1729	34	69	1703	150	1703	150	125.7	257	4.45E+05	198	9	0.267	18.9	2.57	0.88	64.1	36.9	10000	779	298	35.3	21.8	y
272	Output_1_241	BSA	4.66	0.19	0.39	0.3199	0.0076	0.0092	0.1059	0.0037	0.008	0.48502	0.10154	1787	37	45	1750	34	69	1700	140	1700	140	105.1	223	4.40E+05	153	9.3	0.0089	12.53	0.94	0.419	54.1	33.6	9890	676	261	31.2	18.77	y
273	Output_1_241	MTL	5.33	0.2	0.6	0.2351	0.0068	0.0081	0.1655	0.0056	0.018	0.52186	0.27145	1359	35	42	1865	33	98	2493	180	2493	180	521	509	403000	1148	58.5	7.5	467	412	87	565	82	8900	NA	458	88.6	46.8	n
274	Output_1_242	MTL	8.33	0.36	0.94	0.394	0.013	0.015	0.153	0.0047	0.016	0.67979	0.036929	2135	58	68	2254	40	110	2371	190	2371	190	237	181	434000	690	8.7	2.61	79.4	48.6	10.8	115.3	53.5	9190	NA	269	47.7	25.06	y
275	Output_1_243	MTL	1.85	0.22	0.29	0.1884	0.0067	0.0076	0.0697	0.0078	0.01	0.27118	0.014387	1111	36	41	1012	82	110	730	330	1111	41	36.3	41.8	431000	281	28.4	0	13.64	0.97	0.64	55.8	40.6	8360	NA	30.5	2.53	4.13	n
276	Output_1_243	BSA	4.62	0.17	0.38	0.3204	0.0088	0.01	0.106	0.004	0.0082	0.42217	0.33039	1789	43	50	1749	33	71	1712	130	1712	130	66.2	162.7	4.55E+05	253	10.6	0	8.52	0.65	0.135	50.8	35.3	10780	658	192.6	22.9	11.79	y
277	Output_1_244	MTL	3.9	0.15	0.44	0.2926	0.0067	0.0086	0.0972	0.0038	0.011	0.2992	0.33268	1653	33	43	1607	32	92	1541	210	1541	210	140.6	195.7	447000	237	12.1	0.036	24.5	2.44	0.64	63.3	39.6	9450	NA	218.6	24.69	21.38	y
278	Output_1_244	BSA	4.31	0.17	0.35	0.3134	0.0078	0.0093	0.1001	0.0034	0.0075	0.48015	0.12845	1755	38	45	1691	31	66	1596	150	1596	150	79.2	136.4	4.34E+05	170	10.8	0	5.18	1.55	0.34	95.3	43.3	9900	996	157.7	17.8	13.03	y
279	Output_1_245	MTL	1.84	0.16	0.25	0.1871	0.0056	0.0066	0.0707	0.0062	0.0095	0.069431	0.16912	1104	30	36	1027	60	93	800	290	1104	36	65.2	63.3	452000	323	26.2	0.13	27.2	1.79	0.82	70.3	44.6	8910	NA	45.5	3.79	7.22	n
280	Output_1_245	BSA	3.71	0.41	0.49	0.239	0.021	0.022	0.1158	0.0099	0.013	0.63933	0.23233	1380	110	110	1560	89	110	1860	190	1860	190	386	317	4.76E+05	1120	80	8.2	160	131	51.1	585	80.3	1.09E+04	3720	266	33.3	24	n
281	Output_1_246	MTL	4.32	0.28	0.53	0.309	0.0087	0.01	0.103	0.0075	0.013	-0.032024	0.39358	1733	43	52	1679	54	100	1550	260	1550	260	63.3	65	448000	265	21.5	4.00E-04	13.67	1.53	0.65	63.7	31	8750	NA	77.5	8.94	11.13	n
282	Output_1_246	BSA	4.83	0.2	0.4	0.2723	0.0093	0.01	0.1294	0.0056	0.01	0.25744	0.44383	1549	47	52	1778	37	72	2074	140	2074	140	335	254	4.47E+05	1160	20.2	7	88	66	22.8	268	57.7	10250	1930	259	38.2	28.9	n
283	Output_1_247	MTL	3.67	0.23	0.45	0.2787	0.0066	0.0084	0.0962	0.0059	0.011	0.31365	0.010655	1583	33	42	1552	49	97	1490	220	1583	42	61.5	72.9	444000	675	8.9	3.67	41.6	9.5	1.78	105.2	75.8	8860	NA	79.1	8.75	9.77	y
284	Output_1_247	BSA	3.7	0.15	0.31	0.2747	0.0076	0.0088	0.0988	0.0039	0.0077	0.48224	0.23415	1569	36	42	1566	34	69	1565	140	1565	140	151.3	182.2	4.44E+05	275	7.6	0.098	52.8	2.02	0.83	92.6	72.9	11340	1191	187.3	20.6	22.79	y
285	Output_1_248	MTL	1.87	0.18	0.27	0.1827	0.0073	0.008	0.076	0.0077	0.011	0.072203	0.30989	1080	39	44	1041	65	96	860	320	1080	44	21.8	41.3	451000	220	22	0	6.99	1.61	0.73	71.4	34.9	8500	NA	28.7	2.42	2.49	n
286	Output_1_248	BSA	4.79	0.22	0.41	0.2723	0.0071	0.0083	0.1255	0.0047	0.0096	0.41763	0.15658	1557	38	44	1769	37	69	2026	150	2026	150	213	333	4.09E+05	1008	36.1	11.78	236	118.4	37.9	407	64.3	9890	2640	337	47.9	31.7	n
287	Output_1_249	MTL	4.2	0.15	0.46	0.2806	0.0062	0.0081	0.1097	0.0042	0.012	0.25964	0.37145	1593	31	41	1672	29	94	1765	190	1765	190	155.6	297	451000	569	14.5	0.8	46.5	39.9	7.7	143.8	66.7	10520	NA	321.2	40.5	25.5	y
288	Output_1_249	BSA	4.64	0.2	0.39	0.3182	0.0081	0.0095	0.106	0.0041	0.0082	0.45549	0.19917	1778	39	47	1744	36	70	1697	140	1697	140	82.9	192.5	4.45E+05	150	7.1	0.057	8.7	1.16	0.42	53.8	33.1	10500	664	228	27.1	13.78	y
289	Output_1_25	ORD	4.84	0.25	0.58	0.3333	0.0066	0.01	0.1086	0.0048	0.011	0.47786	-0.02508	1853	32	50	1773	43	99	1744	190	1744	190	141.5	269	4.60E+05	217	4.8	0.037	12.14	1.41	0.41	82.8	50	10010	1028	328	40	24.1	y
290	Output_1_250	MTL	2.44	0.3	0.39	0.194	0.013	0.014	0.097	0.015	0.018	0.21309	0.3137	1135	74	76	1222	95	130	1270	340	1135	76	44.5	33.4	454000	55	8.4	0.044	5.97	3.38	0.75	16.1	24	14610	NA	26.6	2.78	2.43	n
291	Output_1_250	BSA	4.61	0.24	0.41	0.2893	0.0098	0.011	0.1152	0.0048	0.0091	0.60644	0.031481	1635	49	54	1738	43	74	1854	140	1854	140	260	262	4.63E+05	833	29.8	6.5	52.5	49.2	15.3	282	76.8	10250	2350	283	36.9	32.5	n
292	Output_1_251	MTL	2.04	0.11	0.24	0.1992	0.0049	0.0062	0.0753	0.0043	0.0088	0.22743	0.26074	1170	27	33	1121	41	87	1020	230	1170	33	138.8	155.5	438000	211	15.4	0	16.11	2.05	0.56	77.5	41.4	9310	NA	119.8	10.49	16.5	n
293	Output_1_251	BSA	4.5	0.16	0.36	0.3154	0.008	0.0094	0.1048	0.0036	0.0079	0.44593	0.24837	1765	39	46	1723	30	67	1683	140	1683	140	59.3	155.8	4.48E+05	398	9.9	0	3	0.96	0.222	88.6	51.5	11050	1041	181	21.16	10.01	y
294	Output_1_252	MTL	3.44	0.15	0.39	0.2721	0.0064	0.0082	0.0918	0.0038	0.01	0.31052	0.20634	1550	33	42	1502	35	92	1450	200	1550	42	104.7	146.7	445000	441	5.89	0.047	46.7	3.28	2.08	131.9	107.5	9150	NA	154.1	16.16	16.73	y
295	Output_1_252	BSA	4.35	0.21	0.38	0.2865	0.0086	0.0098	0.1116	0.0055	0.0093	0.16489	0.41046	1622	43	49	1694	41	73	1796	150	1796	150	133	148.9	5.07E+05	448	14.9	1.19	20.2	17.3	6	135	53.9	12380	1315	156.6	19.8	12.45	y
296	Output_1_253	BSA	4.72	0.19	0.39	0.302	0.0067	0.0083	0.1143	0.0047	0.009	0.24314	0.33096	1700	33	41	1759	34	70	1832	140	1832	140	149.1	251	4.52E+05	443	12.2	1.34	51.1	29.7	8.4	132	44.8	10410	1126	278	35.8	23.5	y
297	Output_1_254	MTL	2.05	0.11	0.24	0.2025	0.0048	0.0062	0.0736	0.0036	0.0083	0.31638	0.13028	1188	26	33	1121	36	82	960	250	1188	33	52.8	165.9	459000	165	6.2	0	10.83	0.77	0.127	76.5	40.6	9150	NA	130.6	10.82	6.3	n
298	Output_1_255	MTL	3.5	0.2	0.42	0.2811	0.007	0.0088	0.0897	0.005	0.01	0.19924	0.19753	1595	35	44	1508	46	94	1360	230	1595	44	86.3	104.6	460000	349	10	0.0082	30.7	1.3	1.78	94.6	73.4	8710	NA	113.1	11.51	13.05	n
299	Output_1_255	BSA	4.64	0.17	0.38	0.3138	0.0064	0.0082	0.1073	0.004	0.0082	0.21278	0.37641	1758	32	40	1753	30	65	1721	150	1721	150	73.1	122.8	4.44E+05	169	15.3	0	12.47	0.85	0.193	40	25.9	9940	544	144.4	17.28	12.37	y
300	Output_1_256	MTL	1.892	0.096	0.22	0.1741	0.0048	0.0058	0.0792	0.0044	0.0091	0.17019	0.4067	1034	26	32	1068	34	78	1100	240	1034	32	239	186.6	462000	361	15.4	0.219	74.5	13.2	3.28	105.7	59.3	9620	NA	125.9	11.17	19.23	y
301	Output_1_256	BSA	4.36	0.31	0.44	0.305	0.011	0.012	0.1056	0.0079	0.011	0.13911	0.35574	1714	57	62	1671	59	84	1620	190	1620	190	21.67	19.34	4.60E+05	121	33.6	0	4.31	1.34	2.39	59.5	34.2	8160	676	22.1	2.55	3.52	y
302	Output_1_257	MTL	2.56	0.2	0.34	0.191	0.013	0.014	0.0982	0.0056	0.011	0.72867	0.3029	1122	73	75	1264	60	100	1530	230	1530	230	180	133.6	479000	261	13.2	0.305	25.1	18.7	5.29	140.7	88.2	10510	NA	94.7	10.34	12.7	n
303	Output_1_257	BSA	5.08	0.21	0.42	0.3252	0.0083	0.0098	0.1135	0.0047	0.009	0.35147	0.35937	1812	40	48	1820	36	71	1832	140	1832	140	108.3	187	4.44E+05	303	10.8	1.58	41.3	13.7	4.64	95.6	40.4	10290	984	226	28.8	17.54	y
304	Output_1_258	MTL	2.01	0.15	0.26	0.1931	0.0043	0.0056	0.076	0.0055	0.0095	0.19714	0.092352	1137	23	30	1096	51	87	960	260	1137	30	160.5	85.9	451000	223	24.9	0.042	71	3.8	1.26	67.8	33.1	8100	NA	63.6	5.43	17.67	n
305	Output_1_259	MTL	3.81	0.16	0.43	0.2873	0.0063	0.0083	0.0971	0.0039	0.011	0.35666	0.23244	1627	31	41	1585	33	91	1544	210	1544	210	100.8	147.8	456000	287	10.2	0	23.62	1.21	0.68	68.6	51.4	9210	NA	162.8	17.88	17.08	y
306	Output_1_26	ORD	3.73	0.2	0.45	0.2969	0.0071	0.01	0.0953	0.0049	0.0097	0.23524	0.20277	1674	35	50	1561	43	95	1506	190	1506	190	221	231	4.36E+05	462	11	1.67	53.1	22.2	6.26	133.3	74.3	9930	1473	250	26.4	27.3	n
307	Output_1_260	MTL	2.23	0.17	0.29	0.199	0.0061	0.0072	0.0819	0.0063	0.01	0.14644	0.19165	1168	33	38	1174	57	97	1120	280	1168	38	43.5	62.9	447000	244	21.6	0.173	11.28	1.74	0.58	75.6	42.5	9350	NA	48.5	4.44	5.28	y
308	Output_1_261	MTL	4.43	0.15	0.49	0.2403	0.0068	0.0081	0.1333	0.006	0.015	0.0044241	0.70155	1387	35	42	1711	27	91	2113	200	2113	200	449	310	453000	560	43.8	5.46	213	307	57.5	375	55.6	10070	NA	287.9	43.4	48.6	n
309	Output_1_261	BSA	4.52	0.19	0.38	0.3136	0.0091	0.01	0.1051	0.0041	0.0081	0.47422	0.26951	1755	45	51	1721	36	71	1679	150	1679	150	96.6	136.4	4.52E+05	171	11	0.0014	14.09	0.88	0.565	47.4	26.6	8740	607	159.2	18.75	16.99	y
310	Output_1_262	MTL	4.49	0.11	0.48	0.3007	0.0057	0.008	0.1084	0.0025	0.011	0.43655	0.4074	1694	28	40	1724	21	91	1761	190	1761	190	91.1	603	457000	140	5.64	0.165	5.31	2.72	0.7	25.6	23.9	12460	NA	703	84.9	15.12	y
311	Output_1_262	BSA	4.93	0.17	0.39	0.3254	0.0086	0.01	0.1107	0.0038	0.0083	0.37976	0.38009	1813	42	49	1799	30	69	1795	130	1795	130	84.4	166.8	4.65E+05	447	12.5	0.0017	8.54	1.55	0.422	106.8	64.3	11280	1259	204.8	25.5	14.89	y
312	Output_1_263	MTL	4.15	0.15	0.46	0.2923	0.0059	0.008	0.1029	0.0037	0.011	0.3639	0.21714	1652	29	40	1657	30	91	1649	200	1649	200	169	167.1	448000	265	9.2	0.096	35.5	8.19	3.1	90.5	49.3	8670	NA	188.7	21.8	24.4	y
313	Output_1_263	BSA	4.96	0.25	0.44	0.3237	0.0097	0.011	0.1126	0.0061	0.0097	0.17741	0.39775	1804	47	54	1794	43	75	1770	160	1770	160	31.8	46.6	4.64E+05	109	17.4	0.027	6.04	3.5	0.84	80.9	35.7	7970	854	57	7.22	5.88	y
314	Output_1_264	MTL	1.89	0.21	0.29	0.1823	0.0072	0.008	0.0789	0.0095	0.012	-0.043313	0.37752	1077	39	43	1031	82	110	840	340	1077	43	45.7	47.4	458000	334	28.7	0	15.91	1.11	0.83	72.1	50.9	8940	NA	33	2.83	5.04	n
315	Output_1_264	BSA	2.37	0.17	0.24	0.1927	0.0058	0.0066	0.0894	0.006	0.0085	0.36256	0.044455	1134	31	35	1217	53	74	1320	190	1134	35	48.3	66.7	4.40E+05	201	83	1.47	11.39	2.43	0.54	54.7	33.2	8890	639	48.2	4.91	6.07	n
316	Output_1_265	BSA	3.48	0.18	0.31	0.236	0.01	0.011	0.1085	0.0044	0.0085	0.70134	0.082798	1363	53	57	1514	45	76	1738	140	1738	140	505	261	4.53E+05	1460	35.2	7.32	97	102	43.9	407	79.5	10570	2820	224.7	27.6	22.4	n
317	Output_1_265	MTL	4.57	0.19	0.52	0.3152	0.0065	0.0088	0.1057	0.0045	0.012	0.265	0.24526	1765	32	43	1732	36	95	1686	210	1686	210	138.6	112.9	460000	239	18.5	0	25.3	2.19	0.87	66.5	30.86	9160	NA	136.9	16.02	24.08	y
318	Output_1_266	MTL	3.39	0.27	0.45	0.2611	0.0077	0.0092	0.0967	0.0079	0.013	0.20812	0.13477	1493	40	47	1476	67	110	1440	250	1493	47	19.8	46.8	456000	76	2.21	0	4.81	0.041	0.053	13.7	13.3	10260	NA	47.4	5.11	3.15	y
319	Output_1_266	BSA	3.62	0.16	0.31	0.271	0.0071	0.0083	0.097	0.0038	0.0075	0.504	0.16232	1544	36	42	1541	36	67	1530	150	1530	150	145.5	197	4.25E+05	263	44	0.359	38.4	6.91	2.75	79.8	51	10500	912	200.7	22	20.56	y
320	Output_1_267	MTL	4.02	0.18	0.46	0.2875	0.0061	0.0081	0.1022	0.0043	0.011	0.31983	0.13376	1628	30	40	1628	35	89	1627	200	1627	200	122.7	146.8	460000	233	6.9	1.4	35.1	1.7	0.66	66.6	44.8	9840	NA	162.2	18.28	20.35	y
321	Output_1_267	BSA	14.53	0.49	1.2	0.548	0.013	0.016	0.1946	0.0069	0.015	0.31202	0.32656	2811	55	66	2780	34	80	2757	120	2757	120	52.3	107.8	4.60E+05	147	11.5	0.008	12.57	1.17	0.127	53.4	32.1	9190	661	224.8	49.1	14.76	y
322	Output_1_268	MTL	3.83	0.48	0.63	0.2706	0.0087	0.01	0.104	0.011	0.015	0.83585	-0.54322	1541	44	50	1545	72	94	1590	260	1590	260	59.9	80.7	466000	274	13.9	0.003	14.73	0.66	0.3	50.8	42.8	10060	NA	83.4	9.6	9.2	y
323	Output_1_268	BSA	4.8	0.21	0.41	0.3031	0.0083	0.0096	0.1152	0.0046	0.009	0.4587	0.16915	1704	41	47	1771	38	73	1846	140	1846	140	77.7	184.1	4.60E+05	242	9.2	1.1	39	15	3.3	72	31.3	10660	682	211.6	27.6	13.2	y
324	Output_1_269	MTL	3.3	0.47	0.58	0.2651	0.0099	0.011	0.09	0.012	0.015	0.23665	-0.027165	1512	51	57	1400	120	150	1070	370	1512	57	17.5	17.42	456000	196	22.8	0.0042	12.22	1.27	1.66	43.3	36.5	6480	NA	17.9	1.78	2.93	n
325	Output_1_269	BSA	4.55	0.16	0.37	0.3155	0.0078	0.0093	0.1056	0.0036	0.0079	0.47793	0.20073	1766	38	45	1736	32	71	1698	140	1698	140	291	174.7	4.59E+05	185	23.8	0.199	45.4	12.39	2.66	113.3	39.4	9540	1069	205.5	24.6	47.4	y
326	Output_1_27	ORD	3.45	0.19	0.42	0.2628	0.0061	0.0088	0.1001	0.0051	0.01	0.35838	0.098938	1503	31	45	1497	44	98	1560	200	1560	200	165.6	126.4	4.09E+05	411	35.2	0.75	33.7	15.2	5.02	94	51	8590	1039	118.9	13.38	17.08	y
327	Output_1_270	MTL	5.02	0.21	0.57	0.2962	0.0082	0.0099	0.1253	0.006	0.014	0.060082	0.50026	1670	41	49	1818	33	91	2003	190	2003	190	223.4	143.8	442000	242	5.8	0.59	45.2	32.6	7.12	134.9	54.5	9510	NA	162.5	22.5	30	n
328	Output_1_270	BSA	5.42	0.19	0.43	0.2999	0.0077	0.0091	0.1327	0.0048	0.01	0.28685	0.34867	1689	38	45	1884	30	69	2107	130	2107	130	108.5	257	4.64E+05	767	9.4	4.19	121	49.2	16.9	184	42.2	10590	1268	294	43.4	27.3	n
329	Output_1_271	MTL	1.58	0.11	0.2	0.1669	0.0047	0.0056	0.0711	0.0056	0.0091	-0.048288	0.40615	994	26	31	961	42	77	850	250	994	31	53.7	79	451000	210	24.8	0.047	3.93	6.91	1.47	176.4	67.1	7630	NA	50.9	3.91	4.96	y
330	Output_1_271	BSA	5.05	0.2	0.42	0.2952	0.0069	0.0084	0.1255	0.0051	0.0098	0.33855	0.33942	1665	34	42	1816	34	70	2000	140	2000	140	248	277	4.59E+05	542	13.4	3.32	73.2	46.5	15.1	180	44.2	10160	1367	306	42.7	26.3	n
331	Output_1_272	BSA	4.47	0.19	0.37	0.3025	0.0081	0.0094	0.1086	0.0055	0.0091	0.053123	0.53399	1701	40	47	1714	35	70	1722	150	1722	150	50.7	87.7	4.65E+05	224	16.4	0.19	8.26	3.67	1.3	60.2	32.2	9050	681	100.3	12.2	7.24	y
332	Output_1_272	MTL	4.64	0.2	0.53	0.3066	0.0072	0.0092	0.1103	0.0047	0.012	0.16202	0.31687	1729	34	43	1744	38	98	1789	210	1789	210	92.6	170.7	464000	379	14.7	0.322	19.8	24.6	3.83	91.3	49.1	10640	NA	201.5	24.7	14.75	y
333	Output_1_273	MTL	3.79	0.14	0.42	0.2807	0.0046	0.007	0.0989	0.0038	0.011	0.16723	0.27564	1594	23	35	1582	30	91	1571	200	1571	200	198.3	192.8	459000	305	6.11	0.075	30.8	1.23	1.21	74.7	80.5	9510	NA	207.5	22.66	29.7	y
334	Output_1_273	BSA	4.58	0.22	0.39	0.3165	0.0082	0.0096	0.1047	0.0049	0.0085	0.27176	0.28258	1770	40	47	1729	41	74	1670	160	1670	160	51.9	79.4	4.79E+05	80	9.5	0	7.11	0.75	0.82	41.3	28.3	9200	544	95.5	11.22	8.74	y
335	Output_1_274	MTL	2.18	0.37	0.43	0.195	0.01	0.011	0.082	0.014	0.016	0.047005	0.22684	1147	54	58	1040	120	150	740	410	1147	58	42.6	18.84	442000	141	28.4	0.027	41.8	2.02	0.97	23.6	11.78	7600	NA	14.1	1.26	4.82	n
336	Output_1_274	BSA	4.52	0.16	0.36	0.2902	0.0074	0.0088	0.1137	0.0041	0.0086	0.33649	0.36513	1641	37	44	1727	30	68	1841	130	1841	130	231	180.1	4.57E+05	453	15.7	5.21	41.3	37.6	9.97	193	53.3	8690	1602	198.1	25.6	23.9	n
337	Output_1_275	BSA	7.13	0.31	0.6	0.3078	0.0071	0.0087	0.1681	0.0069	0.013	0.35288	0.1575	1734	37	45	2114	38	73	2505	130	2505	130	159.9	288	4.15E+05	1235	13.6	14.2	276	110.9	28	289	50.6	9080	1850	341	63.6	47.3	n
338	Output_1_275	MTL	11.21	0.41	1.2	0.435	0.012	0.015	0.1865	0.0052	0.02	0.66143	0.20314	2335	58	70	2530	35	110	2697	170	2697	170	233	162.5	498000	287	15.4	0.3	27.2	20.9	4.07	114.9	61.6	11270	NA	269.6	55.6	18.41	n
339	Output_1_276	MTL	2.13	0.11	0.25	0.1985	0.0049	0.0061	0.0791	0.004	0.0089	0.25034	0.28706	1166	26	33	1148	36	84	1130	230	1166	33	217.6	159.2	459000	318	13.3	0.029	68.4	2.4	1.11	87.2	57.5	9700	NA	121.7	10.66	24.5	y
340	Output_1_277	BSA	4.49	0.16	0.36	0.3152	0.0057	0.0076	0.1031	0.0036	0.0078	0.29652	0.26358	1765	28	37	1720	29	67	1652	150	1652	150	85.1	236.4	4.69E+05	131	5.66	0	10.56	0.5	0.115	47.9	33.6	11240	645	282.2	32.8	13.86	y
341	Output_1_277	MTL	10.86	0.39	1.2	0.476	0.011	0.014	0.1679	0.0064	0.018	0.23019	0.31421	2507	49	63	2514	33	100	2534	180	2534	180	74.2	85.8	455000	157	12.3	0	30.5	2.15	0.88	31.9	17.83	8790	NA	155.5	29.3	19.2	y
342	Output_1_278	MTL	3.79	0.16	0.43	0.2833	0.0073	0.009	0.0992	0.0045	0.011	0.197	0.38429	1606	37	45	1585	36	95	1578	220	1578	220	118.7	147	443000	250	13.7	7.00E-04	21.84	1.1	0.71	67.5	50.6	8480	NA	159.2	17.58	19.27	y
343	Output_1_279	MTL	1.92	0.15	0.25	0.1909	0.0063	0.0072	0.0746	0.0062	0.0098	0.15281	0.26211	1125	34	39	1062	53	88	900	270	1125	39	56.6	65.2	446000	288	24.2	0.004	18.28	1.08	0.54	59.1	46.6	9410	NA	47.8	3.91	6.41	n
344	Output_1_28	ORD	3.35	0.26	0.44	0.2806	0.0063	0.0092	0.0901	0.0064	0.01	0.30128	0.03647	1593	32	46	1460	59	100	1320	230	1593	46	74.5	63.9	4.68E+05	407	21.2	0.009	24.5	3.12	2.01	121.5	66.5	9040	1324	65.3	6.69	10.58	n
345	Output_1_280	MTL	9.6	0.52	1.1	0.461	0.013	0.016	0.1557	0.0091	0.018	0.22161	0.27013	2438	57	69	2382	54	120	2367	190	2367	190	50	42.5	462000	216	12.6	0.024	16.89	3.45	0.65	72.5	38.7	9360	NA	74.9	12.59	12.21	y
346	Output_1_281	MTL	10.16	0.36	1.1	0.4656	0.0094	0.013	0.1602	0.0055	0.017	0.35473	0.19862	2462	41	57	2439	34	110	2445	180	2445	180	124.4	91.8	459000	235	21.2	0.15	35.5	11.06	3.62	152.6	78.7	6820	NA	162.1	28.9	30.47	y
347	Output_1_282	MTL	2.03	0.2	0.29	0.1903	0.0056	0.0066	0.0788	0.0077	0.011	0.12986	0.13435	1121	30	36	1083	68	99	940	300	1121	36	46.6	56.3	444000	230	33.3	14.2	37	5	0.48	49.1	31.9	8810	NA	40.6	3.52	5.07	n
348	Output_1_283	MTL	10.56	0.29	1.1	0.468	0.011	0.014	0.1664	0.005	0.018	0.31824	0.45142	2469	49	62	2479	27	100	2504	180	2504	180	200.9	150.4	436000	256	8.3	0.161	39.8	7.16	1.6	57.9	27.3	7630	NA	268.5	49.4	51.3	y
349	Output_1_284	MTL	5.38	0.25	0.62	0.3437	0.0078	0.01	0.1147	0.0053	0.013	0.24329	0.29184	1902	37	49	1867	39	97	1829	210	1829	210	71.2	130.1	442000	190	12	0.001	6.53	1.29	0.5	64.7	35.4	8210	NA	171.7	21.64	12.94	y
350	Output_1_285	MTL	3.51	0.17	0.4	0.2433	0.007	0.0084	0.1058	0.0046	0.012	0.37286	0.34144	1402	36	43	1518	38	92	1706	220	1706	220	242	177	449000	477	9.6	0.7	54.5	38.9	8.2	165	100.5	10070	NA	163	19.4	24.2	n
351	Output_1_286	MTL	2.34	0.26	0.36	0.1767	0.0068	0.0076	0.098	0.011	0.015	0.22011	0.19869	1047	37	41	1164	82	110	1340	300	1047	41	84.9	42.1	439000	661	21.8	70.5	135.4	30.1	2.34	65.8	37.6	8360	NA	28.4	3.09	4.96	n
352	Output_1_287	MTL	1.57	0.19	0.25	0.1278	0.007	0.0074	0.091	0.011	0.014	0.29762	0.10731	773	40	42	916	76	100	1180	320	773	42	157.7	55.8	504000	296	25.5	0.24	21.4	17	3.99	112.6	53.1	10360	NA	27.4	2.74	5.69	n
353	Output_1_288	MTL	1.96	0.14	0.25	0.1929	0.0045	0.0057	0.0744	0.0055	0.0093	0.13867	0.19157	1136	24	31	1079	49	85	920	260	1136	31	101	98.3	458000	372	20.9	0	23.2	1.45	0.78	97.9	65.8	9540	NA	72.8	6.04	11.54	n
354	Output_1_289	MTL	3.64	0.17	0.42	0.2751	0.0067	0.0085	0.0988	0.0054	0.011	0.079977	0.39109	1565	34	43	1551	41	98	1550	210	1550	210	79.8	92	451000	462	11.9	0.023	19.84	1.9	1.53	110.7	73.6	8230	NA	97.1	10.49	12.77	y
355	Output_1_29	ORD	3.88	0.22	0.47	0.2979	0.0062	0.0095	0.0984	0.0052	0.01	0.28565	0.12025	1680	31	47	1589	45	96	1540	190	1540	190	153.2	134.6	4.52E+05	228	27.5	0.027	26.3	3.8	1.07	62.4	33.7	8520	765	146.4	16.2	21.8	y
356	Output_1_290	MTL	3.73	0.18	0.43	0.2789	0.0069	0.0086	0.0974	0.0044	0.011	0.21329	0.33568	1584	35	44	1565	38	90	1529	210	1529	210	114.7	113	446000	389	17.6	0	34.9	3.87	2.06	121	67.4	8230	NA	120.7	13.15	18.51	y
357	Output_1_291	MTL	2.53	0.26	0.37	0.2233	0.0086	0.0096	0.0828	0.0085	0.012	0.11357	0.20642	1296	45	50	1225	81	120	1060	320	1296	50	38	35.5	434000	360	19.5	0.066	60.3	9.88	3.01	202	88.7	6370	NA	30.5	2.77	4.92	n
358	Output_1_292	MTL	10.05	0.42	1.1	0.467	0.011	0.014	0.1572	0.0066	0.017	0.17013	0.32943	2465	47	61	2425	39	100	2404	190	2404	190	127	78.2	441000	202	12.2	0.012	25.1	1.81	0.64	46.1	21.86	8160	NA	139.7	24.5	32.1	y
359	Output_1_294	MTL	4.33	0.2	0.5	0.2945	0.0067	0.0087	0.108	0.005	0.012	0.26557	0.23011	1662	33	43	1685	38	94	1720	200	1720	200	102.1	163.2	447000	67	2.83	0.113	19.3	6.1	1.34	14.5	12.35	7820	NA	185	21.9	15.03	y
360	Output_1_296	MTL	4.32	0.18	0.49	0.3041	0.0067	0.0088	0.1043	0.0044	0.011	0.26327	0.34079	1710	33	44	1687	34	93	1662	210	1662	210	152.1	139.1	442000	191	20.3	0.013	39.3	2.18	0.78	40.2	19.76	8960	NA	162.8	18.9	26.4	y
361	Output_1_298	MTL	2.11	0.15	0.27	0.1898	0.0052	0.0063	0.082	0.006	0.01	0.07856	0.33417	1119	28	34	1140	47	85	1150	250	1119	34	93.3	94.4	431000	278	54.2	0.046	21.06	2.68	0.75	72.9	49.8	8970	NA	68.9	6.23	9.6	y
362	Output_1_299	MTL	2.194	0.087	0.25	0.1921	0.0035	0.005	0.0833	0.0034	0.0091	0.11244	0.374	1132	19	27	1172	28	78	1248	210	1132	27	127.8	319	444000	151	6.9	0.51	33	21.2	3.99	248.4	95.9	8510	NA	234.6	21.7	13.85	y
363	Output_1_30	ORD	1.85	0.17	0.26	0.1875	0.0065	0.0079	0.0769	0.0071	0.0098	0.22194	0.079611	1106	35	43	1048	68	100	950	280	1106	43	33.51	40.1	4.55E+05	221	13.7	0	8.27	1.19	0.228	86.5	38.3	9670	970	27.3	2.26	3.29	n
364	Output_1_300	MTL	3.14	0.18	0.37	0.2238	0.0064	0.0077	0.1027	0.0054	0.012	0.3618	0.088623	1300	34	41	1426	43	90	1610	220	1610	220	95.5	105.6	464000	459	12.2	7.49	38.3	54.1	10.01	114.4	37.6	8800	NA	89.1	10.18	11.54	n
365	Output_1_301	MTL	2.04	0.25	0.33	0.1875	0.009	0.0097	0.081	0.01	0.013	0.17685	0.19854	1104	49	53	1076	85	110	910	340	1104	53	67.9	25.85	453000	93	18.6	0.017	34.2	3.13	2.04	34.4	15.1	7440	NA	18.33	1.6	7.52	n
366	Output_1_303	MTL	3.16	0.18	0.38	0.225	0.0089	0.0098	0.1036	0.0061	0.012	0.33889	0.31985	1305	47	52	1428	46	94	1610	230	1610	230	208	111.4	423000	411	11.9	93	162	46	5.01	89.2	44.8	8650	NA	94.2	10.83	8.54	n
367	Output_1_305	MTL	2.32	0.12	0.27	0.2002	0.0053	0.0065	0.0843	0.0043	0.0095	0.31656	0.15901	1175	29	35	1204	38	84	1250	220	1175	35	106.9	170.3	436000	248	19.4	0	14.59	0.77	0.175	57.8	36.1	9380	NA	129.6	12.01	12.39	y
368	Output_1_306	MTL	1.78	0.16	0.24	0.1782	0.0071	0.0079	0.0727	0.0063	0.0097	0.24225	0.20018	1055	39	43	1016	56	88	830	290	1055	43	48.5	57.8	448000	273	27.3	0.012	10.3	4.69	1.09	82.8	32.1	8820	NA	39.6	3.14	5.1	n
369	Output_1_308	MTL	4.94	0.18	0.55	0.3061	0.0096	0.011	0.1164	0.0034	0.012	0.51259	0.35685	1718	48	55	1801	31	94	1883	200	1883	200	96.2	356	452000	479	13.1	1.02	39	55	10.3	129	53.6	10960	NA	415	53.9	16.8	y
370	Output_1_309	MTL	3.89	0.23	0.47	0.2759	0.0078	0.0093	0.1021	0.0065	0.012	0.04056	0.39983	1568	39	47	1589	50	100	1580	250	1580	250	57	73.5	447000	208	18.2	0.016	14.66	0.96	0.346	50.4	37.7	9130	NA	78.1	8.87	8.76	y
371	Output_1_31	ORD	4.42	0.23	0.53	0.3221	0.0083	0.011	0.1051	0.0052	0.011	0.4845	0.089851	1797	40	55	1703	46	100	1659	190	1659	190	94.6	124.7	4.53E+05	542	15.9	0.017	16.5	1.7	0.64	104.4	75.8	11300	1311	146.9	17	14.89	y
372	Output_1_311	MTL	1.86	0.2	0.28	0.1845	0.0061	0.007	0.0739	0.0083	0.011	0.02067	0.20431	1090	33	38	1030	77	110	810	320	1090	38	135	41.8	443000	307	38.7	0.066	84.2	9.97	2.57	61.4	22.81	7060	NA	29.4	2.37	15.23	n
373	Output_1_312	MTL	3.75	0.12	0.41	0.2576	0.0048	0.0069	0.1053	0.0034	0.011	0.25253	0.30987	1477	25	35	1576	25	88	1697	190	1697	190	310.1	396	424000	613	12.7	2.05	102.2	78.3	15.8	176.3	79.4	10330	NA	393	45.5	43.4	n
374	Output_1_313	MTL	4.29	0.15	0.47	0.286	0.0076	0.0093	0.1086	0.0036	0.012	0.43188	0.34022	1620	38	47	1684	29	92	1752	200	1752	200	373	224	434000	265	23	0.62	88	30.1	6.5	104.6	39.1	7800	NA	242.8	29.2	38	y
375	Output_1_314	MTL	2.24	0.16	0.28	0.1887	0.005	0.0061	0.0866	0.007	0.011	-0.077401	0.47665	1113	27	33	1169	51	91	1200	270	1113	33	136.2	75	455000	365	24	11.9	89.8	19.2	1.89	73	32.42	7710	NA	55.2	5.23	15.79	y
376	Output_1_315	MTL	2.21	0.17	0.29	0.1968	0.0048	0.0061	0.08	0.0056	0.0098	0.22192	0.15671	1157	26	33	1160	51	87	1100	250	1157	33	129	122.8	429000	336	13.5	0.009	42.7	2.85	1.34	86.9	55.6	8690	NA	92.3	8.13	14.88	y
377	Output_1_316	MTL	4.4	0.2	0.51	0.2851	0.007	0.0088	0.1108	0.0056	0.012	-0.0038784	0.46195	1615	35	44	1706	36	89	1792	200	1792	200	134.7	158.4	420000	222	7.5	0.182	32.2	10.9	2.26	61.2	30.7	9030	NA	173.7	21.7	21.6	y
378	Output_1_317	MTL	3.8	0.16	0.43	0.2743	0.0075	0.0091	0.0991	0.0036	0.011	0.46153	0.19742	1560	38	46	1588	32	87	1589	210	1589	210	88.5	264	435000	511	4.7	0.17	14.9	10	2.5	85.1	56.5	10520	NA	275.6	30.6	13.74	y
379	Output_1_318	MTL	2.23	0.21	0.32	0.2006	0.0062	0.0073	0.0804	0.0074	0.011	0.27487	0.01962	1177	34	39	1161	72	110	1030	300	1177	39	50.6	57.6	452000	293	25.3	0.0034	15.02	0.93	0.396	59.3	44.6	9570	NA	44.1	4.03	5.69	n
380	Output_1_319	MTL	1.96	0.2	0.28	0.1819	0.0063	0.0072	0.0765	0.0078	0.011	0.055868	0.33207	1076	34	39	1057	69	100	910	310	1076	39	51.9	56.3	457000	313	32.1	0	16.85	1.38	0.72	68.3	48.8	9000	NA	39.1	3.43	5.95	n
381	Output_1_32	ORD	3.62	0.19	0.44	0.2795	0.0072	0.0099	0.0996	0.0047	0.01	0.46301	0.010837	1587	36	50	1544	42	94	1565	190	1565	190	347.6	232	4.29E+05	462	24.5	1.45	97.2	40	12.8	179.1	75	9740	1683	235	25.8	34.3	y
382	Output_1_320	MTL	3.89	0.18	0.45	0.2904	0.0069	0.0088	0.0965	0.0043	0.011	0.31612	0.13911	1642	34	44	1605	40	99	1522	220	1522	220	81.8	110.2	454000	303	14.8	0.009	15.21	2.33	0.98	106.9	60.3	9030	NA	121.5	13.32	13.82	y
383	Output_1_322	MTL	3.94	0.19	0.46	0.2819	0.0076	0.0093	0.1007	0.0047	0.011	0.35217	0.22955	1599	38	47	1608	40	95	1589	210	1589	210	88.5	106.1	461000	183	15.2	0.149	10.32	2.38	0.38	70.6	34.6	9450	NA	113.8	12.96	14.04	y
384	Output_1_323	MTL	1.94	0.12	0.23	0.1889	0.0047	0.0059	0.0733	0.0042	0.0085	0.30719	0.10875	1114	25	32	1086	42	83	960	250	1114	32	104.7	124.9	442000	205	17	0.278	16.18	4.28	1.23	56.5	36.5	9290	NA	91.6	7.6	9.35	n
385	Output_1_324	MTL	3.76	0.16	0.43	0.2816	0.0072	0.009	0.0971	0.0045	0.011	0.26265	0.21928	1597	36	45	1579	37	97	1519	220	1519	220	108.1	114.7	467000	1090	18.7	0.94	38.4	3.62	1.46	96.7	54.4	8760	NA	122.9	13.29	17.56	y
386	Output_1_325	MTL	2.26	0.2	0.31	0.1897	0.0061	0.0071	0.0845	0.007	0.011	0.21629	0.22784	1118	33	38	1176	59	93	1200	270	1118	38	57.5	64.2	412000	234	47.4	0.015	15.69	0.83	0.53	48.6	37	8620	NA	46.7	4.54	6.36	y
387	Output_1_326	MTL	3.01	0.11	0.33	0.25	0.0048	0.0067	0.0868	0.0037	0.0095	-0.036557	0.46853	1438	25	35	1409	29	89	1326	220	1438	35	71.2	216.1	441000	315	14.9	0	16.29	1.54	0.8	81.7	46.7	9530	NA	204.9	20.8	10.28	y
388	Output_1_327	MTL	2	0.11	0.24	0.1911	0.0049	0.006	0.0755	0.0044	0.0088	0.15002	0.2344	1127	26	33	1110	37	79	1020	240	1127	33	131.3	123.2	444000	244	12.2	0.0078	55.1	1.2	0.68	63.6	47.6	9140	NA	89.4	7.78	15.13	n
389	Output_1_328	MTL	3.74	0.14	0.42	0.209	0.0066	0.0077	0.1284	0.0036	0.013	0.60548	0.30127	1222	35	41	1571	29	89	2069	180	2069	180	1040	401	444000	1031	48	3.74	214	243	61.8	508	98.1	10790	NA	312.6	46.7	29.7	n
390	Output_1_329	MTL	4.08	0.16	0.46	0.2994	0.007	0.0089	0.0981	0.0037	0.011	0.4823	0.16064	1686	35	45	1641	32	91	1555	210	1555	210	93	211	465000	173	5.6	0	11.57	0.73	0.045	47.6	34.3	10810	NA	241.3	27.4	16.03	y
391	Output_1_33	ORD	3.92	0.23	0.48	0.2999	0.0066	0.0098	0.0989	0.005	0.01	0.5242	-0.10309	1695	34	51	1598	46	96	1545	190	1545	190	149.7	183	4.45E+05	304	9	0.016	28.3	1.51	0.7	83.9	65.2	9690	1084	201	21.8	23.4	y
392	Output_1_330	MTL	10.29	0.38	1.1	0.4613	0.0094	0.013	0.1589	0.0055	0.017	0.38153	0.31265	2443	41	56	2450	35	100	2433	180	2433	180	170.2	110.7	463000	518	19.8	0.051	17.74	4.59	1.09	112.1	73.7	10550	NA	196.6	36.3	31.8	y
393	Output_1_331	MTL	4.29	0.21	0.5	0.2962	0.0062	0.0083	0.103	0.0047	0.011	0.23727	0.18041	1671	31	42	1678	39	93	1648	210	1648	210	89.9	135.9	456000	200	9.3	0.053	14.35	4.37	0.95	40.3	23.4	10400	NA	153.7	18.7	12.82	y
394	Output_1_332	MTL	3.78	0.22	0.45	0.2796	0.0075	0.0092	0.0977	0.0061	0.012	0.0055571	0.39711	1587	38	46	1576	49	100	1530	230	1530	230	55.5	80.8	449000	242	24.7	0.01	4.16	4.2	0.64	94.3	42.7	9110	NA	86.2	9.93	8.93	y
395	Output_1_333	MTL	4.36	0.15	0.48	0.3071	0.0072	0.0093	0.1017	0.0032	0.011	0.4003	0.21767	1724	36	46	1698	28	91	1634	200	1634	200	58.6	238.1	453000	501	6.86	0	4.42	0.8	0.208	89.2	59.9	10720	NA	277.8	33	10.3	y
396	Output_1_334	MTL	1.89	0.2	0.28	0.191	0.007	0.0079	0.0708	0.0076	0.01	0.071696	0.2531	1125	38	42	1045	69	97	780	300	1125	42	137.8	42.2	451000	1370	38.5	58	207	82	5.45	89.8	30.8	7210	NA	30.7	2.59	15.69	n
397	Output_1_335	MTL	1.77	0.16	0.24	0.1859	0.0068	0.0077	0.0705	0.0064	0.0096	0.18742	0.20823	1097	37	42	1025	59	91	800	280	1097	42	54.6	50.5	443000	363	28.9	0	15.8	2.56	1.36	91.7	52.2	8580	NA	35.7	2.88	6.2	n
398	Output_1_336	MTL	4.42	0.19	0.5	0.3091	0.0069	0.009	0.1033	0.0045	0.011	0.20794	0.35578	1735	34	45	1705	35	94	1640	210	1640	210	91	124.1	452000	254	14.3	0	11.25	1.01	0.261	55.9	32.3	9550	NA	146.7	17.85	16.35	y
399	Output_1_337	MTL	9.39	0.55	1.1	0.453	0.016	0.018	0.1481	0.0082	0.017	0.31944	0.27477	2400	70	79	2349	56	110	2290	210	2290	210	3.29	25.29	446000	228	13.2	0	5.94	0.51	0.373	44	28.98	8980	NA	43.3	7.61	0.9	y
400	Output_1_339	MTL	3.34	0.34	0.49	0.276	0.012	0.013	0.0893	0.0096	0.013	0.034006	0.32425	1564	62	67	1418	94	130	1130	340	1564	67	36.4	22.66	461000	337	26.6	0.273	19.73	2.29	1.25	55	31.7	8720	NA	23.6	2.46	5.81	n
401	Output_1_340	MTL	4.49	0.18	0.51	0.3224	0.0075	0.0096	0.1002	0.0042	0.011	0.23866	0.30002	1799	36	47	1719	34	95	1604	200	1604	200	56.5	144.8	455000	545	11.1	0.0016	2.11	1.13	0.213	85.8	59.8	10630	NA	178	21.1	10.18	n
402	Output_1_341	MTL	1.82	0.14	0.24	0.1853	0.004	0.0053	0.0724	0.0059	0.0094	0.041835	0.3102	1095	22	29	1036	55	94	840	290	1095	29	43.2	110.1	452000	241	2.94	0.03	7.59	1.38	0.45	80.3	53.4	8840	NA	78.2	6.58	4.43	n
403	Output_1_342	MTL	3.53	0.2	0.42	0.2789	0.0068	0.0086	0.0906	0.0051	0.01	0.30934	0.18589	1584	34	43	1516	46	97	1360	230	1584	43	62.9	100.6	451000	267	14.2	0	16.36	0.35	0.309	50.6	41.5	9660	NA	106.5	11.38	9.72	n
404	Output_1_343	MTL	11.67	0.3	1.3	0.4402	0.0078	0.011	0.1906	0.0042	0.02	0.53576	0.15706	2350	35	51	2572	25	100	2737	170	2737	170	253.2	343	425000	315	8.6	0.84	50.2	44.5	9.23	105.6	45.8	9590	NA	575	128.5	42.8	n
405	Output_1_344	MTL	3.41	0.19	0.41	0.2729	0.0071	0.0088	0.0905	0.0048	0.01	0.28302	0.21488	1554	36	44	1489	45	96	1380	240	1554	44	72.7	109.9	451000	410	14.2	2.5	18.4	5.1	0.306	72.9	45.1	9190	NA	113.2	12.13	11.04	n
406	Output_1_346	MTL	4.36	0.24	0.52	0.3039	0.0085	0.01	0.1024	0.0054	0.012	0.23415	0.25913	1715	40	48	1687	45	96	1620	220	1620	220	129.8	106	445000	369	21.8	0.113	16.5	11.9	2.63	149.7	60.5	8770	NA	122	14.8	22.48	y
407	Output_1_347	MTL	1.92	0.2	0.28	0.1913	0.0069	0.0078	0.0719	0.0074	0.01	0.041393	0.3246	1126	37	42	1041	73	100	780	330	1126	42	54	51.5	474000	364	29.1	0.009	16.96	1.58	0.9	81.6	55.6	9360	NA	37.5	3.22	5.76	n
408	Output_1_348	MTL	1.95	0.11	0.23	0.191	0.0033	0.0049	0.0734	0.0043	0.0085	0.23559	0.092262	1126	18	26	1093	37	77	970	230	1126	26	317.4	205.3	471000	215	9.5	0.021	25.15	2.5	1.64	34	16.76	9370	NA	150.9	12.99	36.1	n
409	Output_1_349	MTL	2.46	0.14	0.29	0.2233	0.0047	0.0063	0.0796	0.0047	0.0093	0.11888	0.24146	1298	25	33	1251	41	86	1120	240	1298	33	133.6	150.4	441000	476	14.8	0.029	32.1	3.24	1.62	162.4	91.9	7320	NA	128.4	11.8	17.1	n
410	Output_1_35	ORD	3.91	0.19	0.46	0.266	0.0079	0.01	0.1126	0.0045	0.011	0.58513	-0.033922	1518	40	52	1608	39	95	1808	170	1808	170	196.3	699	4.23E+05	1049	96.6	10.3	343	267	90.3	656	77.2	8060	4700	686	85.4	16.4	n
411	Output_1_350	MTL	3.82	0.16	0.43	0.248	0.012	0.013	0.1134	0.0044	0.012	0.64652	0.63871	1421	65	69	1586	35	94	1837	190	1837	190	186	320	434000	1119	31.3	1.13	103	75	19.4	321	109.6	10240	NA	288.1	37.9	14.8	n
412	Output_1_351	MTL	4.28	0.15	0.47	0.3096	0.0064	0.0087	0.1004	0.0037	0.011	0.33882	0.23925	1737	32	43	1687	30	94	1603	210	1603	210	267.3	257.6	432000	172	15.5	0.133	58.1	6.1	1.57	51.9	29.8	9060	NA	305	35.8	45.5	y
413	Output_1_352	MTL	2.04	0.1	0.24	0.1782	0.004	0.0052	0.0841	0.0047	0.0097	0.16235	0.326	1056	22	29	1122	36	82	1220	230	1056	29	146.9	196.3	444000	278	17.2	0.446	40.2	20	4.73	95	50.8	8630	NA	132.4	13.07	15.77	n
414	Output_1_353	MTL	3.42	0.2	0.41	0.2806	0.007	0.0087	0.0881	0.005	0.01	0.17465	0.22201	1593	35	44	1489	46	94	1320	230	1593	44	61	80.8	440000	211	6.4	0	11.51	0.46	0.354	41.8	44.7	10170	NA	88	9.02	9.73	n
415	Output_1_354	MTL	4.03	0.24	0.48	0.2951	0.0073	0.0092	0.0973	0.0055	0.011	0.21631	0.22306	1665	36	46	1620	47	97	1540	220	1540	220	79.7	96.3	452000	281	9.7	0	25.7	0.68	0.77	67.6	51.9	8950	NA	108.8	12.33	13.23	y
416	Output_1_355	MTL	2.25	0.3	0.39	0.2051	0.0079	0.0088	0.078	0.011	0.013	0.081578	0.23433	1200	42	47	1120	110	130	810	380	1200	47	31.1	37.5	460000	291	28.3	0	7.94	1.26	0.56	74.4	41.4	9170	NA	29.3	2.72	3.36	n
417	Output_1_356	MTL	3.62	0.19	0.42	0.2757	0.0077	0.0093	0.0953	0.0052	0.011	0.10729	0.37783	1568	39	47	1539	41	94	1490	220	1568	47	184	174.6	460000	528	7.6	1.12	32.2	9.1	1.93	129	88.7	9920	NA	183.8	20.3	23.4	y
418	Output_1_357	MTL	2.77	0.15	0.33	0.2302	0.0051	0.0067	0.088	0.005	0.01	0.21328	0.19818	1335	27	35	1340	42	94	1330	220	1335	35	96.4	161.8	444000	191	7.9	0.61	25.14	13	3.03	95	50.9	8820	NA	143.1	14.44	8.7	y
419	Output_1_358	MTL	4.29	0.25	0.51	0.3021	0.006	0.0083	0.1031	0.0061	0.012	0.066018	0.24643	1701	30	41	1683	43	91	1630	200	1630	200	93.8	139.7	468000	170	12.2	0	12.86	1.23	0.142	50.7	32.8	11210	NA	163.2	19.1	15.48	y
420	Output_1_359	MTL	2.02	0.24	0.32	0.1905	0.0076	0.0084	0.0777	0.0096	0.012	0.16625	0.1699	1122	41	45	1072	87	120	850	340	1122	45	35.9	38.1	460000	250	20.8	0	9.72	1.45	0.49	60.1	38.7	9170	NA	28	2.53	4.05	n
421	Output_1_36	ORD	3.25	0.21	0.41	0.2556	0.0055	0.0082	0.0972	0.0063	0.011	0.29992	0.097368	1471	29	44	1451	52	100	1470	210	1471	44	59.6	129.1	4.54E+05	254	6.7	0	11.55	1.08	0.086	85.4	53.1	10150	1047	119.9	12.84	8.16	y
422	Output_1_360	MTL	2.01	0.11	0.24	0.1912	0.0047	0.0059	0.0761	0.0042	0.0088	0.1871	0.25285	1127	25	32	1107	37	82	1020	240	1127	32	158.5	177.7	462000	305	8.5	0.02	55.2	1.77	0.79	76.6	62.1	10580	NA	132	11.39	17.6	n
423	Output_1_361	MTL	4.45	0.29	0.55	0.3069	0.0071	0.0091	0.1043	0.0062	0.012	0.27693	0.070546	1724	35	45	1695	53	100	1640	220	1640	220	127	98.6	461000	256	16.4	0	15.52	1.48	0.33	61.7	29.5	9830	NA	116.6	13.8	22	y
424	Output_1_362	MTL	5.06	0.19	0.57	0.319	0.012	0.014	0.1182	0.0046	0.013	0.579	0.54069	1778	61	68	1824	35	100	1898	190	1898	190	180	353	443000	760	20.7	1.5	83	89	18	255	83.2	10120	NA	423	56.3	30.5	y
425	Output_1_363	MTL	3.5	0.17	0.4	0.2593	0.0064	0.0081	0.0976	0.0045	0.011	0.33996	0.12751	1485	33	41	1512	40	94	1528	220	1528	220	118.6	138.9	450000	707	12.3	0.274	10.78	4.45	1.34	140.9	90.8	9980	NA	139.2	15.48	13.78	y
426	Output_1_364	MTL	3.92	0.16	0.44	0.292	0.0068	0.0087	0.0977	0.0043	0.011	0.14769	0.37606	1650	34	44	1608	34	92	1535	220	1535	220	131.5	183.7	456000	230	11.8	7.00E-04	16.1	1.3	0.35	63.4	41.2	9820	NA	206.2	22.7	21.66	y
427	Output_1_365	MTL	3.7	0.19	0.43	0.2692	0.0062	0.008	0.1003	0.0059	0.012	-0.013815	0.45695	1535	31	40	1562	42	94	1590	210	1590	210	97.9	107.3	479000	304	16.3	0.036	21.71	1.76	0.53	70.1	52.5	10150	NA	112.8	12.63	13.8	y
428	Output_1_366	MTL	3.58	0.18	0.41	0.2701	0.0059	0.0078	0.096	0.0045	0.011	0.29447	0.17668	1540	30	39	1532	39	93	1498	220	1540	39	184.4	201.1	450000	320	13.3	0.1	35.5	6.9	1.64	85.4	57.8	9540	NA	208.3	22.4	23.73	y
429	Output_1_367	MTL	3.61	0.21	0.43	0.2633	0.0081	0.0095	0.1011	0.0059	0.012	0.21383	0.24583	1504	42	49	1539	48	100	1580	230	1580	230	104.3	126.4	438000	256	117	0.175	25.5	9.6	2.4	56.6	37.9	9810	NA	128.8	14.62	10.71	y
430	Output_1_368	MTL	3.2	0.11	0.35	0.2522	0.0048	0.0068	0.0919	0.0034	0.0099	0.084771	0.39498	1449	25	35	1450	27	88	1432	210	1449	35	180.8	285	463000	219	8.5	0	16.8	1.56	0.77	49.9	36.4	9790	NA	278.4	28.6	26.42	y
431	Output_1_369	MTL	4.91	0.19	0.55	0.3217	0.0066	0.0089	0.1112	0.0048	0.012	0.10844	0.41116	1797	32	44	1794	32	95	1782	200	1782	200	229.3	232	457000	135	22.7	0.022	24.8	6.51	2.26	79.5	27.8	8850	NA	286	34.9	41.6	y
432	Output_1_37	ORD	3.75	0.26	0.48	0.2819	0.0066	0.0095	0.0989	0.0062	0.011	0.34388	0.048673	1599	33	48	1552	55	100	1530	210	1530	210	72.7	99.2	4.60E+05	840	13.8	1.16	17.9	2.92	0.51	63	46.5	10180	849	104	11.42	11.14	y
433	Output_1_370	MTL	4.99	0.24	0.58	0.3346	0.0087	0.011	0.1081	0.0049	0.012	0.34177	0.22959	1858	42	52	1803	41	98	1721	220	1721	220	83.1	97.2	446000	170	7.2	0	22.9	0.56	0.278	50.5	43	10690	NA	126.1	14.99	15.25	y
434	Output_1_371	MTL	4.41	0.14	0.48	0.2062	0.0055	0.0067	0.1555	0.0049	0.016	0.53102	0.27677	1213	31	38	1708	26	90	2387	180	2387	180	821	476	434000	1210	63.8	5.78	377	316	81.7	656	120.2	9320	NA	377	64.7	41.5	n
435	Output_1_372	MTL	3.69	0.18	0.43	0.2786	0.0067	0.0085	0.0961	0.0048	0.011	0.10233	0.33253	1583	34	43	1555	39	95	1490	220	1583	43	88.9	147.4	466000	226	12.8	0.024	18.2	1.37	0.66	56	37.4	9190	NA	157.8	16.88	14.13	y
436	Output_1_373	MTL	12.36	0.38	1.4	0.5068	0.0083	0.013	0.1753	0.0052	0.018	0.34012	0.18898	2641	36	54	2624	29	100	2592	170	2592	170	247.6	192.9	467000	348	21.8	0	4.91	3.34	0.178	74.6	30.7	10440	NA	377	73	66.1	y
437	Output_1_374	MTL	11.36	0.46	1.3	0.4577	0.0099	0.013	0.1783	0.0068	0.019	0.4183	0.22176	2434	46	61	2539	38	110	2610	180	2610	180	67.5	138.9	473000	175	10.3	0.0026	19.06	3.34	0.54	50.8	37.9	10020	NA	246.9	48.2	16.63	y
438	Output_1_375	MTL	4.28	0.16	0.48	0.2741	0.0068	0.0085	0.1118	0.0041	0.012	0.32341	0.37597	1560	34	43	1681	32	93	1822	200	1822	200	324	198.2	413000	197	12	0.73	65.3	29.6	6.78	89.3	29	8760	NA	209.1	25.6	36.6	n
439	Output_1_376	MTL	2.08	0.24	0.32	0.1862	0.0061	0.0071	0.0791	0.0093	0.012	0.11681	0.1878	1099	33	38	1081	83	110	930	330	1099	38	127.9	39.4	449000	160	33.5	0.023	53.4	8.63	4.11	88.2	31.9	7560	NA	27.99	2.44	14.39	n
440	Output_1_378	MTL	3.52	0.2	0.42	0.2693	0.0068	0.0085	0.0947	0.0058	0.011	0.028468	0.356	1535	35	43	1514	45	95	1480	230	1535	43	76.1	87.3	465000	239	13.8	0.049	26.69	0.73	0.387	41.6	36.9	9700	NA	90.1	9.24	12.08	y
441	Output_1_379	MTL	3.61	0.2	0.43	0.2749	0.008	0.0095	0.0945	0.0049	0.011	0.43555	0.095769	1563	40	48	1535	43	93	1458	220	1563	48	50.2	95.8	430000	330	7.4	3.52	28.5	9.4	0.39	109.2	59.6	8280	NA	101	10.37	7.99	y
442	Output_1_38	ORD	2.64	0.15	0.32	0.2372	0.0067	0.0088	0.085	0.0043	0.0086	0.53894	-0.059152	1370	35	46	1302	44	94	1252	200	1370	46	64.9	180.8	4.45E+05	91	7.5	0.048	7.05	1.82	0.72	23.3	37.8	10390	417	158	14.83	6.55	y
443	Output_1_380	MTL	2.14	0.1	0.25	0.1947	0.0052	0.0064	0.0795	0.0043	0.0091	0.05017	0.4542	1146	28	34	1151	33	81	1110	230	1146	34	115.1	198.6	440000	328	14.6	0.054	30.7	2.59	0.71	79.7	57.5	9670	NA	150	12.83	12.5	y
444	Output_1_381	MTL	5.35	0.18	0.59	0.2914	0.0082	0.0099	0.1327	0.0039	0.014	0.58238	0.41075	1654	39	46	1875	28	92	2127	180	2127	180	351	354	419000	1006	21	2.82	109.9	121.4	23.8	274	86.1	10350	NA	393	56.8	38.6	n
445	Output_1_382	MTL	6	0.32	0.71	0.3526	0.0089	0.011	0.1225	0.0067	0.014	0.20114	0.2652	1944	42	53	1964	46	100	1930	220	1930	220	80.6	90	446000	205	8.9	0	27.5	0.91	0.223	31.7	21.5	10260	NA	121.3	15.9	15.77	y
446	Output_1_383	MTL	2.12	0.18	0.29	0.1822	0.0044	0.0056	0.0837	0.0075	0.011	0.066565	0.20648	1078	24	30	1133	60	95	1130	270	1078	30	46.6	81.8	448000	889	24.2	18.8	51.9	34.2	1.5	204.7	83.8	7880	NA	56.8	5.15	5.14	y
447	Output_1_384	MTL	4.05	0.16	0.45	0.244	0.0061	0.0077	0.1189	0.0045	0.013	0.36815	0.33612	1406	32	40	1634	32	91	1910	200	1910	200	333	220.2	444000	429	16.6	2.44	56.1	53.5	12.89	204.7	67.4	9220	NA	206.4	26.3	30.16	n
448	Output_1_385	MTL	4.61	0.2	0.52	0.3036	0.0072	0.0092	0.1088	0.0047	0.012	0.25934	0.23849	1707	35	45	1738	37	98	1736	210	1736	210	129.3	179.9	446000	144	12.4	0.132	19.7	3.91	1.08	40.4	22.27	9640	NA	207.1	24.8	22.41	y
449	Output_1_386	MTL	2.341	0.09	0.26	0.1908	0.0046	0.0058	0.0877	0.0035	0.0095	0.24408	0.38502	1125	25	32	1218	27	79	1338	220	1125	32	126.2	305	437000	290	14	0.63	39.4	37.9	6.15	89.2	34.1	9570	NA	224.3	20.99	15.21	n
450	Output_1_387	MTL	4.11	0.18	0.47	0.2769	0.0078	0.0094	0.1051	0.0046	0.012	0.31614	0.353	1574	39	47	1645	36	94	1689	210	1689	210	189	128.5	440000	213	4.4	0.145	24.9	7.34	1.51	75.5	32.5	8300	NA	135.7	15.49	31.3	y
451	Output_1_388	MTL	3.89	0.23	0.47	0.2781	0.0065	0.0083	0.1	0.006	0.012	0.15328	0.20303	1580	33	42	1600	46	93	1560	220	1560	220	61.4	84.9	447000	295	16.4	0	19.84	1.03	0.46	64.1	47.8	9300	NA	89.4	9.61	9.66	y
452	Output_1_39	ORD	4.09	0.22	0.49	0.3016	0.0071	0.01	0.1014	0.0049	0.01	0.36447	0.15262	1697	35	50	1634	42	94	1632	180	1632	180	122.9	151.9	4.55E+05	227	7.8	0.106	29.3	3.08	1.47	64.7	41.2	10800	821	167.8	18.8	15.82	y
453	Output_1_390	MTL	2.65	0.23	0.36	0.191	0.0089	0.0096	0.101	0.0089	0.014	0.19891	0.24141	1123	48	52	1286	65	100	1490	280	1123	52	81	55.2	423000	161	68	24.6	48	16.9	2.15	40.8	32	8770	NA	38.7	4.24	3.2	n
454	Output_1_393	MTL	1.92	0.21	0.29	0.1943	0.0062	0.0072	0.0706	0.0076	0.01	0.14067	0.16186	1143	33	39	1038	74	100	710	310	1143	39	153.5	54.8	454000	236	37.9	0.07	79.2	10.23	2.61	80.1	31.1	7400	NA	40.5	3	17.42	n
455	Output_1_394	MTL	2.2	0.19	0.3	0.1857	0.0048	0.0059	0.084	0.007	0.011	0.15361	0.17547	1097	26	32	1146	61	97	1120	290	1097	32	60	74.3	438000	276	19.5	0	18.68	0.64	0.347	51.7	41.4	9330	NA	52.8	4.81	6.84	y
456	Output_1_395	MTL	4.03	0.16	0.45	0.2853	0.0065	0.0085	0.101	0.0042	0.011	0.14178	0.35522	1617	33	43	1631	33	93	1604	220	1604	220	113.6	119.7	440000	281	13.8	0.023	31	1.93	1.98	105.1	82.9	7590	NA	131	14.39	18.86	y
457	Output_1_397	MTL	2.2	0.11	0.26	0.1979	0.0051	0.0063	0.0795	0.0042	0.009	0.12015	0.2551	1163	28	34	1170	36	81	1160	220	1163	34	379.5	214.6	462000	373	32.4	1.27	82.5	22.5	6.51	194.8	94.1	8480	NA	161.2	14.16	40.8	y
458	Output_1_399	Areyonga	4.4	0.18	0.49	0.2947	0.006	0.0081	0.106	0.0038	0.011	0.41236	0.10399	1664	30	41	1709	32	90	1714	200	1714	200	95.1	292	4.44E+05	691	5.6	0.014	4	1.93	0.31	144.2	83.6	10360	NA	326	38.4	16.59	y
459	Output_1_4	ORD	3.71	0.16	0.43	0.2729	0.005	0.0082	0.094	0.0036	0.009	0.44072	-0.038547	1555	25	42	1562	35	94	1483	180	1555	42	227.9	220.3	4.49E+05	326	5.8	0.283	45.8	3.44	1.78	145.5	112.4	10420	1676	233.6	24.4	30.2	y
460	Output_1_40	ORD	5.19	0.31	0.64	0.3378	0.0076	0.011	0.1129	0.0054	0.011	0.51326	-0.046397	1880	38	56	1827	48	100	1813	180	1813	180	177	151.3	4.46E+05	236	23.3	0.236	17.5	11.8	2.57	131.6	46.3	9070	1256	189	23.9	19.9	y
461	Output_1_400	Areyonga	4.97	0.19	0.55	0.3213	0.0067	0.009	0.1106	0.0041	0.012	0.2448	0.28376	1795	33	44	1805	31	94	1791	190	1791	190	102.2	256.2	4.51E+05	682	8.8	0.56	8.08	6.05	1.42	133.8	77.1	10100	NA	314.5	38.2	17.53	y
462	Output_1_402	Areyonga	5.04	0.21	0.57	0.3217	0.008	0.01	0.1112	0.0047	0.012	0.33827	0.23847	1796	39	49	1815	36	99	1796	190	1796	190	67	190.4	4.28E+05	551	9	0	2.58	1.2	0.198	83.5	54.7	9010	NA	234	29.1	13.17	y
463	Output_1_403	Areyonga	3.72	0.26	0.47	0.237	0.014	0.015	0.1114	0.0047	0.012	0.7858	-0.016311	1365	76	80	1554	59	110	1799	190	1799	190	368	310	4.04E+05	651	27.8	3.28	31.5	31.5	7.04	165.2	68.2	8280	NA	275	34.2	20.5	n
464	Output_1_404	Areyonga	4.26	0.13	0.47	0.2744	0.0066	0.0083	0.1107	0.0036	0.012	0.38126	0.32954	1561	33	42	1684	28	96	1789	200	1789	200	405	410	4.10E+05	256	12	1.91	37.7	26	6.37	108.6	49.8	8700	NA	429	52	35.7	n
465	Output_1_407	Areyonga	4.59	0.18	0.52	0.308	0.0063	0.0086	0.1056	0.0038	0.011	0.44669	0.11568	1736	33	45	1739	34	95	1698	210	1698	210	125.8	266	4.26E+05	171	8.1	0.189	15.52	3.89	1.29	67.8	40.4	9280	NA	316	37	20.5	y
466	Output_1_408	Areyonga	1.3	0.35	0.37	0.155	0.013	0.014	0.061	0.017	0.018	-0.099451	0.42044	929	74	76	810	150	160	420	570	929	76	32.3	84	4.15E+05	187	15.9	0	1.88	0.68	0.42	26.8	15.7	7350	NA	48.2	3.15	3.28	n
467	Output_1_41	ORD	4	0.22	0.48	0.3017	0.0072	0.01	0.0991	0.0048	0.0099	0.39467	0.026678	1698	35	50	1615	44	96	1552	190	1552	190	79.7	132.7	4.53E+05	218	12.7	0.053	9.7	2.45	0.68	51	29.6	10710	654	148.5	16.16	10.92	y
468	Output_1_410	Areyonga	2.35	0.13	0.28	0.2103	0.006	0.0072	0.0794	0.0047	0.0093	0.01383	0.45823	1229	32	38	1215	39	84	1110	250	1229	38	69	167.5	4.29E+05	202	6.8	0.0038	8.22	0.95	0.69	62.9	61.3	8690	NA	136.6	12.02	9.16	n
469	Output_1_411	Areyonga	3.37	0.21	0.41	0.2519	0.0069	0.0084	0.0953	0.0059	0.011	0.28109	0.15651	1446	35	43	1476	50	99	1470	220	1446	43	42.8	96.2	4.32E+05	133	5	0	8.18	0.43	0.52	28.8	40.7	7990	NA	93.5	10.02	6.63	y
470	Output_1_412	Areyonga	3.22	0.32	0.46	0.159	0.016	0.016	0.1487	0.0079	0.017	0.8582	0.58629	943	88	90	1426	74	110	2291	210	2291	210	980	433	4.34E+05	702	27.2	13.4	123	132	25.7	211	62.2	9080	NA	234	39.1	29.8	n
471	Output_1_413	Areyonga	0.76	0.26	0.27	0.112	0.017	0.017	0.049	0.018	0.019	-0.15081	0.43156	680	100	100	570	140	150	130	800	680	100	99.8	136.4	4.35E+05	328.8	12.5	0.15	10.57	4.8	0.6	133	45.5	9660	NA	60.6	3.4	6.87	n
472	Output_1_414	Areyonga	4.03	0.11	0.44	0.2877	0.0066	0.0085	0.1005	0.0028	0.011	0.38571	0.45663	1628	33	43	1640	23	92	1624	210	1624	210	232.9	632	4.39E+05	133	5.25	0.0002	15.7	0.52	0.042	47.7	40.4	11520	NA	696	79.5	37.8	y
473	Output_1_416	Areyonga	3.65	0.17	0.42	0.2713	0.0067	0.0084	0.0964	0.0041	0.011	0.38534	0.1312	1552	32	41	1548	38	95	1510	220	1510	220	69.7	190.5	4.17E+05	146	22.2	0.412	5.35	5.1	1.66	69.5	35.9	7970	NA	199	21.7	10.67	y
474	Output_1_417	Areyonga	4.73	0.15	0.52	0.3163	0.0057	0.0082	0.1066	0.003	0.011	0.449	0.12019	1771	28	40	1765	28	93	1734	200	1734	200	208	264	4.42E+05	310	21.5	0.43	19.7	9.64	2.39	157	63.2	9340	NA	323	39.7	35	y
475	Output_1_42	ORD	3.69	0.2	0.44	0.2751	0.0058	0.0088	0.0995	0.0047	0.0099	0.31991	0.059427	1565	29	44	1554	40	90	1580	180	1580	180	281.2	271	4.49E+05	458	8.9	1.08	76.3	22.8	6.98	159.6	99.6	10890	1790	275	30.6	35	y
476	Output_1_420	Areyonga	4.72	0.22	0.54	0.3224	0.0089	0.011	0.1053	0.0048	0.012	0.40671	0.18332	1799	44	53	1758	41	100	1685	210	1685	210	64.9	164	4.36E+05	1070	6.3	6.5	20.7	6.3	0.81	62.3	52.9	7220	NA	199	24.5	13.7	y
477	Output_1_421	Areyonga	1.98	0.2	0.29	0.1923	0.0086	0.0093	0.072	0.0068	0.0099	0.28108	0.019388	1130	46	50	1063	73	110	840	310	1130	50	16.5	53.2	4.27E+05	420	8.6	0.015	3.92	2.34	1.67	232.5	153.2	7680	NA	39.3	3.33	2.03	n
478	Output_1_422	Areyonga	4.17	0.26	0.51	0.308	0.012	0.014	0.0975	0.0074	0.012	0.2243	0.30424	1730	61	67	1662	53	100	1540	240	1540	240	234	734	4.77E+05	1010	6	10	47	37	11.1	238	133.5	11640	NA	853	96	20.9	n
479	Output_1_423	Areyonga	3.9	0.2	0.45	0.248	0.013	0.014	0.1141	0.0062	0.013	0.45117	0.56757	1427	67	71	1606	40	93	1837	200	1837	200	341	369	4.51E+05	159	13.3	2.66	43.2	33.6	11.6	90	37.4	10550	NA	336	44.3	21.1	n
480	Output_1_424	Areyonga	3.23	0.16	0.38	0.188	0.013	0.013	0.1282	0.007	0.015	0.58557	0.72347	1104	68	71	1455	38	87	2030	210	2030	210	4330	703	4.10E+05	441	49.8	20.2	286	268	58	468	87	9020	NA	478	71.3	102	n
481	Output_1_425	Areyonga	3.78	0.16	0.43	0.278	0.007	0.0088	0.098	0.0035	0.01	0.56202	0.030453	1580	36	44	1579	36	93	1578	190	1578	190	121.8	502	4.23E+05	464	9.9	2.79	48.2	25.9	8.26	109.9	51.6	9850	NA	534	60.5	19.1	y
482	Output_1_427	Areyonga	2.82	0.22	0.37	0.193	0.014	0.014	0.1069	0.0037	0.011	0.87489	0.2225	1132	73	76	1334	54	91	1720	210	1720	210	247	368	4.49E+05	302	30.8	6.6	61.6	59.9	19.8	151	51.2	10190	NA	248	30.8	13.6	n
483	Output_1_428	Areyonga	3.26	0.17	0.38	0.1532	0.0087	0.0092	0.1581	0.0085	0.018	0.57628	0.50749	915	49	51	1454	43	96	2380	200	2380	200	2170	649	4.11E+05	677	47	30.1	179	129	30.3	356	78.9	9310	NA	358	66	52.2	n
484	Output_1_429	Areyonga	4.3	0.18	0.48	0.3125	0.0072	0.0093	0.1011	0.0046	0.011	0.096024	0.33785	1751	35	46	1695	37	100	1627	200	1627	200	118.7	140.7	4.32E+05	288	6.6	0	12.49	4.5	1.38	109.8	51.2	8120	NA	168.7	20	21.46	y
485	Output_1_43	ORD	4.71	0.24	0.56	0.3194	0.0068	0.01	0.1095	0.0051	0.011	0.44594	0.080283	1791	34	52	1751	42	97	1743	180	1743	180	176.2	148.9	4.68E+05	605	13.9	0.027	38.2	5.5	2.38	140.3	75.6	10160	1531	176.4	21.2	29.1	y
486	Output_1_431	Areyonga	4.06	0.19	0.47	0.2906	0.0058	0.008	0.1011	0.0047	0.011	0.26264	0.22873	1644	29	40	1632	38	94	1596	210	1596	210	132.9	170.9	4.27E+05	431	50.7	0.032	34.3	3.08	1.5	100.8	56.3	7970	NA	191.4	22.7	24	y
487	Output_1_432	Areyonga	2.95	0.23	0.39	0.211	0.013	0.013	0.1013	0.0055	0.012	0.73496	0.11848	1229	69	72	1369	62	100	1600	210	1600	210	299	291	4.47E+05	691	23.7	3.19	51.5	32.6	7.9	140.4	110	10830	NA	217.4	25.4	14.94	n
488	Output_1_433	Areyonga	4.6	0.19	0.52	0.3117	0.0076	0.0096	0.1066	0.0037	0.011	0.53939	0.073478	1747	38	47	1739	35	94	1716	200	1716	200	336	384	4.23E+05	790	22.3	1.46	21.8	24.9	5.78	208	85.8	9180	NA	460	56.6	38.3	y
489	Output_1_434	Areyonga	3.12	0.26	0.42	0.219	0.016	0.017	0.1035	0.0068	0.012	0.67259	0.52603	1268	89	91	1410	68	110	1650	240	1650	240	126	96.8	4.31E+05	245	9.8	0.3	22.3	5.9	2.26	66.5	39.9	8410	NA	78.4	9.53	14.3	n
490	Output_1_435	Areyonga	4.6	0.19	0.52	0.3094	0.0076	0.0096	0.1074	0.0039	0.012	0.44058	0.18565	1736	38	47	1738	34	93	1727	200	1727	200	196.8	281	4.21E+05	227	6.4	0.71	18	8.11	3.1	75.8	37.4	9140	NA	333	41.9	25.41	y
491	Output_1_436	Areyonga	2.1	0.14	0.26	0.1954	0.0059	0.0069	0.0771	0.0049	0.0092	0.18969	0.222	1149	32	37	1129	47	87	1040	270	1149	37	147.9	137.3	4.19E+05	1110	20.4	18.8	58	23.5	0.39	43.5	21.68	9100	NA	101.9	9.36	17.8	n
492	Output_1_439	Areyonga	1.91	0.15	0.25	0.194	0.0052	0.0064	0.0699	0.0054	0.0089	0.21721	0.071464	1142	28	34	1058	53	88	840	280	1142	34	163.3	81.1	4.35E+05	208	27.9	0.31	73.2	5.3	1.34	64.5	27.1	7330	NA	60	4.96	18.91	n
493	Output_1_44	ORD	4.74	0.3	0.59	0.3002	0.009	0.012	0.1158	0.0058	0.012	0.52967	-0.05257	1689	45	57	1748	50	99	1853	190	1853	190	205.6	201	4.31E+05	316	21.1	1.3	104	24.9	8.32	150.4	54.7	9780	1464	225	29.6	22.5	y
494	Output_1_440	Areyonga	4.22	0.17	0.47	0.3117	0.0069	0.009	0.098	0.0039	0.011	0.29663	0.35892	1747	34	44	1667	32	91	1550	200	1550	200	107.2	162.7	4.36E+05	153	13.6	0.0018	10.29	0.99	0.134	39.7	20.87	9730	NA	195.2	22.1	19.42	n
495	Output_1_441	Areyonga	2.91	0.14	0.33	0.1839	0.006	0.0069	0.1127	0.0044	0.012	0.5018	0.20657	1087	33	38	1372	36	88	1824	210	1824	210	652	473	4.16E+05	622	16.9	5.88	53.5	57.7	16.4	192	52.9	8860	NA	328	43.2	35.6	n
496	Output_1_442	Areyonga	4.55	0.25	0.54	0.3077	0.0076	0.0095	0.1054	0.0048	0.012	0.55221	-0.019072	1727	37	47	1722	44	97	1674	210	1674	210	140.9	345	4.14E+05	392	3.76	0.098	13.1	1.48	0.313	75.2	47.9	9910	NA	410	49.7	25.4	y
497	Output_1_443	Areyonga	4.95	0.2	0.56	0.3289	0.0079	0.01	0.1083	0.0043	0.012	0.3217	0.25746	1831	38	48	1801	33	92	1738	200	1738	200	98.9	329	4.23E+05	703	7.5	1.14	10.7	12.4	4.56	147	80.2	9560	NA	421	52.2	13.13	y
498	Output_1_444	Areyonga	2.269	0.086	0.25	0.2068	0.0037	0.0054	0.0783	0.0028	0.0084	0.38483	0.13234	1211	20	29	1196	27	78	1124	220	1211	29	224.8	680	4.27E+05	379	3.5	0.7	18.45	6.8	1.79	72.7	68	11030	NA	544	49	22.7	y
499	Output_1_445	Areyonga	3.92	0.22	0.47	0.2751	0.0091	0.01	0.1018	0.0054	0.012	0.3012	0.22929	1564	46	53	1598	46	98	1610	230	1610	230	190.8	119.1	4.14E+05	250	11.5	0.129	33.8	8.36	4.88	180.8	83.7	6860	NA	127.6	15	31.7	y
500	Output_1_446	Areyonga	4.13	0.2	0.48	0.3	0.01	0.011	0.099	0.0039	0.011	0.57474	0.17578	1685	50	57	1645	41	97	1580	220	1580	220	84.3	149.5	4.40E+05	260	11.2	0.44	10.11	3.74	0.94	84.1	44.6	8520	NA	170.1	19.4	14.79	y
501	Output_1_447	Areyonga	4.62	0.15	0.51	0.3107	0.0061	0.0084	0.1057	0.0028	0.011	0.50854	0.099229	1743	30	42	1747	27	92	1720	200	1720	200	198.2	583	4.31E+05	192	3.19	0.219	21.1	2.22	0.94	64.2	56.7	11240	NA	701	84.4	35.6	y
502	Output_1_448	Areyonga	1.814	0.083	0.21	0.1741	0.0052	0.0062	0.0753	0.0038	0.0085	0.12373	0.43184	1033	29	34	1048	29	73	1030	230	1033	34	41.2	242	4.12E+05	733	6.5	0	0.487	0.71	0.056	118.6	63.4	10120	NA	162	13.65	4.56	y
503	Output_1_449	Areyonga	3.18	0.16	0.37	0.203	0.011	0.012	0.1147	0.0062	0.013	0.56362	0.54528	1188	62	66	1438	41	94	1830	220	1830	220	525	261	4.21E+05	423	30.8	5.99	101	104	33.2	256	54.9	8390	NA	196	26	30.3	n
504	Output_1_45	ORD	3.88	0.21	0.47	0.2955	0.0072	0.01	0.0985	0.0051	0.01	0.46906	-0.011156	1667	36	50	1598	45	98	1539	180	1539	180	125.1	174.8	4.61E+05	234	11.3	0.015	21.8	0.98	0.41	73.2	57.4	11360	1010	192	20.9	18.6	y
505	Output_1_450	Areyonga	1.99	0.12	0.24	0.1982	0.0054	0.0066	0.0723	0.0043	0.0084	0.15199	0.27076	1164	29	35	1105	39	80	930	250	1164	35	255.3	139.3	4.16E+05	339	24.8	4.8	90.4	12.9	1.71	87.5	40.2	7130	NA	106	8.68	31.7	n
506	Output_1_451	Areyonga	4.3	0.21	0.5	0.2865	0.007	0.0088	0.1065	0.0039	0.011	0.65712	-0.17251	1622	35	44	1678	40	96	1721	200	1721	200	141	303	4.28E+05	687	9.9	2.67	23.9	20.2	6.2	125.1	66.9	9890	NA	331	39.5	14.22	y
507	Output_1_452	Areyonga	3.3	0.14	0.38	0.2619	0.0062	0.0079	0.0893	0.0034	0.0096	0.42064	0.10361	1498	31	40	1470	34	88	1388	220	1498	40	111.9	317	4.08E+05	187	3.52	0.012	20.8	1.43	0.312	112.7	59.8	7680	NA	314	32.2	18.13	y
508	Output_1_453	Areyonga	1.699	0.087	0.2	0.1487	0.006	0.0066	0.0816	0.0037	0.009	0.4651	0.35887	892	33	37	999	32	73	1202	230	892	37	880	351	4.01E+05	222	125	1.28	33.4	18.1	3.84	71.5	31	9070	NA	196.7	18.2	26.9	n
509	Output_1_454	Areyonga	4.05	0.14	0.45	0.2886	0.0083	0.0099	0.0999	0.0023	0.01	0.68365	0.077897	1632	42	50	1648	28	90	1625	210	1625	210	42.1	545	4.24E+05	331	6.1	0.34	7.4	3.27	0.88	64.9	11.28	11680	NA	595	67.3	8.3	y
510	Output_1_455	Areyonga	3.95	0.15	0.44	0.2785	0.0067	0.0085	0.1013	0.0037	0.011	0.37767	0.21449	1582	34	43	1614	32	92	1618	210	1618	210	164.9	316	4.32E+05	248	6.9	0.027	40.7	1.31	0.62	73.2	54.8	9760	NA	339	38.3	27.9	y
511	Output_1_456	Areyonga	3.16	0.13	0.35	0.2228	0.0079	0.009	0.1022	0.0033	0.011	0.64597	0.41527	1294	42	47	1439	31	89	1652	200	1652	200	627	533	4.53E+05	484	20	7	70.8	54.5	11.7	157	62.8	9230	NA	454	52	50	n
512	Output_1_457	Areyonga	4.19	0.16	0.47	0.2792	0.0068	0.0086	0.1076	0.0041	0.012	0.34857	0.33378	1586	35	44	1663	31	92	1740	190	1740	190	193	308	4.35E+05	204	13.7	0.93	19.9	14.2	3.66	126.9	58.4	9620	NA	335	39.2	26.8	y
513	Output_1_458	Areyonga	4.85	0.22	0.55	0.3259	0.0092	0.011	0.1066	0.0044	0.012	0.44908	0.23808	1816	44	53	1780	38	98	1705	200	1705	200	116	169.3	4.38E+05	370	18.1	0.0016	8.51	3.31	0.74	123.7	57	8670	NA	210.4	25.1	22.1	y
514	Output_1_459	Areyonga	4.91	0.2	0.55	0.3195	0.0086	0.01	0.1098	0.0044	0.012	0.34583	0.3601	1785	42	51	1793	35	97	1772	210	1772	210	55.8	225.5	4.25E+05	552	5.3	0	2.37	0.95	0.285	95.7	64.4	9590	NA	280	33.5	10.69	y
515	Output_1_46	ORD	3.81	0.22	0.47	0.2883	0.0073	0.01	0.099	0.0053	0.01	0.43607	-0.022884	1631	36	50	1581	48	100	1557	190	1557	190	97.8	126	4.66E+05	249	3.48	0	15.64	1.63	0.319	78.7	54.7	10140	1020	135	14.8	15.1	y
516	Output_1_460	Areyonga	2.4	0.16	0.3	0.1853	0.0055	0.0065	0.0918	0.0055	0.011	0.32204	0.15282	1095	30	35	1223	47	88	1400	240	1095	35	227	127.9	4.24E+05	1490	29.3	3.9	37.4	21.9	2.83	66.9	33.3	8890	NA	92.4	9.35	21.4	n
517	Output_1_461	Areyonga	1.72	0.19	0.26	0.0315	0.0032	0.0033	0.404	0.061	0.074	-0.023057	0.66201	200	20	21	1004	74	100	3840	280	3840	280	652	247	4.66E+05	299	17.9	11.4	98	113	21.8	135	34	11540	NA	29.3	12.7	15.5	n
518	Output_1_462	Areyonga	10.34	0.44	1.2	0.457	0.011	0.014	0.1618	0.0055	0.017	0.54737	0.04319	2422	49	62	2452	38	100	2453	180	2453	180	482	387	4.35E+05	354	5.1	1.48	35.2	9.6	0.81	149.6	57.2	9310	NA	683	122	124.7	y
519	Output_1_463	Areyonga	4.81	0.29	0.58	0.312	0.014	0.015	0.1103	0.0059	0.013	0.52482	0.23116	1746	70	76	1777	52	100	1780	210	1780	210	312	397	4.41E+05	369	19.2	0.135	20.2	10	1.13	219.3	84	9260	NA	470	57.6	57.8	y
520	Output_1_464	Areyonga	5.34	0.21	0.6	0.304	0.0072	0.0092	0.1262	0.0054	0.014	0.16886	0.44952	1709	35	45	1865	33	97	2024	190	2024	190	117.4	242	4.61E+05	717	18.6	0.45	5.97	7.9	1.3	161.9	72.5	10780	NA	285	39.2	20.5	n
521	Output_1_465	Areyonga	0.994	0.088	0.14	0.099	0.0035	0.004	0.0703	0.0053	0.0089	0.45772	-0.082833	608	21	23	688	44	69	860	270	608	23	52.2	424	4.11E+05	97	151	0.54	4.88	3.02	1.03	19.2	5.77	10700	NA	160.9	12.4	2.05	n
522	Output_1_469	Areyonga	4.98	0.29	0.6	0.324	0.01	0.012	0.1113	0.0065	0.013	0.25171	0.18099	1807	49	57	1796	51	100	1780	240	1780	240	68.7	144.8	4.11E+05	193	18.8	0.35	9.67	1.31	0.35	53.1	32.4	8200	NA	181	22.3	15.8	y
523	Output_1_47	ORD	3.73	0.19	0.44	0.2838	0.0057	0.0089	0.0986	0.005	0.01	0.28156	0.15501	1609	28	44	1569	41	96	1556	180	1556	180	174.8	223	4.69E+05	288	10.5	0.083	30.2	2.19	0.66	76	55.8	11710	954	237	25.8	24.7	y
524	Output_1_470	Areyonga	5.05	0.2	0.56	0.3196	0.0071	0.0093	0.1147	0.0048	0.013	0.20652	0.34857	1786	35	45	1822	34	98	1838	200	1838	200	221.3	430	4.25E+05	323	15.2	0.031	15.93	1.97	0.34	92.9	49.2	10500	NA	535	66.6	41.8	y
525	Output_1_471	Areyonga	1.786	0.095	0.21	0.1109	0.0034	0.004	0.116	0.0049	0.013	0.64305	-0.11967	678	20	23	1029	35	79	1872	190	1872	190	1310	1120	4.04E+05	784	52.5	19.9	267	276	67.1	527	92.1	8790	NA	457	56.6	53.2	n
526	Output_1_472	Areyonga	4.5	0.22	0.52	0.3003	0.0087	0.01	0.1089	0.0052	0.012	0.31683	0.23729	1690	43	51	1716	41	97	1732	210	1732	210	144.5	298	4.23E+05	275	66	0.111	16.34	1.99	0.281	81.1	48.6	9150	NA	345	40.4	26.4	y
527	Output_1_473	Areyonga	4.18	0.13	0.46	0.2749	0.0087	0.01	0.1115	0.0035	0.012	0.43348	0.46789	1563	43	50	1669	26	93	1822	200	1822	200	276	489	4.25E+05	283	7	2.34	37.2	21.3	7.4	105	49.7	10270	NA	514	62.4	29.8	n
528	Output_1_474	Areyonga	5.54	0.27	0.64	0.3365	0.0091	0.011	0.1198	0.0059	0.013	0.27284	0.22193	1867	44	53	1898	40	95	1901	210	1901	210	66.9	136.5	4.29E+05	334	14.1	0	1.96	3.43	0.288	94.3	46.7	8430	NA	177.1	22.6	13.39	y
529	Output_1_475	Areyonga	3.65	0.23	0.45	0.2695	0.0085	0.0099	0.099	0.0068	0.012	0.073262	0.3768	1535	43	50	1535	53	100	1490	250	1535	50	54.7	74.1	4.23E+05	203	12.9	0.0012	12.89	0.69	0.223	50	38	8600	NA	77	8.2	9.28	y
530	Output_1_477	Areyonga	1.916	0.067	0.21	0.183	0.0042	0.0054	0.0765	0.0028	0.0082	0.25141	0.32117	1083	23	29	1082	23	73	1087	220	1083	29	169.4	509	4.07E+05	349	8.1	0	5.71	2.39	0.237	89.6	42.2	9270	NA	361	29.3	18.22	y
531	Output_1_478	Areyonga	5.15	0.21	0.58	0.3203	0.0081	0.01	0.1172	0.0049	0.013	0.26954	0.33943	1796	41	51	1834	35	96	1876	200	1876	200	113.6	213.4	4.38E+05	403	17.1	0.6	11.79	2.5	0.345	77.1	44.6	8830	NA	268	33.3	22.44	y
532	Output_1_479	Areyonga	4.68	0.14	0.51	0.2967	0.0074	0.0093	0.1152	0.0028	0.012	0.59862	0.27132	1679	35	44	1759	25	91	1871	190	1871	190	634	767	4.25E+05	671	11.3	3.61	57.7	47.7	10.58	218.3	98.2	10640	NA	870	106.9	64.6	n
533	Output_1_48	ORD	3.88	0.21	0.47	0.2828	0.0065	0.0094	0.1004	0.0049	0.01	0.34731	0.17044	1604	33	47	1592	41	93	1592	190	1592	190	108.9	155.8	4.69E+05	310	12.6	0	21.8	0.58	0.378	65	49.8	10890	882	164.1	18.4	16.51	y
534	Output_1_481	Areyonga	4.78	0.19	0.54	0.3021	0.0071	0.0091	0.1145	0.004	0.012	0.44628	0.18319	1700	35	45	1771	34	95	1855	200	1855	200	149.6	188.3	4.45E+05	288	10.4	0.045	15.39	2.77	0.75	87.4	41.1	9400	NA	223.6	27	26.7	y
535	Output_1_484	Areyonga	4.68	0.16	0.52	0.3074	0.0078	0.0097	0.1113	0.0041	0.012	0.23572	0.46442	1726	38	48	1756	29	93	1803	200	1803	200	140.7	215	4.27E+05	251	8.9	0.103	13.27	3.55	1.2	122.3	58.3	8300	NA	255	29.8	24.6	y
536	Output_1_485	Areyonga	4.51	0.23	0.52	0.3046	0.009	0.011	0.1092	0.0057	0.012	0.23052	0.28647	1711	45	53	1717	42	98	1745	200	1745	200	66.2	147	4.25E+05	404	11.8	0	6.53	0.76	0.195	68.4	46.1	9720	NA	175.9	20	12.91	y
537	Output_1_486	Areyonga	3.27	0.15	0.37	0.2337	0.0061	0.0075	0.1026	0.0042	0.011	0.40857	0.16752	1352	32	39	1463	35	89	1634	210	1634	210	517	243	4.09E+05	802	510	0.72	82.2	14.5	6.71	174.8	111.9	6800	NA	219	23.4	80.6	n
538	Output_1_487	Areyonga	2.77	0.26	0.39	0.2315	0.0075	0.0087	0.0884	0.0084	0.012	0.12436	0.21794	1340	39	45	1312	74	110	1200	300	1340	45	35	41	4.15E+05	259	9.5	0.016	7.1	2.61	1.11	86.5	41.7	7430	NA	36.9	3.3	4.93	n
539	Output_1_489	Areyonga	4.21	0.27	0.52	0.265	0.013	0.014	0.1176	0.0062	0.013	0.58203	0.20006	1509	68	73	1649	54	100	1863	210	1863	210	124	194	4.19E+05	238	12.1	1.12	25.6	9.5	2.31	73.6	38.7	8750	NA	202	24.8	22.2	n
540	Output_1_49	ORD	4.07	0.2	0.48	0.2925	0.0054	0.0088	0.1027	0.0048	0.01	0.34187	0.027506	1653	27	44	1632	40	95	1636	190	1636	190	90.3	151.9	4.68E+05	222	13.7	0	10.43	0.66	0.217	53.9	33.6	10200	695	168.2	19.1	14.34	y
541	Output_1_491	Areyonga	4.31	0.16	0.48	0.2835	0.0071	0.0089	0.1125	0.0037	0.012	0.48052	0.1422	1607	36	45	1698	30	90	1814	200	1814	200	161.9	396	4.31E+05	282	5.7	0.97	20.5	7.2	1.68	90	51.4	9770	NA	433	50.8	28.8	n
542	Output_1_492	Areyonga	9.11	0.38	1	0.431	0.01	0.013	0.1554	0.0061	0.017	0.34879	0.16916	2315	44	56	2336	38	100	2377	190	2377	190	61.8	316	4.33E+05	733	10.2	0.013	1.47	2.33	0.186	134.2	59.8	9780	NA	528	86	15.2	y
543	Output_1_494	Areyonga	3.22	0.12	0.36	0.1825	0.0045	0.0057	0.1284	0.0045	0.014	0.46178	0.31232	1080	25	31	1458	30	87	2059	200	2059	200	5.20E+03	678	4.88E+05	1440	61	1100	1360	800	50	255	62.6	11340	NA	480	65	40.6	n
544	Output_1_495	Areyonga	1.7	0.17	0.25	0.096	0.011	0.012	0.143	0.01	0.018	0.87733	0.65984	583	67	68	973	64	93	2190	210	2190	210	740	525	4.28E+05	810	28.9	8.9	219	152	38	553	108.4	8210	NA	189	26.5	52.9	n
545	Output_1_496	Areyonga	4.94	0.26	0.58	0.3049	0.0092	0.011	0.1212	0.0068	0.014	0.25683	0.27272	1713	45	53	1797	49	110	1920	210	1920	210	50.2	71.9	4.18E+05	338	22.1	0.243	7.07	8.59	2.78	172.2	67.4	7210	NA	85.9	10.83	9.57	n
546	Output_1_497	Areyonga	4.46	0.17	0.5	0.2993	0.0073	0.0092	0.1097	0.0042	0.012	0.28746	0.40251	1686	36	46	1715	31	93	1776	200	1776	200	112	174.3	4.45E+05	226	8.2	0.256	13.14	3.2	0.68	68.1	35.9	9790	NA	201.3	23.7	20.06	y
547	Output_1_499	Areyonga	4.6	0.13	0.5	0.3051	0.0072	0.0092	0.1097	0.003	0.011	0.47966	0.27565	1715	35	45	1749	25	95	1786	200	1786	200	119.3	578	4.21E+05	516	0	1.18	12.6	12.1	2.77	120.3	15.5	11120	NA	685	81	20.31	y
548	Output_1_500	Areyonga	4.59	0.28	0.56	0.2825	0.0075	0.0092	0.1192	0.0073	0.014	0.2129	0.16588	1602	38	46	1723	51	100	1860	220	1860	220	51.5	73	4.06E+05	441	68	3.6	21.6	3.6	0.325	67.3	52.4	9160	NA	80.5	10.14	10.07	n
549	Output_1_501	Areyonga	1.84	0.21	0.29	0.124	0.012	0.012	0.114	0.015	0.019	0.32619	0.60645	749	68	69	1040	76	100	1710	340	1710	340	483	231	4.68E+05	202	22.1	0.75	84.8	18.1	4.63	135	54.6	8830	NA	101.5	12.5	30.2	n
550	Output_1_504	Areyonga	5.85	0.53	0.81	0.228	0.014	0.015	0.195	0.021	0.029	-0.20079	0.59706	1322	73	76	1922	81	120	2650	280	2650	280	338	230	4.44E+05	203	31	1.92	66	27	6	99	47.9	8880	NA	193	42.3	49.6	n
551	Output_1_505	Areyonga	3.96	0.28	0.5	0.2671	0.007	0.0086	0.1078	0.0077	0.013	0.27514	0.15731	1525	36	44	1614	58	100	1720	220	1720	220	31	418	5.01E+05	367	6.6	0.54	6.85	4.2	1.63	67.5	22.8	13080	NA	424	48.9	5.16	n
552	Output_1_507	Areyonga	3.43	0.18	0.4	0.2532	0.0064	0.008	0.0989	0.0044	0.011	0.47005	-0.021318	1453	33	41	1497	41	93	1571	210	1571	210	75.6	183.5	4.36E+05	726	7.4	0.15	5.13	2.05	0.84	137.1	89.5	10170	NA	180.2	19.6	11.51	y
553	Output_1_508	Areyonga	2.37	0.15	0.29	0.1968	0.0057	0.0068	0.0872	0.0051	0.01	0.38099	0.11759	1157	31	37	1214	47	90	1290	260	1157	37	108.8	131.5	4.26E+05	185	11.4	0	38.1	0.48	0.227	41.3	35.3	9880	NA	100.3	9.48	13.8	n
554	Output_1_509	Areyonga	2.3	0.22	0.33	0.1937	0.0078	0.0086	0.0887	0.0091	0.013	0.012771	0.36844	1139	42	47	1178	74	110	1180	320	1139	47	74.9	53.8	4.45E+05	231	20.4	0.049	20.72	2.33	0.49	58.1	31.7	10160	NA	39.9	3.8	8.16	y
555	Output_1_51	ORD	5.49	0.32	0.67	0.336	0.0082	0.012	0.1194	0.006	0.012	0.51608	-0.067809	1865	39	55	1874	50	100	1891	180	1891	180	83.4	139.2	4.77E+05	204	13.3	2.5	15.1	9	0.77	114.5	46.3	9300	1165	174.9	22.9	15	y
556	Output_1_510	Areyonga	5.66	0.26	0.65	0.3458	0.0093	0.011	0.1209	0.006	0.014	0.20088	0.3821	1920	47	57	1918	42	100	1914	220	1914	220	77.8	74.7	4.48E+05	207	22.8	0.149	25	9.6	2.86	80.1	30	7620	NA	99.1	12.97	16.51	y
557	Output_1_511	Areyonga	3.94	0.16	0.44	0.2858	0.0068	0.0087	0.1	0.0036	0.011	0.49319	0.088297	1619	34	43	1611	34	93	1592	210	1592	210	71	222	4.43E+05	943	10.1	0	8.81	1.15	0.56	154.7	136.7	10840	NA	246	26.9	11.57	y
558	Output_1_512	Areyonga	3.72	0.31	0.5	0.234	0.015	0.015	0.1163	0.0068	0.014	0.7474	0.12045	1345	80	83	1528	76	120	1820	240	1820	240	117	92	4.52E+05	234	14.5	0.39	14.9	15.5	2.42	294	119	7170	NA	77.9	9.91	12.7	n
559	Output_1_513	Areyonga	4.37	0.18	0.49	0.3003	0.0061	0.0083	0.1058	0.0044	0.012	0.20169	0.23969	1691	30	41	1696	35	96	1704	200	1704	200	91.4	120.6	4.73E+05	220	12.5	0.03	13.95	0.91	0.23	54.2	32	10210	NA	141.5	16.41	15.5	y
560	Output_1_514	Areyonga	4.39	0.13	0.48	0.3041	0.005	0.0076	0.1044	0.003	0.011	0.295	0.27322	1715	23	36	1704	25	90	1694	200	1694	200	59.2	386	4.62E+05	362	8.4	0.64	2.5	1.56	0.137	47.5	27.1	12980	NA	457	52.4	9.53	y
561	Output_1_516	Areyonga	4.89	0.17	0.54	0.3221	0.0085	0.01	0.1117	0.0043	0.012	0.24009	0.40057	1798	41	51	1797	31	98	1794	200	1794	200	93.3	208.4	4.45E+05	287	14.8	0.045	10.33	1.06	0.161	55.2	34.6	9920	NA	260	31.6	18.44	y
562	Output_1_53	ORD	3.73	0.24	0.47	0.2802	0.007	0.0097	0.0981	0.006	0.011	0.36279	-0.011227	1590	35	49	1551	52	100	1500	200	1500	200	80.1	85.7	4.98E+05	291	18.5	0	17.3	0.9	0.47	87.9	60.1	10720	1098	89.9	9.72	11.33	y
563	Output_1_54	ORD	3.74	0.19	0.45	0.2758	0.0056	0.0087	0.1001	0.005	0.01	0.38285	-0.0099672	1569	28	44	1564	41	95	1573	180	1573	180	153.7	229	4.82E+05	258	5.1	0.016	26.6	0.88	0.39	86.1	67.6	11940	1123	232	25.8	22.1	y
564	Output_1_55	ORD	4.18	0.22	0.5	0.2944	0.007	0.0099	0.1062	0.0055	0.011	0.40866	0.056211	1662	34	49	1661	45	100	1681	190	1681	190	132	138.2	4.86E+05	350	15.1	0.051	30.8	2.58	1.6	91.7	58.7	9310	1082	150.1	17.8	20.2	y
565	Output_1_56	ORD	3.44	0.19	0.42	0.2292	0.006	0.0081	0.1093	0.0045	0.011	0.53643	0.052039	1329	31	43	1497	41	91	1763	170	1763	170	320	812	4.73E+05	617	93.6	14.5	352	120.7	21.5	223	68.6	11120	1930	704	87.1	20	n
566	Output_1_57	ORD	3.8	0.21	0.46	0.2719	0.0064	0.0092	0.1022	0.0054	0.011	0.28137	0.15426	1549	32	46	1573	44	94	1617	190	1617	190	102.9	119.8	4.94E+05	283	20.2	0	13.86	0.94	0.264	56.4	42.4	10210	781	123.1	13.94	14.59	y
567	Output_1_58	ORD	3.83	0.24	0.48	0.2614	0.0089	0.011	0.1074	0.0051	0.011	0.65165	-0.18843	1494	46	56	1575	48	97	1708	170	1708	170	264	251	4.77E+05	699	38.9	1.32	75.3	44.9	16	252	77.2	10060	2150	242	28.3	24.4	n
568	Output_1_59	ORD	10.9	0.58	1.3	0.473	0.01	0.015	0.1686	0.007	0.016	0.6071	-0.20392	2496	44	66	2493	46	110	2512	150	2512	150	268.7	171.1	4.84E+05	296	7	0.258	42.6	16	3.81	186.7	68.1	8950	1900	305	56.9	55.6	y
569	Output_1_6	ORD	4.37	0.19	0.51	0.2933	0.0054	0.0089	0.1035	0.004	0.0099	0.45369	-0.0032245	1657	27	44	1694	35	96	1653	180	1653	180	207.8	284.2	4.64E+05	220	12.7	0.63	32.5	19.7	6.23	103.5	43.5	9030	997	321	37	23.6	y
570	Output_1_61	ORD	4.09	0.22	0.49	0.2937	0.0064	0.0095	0.1035	0.005	0.01	0.49499	-0.15174	1658	32	47	1650	47	110	1648	190	1648	190	132.2	129.5	4.84E+05	299	8.7	0.087	22.1	4.09	1.74	126	70.4	9680	1468	143	16.4	16.46	y
571	Output_1_62	ORD	4.94	0.26	0.59	0.32	0.0064	0.01	0.1127	0.0055	0.011	0.2562	0.12401	1788	31	49	1790	43	98	1805	190	1805	190	68.2	110.5	4.94E+05	242	18.4	0.0072	6.6	0.95	0.38	55.6	36.5	10670	753	131.8	16.45	10.28	y
572	Output_1_63	ORD	3.62	0.22	0.45	0.27	0.0066	0.0093	0.0975	0.005	0.0099	0.43884	-0.022672	1539	33	47	1533	47	95	1530	200	1530	200	148.1	221	4.77E+05	835	5.9	0.7	29.6	14.9	6	193	116.1	11680	2130	224	24	18.6	y
573	Output_1_65	ORD	3.46	0.27	0.46	0.2807	0.0074	0.01	0.091	0.007	0.011	0.12153	0.18531	1593	37	50	1492	64	110	1320	250	1593	50	38.03	39.6	4.97E+05	374	15.8	0	20.6	1.65	2.09	82.3	68	8260	1068	42	4.15	5.68	n
574	Output_1_66	ORD	6.97	0.53	0.92	0.384	0.011	0.015	0.135	0.0099	0.015	0.19771	0.1896	2090	52	67	2073	64	110	2070	200	2070	200	42.9	70.1	4.89E+05	143	9.3	0	8.24	0.72	0.242	34.9	24.28	9830	496	101.2	14.7	8.22	y
575	Output_1_67	ORD	4.8	0.29	0.6	0.3177	0.0083	0.011	0.1098	0.0052	0.011	0.58746	-0.23962	1776	40	55	1762	49	98	1775	190	1775	190	85.2	100.6	4.92E+05	239	19.2	0.017	23.8	2.4	0.96	66	37.8	9390	776	119	14.5	13.57	y
576	Output_1_68	ORD	3.68	0.22	0.45	0.2709	0.0058	0.0087	0.0987	0.0052	0.01	0.28885	0.13349	1544	29	44	1547	45	94	1550	190	1550	190	131.6	161.6	4.93E+05	419	15.5	0.0041	15.23	1.82	1.19	116.6	74.7	9700	1376	163.8	17.7	19.06	y
577	Output_1_69	ORD	4.21	0.27	0.53	0.3014	0.0081	0.011	0.1024	0.006	0.011	0.40845	0.018688	1696	40	53	1650	52	100	1590	190	1590	190	71.8	81	4.67E+05	594	52	0.91	14.4	3.91	0.72	96.7	63.6	10660	1165	90.8	10.18	11.34	y
578	Output_1_7	ORD	3.46	0.18	0.41	0.2474	0.0052	0.0079	0.0977	0.0048	0.0099	0.27504	0.14748	1424	27	41	1502	41	95	1523	190	1523	190	289	275	4.59E+05	1218	28.2	1.77	82.5	40.5	15.2	291	189.5	11790	2970	266	28.8	25.6	y
579	Output_1_70	ORD	3.28	0.21	0.41	0.2411	0.0065	0.0087	0.0982	0.0055	0.01	0.43844	0.076798	1396	33	44	1452	49	95	1530	200	1530	200	281	222	4.61E+05	535	18.5	2.21	111.2	40.7	13.4	193	105.4	10840	2000	200	21.7	26.3	y
580	Output_1_72	ORD	4.37	0.26	0.54	0.2976	0.0079	0.011	0.1082	0.0065	0.012	0.29603	0.095402	1677	39	52	1689	51	100	1690	190	1690	190	50.8	58.5	4.94E+05	138	17.9	0	11.32	1.28	0.356	41.6	24.03	10400	535	65.1	7.71	7.74	y
581	Output_1_73	ORD	4.01	0.2	0.48	0.2843	0.0061	0.0092	0.1023	0.0048	0.01	0.3838	0.0046625	1611	31	46	1619	42	97	1616	180	1616	180	108.2	139.2	4.73E+05	274	16.8	0	27.7	1.14	0.47	67.8	51.8	10070	891	146.5	16.41	15.42	y
582	Output_1_74	ORD	3.94	0.22	0.48	0.2784	0.0066	0.0094	0.1026	0.0049	0.01	0.45263	-0.047536	1582	33	47	1605	42	92	1622	180	1622	180	161.1	258	4.89E+05	215	7.4	0.072	27.4	3.1	1.03	103.1	75.1	12020	1284	270	30.4	23.5	y
583	Output_1_75	ORD	4.35	0.28	0.55	0.2899	0.0064	0.0095	0.1073	0.0063	0.011	0.29027	0.078769	1640	32	47	1684	54	100	1710	210	1710	210	84.1	88.8	4.78E+05	127	16	0	8.73	0.78	0.109	34.1	20.63	12680	479	97.2	11.57	13.06	y
584	Output_1_76	ORD	2.33	0.15	0.29	0.1966	0.0043	0.0064	0.0849	0.0051	0.0091	0.24104	0.12214	1156	23	34	1201	45	86	1230	220	1156	34	116	145.5	4.74E+05	179	21.3	0.0044	13.67	1.86	0.37	82.9	49.6	10960	1001	109.1	10.08	12.2	y
585	Output_1_77	ORD	1.98	0.13	0.25	0.1865	0.0042	0.0062	0.077	0.0045	0.0082	0.55228	-0.23277	1101	23	33	1097	47	89	1030	220	1101	33	144.9	154.2	4.83E+05	211	14.6	0.011	31.9	1.12	0.45	61.1	47.7	10830	793	108.4	9.2	14.8	y
586	Output_1_78	ORD	3.66	0.22	0.45	0.2691	0.0069	0.0095	0.0983	0.0056	0.01	0.30147	0.17907	1534	35	48	1549	49	100	1530	200	1530	200	107.8	133.9	4.69E+05	1490	10.6	1.17	24.4	4.79	0.78	62.9	48.3	10940	823	137	14.9	14.2	y
587	Output_1_79	ORD	3.72	0.22	0.46	0.2589	0.0082	0.01	0.1041	0.006	0.011	0.28279	0.20602	1482	42	53	1554	47	98	1620	200	1620	200	314	158.6	4.86E+05	369	20.1	0.61	77	15.5	6.7	179	102.9	10550	1970	156	17.6	24.2	y
588	Output_1_80	ORD	4.78	0.3	0.59	0.3027	0.0098	0.012	0.1134	0.0071	0.012	0.18566	0.51017	1710	47	58	1764	52	100	1810	210	1810	210	146	144	4.68E+05	310	15.2	0.41	14.5	8.2	3.5	98	46.9	10710	1067	161	20.4	16.2	y
589	Output_1_81	ORD	3.76	0.19	0.45	0.2727	0.0065	0.0092	0.098	0.0046	0.0098	0.28486	0.13042	1553	33	47	1576	41	97	1550	190	1550	190	96.4	125.1	4.76E+05	244	15	0.0036	19.6	0.74	0.321	66	51.6	10350	883	132	14.11	13.63	y
590	Output_1_82	ORD	3.89	0.22	0.47	0.2709	0.0066	0.0093	0.1006	0.0049	0.01	0.35478	0.11637	1544	33	47	1592	43	94	1597	200	1597	200	137.5	202.8	4.70E+05	232	10.9	0.015	25.7	0.82	0.23	70.1	56.8	11410	926	209	23.6	20.1	y
591	Output_1_83	ORD	2.1	0.18	0.29	0.1854	0.0043	0.0062	0.0803	0.0069	0.0099	0.17725	0.071803	1095	23	34	1125	61	98	1050	260	1095	34	53.6	65.1	4.83E+05	217	21	0.0057	14.39	0.81	0.311	49.4	33.5	10010	647	46.7	4.07	5.23	y
592	Output_1_85	ORD	2.38	0.13	0.29	0.1524	0.0047	0.006	0.1104	0.0056	0.011	0.43975	0.16564	913	26	33	1222	37	83	1753	170	1753	170	965	533	4.11E+05	1450	114.3	9.11	812	214	77.5	828	212.7	8030	6660	310	37.6	66.1	n
593	Output_1_86	ORD	2.64	0.15	0.32	0.192	0.0044	0.0064	0.0966	0.0054	0.01	0.33283	0.12246	1132	24	34	1294	41	88	1490	190	1132	34	211	160.9	4.53E+05	191	187	29.5	48.7	28.4	3.35	57.8	28.5	10090	645	119.4	12.63	23.9	n
594	Output_1_87	ORD	4.01	0.24	0.49	0.2732	0.0059	0.0088	0.103	0.0058	0.011	0.28941	0.052158	1555	30	45	1614	48	98	1600	200	1600	200	199	165	4.47E+05	422	8.3	0.304	49.5	8.3	3.13	128.8	87.7	8730	1500	171	19.4	21.5	y
595	Output_1_88	ORD	5.31	0.3	0.65	0.3226	0.0074	0.011	0.1151	0.0058	0.012	0.36855	0.041533	1801	36	52	1848	46	100	1825	180	1825	180	74.2	155.2	4.72E+05	140	13.7	0	4.84	0.79	0.152	41.4	28.3	10570	588	192.9	24.4	12.57	y
596	Output_1_89	ORD	3.94	0.2	0.47	0.2783	0.0061	0.0091	0.0988	0.0048	0.0099	0.3057	0.16405	1581	31	46	1613	43	100	1559	200	1559	200	95.9	133.9	4.62E+05	254	14.3	0	20.8	0.79	0.37	66.3	54.7	10660	923	144.4	15.62	14.53	y
597	Output_1_9	ORD	4.28	0.21	0.51	0.2923	0.0061	0.0093	0.1035	0.0051	0.01	0.32428	0.19741	1657	29	44	1680	41	99	1634	180	1634	180	75.1	106	4.69E+05	182	16.6	0	9.58	0.94	0.31	43.6	28.32	9830	581	119.3	13.62	11.24	y
598	Output_1_90	ORD	3.75	0.21	0.46	0.2651	0.0055	0.0085	0.0974	0.0048	0.0098	0.45049	-0.090312	1515	28	43	1562	46	98	1529	200	1529	200	92.8	99.7	4.80E+05	224	14.5	0.024	43.9	2.64	1.79	94.6	62.1	9430	1110	101.2	11.15	13.43	y
599	Output_1_91	ORD	3.56	0.18	0.42	0.2725	0.0056	0.0086	0.0909	0.0041	0.009	0.40569	-0.0038611	1552	28	44	1532	41	95	1409	200	1552	44	171.8	236	4.86E+05	241	10.7	0.43	32.9	1.35	0.309	71	66.4	11440	1022	246	25.1	24	n
600	Output_1_92	ORD	4.89	0.24	0.58	0.3184	0.0063	0.01	0.1071	0.005	0.011	0.34102	0.014337	1780	31	48	1792	42	100	1717	180	1717	180	115.6	155.4	4.68E+05	387	63	2.33	14.8	5.8	0.61	111.6	57.3	9720	1268	190	22.6	19.9	y
601	Output_1_93	ORD	4.69	0.29	0.58	0.3021	0.0068	0.01	0.1078	0.0058	0.011	0.4491	-0.032536	1700	34	49	1741	50	99	1698	190	1698	190	88.6	120.6	4.73E+05	143	10.2	0	32.1	1.03	0.87	52.2	37.1	9700	686	139.5	16.8	13.81	y
602	Output_1_94	ORD	4.34	0.25	0.53	0.2972	0.0066	0.0098	0.1012	0.0049	0.01	0.50936	-0.083697	1676	33	48	1680	46	98	1592	190	1592	190	146.9	161.3	4.65E+05	141	10	0.189	28.7	4.18	1.71	61.9	37.7	10410	767	182.6	20.5	20.25	y
603	Output_1_95	ORD	4.71	0.27	0.57	0.3127	0.0065	0.0099	0.104	0.0052	0.011	0.39572	0.022131	1753	32	49	1750	45	97	1658	180	1658	180	185.1	240	4.70E+05	191	15.2	0.502	43	7.5	2.43	76.9	46.5	10150	935	288	33.5	28.4	y
604	Output_1_96	ORD	4.04	0.24	0.49	0.2831	0.0057	0.0089	0.0983	0.005	0.01	0.40428	-0.02738	1605	28	44	1628	45	94	1567	180	1567	180	112.7	119.4	4.88E+05	146	15.3	0.126	14.16	3.48	1.19	50.8	30.29	10340	634	129.4	14.4	11.24	y
605	Output_1_98	ORD	3.62	0.2	0.44	0.2595	0.0069	0.0093	0.097	0.0044	0.0096	0.56273	-0.15927	1485	35	48	1536	42	92	1522	180	1522	180	359	490	4.40E+05	639	43	4.12	160	83.9	26.8	304	103	10990	2740	480	51.3	38.6	y
606	Output_1_99	ORD	3.88	0.2	0.46	0.2778	0.0057	0.0088	0.0975	0.0045	0.0097	0.38913	0.04711	1579	29	44	1594	40	93	1529	180	1529	180	246.4	284	4.68E+05	369	8.6	1.08	85	16.3	4.72	234.8	109.5	8960	2400	300	32.5	31.6	y
607	s171006_0	Mcdills25	0.8	0.5	0.51	0.086	0.013	0.014	0.114	0.059	0.061	0.30744	-0.87443	526	76	80	660	140	140	310	760	526	80	607	1270	412000	700	-12	-0.0197	28.9	-0.0072	1.6	157	108	13300	NA	352	28.7	24.6	n
608	s171006_10	Mcdills25	2.71	0.2	0.32	0.2209	0.0072	0.013	0.0829	0.0059	0.012	0.16202	0.24335	1285	37	67	1312	57	93	1170	320	1285	67	7.17	129.7	443000	76	3.9	-0.000506	2.04	-0.0001802	0.012	5.65	17.87	9960	NA	100.2	9.55	0.76	y
609	s171006_100	Mcdills25	2.33	0.13	0.25	0.2098	0.005	0.011	0.0847	0.0048	0.012	0.12616	0.27337	1227	26	60	1208	41	78	1250	270	1227	60	125.9	185.4	484000	348	8.8	0.0039	24.4	1.08	1.37	87.1	65.7	11130	NA	151.3	13.9	14.24	y
610	s171006_101	Mcdills25	2.91	0.84	0.88	0.1174	0.0078	0.0096	0.169	0.034	0.04	0.97177	-0.90812	713	44	54	1200	160	160	2070	300	2070	300	521	910	470000	710	11300	5.3	57.8	20.3	2.68	175.9	57	11610	NA	410	76	75	n
611	s171006_102	Mcdills25	0.83	0.1	0.13	0.1008	0.0039	0.0062	0.0605	0.0076	0.011	-0.025208	0.29741	618	23	36	582	60	74	460	390	618	36	162	135.9	473000	210	9.8	0.55	40.1	6.9	2.04	59.2	21.12	9930	NA	53.8	3.56	8.93	y
612	s171006_103	Mcdills25	6.17	0.31	0.65	0.1273	0.0026	0.0066	0.365	0.013	0.05	0.62847	-0.14786	772	15	38	1984	43	90	3753	200	3753	200	1123	1800	453000	1315	35.3	2.1	380	63.1	30.2	449	122.2	11530	NA	901	359	351	n
613	s171006_104	Mcdills25	4.35	0.12	0.42	0.1578	0.0025	0.008	0.2095	0.0051	0.028	0.50516	-0.03451	944	14	44	1699	22	79	2891	220	2891	220	596	1296	530000	378	9.6	0.019	44.3	3.94	4.2	124.6	56.5	14200	NA	796	181.7	123.7	n
614	s171006_105	Mcdills25	4.81	0.12	0.46	0.3067	0.005	0.016	0.119	0.0029	0.016	0.32717	0.23978	1724	24	77	1782	22	81	1928	240	1928	240	682	479	484000	343	6	0.011	39.7	2.15	1.93	101.2	70.3	10200	NA	573	73.6	90	n
615	s171006_106	Mcdills25	4.56	0.17	0.45	0.2534	0.0068	0.014	0.1393	0.0074	0.02	-0.12858	0.68963	1454	35	72	1733	31	82	2163	250	2163	250	589	315	483000	504	19.3	0.115	67.1	6.64	4.12	166.3	113	11210	NA	315	45.5	48.5	n
616	s171006_107	Mcdills25	13.31	0.34	1.3	0.5265	0.0096	0.027	0.1922	0.0049	0.026	0.22857	0.44429	2725	40	110	2697	24	90	2756	210	2756	210	149.9	223.1	487000	277	5.3	-0.00055	16.77	2.43	0.85	120.7	64.2	10230	NA	460	95.4	38.88	y
617	s171006_108	Mcdills25	7.8	0.25	0.76	0.4053	0.0081	0.021	0.1465	0.0045	0.02	0.26937	0.42484	2191	37	97	2207	27	83	2296	220	2296	220	247	327.3	479000	413	4.6	0.064	12.07	4.42	0.69	115.9	51.3	11240	NA	516	81.7	44.2	y
618	s171006_11	Mcdills25	1.7	0.26	0.3	0.1026	0.0071	0.0086	0.11	0.018	0.023	0.18231	0.19295	627	41	50	920	110	120	1390	440	627	50	230.2	76	503000	299	11.9	0.237	32.2	3.29	2.63	82.7	24.7	12080	NA	28.1	3.54	9.26	n
619	s171006_110	Mcdills25	1.29	0.07	0.14	0.0952	0.0017	0.0049	0.1027	0.0053	0.014	0.32949	-0.042556	586	10	29	833	31	61	1610	280	1610	280	696	1047	521000	606	29.6	0.181	29.3	9	2.26	171.7	60.8	13920	NA	391	43.4	39.9	n
620	s171006_111	Mcdills25	1.82	0.087	0.19	0.1854	0.0034	0.0095	0.0755	0.0039	0.011	0.1602	0.2282	1096	18	52	1049	32	70	1020	280	1096	52	259.9	366.9	475000	750	6	8.9	40.8	22.6	0.38	99.1	54.6	11470	NA	266.9	21.7	26.24	y
621	s171006_113	Mcdills25	1.856	0.074	0.19	0.1729	0.0031	0.0089	0.0822	0.0034	0.011	0.24489	0.31016	1028	17	49	1064	27	69	1222	260	1028	49	318.2	448.6	488000	378	7.5	0.01	11.54	8.4	1.63	353	149.1	8410	NA	303.6	26.9	27.13	n
622	s171006_114	Mcdills25	0.846	0.059	0.098	0.0965	0.0019	0.005	0.0666	0.0045	0.0098	0.24494	0.0049914	594	11	29	614	32	53	730	300	594	29	496	494.5	531000	246	4	0.088	36.4	8.7	2.81	149.8	52.7	13460	NA	185.5	13.39	21.87	y
623	s171006_115	Mcdills25	12.72	0.48	1.3	0.2552	0.0067	0.014	0.3781	0.0092	0.05	0.73414	0.076128	1463	35	72	2655	35	92	3822	190	3822	190	934	882	476000	486	21.1	0.204	92.1	8.9	8.27	300	126.9	10950	NA	865	353	311	n
624	s171006_116	Mcdills25	3.573	0.092	0.34	0.2721	0.0032	0.013	0.1001	0.0026	0.013	0.27017	0.2417	1551	16	68	1540	20	76	1610	250	1610	250	23.6	1201	475000	1006	6.6	-0.000538	2.11	-0.000162	0.167	95.3	192	12640	NA	1267	137.2	3.95	y
625	s171006_117	Mcdills25	1.69	0.11	0.19	0.1742	0.0039	0.0092	0.0747	0.005	0.011	-0.09711	0.42996	1035	21	51	990	42	74	940	330	1035	51	91.1	269.4	493000	295	17	-0.00056	4.01	1.43	0.049	71.3	41	9900	NA	184	14.7	8.96	n
626	s171006_118	Mcdills25	3.19	0.17	0.34	0.1008	0.0015	0.0051	0.24	0.012	0.034	0.52789	-0.2752	619	8.6	30	1441	40	81	3078	220	3078	220	857	1602	473000	690	6.3	4.5	107	17.7	4.2	165	96.2	12530	NA	634	163.9	170.3	n
627	s171006_119	Mcdills25	3.49	0.2	0.38	0.1664	0.0023	0.0083	0.1591	0.0083	0.022	0.15473	0.10795	992	13	46	1508	46	87	2397	240	2397	240	424	950	464000	1136	12.4	0.195	62.2	6.7	4.28	288	209.2	13350	NA	619	107.2	75.9	n
628	s171006_120	Mcdills25	2.16	0.16	0.26	0.1862	0.0046	0.01	0.0873	0.0067	0.013	-0.021148	0.39753	1100	25	55	1143	51	81	1260	310	1100	55	124.4	145.7	517000	246	6.7	0.016	10.09	1.32	1.71	98	50.9	12580	NA	105.8	9.88	7.73	n
629	s171006_121	Mcdills25	1.548	0.083	0.17	0.1581	0.0038	0.0085	0.0744	0.004	0.011	0.27372	0.080726	946	21	47	940	32	65	990	270	946	47	142	516	478000	594	5.2	0.051	3.53	3.09	0.162	165	80.7	12040	NA	315.7	24.9	13.5	y
630	s171006_122	Mcdills25	6.71	0.33	0.7	0.216	0.011	0.015	0.241	0.011	0.034	0.42952	0.34704	1257	61	83	2066	43	93	3093	230	3093	230	75	527	487000	573	5.8	-0.000533	5.7	0.3	0.83	75.9	95.5	12890	NA	426	110.4	49.3	n
631	s171006_123	Mcdills25	8.97	0.36	0.9	0.1518	0.002	0.0075	0.448	0.015	0.061	0.20265	0.11921	911	11	42	2323	37	95	4059	200	4059	200	145	936	509000	282	5.2	0.024	18.4	2.11	1.7	92.3	78.2	12620	NA	558	277	266	n
632	s171006_124	Mcdills25	0.657	0.035	0.07	0.0809	0.0016	0.0042	0.0626	0.0036	0.009	0.077857	0.23964	501.5	9.4	25	512	22	45	620	300	501.5	25	590	767	510000	286	4.1	0.073	26.3	11.8	5.73	252	126.6	9680	NA	240	16.1	24	y
633	s171006_125	Mcdills25	1.61	0.27	0.31	0.1671	0.0087	0.012	0.076	0.013	0.016	0.035238	0.28224	1002	50	68	870	110	120	590	430	1002	68	22.03	44.5	487000	229	12.6	0.015	4.12	4.77	2.76	150.9	59.6	8570	NA	29	2.25	2.08	n
634	s171006_126	Mcdills25	5.24	0.14	0.5	0.1157	0.0023	0.006	0.346	0.012	0.047	0.2166	0.46293	705	13	35	1859	21	78	3668	210	3668	210	941	1083	456000	720	16.3	2.06	140	15.9	9.1	236	114.8	11780	NA	490	180.9	184.9	n
635	s171006_127	Mcdills25	8.14	0.37	0.84	0.356	0.012	0.021	0.1741	0.0047	0.023	0.78753	-0.24559	1957	59	100	2239	42	95	2591	230	2591	230	434	335.6	495000	227	8.7	0.045	32.5	4.32	1.23	133.8	79.3	10230	NA	460	86.6	97.2	n
636	s171006_128	Mcdills25	5.49	0.27	0.58	0.3	0.012	0.019	0.1397	0.0054	0.019	0.6954	0.08824	1686	62	96	1881	45	94	2195	230	2195	230	128	247.3	491000	532	11.6	-0.000545	9.5	1.83	0.97	129.4	80.1	11870	NA	294	43.9	22.7	n
637	s171006_129	Mcdills25	3.47	0.17	0.36	0.261	0.0051	0.014	0.1016	0.0051	0.014	0.15775	0.2709	1494	26	69	1508	39	82	1600	270	1600	270	323	258.5	485000	323	11.2	0.197	37	2.13	1.05	86.1	70.2	11760	NA	263.3	28.7	26.9	y
638	s171006_130	Mcdills25	0.871	0.077	0.11	0.1025	0.0031	0.0058	0.066	0.0065	0.011	-0.13474	0.40911	629	18	34	620	43	62	620	340	629	34	247	250	483000	313	13	3.8	42.9	12.7	2.33	82	25.4	10320	NA	99.4	6.86	14.69	y
639	s171006_131	Mcdills25	1.03	0.1	0.14	0.099	0.0028	0.0055	0.0783	0.0075	0.013	0.16057	0.15927	608	16	32	697	51	70	980	360	608	32	90.6	190.4	530000	100	3.8	0.005	17.2	0.46	0.65	20	16.8	12350	NA	73.2	6.12	3.57	n
640	s171006_132	Mcdills25	0.697	0.074	0.098	0.091	0.0025	0.0051	0.0587	0.0065	0.01	0.054396	0.21879	561	15	30	520	44	58	360	330	561	30	224	244.9	490000	147	15.7	-0.000534	20.87	1.17	0.55	18.4	3.13	10620	NA	87.2	5.34	11.74	y
641	s171006_133	Mcdills25	2	0.1	0.21	0.1709	0.0028	0.0087	0.0887	0.0043	0.012	0.31776	0.17506	1017	15	48	1105	35	71	1352	270	1017	48	322	733	512000	756	7.6	2	25.6	4.8	3.45	236	157.5	14440	NA	486	46.4	14.8	n
642	s171006_134	Mcdills25	2.13	0.11	0.23	0.1413	0.0045	0.0081	0.1147	0.0051	0.016	0.5687	-0.053382	851	25	46	1148	36	73	1835	250	1835	250	75.5	352.6	521000	209	6.5	0.011	9.73	0.31	0.42	53.3	62.5	12460	NA	192	23.7	5.23	n
643	s171006_135	Mcdills25	1.484	0.073	0.16	0.1519	0.0028	0.0078	0.0751	0.0039	0.011	0.13591	0.17682	911	16	44	921	31	67	1010	300	911	44	71.1	482	490000	742	5	-0.000542	1.09	0.83	0.065	162.8	111.2	11880	NA	283.4	22.9	5.83	y
644	s171006_136	Mcdills25	3.66	0.24	0.42	0.2812	0.0078	0.016	0.0994	0.0072	0.015	-0.18491	0.51296	1595	39	78	1538	53	92	1510	310	1510	310	59.2	125.5	484000	261	10.2	-0.000541	6.58	0.66	0.238	76.2	49.6	10740	NA	137.3	14.4	8.82	y
645	s171006_137	Mcdills25	0.91	0.05	0.098	0.1023	0.0024	0.0055	0.068	0.0038	0.0097	0.086277	0.26243	628	14	32	651	26	51	790	300	628	32	71.5	583	484000	129	3.2	0.02	6.06	0.26	0.122	27.6	98.3	13550	NA	231.1	16.75	6.86	y
646	s171006_138	Mcdills25	2.87	0.2	0.33	0.2359	0.0072	0.013	0.0926	0.0061	0.014	0.29911	0.15588	1364	37	70	1349	53	89	1400	300	1364	70	53.5	85.5	494000	226	13.1	-0.00056	9.3	0.92	0.15	64.3	45.9	10960	NA	77.4	7.69	6.9	y
647	s171006_139	Mcdills25	19.43	0.38	1.8	0.5826	0.0073	0.029	0.2525	0.0043	0.033	0.43908	0.17485	2958	29	120	3060	19	92	3195	210	3195	210	806	751	484000	491	9.8	1.58	82.2	6.1	1.9	75.8	69.2	10470	NA	1691	458	203.7	y
648	s171006_14	Mcdills25	3.53	0.26	0.42	0.2531	0.0076	0.014	0.0933	0.0073	0.014	0.073149	0.28238	1452	39	73	1527	59	95	1410	300	1452	73	291	126.5	507000	395	19.4	0.043	64.3	2.91	2.34	163.2	101.6	11530	NA	114.3	12.5	23	y
649	s171006_140	Mcdills25	1.83	0.11	0.2	0.1835	0.0039	0.0096	0.0761	0.0045	0.011	0.037649	0.2875	1086	21	52	1051	37	70	1060	270	1086	52	145.5	329.5	488000	235	3.7	-0.000537	12.8	0.8	0.123	82.5	71.6	12200	NA	233.9	19.1	13.6	y
650	s171006_141	Mcdills25	0.74	0.048	0.084	0.0981	0.0025	0.0053	0.0575	0.0038	0.0084	0.19588	0.19975	603	15	31	555	29	50	430	330	603	31	61.3	396	495000	222	3.5	0.0036	8.09	0.069	0.24	33.9	26.8	13210	NA	149.8	9.2	3.3	y
651	s171006_142	Mcdills25	1.819	0.077	0.18	0.1753	0.0034	0.0091	0.0791	0.0036	0.011	0.070632	0.35308	1041	18	50	1045	28	68	1138	280	1041	50	411	473	493000	429	4	-0.000543	35.8	5.73	1.51	297	149.1	10480	NA	320.3	27	35.3	y
652	s171006_143	Mcdills25	4.9	0.21	0.5	0.3187	0.0067	0.017	0.1163	0.0052	0.016	0.27004	0.14102	1788	34	85	1795	38	90	1872	260	1872	260	125.6	233.9	467000	149	6.4	-0.000493	10.15	0.63	0.54	46.9	46	8770	NA	286	35.4	17.66	y
653	s171006_145	Mcdills25	4.92	0.23	0.51	0.3284	0.0085	0.018	0.1134	0.0048	0.016	0.42475	0.087229	1828	41	87	1791	41	90	1829	250	1829	250	116	168.7	484000	254	6.9	-0.000533	12.39	0.75	0.22	68.8	50	11300	NA	212	25.8	18.8	y
654	s171006_146	Mcdills25	1.052	0.062	0.12	0.1221	0.0028	0.0065	0.0653	0.0038	0.0093	0.20595	0.19042	742	16	37	721	30	56	700	310	742	37	215	525	483000	282	7.3	0.45	10.43	1.14	0.78	55.8	48.3	10900	NA	241	17	14.59	y
655	s171006_147	Mcdills25	2.516	0.075	0.24	0.2098	0.0034	0.011	0.0907	0.0026	0.012	0.35807	0.17111	1227	18	57	1272	22	72	1432	250	1227	57	68.9	763	498000	431	4.6	0.028	6.7	0.09	0.44	71.1	98.9	14650	NA	619	60.3	4.44	n
656	s171006_148	Mcdills25	4.25	0.19	0.44	0.2953	0.0068	0.016	0.108	0.0045	0.015	0.34648	0.22132	1666	34	78	1672	38	86	1740	270	1740	270	205.5	207.8	465000	1250	9.5	-0.000492	31.9	2.58	0.96	98.1	63.6	9800	NA	236.7	27.8	33.23	y
657	s171006_149	Mcdills25	2.76	0.14	0.29	0.2112	0.0045	0.011	0.0993	0.005	0.014	0.14214	0.37274	1234	24	59	1333	38	80	1570	280	1570	280	352	379	476000	827	6.9	1.05	30.7	10.8	2.57	187	109.2	10030	NA	302	32.6	18.7	n
658	s171006_15	Mcdills25	3.37	0.11	0.33	0.1663	0.0028	0.0085	0.1348	0.0045	0.018	0.13375	0.40057	991	15	47	1492	25	77	2150	230	2150	230	469	542.2	496000	541	16.4	0.31	131.1	14.8	7.56	235.8	104.8	12230	NA	323.4	51.2	47.9	n
659	s171006_150	Mcdills25	15.71	0.71	1.6	0.424	0.013	0.024	0.2768	0.0071	0.037	0.80503	-0.21828	2276	58	110	2843	44	100	3334	210	3334	210	573	455	531000	452	19.1	0.219	88.8	8	5.18	154.2	77.5	12290	NA	752	228	76.5	n
660	s171006_151	Mcdills25	4.45	0.26	0.48	0.1193	0.0019	0.006	0.281	0.016	0.04	0.43563	-0.11503	727	11	35	1700	49	93	3313	230	3313	230	481	1950	473000	1110	81	1.1	212	37.1	20.4	281	179.4	15140	NA	897	278	245	n
661	s171006_152	Mcdills25	0.812	0.074	0.11	0.0886	0.0021	0.0048	0.0712	0.0069	0.012	0.089983	0.18632	547	13	28	589	42	60	770	350	547	28	472	372	542000	255	14.1	0.137	26.7	13.8	3.09	173	47.1	11260	NA	126.8	9.57	17.7	y
662	s171006_153	Mcdills25	4.65	0.36	0.56	0.1487	0.0033	0.0079	0.234	0.017	0.035	0.62541	-0.39445	893	19	44	1720	67	100	2980	260	2980	260	911	833	472000	1450	21.1	1.2	173	22.9	13.6	443	147	12810	NA	475	133	120	n
663	s171006_154	Mcdills25	1.708	0.059	0.17	0.1595	0.0038	0.0085	0.0803	0.0029	0.011	0.19926	0.41212	954	21	47	1007	22	63	1174	260	954	47	261	902	479000	980	62	0.017	10.3	3.78	1.02	252	153.6	12460	NA	553	47.4	20.6	y
664	s171006_155	Mcdills25	20.72	0.67	2	0.438	0.012	0.024	0.3539	0.0057	0.047	0.81815	0.28936	2338	54	110	3117	32	96	3719	200	3719	200	1389	740	511000	511	28.9	0.27	191	15.1	11	270	106	13160	NA	1224	469.3	255.2	n
665	s171006_156	Mcdills25	3.21	0.19	0.35	0.2331	0.0041	0.012	0.1027	0.006	0.015	0.11026	0.21595	1350	22	62	1440	45	83	1600	280	1600	280	113.1	156.7	502000	297	44	0.84	20.1	3.7	0.86	83.4	52.1	12020	NA	141.2	15.61	13.31	n
666	s171006_157	Mcdills25	0.73	0.051	0.085	0.0931	0.0025	0.0051	0.0593	0.0041	0.0088	0.24628	0.12374	574	15	30	549	30	49	490	310	574	30	47.2	417	481000	262	7.5	-0.000511	5.57	0.36	0.37	38.7	23.1	12570	NA	148.5	9.48	2.93	y
667	s171006_158	Mcdills25	27.24	0.67	2.6	0.654	0.01	0.033	0.3104	0.0072	0.041	0.37938	0.12244	3240	39	130	3387	25	96	3520	220	3520	220	132	151.6	516000	181	5.3	-0.000542	10.48	3.73	2.04	81.2	57.4	10310	NA	384	128	26.4	y
668	s171006_159	Mcdills25	1.113	0.072	0.13	0.1231	0.0024	0.0064	0.067	0.0039	0.0096	0.40846	-0.024405	748	14	37	756	35	62	770	330	748	37	106.1	349.6	486000	286	10.3	0.004	3.39	1.01	0.37	88	57	10070	NA	165.2	12.13	7.1	y
669	s171006_16	Mcdills25	1.225	0.091	0.15	0.0971	0.0024	0.0052	0.0857	0.0072	0.013	-0.090964	0.41828	597	14	31	796	43	69	1160	340	597	31	391	461	448000	232	8.5	0.014	39.4	1.29	1.62	90.8	61.7	10800	NA	159.1	15.8	19.5	n
670	s171006_160	Mcdills25	3.43	0.26	0.41	0.2492	0.0088	0.015	0.1035	0.0088	0.016	-0.15589	0.55015	1431	45	77	1478	60	94	1550	320	1550	320	68.9	96.2	462000	188	11.2	-0.000491	6.16	0.68	0.44	64.8	43.8	9310	NA	93.1	10.26	5.18	y
671	s171006_162	Mcdills25	0.841	0.052	0.094	0.0918	0.0019	0.0048	0.0692	0.0045	0.01	0.12174	0.18913	566	11	28	618	30	54	800	310	566	28	807	611	522000	357	8	0.299	60.6	22.9	8.35	323	82.5	10250	NA	214.7	15.99	35.6	y
672	s171006_163	Mcdills25	1.041	0.093	0.13	0.1127	0.0034	0.0064	0.0692	0.0061	0.011	0.36052	0.02167	688	19	37	722	46	66	780	300	688	37	88	165.3	502000	509	15.9	0.005	8.17	0.55	0.32	65.6	74.4	15680	NA	72.5	5.44	3.67	y
673	s171006_164	Mcdills25	5.26	0.11	0.5	0.1295	0.0024	0.0067	0.3023	0.0059	0.04	0.36892	0.42162	785	14	38	1863	18	79	3475	210	3475	210	1073	1949	422000	817	38.6	1.98	175.1	30.7	19.6	495	206.8	11060	NA	971	317.1	310.4	n
674	s171006_165	Mcdills25	0.725	0.034	0.075	0.0882	0.0015	0.0045	0.0613	0.003	0.0086	0.069408	0.33146	544.7	9.1	27	554	21	46	590	290	544.7	27	366	827	488000	354	5.9	0.049	6.74	8	1.92	193.5	131.6	9310	NA	281	18.52	18.13	y
675	s171006_166	Mcdills25	3.8	0.24	0.43	0.2778	0.0076	0.015	0.1012	0.0062	0.015	0.28695	0.14645	1578	39	78	1567	53	94	1580	290	1580	290	56.8	124.1	490000	271	10.9	0.0044	5.72	0.98	0.25	55.2	39.4	10490	NA	132.4	14.7	8.47	y
676	s171006_167	Mcdills25	1.69	0.17	0.23	0.1567	0.0058	0.0095	0.0816	0.0087	0.014	-0.011748	0.35364	937	32	53	979	67	91	1020	360	937	53	107.1	86.3	483000	230	5.7	0.059	19.19	5.84	1.87	81.7	45.1	9110	NA	52	4.52	9.79	y
677	s171006_168	Mcdills25	7.08	0.23	0.69	0.3661	0.0083	0.019	0.1422	0.0034	0.019	0.57106	0.21377	2009	39	92	2113	30	90	2249	230	2249	230	323	340	476000	274	5.6	0.019	32.1	4.66	2.54	111.4	64	10050	NA	479	74.3	57.7	n
678	s171006_169	Mcdills25	0.978	0.05	0.1	0.0995	0.0019	0.0051	0.0717	0.0038	0.01	0.070625	0.34064	611	11	30	686	26	53	930	310	611	30	149.8	486	505000	382	5.9	0.0041	5.68	2.13	0.61	118.8	54.4	10510	NA	187.3	14.57	9.16	n
679	s171006_17	Mcdills25	2.992	0.075	0.29	0.2216	0.0032	0.011	0.0903	0.0024	0.012	0.11614	0.40306	1290	17	59	1402	19	73	1416	260	1290	59	148.7	1062	5.00E+05	926	9	0.061	13.36	0.99	1.45	115.9	188.9	14010	NA	844	89.3	7.35	y
680	s171006_170	Mcdills25	4.67	0.15	0.46	0.2852	0.0059	0.015	0.1207	0.0036	0.016	0.41529	0.3258	1616	30	75	1760	28	85	1957	250	1957	250	145.1	440	486000	254	11.1	-0.000513	14.3	1.1	0.4	66.4	41.8	11120	NA	481	63.6	20.01	n
681	s171006_171	Mcdills25	0.89	0.13	0.15	0.0951	0.0029	0.0054	0.069	0.01	0.014	0.1385	0.049308	585	17	32	601	73	86	550	410	585	32	66.6	107	486000	123	8.4	0.016	15.56	2.23	0.61	29.6	14.69	10100	NA	39.5	2.93	3.47	y
682	s171006_172	Mcdills25	18.35	0.47	1.8	0.5366	0.0095	0.027	0.2515	0.0067	0.034	0.35209	0.29931	2767	40	120	3003	25	94	3182	210	3182	210	59.2	289.6	495000	159	7.8	0.061	6.68	0.18	0.46	24.7	9.53	9930	NA	601	162.7	11.85	n
683	s171006_173	Mcdills25	2.31	0.12	0.24	0.2064	0.0044	0.011	0.0818	0.0043	0.012	0.21358	0.14973	1209	23	58	1209	37	77	1216	270	1209	58	38.5	274	477000	134	2.54	-0.000467	3.83	0.104	0.262	23.3	27.3	10400	NA	219	19.6	4.5	y
684	s171006_174	Mcdills25	1.635	0.086	0.17	0.1579	0.0031	0.0082	0.0756	0.004	0.011	0.082182	0.22512	945	17	46	974	33	66	1030	300	945	46	417	410	522000	334	21.4	0.062	24.3	5.5	2.46	243	154.4	11340	NA	250.2	20.6	29.7	y
685	s171006_175	Mcdills25	1.418	0.097	0.16	0.15	0.0064	0.0096	0.0703	0.0048	0.01	0.43744	0.010427	899	36	54	888	43	72	830	300	899	54	111.3	275	502000	328	4.3	0.103	9.41	3.26	1.7	158.2	94.2	9500	NA	153.9	11.54	11.26	y
686	s171006_176	Mcdills25	0.693	0.062	0.089	0.075	0.0019	0.0041	0.0682	0.0066	0.011	-0.036956	0.35013	466	12	25	522	37	53	690	330	466	25	342.9	429	522000	658	7.8	0.45	29.7	12.5	8.7	311	90.7	11790	NA	124	9.05	12.03	n
687	s171006_177	Mcdills25	3.03	0.3	0.41	0.1139	0.0029	0.0062	0.192	0.017	0.031	0.55677	-0.31951	695	17	36	1365	74	100	2610	280	2610	280	611	617	477000	216	7	0.156	101.3	13.9	4.54	136.5	45.4	9890	NA	273.3	57.9	68.3	n
688	s171006_178	Mcdills25	1.07	0.12	0.15	0.1004	0.0025	0.0054	0.0772	0.0071	0.012	0.61807	-0.37864	617	15	32	722	54	70	950	290	617	32	57	620	490000	773	5.7	-0.000498	5.19	0.12	0.198	91.1	179.9	12360	NA	238	19.1	4.8	n
689	s171006_18	Mcdills25	0.85	0.13	0.15	0.1079	0.0043	0.0067	0.054	0.0087	0.011	0.064022	0.17427	660	25	39	587	81	95	160	400	660	39	104.4	97.5	453000	97	7.7	0.028	43.4	4.7	1.62	29.5	12.3	9510	NA	37.3	2.33	6.48	n
690	s171006_180	Mcdills25	2.04	0.1	0.22	0.1764	0.0051	0.0099	0.085	0.0049	0.012	0.27358	0.42227	1046	28	54	1118	36	74	1260	280	1046	54	120.6	332	476000	184	11.4	0.36	10.47	2.4	0.42	71.7	56.1	10000	NA	224.7	20.6	13.72	n
691	s171006_181	Mcdills25	1.6	0.11	0.19	0.141	0.0041	0.0079	0.0825	0.006	0.012	0.21023	0.19357	851	23	45	959	44	72	1160	300	851	45	182	182.2	545000	262	6.8	-0.000594	42.3	1.69	1.52	77.5	52.4	12270	NA	99.6	8.94	10.72	n
692	s171006_182	Mcdills25	3.491	0.098	0.34	0.2564	0.0049	0.013	0.0989	0.0027	0.013	0.26535	0.29537	1470	25	68	1521	22	75	1587	250	1587	250	58.9	974	470000	248	1.55	-0.000446	17.43	0.052	0.42	40.5	94	11910	NA	972	103.9	14.6	y
693	s171006_184	Mcdills25	5.23	0.24	0.54	0.3172	0.0074	0.017	0.1193	0.0054	0.017	0.15039	0.28659	1781	38	87	1852	36	81	1936	240	1936	240	133.6	181.6	488000	399	101	0.025	39.6	2.91	2.21	139.6	89.9	9170	NA	224	29.3	22.4	y
694	s171006_185	Mcdills25	1.447	0.079	0.16	0.1476	0.0034	0.0079	0.0701	0.0034	0.0098	0.348	0.19713	887	19	44	899	32	64	890	310	887	44	121.8	416	472000	289	6	0.0039	4.69	0.62	0.087	92.2	52.3	10360	NA	240	18.4	10.61	y
695	s171006_186	Mcdills25	1.96	0.1	0.21	0.1766	0.0038	0.0093	0.0807	0.0043	0.011	-0.0077731	0.38756	1048	21	51	1091	35	71	1160	290	1048	51	129.4	282.2	496000	234	5.1	0.019	11.54	1.22	0.68	82.1	61.1	9520	NA	193.8	16.69	11.36	y
696	s171006_187	Mcdills25	4.81	0.18	0.48	0.2487	0.0038	0.013	0.1403	0.0059	0.019	0.19071	0.26777	1431	20	65	1778	33	86	2195	250	2195	250	400	895	476000	403	10.4	0.027	75.7	5.9	3.08	129.2	97.9	11840	NA	869	134.1	89.6	n
697	s171006_188	Mcdills25	3.32	0.12	0.33	0.2335	0.0054	0.012	0.1021	0.0034	0.014	0.38995	0.23779	1352	28	65	1478	29	80	1638	260	1638	260	351	651	472000	660	10.5	0.121	19.2	5.8	2.32	225	90.4	10860	NA	592	66.2	19.4	n
698	s171006_189	Mcdills25	6.26	0.15	0.6	0.3143	0.0046	0.016	0.1431	0.0031	0.019	0.41634	0.29279	1761	23	77	2013	19	80	2256	230	2256	230	233	840	469000	536	10.6	0.045	12.6	2.27	2.2	133	51.2	11820	NA	1029	160.1	37.2	n
699	s171006_19	Mcdills25	3.69	0.23	0.41	0.2139	0.0036	0.011	0.1138	0.0064	0.016	0.043629	0.27725	1249	19	58	1549	48	86	1810	260	1810	260	245	593	457000	694	8.5	0.156	25	3.99	1.87	168.6	90.8	11560	NA	463	63.6	47.1	n
700	s171006_190	Mcdills25	0.899	0.054	0.099	0.1008	0.0022	0.0053	0.0645	0.0038	0.0093	0.15188	0.27273	619	13	31	644	29	53	680	320	619	31	113.8	391	486000	262	16.5	0.177	5.76	4.06	0.55	83.2	36.7	10350	NA	152.5	10.63	6.21	y
701	s171006_191	Mcdills25	29.94	0.62	2.8	0.699	0.012	0.036	0.31	0.0063	0.041	0.4833	0.39831	3413	44	130	3485	21	97	3514	200	3514	200	261.2	274.8	465000	310	45.1	0.16	42.2	3.34	3.38	151.6	87.5	8880	NA	755	253.1	70.7	y
702	s171006_192	Mcdills25	2.35	0.1	0.24	0.196	0.0043	0.01	0.087	0.0039	0.012	0.152	0.45637	1153	23	56	1220	31	73	1327	280	1153	56	187.5	417	492000	202	4	0.008	14.38	0.19	0.213	59.8	45	12290	NA	311	29.1	21.5	n
703	s171006_193	Mcdills25	21.7	1	2.2	0.62	0.016	0.034	0.252	0.011	0.035	0.5656	-0.092926	3103	64	130	3150	47	100	3179	210	3179	210	71.7	110.6	482000	150	6.1	0.012	8.99	1.67	0.72	60.6	38.5	10210	NA	264	72.2	21.6	y
704	s171006_194	Mcdills25	0.883	0.061	0.1	0.1011	0.0021	0.0053	0.063	0.0044	0.0094	0.053867	0.24227	621	12	31	633	32	54	600	320	621	31	218.6	412	488000	371	8.2	6.6	27.9	13.6	0.66	87.9	33	10210	NA	161.7	11.03	11.99	y
705	s171006_195	Mcdills25	3.33	0.36	0.47	0.254	0.01	0.016	0.095	0.011	0.016	0.038629	0.3969	1456	52	82	1422	89	120	1270	370	1456	82	46.4	41.2	488000	219	16.4	-0.000447	29.3	0.92	0.66	50.6	46.3	10960	NA	40.5	4.11	6.46	n
706	s171006_196	Mcdills25	1.831	0.071	0.18	0.1631	0.003	0.0084	0.0805	0.0031	0.011	0.26382	0.25992	974	17	47	1055	27	70	1174	280	974	47	192.3	458	503000	263	7.8	0.095	15.16	2.62	2.88	107	53.5	11880	NA	292	25.7	10.46	y
707	s171006_197	Mcdills25	1.004	0.046	0.1	0.0991	0.0018	0.0051	0.0732	0.0035	0.01	0.18946	0.17076	609	11	30	701	23	53	960	300	609	30	299	743	513000	583	5.6	1.57	18	8.2	1.02	145.4	79.5	14060	NA	285	22.5	15.99	n
708	s171006_198	Mcdills25	18.17	0.5	1.8	0.433	0.011	0.024	0.3025	0.005	0.04	0.74869	-0.0070422	2315	50	110	2992	27	95	3478	200	3478	200	1274	1458	496000	808	31	0.4	158	17.7	13	269	147.2	14500	NA	2460	812	224	n
709	s171006_199	Mcdills25	3.71	0.14	0.37	0.2734	0.006	0.014	0.0983	0.0042	0.014	0.06799	0.44812	1557	30	73	1572	29	78	1550	270	1550	270	103.9	277.2	493000	194	6.1	-0.000442	11.78	0.74	0.32	62.5	47.3	11070	NA	294.8	31.2	15.32	y
710	s171006_2	Mcdills25	5.78	0.66	0.85	0.2441	0.007	0.014	0.152	0.016	0.025	0.64985	-0.4275	1406	36	71	1850	100	130	2130	330	2130	330	219.3	368	522000	680	10.1	0.058	15.8	1.55	1.2	169.3	123.8	14870	NA	304	54.5	40.2	n
711	s171006_20	Mcdills25	22.5	0.7	2.2	0.617	0.015	0.033	0.2457	0.0076	0.033	0.33131	0.38325	3094	61	130	3197	31	96	3141	220	3141	220	177	159.3	488000	376	10.5	0.009	25.5	1.86	1.26	112.2	64.1	10800	NA	355.7	101.4	13.79	y
712	s171006_200	Mcdills25	3.49	0.13	0.35	0.251	0.0042	0.013	0.1001	0.0036	0.014	0.11417	0.28639	1443	22	66	1517	29	79	1596	260	1596	260	295	524	524000	208	5.6	0.168	25	0.9	1.21	79.5	75.5	13050	NA	509	55.8	23.6	y
713	s171006_201	Mcdills25	12.77	0.44	1.3	0.503	0.012	0.027	0.1839	0.0051	0.025	0.40426	0.26591	2625	49	110	2653	32	93	2674	230	2674	230	158.1	153.1	485000	372	48	0.026	57.8	2.75	1.02	106.8	73.1	10440	NA	296.2	59.5	39.2	y
714	s171006_203	Mcdills25	5.29	0.37	0.61	0.1842	0.0053	0.01	0.2017	0.0084	0.028	0.76551	-0.37732	1089	29	56	1840	55	91	2822	230	2822	230	147	385	488000	203	41	0.166	11.28	0.9	0.4	36.7	61.5	10610	NA	273.6	61.3	22.8	n
715	s171006_204	Mcdills25	2.01	0.11	0.21	0.1889	0.0041	0.0099	0.0762	0.0047	0.011	0.047227	0.28844	1114	22	54	1107	37	75	1030	300	1114	54	119.1	285	492000	340	6.7	0.53	12.25	2.91	0.75	85.7	56.2	9390	NA	209	17.4	12.02	y
716	s171006_205	Mcdills25	13.9	0.59	1.4	0.482	0.012	0.026	0.1981	0.0072	0.027	0.50655	0.22818	2530	53	110	2729	39	95	2788	220	2788	220	64.2	131	501000	345	5	0.96	35.3	3.2	0.66	38.7	32.8	11060	NA	254.3	54.9	15.3	y
717	s171006_206	Mcdills25	0.935	0.079	0.12	0.1066	0.0027	0.0058	0.0629	0.005	0.0097	0.2625	0.06769	653	16	34	655	41	60	570	320	653	34	286	235	496000	186	8.8	0.072	28.3	6.32	2.97	84.6	38.8	8520	NA	95.7	6.57	16.5	y
718	s171006_207	Mcdills25	8.78	0.39	0.9	0.355	0.012	0.021	0.1784	0.005	0.024	0.85757	-0.43081	1967	55	93	2319	39	91	2633	210	2633	210	71.3	441	508000	204	5.1	-0.000441	6.12	0.2	0.38	51	42.4	12590	NA	599	118.8	8.05	n
719	s171006_208	Mcdills25	3.497	0.095	0.34	0.249	0.0043	0.013	0.1011	0.0027	0.014	0.42888	0.11392	1433	22	65	1522	21	76	1627	250	1627	250	119	721	544000	501	5.5	-0.000443	7.27	0.32	0.77	67.2	114.2	14450	NA	687	76.3	8.07	n
720	s171006_209	Mcdills25	2.73	0.11	0.27	0.2046	0.005	0.011	0.0973	0.0039	0.013	0.45572	0.084496	1199	27	59	1329	29	74	1539	250	1539	250	210	1422	530000	409	9.1	0.18	13.9	0.75	1.09	93.8	41.8	14940	NA	1123	117.5	18.3	n
721	s171006_21	Mcdills25	1.083	0.082	0.13	0.0932	0.0019	0.0049	0.079	0.0057	0.012	0.30381	0.10596	574	11	29	731	39	61	1050	300	574	29	189	1002	448000	532	3.21	-0.00052	8.21	0.87	0.64	128.9	118.5	14360	NA	341	30.6	16.2	n
722	s171006_210	Mcdills25	1.719	0.066	0.17	0.1661	0.0031	0.0086	0.0747	0.0028	0.01	0.29186	0.16483	990	17	47	1010	25	65	1023	290	990	47	347	671	526000	485	5.6	0.049	20.9	3.03	0.77	161.3	100.2	10800	NA	429	35.1	28.6	y
723	s171006_211	Mcdills25	7.66	0.21	0.74	0.3608	0.0068	0.019	0.1529	0.0046	0.021	0.22844	0.50603	1985	32	88	2186	24	86	2370	220	2370	220	142.9	338	525000	277	8.1	3.8	32	5.5	0.53	93.5	56.3	10380	NA	467	78.4	24.1	n
724	s171006_212	Mcdills25	3.77	0.2	0.4	0.2783	0.0059	0.015	0.0982	0.0054	0.014	0.1199	0.30745	1587	28	70	1570	45	90	1560	260	1560	260	123.2	197.2	515000	325	15.4	0.104	16.5	1.47	0.32	71.6	54.9	11280	NA	209.3	22.5	18.1	y
725	s171006_213	Mcdills25	3.71	0.2	0.39	0.256	0.0067	0.014	0.1066	0.0062	0.015	-0.0073468	0.34499	1468	35	72	1571	47	94	1730	300	1730	300	374	252	568000	688	11.4	-0.00076	21.4	2.17	1.56	185.2	109.5	14010	NA	243.9	28.6	12.39	n
726	s171006_214	Mcdills25	1.28	0.058	0.13	0.1165	0.0027	0.0062	0.0797	0.0038	0.011	0.18084	0.33195	710	15	36	831	26	58	1137	270	710	36	305.6	482	525000	301	8.4	0.039	41.1	5.98	1.71	134.8	120.4	12390	NA	217.5	18.83	32.7	n
727	s171006_215	Mcdills25	2.64	0.13	0.28	0.182	0.01	0.013	0.1093	0.0066	0.016	0.44348	0.60643	1072	56	74	1303	37	79	1740	240	1740	240	333	1255	584000	660	9	0.014	27.9	1.74	2.73	138	176	15740	NA	870	101.1	26.8	n
728	s171006_216	Mcdills25	16.49	0.56	1.6	0.504	0.017	0.029	0.2345	0.0044	0.031	0.87086	-0.32317	2623	74	130	2895	36	110	3077	210	3077	210	235	514	556000	109	4.2	-0.000474	8.81	0.48	0.76	26.5	29.9	13640	NA	1010	262	6.64	n
729	s171006_217	Mcdills25	0.812	0.079	0.11	0.0879	0.0022	0.0048	0.0677	0.0068	0.011	-0.16694	0.35365	543	13	28	586	44	62	670	350	543	28	210.2	175.7	559000	415	23	0.41	12.32	8.8	3.43	315	137.4	9810	NA	59.7	4.39	8.89	y
730	s171006_218	Mcdills25	2.1	0.1	0.22	0.1825	0.0037	0.0095	0.0835	0.0041	0.012	0.28297	0.13716	1080	20	52	1140	33	72	1220	280	1080	52	210	378.4	525000	426	2.48	2.44	19.7	4.8	0.5	73.6	82.6	12120	NA	268.1	24.1	20.94	n
731	s171006_219	Mcdills25	1.65	0.17	0.23	0.0878	0.0035	0.0055	0.135	0.014	0.023	-0.038362	0.41234	542	20	32	958	67	89	2020	330	2020	330	419	121.9	571000	183	15.3	0.187	76.6	3.75	2.52	60.6	24.1	10760	NA	41.1	6.01	14.78	n
732	s171006_22	Mcdills25	0.946	0.04	0.096	0.1044	0.0022	0.0055	0.0611	0.0023	0.0083	0.3558	0.23057	640	13	32	672	21	51	616	320	640	32	210	1072	439000	119	3.3	0.005	12.92	0.23	0.68	48.4	29	13810	NA	410	29.3	7.55	y
733	s171006_220	Mcdills25	1.86	0.12	0.21	0.1637	0.0049	0.0093	0.0823	0.0049	0.012	0.37805	0.023735	976	27	51	1051	43	76	1170	310	976	51	184.8	271.9	561000	230	4.7	0.014	18.23	0.45	0.47	74.4	56.5	12820	NA	171.4	15.4	12.68	y
734	s171006_221	Mcdills25	5.77	0.3	0.61	0.1898	0.0035	0.0098	0.2184	0.0095	0.03	0.50102	-0.15079	1120	19	53	1923	46	93	2934	230	2934	230	694	1097	514000	659	14.8	0.289	73.1	13.6	4.95	349	135.9	11000	NA	805	193	179.6	n
735	s171006_222	Mcdills25	3.75	0.12	0.37	0.1258	0.0033	0.0069	0.217	0.0071	0.029	0.31077	0.47776	763	19	40	1577	25	77	2941	210	2941	210	1100	1088	587000	940	28.7	0.56	154	18.8	14.4	383	168	16240	NA	519	124.4	110.2	n
736	s171006_223	Mcdills25	3.31	0.14	0.34	0.2674	0.0051	0.014	0.0893	0.0037	0.012	0.24796	0.19536	1532	28	74	1475	33	80	1371	270	1532	74	172.5	179.9	537000	293	10.6	0.051	34.1	1.53	0.56	87.7	79.5	12550	NA	187.2	18.17	21.77	n
737	s171006_224	Mcdills25	2	0.11	0.21	0.0968	0.0026	0.0054	0.1516	0.009	0.022	-0.16979	0.57731	595	16	31	1111	35	71	2310	250	2310	250	600	984	546000	1050	19	4.4	193	29.4	11.2	338	130	11400	NA	363	61.2	62.6	n
738	s171006_225	Mcdills25	0.85	0.052	0.094	0.0965	0.0018	0.005	0.0637	0.0039	0.0092	-0.12107	0.34917	594	10	29	623	29	53	670	320	594	29	740	665	516000	487	9.8	2.7	65.2	12.8	0.9	195.7	87	12670	NA	249.4	17.6	34.8	y
739	s171006_226	Mcdills25	20.99	0.48	2	0.5521	0.0097	0.028	0.2754	0.0054	0.036	0.62523	0.3651	2832	40	120	3137	24	100	3330	210	3330	210	420	392	548000	215	7.8	0.0033	43.2	2.55	1.75	99	75.2	12310	NA	839	252.8	88.5	n
740	s171006_227	Mcdills25	3.025	0.085	0.29	0.1046	0.0023	0.0055	0.2101	0.0064	0.028	0.25853	0.41797	641	14	32	1410	21	73	2890	210	2890	210	1296	1440	541000	1260	58.1	0.92	356	43.6	23.8	427	260	15310	NA	584	133.8	124.1	n
741	s171006_228	Mcdills25	2.928	0.067	0.28	0.2301	0.0029	0.011	0.0918	0.0021	0.012	0.23662	0.34014	1334	15	60	1386	17	72	1451	260	1334	60	58.8	1354	551000	445	15	-0.000448	2.18	0.19	0.36	79.7	50.2	16300	NA	1209	120.6	4.28	y
742	s171006_229	Mcdills25	2.05	0.34	0.39	0.129	0.012	0.014	0.105	0.01	0.017	0.89817	-0.45174	774	70	78	1030	110	120	1520	340	1520	340	128	312	574000	159	2.3	0.049	13.2	0.56	0.98	45.2	34.4	13590	NA	169	20.3	3.86	n
743	s171006_23	Mcdills25	4.43	0.14	0.43	0.2785	0.0067	0.015	0.1087	0.0037	0.015	0.24326	0.32018	1582	34	75	1712	27	82	1753	250	1753	250	156	550	458000	204	6.2	0.019	4.31	0.54	0.36	47.2	19.6	13620	NA	564	71.2	20.1	y
744	s171006_230	Mcdills25	3.83	0.26	0.44	0.0865	0.0017	0.0045	0.315	0.017	0.045	0.37234	-0.092176	535	10	27	1573	54	92	3497	220	3497	220	2320	1148	565000	979	41	0.99	433	49.4	30.2	510	188	15360	NA	395	142	156	n
745	s171006_231	Mcdills25	0.965	0.061	0.11	0.1033	0.0025	0.0055	0.0677	0.0041	0.0098	0.27186	0.13106	633	14	32	677	32	57	770	320	633	32	637	509	542000	361	5.5	0.131	34.5	8.9	2.48	238	96	11550	NA	203	15.1	30.7	y
746	s171006_232	Mcdills25	5.19	0.23	0.53	0.3061	0.0067	0.016	0.123	0.0057	0.017	0.10954	0.32253	1726	35	84	1838	37	86	1970	250	1970	250	153.3	140.8	529000	315	11.5	0.26	53.1	6.72	2.13	119.8	67.5	10120	NA	167.1	22	23.9	n
747	s171006_233	Mcdills25	7.5	0.25	0.74	0.2292	0.0055	0.012	0.2364	0.0043	0.031	0.82716	-0.10962	1329	29	65	2165	31	93	3090	210	3090	210	1998	1355	505000	1083	41.5	1.04	376	42	26.5	550	216.5	13750	NA	1218	313	146.3	n
748	s171006_234	Mcdills25	0.837	0.049	0.092	0.098	0.0019	0.0051	0.0614	0.0035	0.0088	-0.059823	0.32069	603	11	30	611	27	49	590	310	603	30	245	599	593000	299	10.4	0.017	29.6	1.68	2.05	108.3	60.9	13860	NA	226	14.9	9.52	y
749	s171006_235	Mcdills25	4.91	0.15	0.48	0.3179	0.0054	0.016	0.1119	0.0033	0.015	0.30972	0.23717	1779	26	79	1802	27	85	1821	250	1821	250	115.9	374.7	537000	948	9.5	0.022	5.71	0.68	0.63	196.2	208.9	13590	NA	471	57.1	14.21	y
750	s171006_236	Mcdills25	5.1	0.19	0.51	0.3231	0.0071	0.017	0.1141	0.0043	0.016	0.13501	0.38085	1803	34	83	1827	32	86	1848	260	1848	260	536	320	542000	340	5.1	0.116	38.5	9.2	2.8	192	88.6	11870	NA	403	48.8	72.8	y
751	s171006_237	Mcdills25	15.31	0.35	1.5	0.5241	0.0093	0.027	0.2118	0.0038	0.028	0.54421	0.21531	2714	39	110	2830	22	93	2913	210	2913	210	444	401	544000	1190	7.7	0.63	60.9	6.8	3.46	104.8	81.7	10670	NA	829	189.4	85.3	y
752	s171006_238	Mcdills25	3.427	0.085	0.33	0.2544	0.0036	0.013	0.0977	0.0024	0.013	0.40648	0.28402	1461	18	65	1507	20	76	1568	250	1568	250	284	953	559000	1459	10.9	0.19	9.86	3.66	0.74	393	225.9	14160	NA	949	100.9	26.6	y
753	s171006_239	Mcdills25	18.28	0.77	1.9	0.531	0.014	0.029	0.251	0.01	0.034	0.55275	0.15628	2752	54	120	2989	43	100	3173	230	3173	230	325	269	596000	190	6.8	0.028	29.2	1.31	1.61	71.3	60	13860	NA	547	155	27.1	n
754	s171006_24	Mcdills25	3.38	0.33	0.45	0.2441	0.0075	0.014	0.0946	0.0098	0.016	0.057466	0.31971	1414	42	77	1471	79	110	1350	340	1414	77	53.8	66.1	440000	302	37.7	0.077	18.78	1.98	0.97	80.1	49.6	8450	NA	60.7	6.59	7.61	y
755	s171006_240	Mcdills25	7.01	0.87	1.1	0.1548	0.0072	0.01	0.312	0.029	0.05	0.92611	-0.83808	925	40	58	2000	120	150	3380	280	3380	280	746	737	589000	870	14.7	2.8	69	12.4	4.49	284	188.6	15720	NA	450	163	167	n
756	s171006_241	Mcdills25	1.386	0.092	0.16	0.1118	0.0066	0.0085	0.0921	0.0047	0.013	0.67328	0.18433	681	38	49	873	39	67	1425	270	681	49	659	923	590000	642	10	0.059	33.2	2.33	3.29	232	166.7	15330	NA	375	37.3	21.7	n
757	s171006_242	Mcdills25	1.84	0.1	0.2	0.1851	0.0037	0.0096	0.0724	0.0039	0.01	0.24867	0.1336	1094	20	52	1049	37	71	950	290	1094	52	306	329	541000	428	4.9	0.054	22.3	2.99	0.62	183	105.6	12300	NA	236.3	18.5	27.8	n
758	s171006_243	Mcdills25	2.48	0.22	0.32	0.1	0.0019	0.0052	0.181	0.016	0.029	-0.27836	0.41024	615	11	30	1229	66	95	2500	300	2500	300	862	540	586000	565	20.7	1.07	83	17.1	6.34	299	117.7	13530	NA	212.1	43.7	56.7	n
759	s171006_244	Mcdills25	1.878	0.079	0.19	0.1705	0.0032	0.0088	0.0804	0.0036	0.011	0.15136	0.31027	1015	18	48	1066	28	68	1158	290	1015	48	290	406	539000	278	5.2	-0.000451	15.19	3.11	1.43	188.5	147.5	9480	NA	274	23.6	24.4	n
760	s171006_245	Mcdills25	3.76	0.16	0.38	0.139	0.01	0.012	0.212	0.013	0.031	0.51385	0.84858	833	58	69	1576	34	82	2860	230	2860	230	1550	1525	541000	1230	34.1	0.99	244	33.9	27.6	472	230	16600	NA	815	178.4	142	n
761	s171006_246	Mcdills25	4.44	0.14	0.43	0.1706	0.003	0.0087	0.1886	0.006	0.025	0.23413	0.21352	1015	16	48	1713	27	82	2711	230	2711	230	472	583	586000	794	23.8	0.105	28.7	3.52	2.63	241.8	156.2	14810	NA	393	80.5	72.1	n
762	s171006_247	Mcdills25	1.559	0.09	0.17	0.0955	0.0019	0.005	0.1189	0.0067	0.017	0.36634	-0.083022	588	11	29	943	35	67	1870	270	1870	270	572	713	587000	357	11	0.119	59.9	3.94	4.93	129.9	71.3	14940	NA	267.1	33.6	24.5	n
763	s171006_249	Mcdills25	1.71	0.11	0.19	0.1551	0.0047	0.0088	0.0804	0.0051	0.012	0.20355	0.24089	929	26	49	996	40	71	1110	300	929	49	331	258	542000	739	17.4	0.153	12.7	11.4	3.2	331	125	11050	NA	156.3	13.5	18.8	y
764	s171006_25	Mcdills25	4.4	0.18	0.44	0.2883	0.0069	0.015	0.1039	0.0044	0.014	0.28349	0.36296	1631	34	77	1703	33	83	1670	270	1670	270	103.5	425	447000	205	5.2	0.16	8.33	0.88	0.28	55.7	36	11030	NA	458	54.9	21.1	y
765	s171006_250	Mcdills25	1.424	0.07	0.15	0.094	0.002	0.0049	0.1106	0.0055	0.016	0.26622	0.14228	579	12	29	891	29	63	1754	270	1754	270	425	671	579000	507	5.4	0.041	56.9	1.05	1.1	134.1	161	15780	NA	247.3	29.8	30.5	n
766	s171006_251	Mcdills25	2.166	0.085	0.22	0.1795	0.0039	0.0095	0.0889	0.0038	0.012	0.14255	0.22501	1063	21	52	1168	29	74	1373	260	1063	52	193.6	422	554000	434	15.4	0.101	12.2	1.48	1.19	115.6	71.4	15280	NA	295	28	9.42	n
767	s171006_252	Mcdills25	12.9	0.29	1.2	0.4593	0.0071	0.023	0.2047	0.0032	0.027	0.62682	0.32564	2435	32	100	2668	21	91	2859	220	2859	220	268.4	904	527000	227	9	-0.000475	18.27	0.85	1.06	61	38.7	12920	NA	1645	366	34.5	n
768	s171006_253	Mcdills25	13.99	0.36	1.3	0.4926	0.0087	0.025	0.2075	0.0044	0.028	0.552	0.30382	2580	38	110	2748	25	95	2878	220	2878	220	195.4	468	522000	186	8.6	0.024	15.2	1.05	1.31	48	29.7	12910	NA	894	202.4	21.4	n
769	s171006_254	Mcdills25	0.82	0.1	0.13	0.0926	0.003	0.0053	0.0634	0.0078	0.011	0.079754	0.27743	570	18	32	577	56	70	510	370	570	32	194.9	117.8	553000	145	8.4	0.052	37.5	8.3	4.86	93.7	36.9	11200	NA	42.5	2.99	8.71	y
770	s171006_256	Mcdills25	3.61	0.19	0.39	0.1542	0.0032	0.0081	0.1704	0.009	0.024	0.31172	-0.033189	924	18	45	1535	44	88	2524	240	2524	240	688	444	550000	574	15.3	0.091	54	6.8	5.22	234	93.1	11900	NA	266.7	50	47.8	n
771	s171006_258	Mcdills25	1.39	0.1	0.17	0.1371	0.0048	0.0081	0.0742	0.0061	0.011	-0.045048	0.52245	827	27	46	869	44	70	920	320	827	46	65	211	545000	188	2.5	0.023	6.9	1.64	0.85	88	53.6	15760	NA	111.2	9.34	4.65	y
772	s171006_259	Mcdills25	1.55	0.15	0.21	0.1567	0.0058	0.0095	0.0717	0.0073	0.012	-0.047439	0.48211	937	32	53	928	59	81	800	360	937	53	57	93.2	525000	275	2.15	0.028	9.62	1.5	1.28	118.7	69.1	11560	NA	56.2	4.5	4.32	y
773	s171006_26	Mcdills25	3.7	0.12	0.36	0.2635	0.0039	0.013	0.0956	0.0028	0.013	0.13971	0.27849	1507	20	67	1567	25	77	1521	250	1521	250	74	1012	499000	800	5.9	-0.000581	5.97	0.44	0.35	146.1	173.1	13190	NA	994	109.3	13.3	y
774	s171006_260	Mcdills25	3.79	0.13	0.38	0.2771	0.0049	0.014	0.1002	0.0037	0.014	0.19365	0.30444	1576	25	72	1589	30	83	1597	260	1597	260	175.9	352	535000	281	15	0.44	8.46	2.13	0.54	111.1	68.6	11560	NA	381	42.1	24.32	y
775	s171006_261	Mcdills25	2.53	0.12	0.26	0.1618	0.0034	0.0085	0.1143	0.0058	0.016	-0.066183	0.48057	966	19	47	1271	34	75	1819	250	1819	250	459	411.1	587000	542	11.5	0.45	45.5	8.4	2.89	332	164.9	11760	NA	258.1	32.7	34.8	n
776	s171006_262	Mcdills25	4.73	0.26	0.51	0.3126	0.0092	0.018	0.1099	0.0054	0.015	0.49314	0.2584	1751	45	86	1753	46	91	1746	260	1746	260	117	162.7	526000	139	5.6	0.028	14.14	2.53	1.03	113.1	62.4	11220	NA	198.4	24.1	18.36	y
777	s171006_263	Mcdills25	2.26	0.15	0.26	0.2025	0.0054	0.011	0.0807	0.0051	0.012	0.091604	0.3689	1187	29	60	1181	48	82	1130	340	1187	60	82.5	126.7	538000	287	6.2	0.066	9.44	1.46	0.58	88.2	57.8	10950	NA	99.1	8.98	8.53	y
778	s171006_264	Mcdills25	2.216	0.096	0.23	0.1911	0.0033	0.0097	0.0837	0.0034	0.011	0.15008	0.16934	1127	18	53	1179	29	69	1275	290	1127	53	686	465	575000	410	8.8	5.6	48.9	11.8	1.14	153.2	92.2	14870	NA	344	32.1	44.1	n
779	s171006_265	Mcdills25	3.66	0.13	0.36	0.2669	0.0047	0.014	0.0992	0.0029	0.013	0.49099	0.06475	1524	24	70	1556	28	78	1591	250	1591	250	280.4	462	530000	728	7.5	0.004	14.8	1.63	0.88	171	119.3	13770	NA	477	52.8	18.98	y
780	s171006_266	Mcdills25	4.86	0.18	0.48	0.2786	0.005	0.014	0.1267	0.005	0.017	-0.11108	0.52026	1583	25	72	1786	32	84	2023	240	2023	240	84.8	462	548000	353	2.58	-0.000479	9.6	0.63	0.28	39.9	64.9	14350	NA	498	70	29.2	n
781	s171006_267	Mcdills25	16.11	0.27	1.5	0.5231	0.0074	0.026	0.2219	0.0041	0.029	0.22963	0.3927	2711	31	110	2881	16	91	2988	220	2988	220	46.6	849	542000	1500	3.5	1.86	9.1	4.8	0.288	29.2	103.2	13210	NA	1710	424.5	11.4	y
782	s171006_268	Mcdills25	4.22	0.18	0.43	0.1233	0.002	0.0063	0.2469	0.0094	0.034	0.51692	-0.19847	750	12	36	1666	37	86	3139	230	3139	230	208.3	756	593000	584	5.1	-0.000564	18.9	2.2	1.42	150.3	136.3	15030	NA	360.2	98.9	87.5	n
783	s171006_269	Mcdills25	1.284	0.072	0.14	0.1309	0.0058	0.0086	0.072	0.0034	0.01	0.57729	-0.030388	791	34	49	835	34	65	930	300	791	49	275	573	575000	821	8.9	2.04	18.2	4.48	0.91	214	134	14000	NA	283	22.8	11.6	y
784	s171006_27	Mcdills25	2.16	0.13	0.24	0.1922	0.0049	0.01	0.0768	0.0044	0.011	0.34243	0.089204	1137	28	60	1154	41	75	1040	290	1137	60	131	231	461000	552	2.97	-0.000524	9.88	1.24	0.34	139	89.5	9650	NA	167	14.7	13.5	y
785	s171006_270	Mcdills25	13.4	0.21	1.3	0.4961	0.0065	0.025	0.196	0.0029	0.026	0.45035	0.23428	2600	28	110	2710	15	89	2790	220	2790	220	246	1161	576000	302	7.5	0.047	23	2.59	1.21	168	167.2	15580	NA	2210	486	38.4	y
786	s171006_271	Mcdills25	1.651	0.099	0.18	0.1577	0.0033	0.0083	0.0758	0.0044	0.011	0.071919	0.2042	944	19	46	977	37	69	1030	310	944	46	250	291.3	579000	352	4	0.029	11.9	4.58	1.07	190.3	89.4	12900	NA	177.2	14.78	12.51	y
787	s171006_272	Mcdills25	18.94	0.47	1.8	0.546	0.011	0.028	0.2513	0.0074	0.034	0.07327	0.5112	2813	48	120	3034	25	95	3178	210	3178	210	107	170.2	589000	120	3.6	-0.000573	15.5	1.39	1.59	53.9	58.8	11940	NA	360	100.6	10.1	n
788	s171006_273	Mcdills25	2.35	0.15	0.26	0.1997	0.0043	0.011	0.0854	0.0055	0.012	0.11664	0.2352	1173	23	57	1218	43	78	1260	290	1173	57	201.9	189.7	580000	285	8.6	0.038	21.6	1.1	0.98	106.6	69.1	13220	NA	144.8	13.79	13.42	y
789	s171006_275	Mcdills25	17.49	0.5	1.7	0.465	0.011	0.025	0.2705	0.0057	0.036	0.56771	0.2492	2458	47	110	2961	27	91	3309	190	3309	190	353	312	590000	195	11.7	0.052	37.8	3.07	2.38	162.3	94.5	13660	NA	557	168.9	34.4	n
790	s171006_276	Mcdills25	17.65	0.48	1.7	0.514	0.01	0.027	0.2478	0.0051	0.033	0.69417	-0.24016	2669	45	110	2965	27	98	3163	210	3163	210	278	479	572000	421	11.3	0.01	29.9	1.97	1.04	115.2	86.4	14430	NA	950	266	38.9	n
791	s171006_277	Mcdills25	2.05	0.1	0.21	0.0922	0.0017	0.0048	0.1601	0.0081	0.022	0.3765	-0.0089798	569	10	28	1121	35	74	2405	260	2405	260	600	721	530000	279	4.9	4.1	41.2	5.1	1.8	61.4	43.1	11830	NA	256.2	46.2	56.9	n
792	s171006_278	Mcdills25	1.042	0.059	0.11	0.1099	0.0026	0.0059	0.0687	0.004	0.0099	0.1377	0.15432	672	15	34	722	32	61	820	340	672	34	106.8	370.6	544000	280	4.4	-0.000477	14.43	0.87	0.46	73.2	47.4	13250	NA	155.8	12.08	6.71	y
793	s171006_279	Mcdills25	0.77	0.11	0.13	0.0932	0.0032	0.0055	0.0608	0.0087	0.012	-0.081162	0.23096	574	19	32	554	65	78	370	390	574	32	146.3	109.4	551000	117	6	0.036	35.8	2.25	1.1	29.5	17.51	9780	NA	39	2.59	7.1	y
794	s171006_28	Mcdills25	14.58	0.46	1.4	0.49	0.011	0.026	0.205	0.0066	0.028	0.214	0.45547	2566	48	110	2781	29	90	2848	220	2848	220	211.2	152.1	466000	196	217	0.085	37.7	3.98	3.23	67.6	48.2	10100	NA	277.6	65	37.5	y
795	s171006_280	Mcdills25	3.11	0.15	0.32	0.2267	0.0074	0.013	0.0995	0.0047	0.014	0.27257	0.34378	1315	39	69	1422	37	79	1563	270	1563	270	88.3	203	551000	720	11.9	15	43	25.2	0.92	120.8	71.7	11760	NA	173.2	19.4	12.39	n
796	s171006_281	Mcdills25	1.077	0.07	0.12	0.0872	0.0016	0.0045	0.0885	0.0058	0.013	0.1836	0.045128	539	9.7	27	732	32	56	1330	280	539	27	467	448.7	601000	259	5.9	0.34	33.7	2.06	1.75	88.3	49.3	14180	NA	149.5	14.82	11.9	n
797	s171006_282	Mcdills25	0.978	0.084	0.12	0.0908	0.0019	0.0048	0.0773	0.0068	0.012	0.0078458	0.2473	560	11	28	684	46	67	980	350	560	28	178.1	232.3	572000	243	7.3	0.014	12.05	1.11	1.09	66.8	45.8	14630	NA	81.2	7.09	6.38	n
798	s171006_283	Mcdills25	3.33	0.16	0.34	0.2384	0.0051	0.013	0.1007	0.005	0.014	0.036285	0.29706	1377	27	65	1482	38	85	1600	280	1600	280	362	185.9	577000	555	23.2	2.2	61.8	10.9	4.01	263	146.9	12390	NA	170.1	19.15	26.8	n
799	s171006_284	Mcdills25	4.54	0.14	0.44	0.2911	0.0045	0.015	0.1119	0.0033	0.015	0.20894	0.2525	1646	23	73	1733	25	82	1824	230	1824	230	395	569	547000	421	9.2	0.005	47.9	1.35	0.57	120.4	112	15930	NA	637	80.6	50.7	y
800	s171006_285	Mcdills25	2.159	0.093	0.22	0.1944	0.0031	0.0098	0.0792	0.0034	0.011	0.11459	0.26034	1145	17	53	1160	30	72	1145	290	1145	53	97.3	419.6	573000	379	3.9	0.01	3.91	0.57	0.39	102.5	22.7	14840	NA	313.4	28	5.06	y
801	s171006_286	Mcdills27	1.211	0.062	0.13	0.1282	0.0042	0.0074	0.0676	0.0033	0.0095	0.42401	0.10829	777	24	43	798	29	59	810	310	777	43	288	365	526000	175	7	-0.000431	11.07	0.82	1.16	41.3	41	11840	NA	176.1	13.27	10.71	y
802	s171006_287	Mcdills27	0.918	0.041	0.094	0.0774	0.0019	0.0042	0.0855	0.0042	0.012	0.1049	0.42147	480	11	25	657	22	50	1286	280	480	25	766	734	535000	466	16.2	0.068	35.3	11.4	12.3	272	99.6	13440	NA	220.1	21	21.06	n
803	s171006_288	Mcdills27	1.79	0.1	0.19	0.1776	0.0031	0.0091	0.0721	0.0043	0.01	0.023803	0.26994	1054	17	50	1035	37	69	930	300	1054	50	79.5	312	548000	838	11	0.012	1.6	2.34	0.261	231.4	103.6	13200	NA	212.7	17.1	7.18	n
804	s171006_289	Mcdills27	2.03	0.076	0.2	0.1839	0.0031	0.0093	0.0789	0.0031	0.011	0.24614	0.25744	1088	17	51	1124	27	72	1147	270	1088	51	38.4	541	546000	182	2.41	-0.000436	4.16	-0.0001118	0.219	28.7	39.3	14470	NA	386	34.3	3.57	y
805	s171006_29	Mcdills25	1.81	0.16	0.23	0.1553	0.0043	0.0086	0.081	0.0072	0.013	0.00012262	0.32411	930	24	48	1029	56	82	1070	330	930	48	90	141.8	491000	211	5.6	0.04	6.49	2.59	1.58	124.4	56.4	10340	NA	82	7.57	5.3	y
806	s171006_291	Mcdills27	1.946	0.099	0.21	0.1739	0.0034	0.009	0.0801	0.0046	0.011	-0.087475	0.5012	1033	19	50	1087	34	70	1140	300	1033	50	193	463	550000	1313	46	0.3	3.51	4.9	0.84	343	199.9	13750	NA	312	27.7	10.06	y
807	s171006_293	Mcdills27	1.741	0.083	0.18	0.1562	0.0034	0.0083	0.0798	0.0039	0.011	0.18871	0.23629	935	19	46	1016	31	67	1136	280	935	46	277.5	297.8	584000	318	8.5	0.006	13.36	3	2.17	168.6	80.2	12810	NA	179.9	15.77	13.95	y
808	s171006_294	Mcdills27	1.695	0.069	0.17	0.168	0.0032	0.0087	0.0718	0.0031	0.0099	0.058275	0.31394	1001	18	48	1000	26	65	932	300	1001	48	270.7	437.9	543000	385	6.7	2.45	27	7	0.42	143.7	101.1	13500	NA	285.1	22.51	22.31	y
809	s171006_295	Mcdills27	2.678	0.087	0.26	0.17	0.0031	0.0087	0.112	0.0032	0.015	0.45548	0.23004	1012	17	48	1317	24	72	1815	240	1815	240	470	621	541000	700	15.2	0.62	18.7	15.7	2.96	337	139.8	12650	NA	407.5	50.6	45.2	n
810	s171006_298	Mcdills27	2.7	0.23	0.34	0.1012	0.0019	0.0052	0.186	0.014	0.028	0.48143	-0.28678	621	11	31	1292	66	98	2600	280	2600	280	1410	713	524000	314	12.4	0.146	54.8	10.9	8.9	267	90.6	10690	NA	280.1	58.4	71.8	n
811	s171006_3	Mcdills25	6.55	0.41	0.73	0.2999	0.0055	0.015	0.1407	0.0076	0.02	0.28049	-0.013577	1690	27	77	2028	51	91	2185	240	2185	240	353	1190	527000	763	12.2	0.053	20.9	3.9	1.89	213	149.8	13970	NA	1220	212	125	n
812	s171006_300	Mcdills27	1.871	0.07	0.19	0.173	0.0039	0.0092	0.0773	0.0026	0.01	0.42685	0.24996	1028	22	51	1070	23	62	1101	270	1028	51	449	596	563000	342	22.4	0.238	18.9	5.9	3	150	61.8	12000	NA	402	34	35.7	y
813	s171006_301	Mcdills27	10.53	0.35	1	0.4049	0.006	0.02	0.1856	0.0064	0.025	0.14713	0.32505	2190	27	93	2479	33	97	2681	230	2681	230	147.4	215	554000	312	3.6	0.014	42.8	2.35	1.31	106.6	76.7	11940	NA	337.6	68.6	27.4	n
814	s171006_302	Mcdills27	4.13	0.15	0.41	0.2836	0.0071	0.015	0.1048	0.0036	0.014	0.57859	0.36153	1608	36	77	1657	32	86	1698	230	1698	230	318	333	532000	323	19.1	0.013	29.6	2.93	1.5	159.4	100	11720	NA	356	41.1	27.6	y
815	s171006_303	Mcdills27	1.543	0.065	0.16	0.1662	0.0051	0.0095	0.0676	0.0033	0.0095	0.19276	0.45969	990	28	52	952	29	69	820	290	990	52	125.1	487	549000	191	6.5	-0.000472	11.7	0.53	0.185	51.7	51.9	12630	NA	301	22.6	9.68	y
816	s171006_305	Mcdills27	3.789	0.085	0.36	0.2554	0.0039	0.013	0.105	0.0024	0.014	0.34797	0.37206	1466	20	66	1587	18	77	1702	240	1702	240	102	1154	547000	201	14.7	0.35	6.6	1.71	1.85	44.4	10.7	14800	NA	1149	132.7	7.7	n
817	s171006_306	Mcdills27	4.48	0.13	0.43	0.3063	0.005	0.016	0.1043	0.0034	0.014	0.16002	0.41209	1721	25	77	1727	25	86	1680	240	1680	240	82.2	362.6	556000	1008	91	-0.000475	2.74	1.05	0.235	215.1	167.2	13630	NA	434.4	49.7	11.79	y
818	s171006_308	Mcdills27	2.12	0.12	0.23	0.185	0.0037	0.0096	0.0804	0.0043	0.011	0.27777	0.098593	1094	20	52	1149	38	71	1150	300	1094	52	231	290.3	552000	367	9.1	0.076	15.25	1.61	0.86	111.2	69.3	12570	NA	210.9	18.7	16.51	y
819	s171006_309	Mcdills27	1.028	0.062	0.11	0.1065	0.0026	0.0057	0.0695	0.0048	0.01	-0.026563	0.42086	652	15	33	714	33	60	800	310	652	33	167.2	365.5	548000	905	10.4	0.33	27.2	6.54	0.34	264	113.6	8280	NA	153	11.52	10.14	y
820	s171006_31	Mcdills25	4.13	0.15	0.41	0.2916	0.0061	0.015	0.0977	0.0028	0.013	0.55252	0.039036	1654	32	80	1652	30	82	1563	250	1563	250	282.9	623	453000	229	5	0.0026	24.8	0.7	0.149	73.3	65.8	11010	NA	693	77	44.6	y
821	s171006_310	Mcdills27	0.862	0.093	0.12	0.1001	0.0026	0.0055	0.0628	0.0071	0.011	0.041215	0.22954	615	15	32	617	51	67	480	340	615	32	190.5	188.4	554000	355	16.8	2.09	24.8	20.9	11.1	178	28.8	8000	NA	74.2	5.02	9.03	y
822	s171006_311	Mcdills27	0.981	0.071	0.11	0.1002	0.0027	0.0055	0.0679	0.0043	0.0099	0.29239	0.21664	615	16	32	689	37	60	810	320	615	32	28.6	405	553000	73	3.2	0.012	1.33	0.2	0.35	15.8	4.91	14310	NA	157.7	12.06	1.18	n
823	s171006_312	Mcdills27	0.999	0.037	0.099	0.105	0.0016	0.0053	0.0671	0.0026	0.0092	0.18401	0.30336	643.6	9.1	31	704	20	53	831	280	643.6	31	363	1803	534000	675	7.1	0.016	8.88	1.65	0.63	163.8	107	14250	NA	743	54.8	24.7	y
824	s171006_313	Mcdills27	1.598	0.078	0.17	0.1531	0.0033	0.008	0.0719	0.0031	0.0099	0.28121	0.19295	918	18	45	961	31	65	963	320	918	45	532	507	544000	549	10.5	0.03	5.8	5.8	1.23	256	100.3	12250	NA	309	24.9	26.4	y
825	s171006_317	Mcdills27	2.826	0.085	0.27	0.1961	0.0031	0.0099	0.101	0.0025	0.013	0.46187	0.14921	1154	17	53	1358	22	72	1629	240	1629	240	246.2	724	530000	585	166	0.036	7.34	1.72	0.9	146.3	94.3	11610	NA	559	62	29	n
826	s171006_318	Mcdills27	1.3	0.11	0.16	0.1027	0.0031	0.0058	0.09	0.0081	0.014	0.16123	0.25969	633	19	36	826	49	74	1240	340	633	36	416	242	556000	95	6	0.038	56.1	6.2	2.5	63.3	24	11250	NA	97.7	9.25	23.2	n
827	s171006_319	Mcdills27	5.99	0.19	0.58	0.2364	0.0047	0.012	0.1769	0.0037	0.023	0.6688	0.11794	1367	25	64	1967	28	86	2616	220	2616	220	647	670	532000	247	18.8	0.145	86.8	6	3.7	107.2	58	10530	NA	619	120.3	89.3	n
828	s171006_32	Mcdills25	8.79	0.18	0.83	0.1599	0.0027	0.0081	0.3843	0.0086	0.051	0.47426	0.33502	956	15	45	2313	18	86	3841	200	3841	200	671	1180	444000	373	12.5	0.174	101.9	10.5	5.85	143.2	88.9	14680	NA	702	312	301	n
829	s171006_320	Mcdills27	2.69	0.091	0.26	0.2054	0.0033	0.01	0.092	0.0031	0.012	0.2943	0.21169	1204	18	56	1320	25	72	1441	270	1204	56	528	707	554000	500	9.6	1.05	18.8	11.1	10.5	258	82.1	12990	NA	567	57.6	34.8	n
830	s171006_321	Mcdills27	1.399	0.047	0.14	0.1432	0.0022	0.0072	0.0691	0.0023	0.0093	0.10882	0.43023	862	13	41	885	20	59	872	290	862	41	185.6	850	550000	800	4.3	2.35	19.9	5.2	0.81	57	65.1	14250	NA	476	36.2	11.65	y
831	s171006_322	Mcdills27	25.71	0.63	2.5	0.627	0.01	0.032	0.286	0.0054	0.038	0.48292	0.33591	3136	40	130	3330	24	95	3394	210	3394	210	147	321	547000	138	4.4	0.016	10.71	0.59	0.74	52.4	44.6	13200	NA	782	247.4	40.2	y
832	s171006_323	Mcdills27	0.845	0.081	0.11	0.0964	0.0025	0.0053	0.0625	0.0064	0.01	-0.13107	0.37227	593	15	31	604	45	63	500	340	593	31	253.4	263.3	542000	80	4.9	0.0039	37.9	2.74	1.75	35.7	25	10070	NA	99.6	6.73	11.77	y
833	s171006_324	Mcdills27	3.67	0.29	0.45	0.2489	0.0097	0.015	0.1013	0.0054	0.014	0.92679	-0.80256	1429	50	79	1528	64	98	1590	270	1590	270	47.2	1042	544000	213	7	0.005	1.73	0.21	0.43	40.5	44.2	14700	NA	1010	115	6.65	n
834	s171006_325	Mcdills27	0.837	0.093	0.12	0.0888	0.0025	0.0049	0.0657	0.0072	0.011	0.27833	0.0077319	548	15	29	593	53	69	580	360	548	29	475	148.7	514000	164	17.8	0.47	68.4	10.9	3.24	61.1	19.7	10630	NA	51.4	3.66	18.2	y
835	s171006_326	Mcdills27	2.39	0.15	0.27	0.0931	0.0023	0.005	0.18	0.0098	0.026	0.62339	-0.37179	573	13	30	1223	45	82	2631	230	2631	230	666	865	523000	263	7.6	0.44	39.5	3.94	4.36	139.6	70.4	12060	NA	316	65.2	66.3	n
836	s171006_327	Mcdills27	4.01	0.14	0.39	0.2591	0.0045	0.013	0.1084	0.0034	0.015	0.41004	0.24824	1484	23	68	1629	28	81	1752	250	1752	250	604	539	538000	265	10.6	-0.000501	28.3	2.7	4.38	153.2	95.6	11030	NA	549	65.6	51.1	n
837	s171006_329	Mcdills27	0.774	0.094	0.12	0.1013	0.0032	0.0058	0.0549	0.0073	0.01	-0.10922	0.36099	622	19	34	556	55	69	190	350	622	34	242.6	146.6	541000	264	6.9	-0.000496	33.4	1.12	0.32	64.4	38.6	12360	NA	58.1	3.43	11.99	n
838	s171006_33	Mcdills25	2.042	0.077	0.2	0.1837	0.0033	0.0094	0.0774	0.0028	0.011	0.26224	0.21003	1087	18	51	1124	26	69	1099	280	1087	51	563	672	480000	560	4.5	4.6	49.5	14.4	1.37	218	123.3	10710	NA	471	41.4	39.3	y
839	s171006_330	Mcdills27	3.93	0.29	0.46	0.288	0.0076	0.016	0.0955	0.0065	0.014	0.27471	0.11405	1629	38	79	1598	61	98	1480	290	1629	79	70.5	77.9	542000	325	13.6	0.52	24.7	3.9	0.91	85.6	65.5	10570	NA	87.1	9.29	10.46	n
840	s171006_331	Mcdills27	0.694	0.074	0.098	0.0897	0.0032	0.0054	0.055	0.0058	0.0093	0.084137	0.17527	553	19	32	518	44	58	260	340	553	32	68.9	191.7	551000	222	4.7	-0.000489	2.38	0.87	0.72	51.5	70.2	9090	NA	67.1	3.95	3.1	y
841	s171006_332	Mcdills27	1.9	0.11	0.21	0.1722	0.0034	0.0089	0.0774	0.0043	0.011	0.16378	0.18667	1024	19	49	1075	39	74	1100	270	1024	49	189.8	259	542000	197	5.5	-0.000479	3.98	2.82	0.91	125.3	56.4	12020	NA	172.7	14.88	10.66	y
842	s171006_333	Mcdills27	1.064	0.07	0.12	0.1088	0.0023	0.0057	0.0679	0.0039	0.0097	0.4055	-0.052594	666	14	33	725	34	59	790	300	666	33	175	543	537000	353	1.09	0.005	6.81	0.26	0.94	98.3	115.2	13100	NA	231	17.31	6.08	y
843	s171006_334	Mcdills27	1.62	0.11	0.19	0.1607	0.0039	0.0086	0.0712	0.0054	0.011	-0.021547	0.32761	960	22	48	958	46	76	830	330	960	48	86.6	192.8	545000	208	4.6	0.028	12.38	2.47	1.22	90.3	59.1	10380	NA	121.4	9.44	6.63	y
844	s171006_335	Mcdills27	2.22	0.13	0.24	0.1974	0.0066	0.012	0.0786	0.0037	0.011	0.60281	0.0020196	1159	36	63	1172	43	80	1110	270	1159	63	325	304	544000	620	6.8	0.036	38.6	8.3	7.4	263	103.2	10660	NA	240.5	20.9	30	y
845	s171006_337	Mcdills27	1.408	0.069	0.15	0.1353	0.0038	0.0075	0.0733	0.0033	0.01	0.38591	0.27254	817	22	43	885	29	62	985	300	817	43	132.9	412	526000	392	8.6	1	32	6.1	3.42	230	97.7	12690	NA	215.4	17.67	9.08	y
846	s171006_338	Mcdills27	1.84	0.12	0.21	0.1744	0.0063	0.01	0.0738	0.004	0.01	0.5707	0.038415	1035	35	58	1043	45	78	960	310	1035	58	64.9	234.9	546000	342	6.1	-0.000484	6.24	0.53	0.24	60.2	65.4	14160	NA	159.2	13.01	6.2	y
847	s171006_34	Mcdills25	3.81	0.37	0.51	0.2718	0.009	0.016	0.0958	0.0093	0.016	0.11737	0.31814	1547	45	80	1538	81	110	1350	360	1547	80	30.2	52.5	456000	206	7.3	-0.00052	9.02	1.07	0.62	78.1	63.8	9080	NA	53.9	5.88	4.31	n
848	s171006_340	Mcdills27	5.02	0.21	0.51	0.3072	0.0053	0.016	0.1152	0.0049	0.016	0.10702	0.26684	1726	26	77	1818	34	85	1858	250	1858	250	500	252	578000	358	10.2	0.026	26.7	1.96	2.63	138.5	88.3	13960	NA	300.7	38.4	28.87	y
849	s171006_341	Mcdills27	1.507	0.051	0.15	0.1315	0.003	0.007	0.0804	0.002	0.011	0.6858	0.2529	796	17	40	929	21	61	1191	260	796	40	649	2070	510000	1483	40.1	0.23	134.1	22.1	30.6	674	254.7	19460	NA	1056	94.7	60.6	n
850	s171006_342	Mcdills27	0.992	0.073	0.12	0.0841	0.0012	0.0042	0.0822	0.0056	0.012	0.2026	-0.013655	520.7	7	25	687	37	59	1140	300	520.7	25	463.8	1032	523000	210	3.3	0.012	28.9	1.57	2.35	140	82.1	12940	NA	335.7	30.6	29.5	n
851	s171006_344	Mcdills27	0.729	0.061	0.091	0.0875	0.0023	0.0048	0.059	0.0047	0.009	0.064708	0.24075	540	14	28	545	35	52	450	330	540	28	248.2	416	530000	220	6.7	0.0041	17.3	1.35	0.62	89.7	67.6	11040	NA	137.8	8.9	10.93	y
852	s171006_345	Mcdills27	1.804	0.081	0.19	0.1765	0.0032	0.0091	0.0719	0.003	0.0099	0.19211	0.13092	1047	17	50	1040	29	67	955	270	1047	50	102.1	416.3	523000	979	10	-0.000479	1.93	2.24	0.142	254.2	132	12980	NA	283.9	22.8	9.19	y
853	s171006_346	Mcdills27	1.836	0.091	0.19	0.1812	0.0037	0.0094	0.0713	0.0034	0.0099	0.28088	0.14087	1073	20	52	1054	34	71	930	310	1073	52	155	455	537000	183	3.4	-0.000499	15.88	1	0.62	133.9	98.6	10560	NA	317.7	25.6	13.88	n
854	s171006_347	Mcdills27	0.802	0.095	0.12	0.095	0.0028	0.0054	0.0619	0.0081	0.011	-0.027757	0.20927	585	17	32	580	56	71	400	360	585	32	156.2	140.2	513000	214	15.6	2.49	49	4.85	0.88	45.3	21.31	10940	NA	51.2	3.42	7.69	y
855	s171006_348	Mcdills27	5.07	0.21	0.51	0.3298	0.0071	0.017	0.1091	0.0049	0.015	0.06518	0.40811	1836	34	84	1821	35	88	1740	260	1740	260	110.6	182.9	512000	142	43.9	0.041	9.28	2.85	1.15	73.9	42.8	9570	NA	230.1	28.3	17.7	y
856	s171006_349	Mcdills27	3.62	0.14	0.36	0.2493	0.009	0.015	0.1026	0.0024	0.014	0.83269	0.37408	1432	46	77	1545	31	80	1659	250	1659	250	657	1405	507000	1175	18.8	0.062	37.1	13.7	14.2	377	155	14560	NA	1323	152.5	31.1	n
857	s171006_35	Mcdills25	4.23	0.23	0.45	0.116	0.0021	0.0059	0.254	0.012	0.036	0.31088	-0.027623	707	12	34	1661	47	94	3163	240	3163	240	349	883	474000	359	4.1	0.063	13.04	5.09	1.75	176.9	77.2	10800	NA	393	117	117	n
858	s171006_350	Mcdills27	3.89	0.13	0.38	0.288	0.0047	0.015	0.0953	0.0026	0.013	0.46916	0.10529	1631	23	73	1606	26	78	1516	260	1516	260	78.7	454	515000	1005	9.6	-0.000464	2.12	1.74	0.153	205.1	125.7	12960	NA	503	53.9	11.36	y
859	s171006_351	Mcdills27	4.61	0.15	0.45	0.3098	0.0047	0.016	0.1057	0.0035	0.014	0.32691	0.17894	1739	23	77	1749	28	86	1702	250	1702	250	427	329	513000	308	13.3	0.02	55.1	1.78	1.88	116	83.8	12270	NA	385	46.3	53.4	y
860	s171006_352	Mcdills27	24.35	0.49	2.3	0.594	0.0098	0.03	0.2884	0.0042	0.038	0.66569	0.40494	3004	39	120	3279	20	93	3409	210	3409	210	362	502	525000	463	8.7	0.229	15.7	1.76	1.96	122.9	97.3	12730	NA	1139	371	33.8	n
861	s171006_353	Mcdills27	1.843	0.056	0.18	0.1752	0.0023	0.0087	0.0752	0.0025	0.01	0.22522	0.16085	1040	13	48	1062	21	67	1048	270	1040	48	345.7	870	520000	377	5.7	0.023	16.1	1.45	0.234	140.7	90.8	13150	NA	584	49.5	29.8	y
862	s171006_355	Mcdills27	2.239	0.063	0.22	0.1745	0.002	0.0086	0.0903	0.0025	0.012	0.16395	0.2069	1037	11	47	1193	19	65	1415	270	1037	47	1183	954	553000	305	9.5	0.046	49.5	4.6	5.87	175.7	82.4	14700	NA	639	65.1	43.5	n
863	s171006_356	Mcdills27	0.776	0.046	0.085	0.0921	0.0016	0.0047	0.0597	0.0036	0.0086	0.0057413	0.30449	567.9	9.6	28	577	26	48	510	310	567.9	28	173.2	466	524000	139	6.2	-0.0004494	9.7	0.97	1.34	43.4	19.1	14750	NA	164.8	11.07	5.39	y
864	s171006_357	Mcdills27	2.229	0.082	0.22	0.1583	0.003	0.0082	0.1011	0.0052	0.014	-0.31241	0.71192	947	16	46	1184	27	72	1590	270	1590	270	496	1072	5.00E+05	704	17.2	0.029	30.5	6.5	9.8	306	129.6	15080	NA	639	73.8	39.1	n
865	s171006_358	Mcdills27	1.034	0.038	0.1	0.0908	0.0013	0.0045	0.081	0.0034	0.011	-0.091578	0.44956	560.4	7.5	27	718	19	52	1178	290	560.4	27	606	1115	562000	287	9.5	0.28	48.3	3.46	3.61	118	75.2	15070	NA	386.3	35.1	28	n
866	s171006_359	Mcdills27	2.38	0.21	0.31	0.2073	0.0059	0.012	0.0827	0.008	0.013	-0.090466	0.3844	1213	31	62	1209	65	93	1090	330	1213	62	122.4	92.2	514000	327	18.3	0.025	65.8	3.67	2.58	133	72.7	10590	NA	73	6.67	13.4	n
867	s171006_36	Mcdills25	2.39	0.13	0.26	0.2133	0.0047	0.011	0.0785	0.0043	0.011	0.28598	0.10253	1245	25	60	1225	39	77	1090	290	1245	60	70.6	276.6	483000	202	1.55	-0.000532	5.92	0.98	0.38	66.1	34.4	11180	NA	223.5	19.5	8.8	n
868	s171006_360	Mcdills27	1.724	0.076	0.18	0.1694	0.0026	0.0085	0.0723	0.0027	0.0099	0.092009	0.24754	1009	14	47	1016	27	62	971	300	1009	47	162.3	430.7	515000	337	5.8	0.014	3.2	2.49	0.38	167.4	85.4	12050	NA	280	22.7	13.67	y
869	s171006_361	Mcdills27	1.15	0.067	0.13	0.096	0.0024	0.0052	0.085	0.0042	0.012	0.53902	-0.22079	591	14	31	775	32	60	1284	280	591	31	564	1137	547000	253	10.9	0.038	28.1	2.8	5.26	124.4	37.5	15470	NA	411	38.4	17.01	n
870	s171006_362	Mcdills27	4.71	0.12	0.45	0.1924	0.0041	0.01	0.1733	0.0042	0.023	0.51332	0.23535	1133	22	55	1764	22	81	2585	240	2585	240	2028	1295	486000	868	27.5	0.234	101.9	17.6	17.3	355	144.6	16030	NA	955	185.6	181.5	n
871	s171006_363	Mcdills27	3.672	0.092	0.35	0.2697	0.0037	0.013	0.0967	0.0023	0.013	0.2946	0.24272	1539	19	68	1562	20	76	1548	250	1548	250	203.9	856	572000	1118	6.9	-0.000593	13.27	0.65	1.4	141.6	253.8	15880	NA	881	95.2	5.33	y
872	s171006_364	Mcdills27	1.208	0.063	0.13	0.123	0.0022	0.0063	0.0692	0.0031	0.0096	0.40284	-0.069407	748	13	36	802	30	62	870	320	748	36	304	582	539000	147	5.2	-0.000463	16	1.55	1.09	73.1	43.4	15220	NA	275.4	21.4	9.51	y
873	s171006_365	Mcdills27	3.12	0.2	0.35	0.1067	0.0027	0.0058	0.2062	0.0087	0.028	0.82301	-0.55633	653	16	34	1424	51	88	2846	220	2846	220	809	1690	501000	890	29.6	9.8	115	35.1	23.9	394	76	16360	NA	693	163	150	n
874	s171006_366	Mcdills27	4.33	0.14	0.42	0.2797	0.0036	0.014	0.1098	0.0034	0.015	0.20717	0.23049	1589	18	70	1694	26	81	1776	250	1776	250	202.4	483.7	560000	320	5.7	0.108	11.14	0.99	0.88	66.9	60.6	15380	NA	520.5	64	12.31	n
875	s171006_367	Mcdills27	0.826	0.039	0.086	0.0963	0.0016	0.0049	0.0606	0.0027	0.0084	0.13727	0.26976	592.6	9.2	29	607	21	47	590	310	592.6	29	717	1110	527000	273	7	0.015	11.86	2.11	1.56	89.6	58.4	12880	NA	408	27.3	19.88	y
876	s171006_368	Mcdills27	15.35	0.47	1.5	0.5347	0.0098	0.027	0.2046	0.005	0.027	0.49914	0.24698	2759	41	120	2830	29	91	2852	220	2852	220	125.1	260	534000	311	5.6	0.005	15.24	1.48	0.96	110	93.4	10690	NA	536	122.2	31.3	y
877	s171006_369	Mcdills27	1.954	0.089	0.2	0.1836	0.0031	0.0093	0.0761	0.0035	0.011	0.13544	0.24132	1086	17	51	1092	31	70	1044	290	1086	51	313	439	537000	829	12.8	-0.000496	2.59	3.01	0.56	208.4	122.9	11870	NA	310.8	26.4	14.79	y
878	s171006_37	Mcdills25	2.68	0.18	0.31	0.1941	0.0049	0.011	0.0975	0.0067	0.014	-0.065384	0.40363	1142	27	57	1300	52	89	1460	320	1142	57	187	339	461000	304	7.6	0.0036	26	1.6	1.18	86.8	60.5	12680	NA	249	28.4	16.5	n
879	s171006_370	Mcdills27	17.3	0.31	1.6	0.5711	0.007	0.028	0.2161	0.0028	0.028	0.50896	0.34679	2911	29	120	2949	17	91	2948	210	2948	210	77.3	848	519000	156	3.9	-0.000467	4.27	0.54	0.8	44.6	44.8	12930	NA	1855	444	16.6	y
880	s171006_371	Mcdills27	1.08	0.11	0.15	0.1077	0.0038	0.0064	0.0747	0.0085	0.013	0.031019	0.27738	659	22	37	729	57	76	810	350	659	37	537	180.7	565000	311	5.3	0.012	40.5	2.91	2.25	175	86.2	12400	NA	74.2	5.87	14.7	y
881	s171006_372	Mcdills27	3.17	0.21	0.36	0.2521	0.006	0.014	0.0909	0.0063	0.013	0.023784	0.37201	1448	31	70	1436	50	86	1360	300	1448	70	81.4	120.1	536000	573	6.3	0.27	25.1	4.07	2.33	167.1	92.2	10440	NA	115.6	11.58	10	y
882	s171006_373	Mcdills27	3.62	0.14	0.36	0.2468	0.0074	0.014	0.106	0.0047	0.015	0.084866	0.4997	1420	39	73	1544	31	81	1704	250	1704	250	785	358	526000	1020	20.3	0.034	25	3.83	3.18	259.8	129.8	13750	NA	330	39.5	22	n
883	s171006_374	Mcdills27	1.269	0.075	0.14	0.0946	0.0028	0.0053	0.0944	0.0053	0.013	0.21229	0.23203	582	17	31	822	33	61	1480	290	582	31	968	380	519000	1230	17.9	0.161	25.4	17.2	25.9	398	97.1	11280	NA	140	15	29.7	n
884	s171006_376	Mcdills27	18.32	0.59	1.8	0.582	0.0099	0.03	0.2237	0.0044	0.03	0.75419	-0.284	2954	41	120	2997	33	100	3000	220	3000	220	609	554	520000	424	18	0.16	64	5.8	6.44	166	89.7	10540	NA	1256	312.1	120	y
885	s171006_38	Mcdills25	0.837	0.07	0.1	0.1017	0.0026	0.0056	0.0576	0.0047	0.0089	0.21218	0.09246	624	15	32	604	38	57	400	320	624	32	198.3	322.3	471000	240	7.7	-0.000517	18.19	5.14	2.47	126.9	58.9	9340	NA	125.7	8.11	11.48	y
886	s171006_39	Mcdills25	4.63	0.16	0.46	0.1981	0.0043	0.01	0.165	0.0064	0.023	0.13453	0.35973	1164	23	56	1746	29	83	2479	230	2479	230	53.8	333	467000	56	15	0.15	11.2	2.15	0.96	7	14	10130	NA	251.3	46.6	6.23	n
887	s171006_4	Mcdills25	3.92	0.14	0.39	0.2826	0.005	0.014	0.0907	0.0031	0.012	0.53348	0.028226	1609	27	79	1621	32	86	1414	260	1609	79	232	683	490000	775	9.1	0.023	12.55	3.44	0.87	191.4	150.3	11730	NA	662	68.3	34.2	n
888	s171006_40	Mcdills25	2.44	0.13	0.26	0.2193	0.0047	0.012	0.078	0.0045	0.011	-0.019399	0.4325	1283	26	65	1254	39	77	1100	300	1283	65	25.3	177.3	478000	868	6.6	-0.000533	1.77	0.74	0.28	181.6	134.8	11500	NA	149	13.25	2.91	n
889	s171006_41	Mcdills25	2.14	0.11	0.22	0.1746	0.0034	0.009	0.0865	0.0042	0.012	0.082821	0.30041	1037	19	50	1151	33	70	1297	270	1037	50	196	531	479000	950	7.6	6	26.9	11.7	0.97	105.4	73.8	10490	NA	361	35.2	22.9	n
890	s171006_42	Mcdills25	21.29	0.52	2	0.579	0.014	0.031	0.2664	0.0072	0.036	0.41145	0.33938	2942	56	130	3156	27	100	3273	220	3273	220	246	217.9	527000	255	5.4	-0.000727	32.9	2.05	2.17	104.1	84.2	11610	NA	481	142.6	27	n
891	s171006_44	Mcdills25	0.847	0.081	0.11	0.0992	0.0033	0.0058	0.0616	0.006	0.01	0.062526	0.33198	609	19	34	605	45	62	510	350	609	34	221.4	196	489000	202	16.1	0.041	19.6	10.4	1.82	134.8	42.9	9210	NA	74.3	5.07	12.36	y
892	s171006_45	Mcdills25	3.38	0.12	0.33	0.254	0.0052	0.013	0.095	0.0033	0.013	0.35498	0.19298	1463	28	71	1493	27	77	1502	250	1502	250	100.6	639	492000	630	21.8	0.004	5.25	0.8	0.29	112.2	90.6	12850	NA	626	65.7	11.35	y
893	s171006_46	Mcdills25	1.81	0.081	0.19	0.1687	0.0029	0.0086	0.0769	0.0032	0.011	0.33314	0.093325	1004	16	47	1042	29	67	1078	270	1004	47	245.8	466	480000	229	3.8	0.0036	14.62	0.88	0.38	87.7	75.2	11430	NA	301	25.7	24.7	y
894	s171006_47	Mcdills25	2.97	0.49	0.56	0.257	0.012	0.017	0.084	0.014	0.018	0.12469	0.13485	1470	60	87	1260	140	160	780	440	1470	87	48.3	28.7	488000	433	22.9	0.063	37.3	5.1	2.01	140.2	78.4	9500	NA	28	2.5	6.53	n
895	s171006_48	Mcdills25	3.93	0.17	0.4	0.2917	0.0067	0.016	0.097	0.004	0.013	0.30393	0.30774	1649	33	77	1616	33	79	1561	240	1561	240	144	326	490000	604	8.9	-0.000513	4.81	2.14	0.31	129.3	96.2	11540	NA	367	39.4	21	y
896	s171006_49	Mcdills25	5.85	0.16	0.56	0.2431	0.0037	0.012	0.173	0.0043	0.023	0.46003	0.1757	1402	19	63	1948	24	83	2583	210	2583	210	314	1127	528000	603	19.7	0.018	24.5	0.94	2.1	104.9	131.1	14210	NA	1060	203.7	61	n
897	s171006_5	Mcdills25	14.01	0.27	1.3	0.518	0.01	0.027	0.1769	0.0037	0.023	0.26848	0.46931	2688	43	110	2747	19	90	2615	220	2615	220	579	854	492000	860	12.9	1.8	40.9	15.5	8.3	341	148	12110	NA	1502	309	105	y
898	s171006_50	Mcdills25	0.9	0.11	0.14	0.0973	0.0033	0.0057	0.0661	0.0081	0.012	0.10406	0.11926	598	19	33	624	59	74	590	370	598	33	239.8	180.9	548000	180	5.8	0.096	54.7	10.2	7.26	93.4	30.4	10140	NA	67.4	4.89	10.45	y
899	s171006_51	Mcdills25	0.81	0.11	0.13	0.0967	0.0032	0.0056	0.0611	0.0079	0.011	0.099613	0.16834	594	18	33	572	61	74	380	370	594	33	107.2	118.8	483000	270	39.8	0.193	19.6	14.9	3.44	143.5	41.3	8780	NA	43.8	2.96	6.11	y
900	s171006_53	Mcdills25	1.82	0.2	0.26	0.166	0.0064	0.01	0.0816	0.0097	0.014	0.054503	0.31593	988	35	56	1016	73	96	980	360	988	56	33.7	75.3	481000	173	5.8	-0.000511	10.61	0.81	0.34	35.6	27.7	10260	NA	47.9	4.24	3.14	y
901	s171006_54	Mcdills25	2.04	0.14	0.24	0.1485	0.0061	0.0094	0.0997	0.0059	0.014	0.63548	-0.21493	891	34	53	1108	48	80	1550	270	1550	270	105.1	518	489000	152	4.3	-0.000505	19.6	0.71	0.28	35.8	50.9	9540	NA	290.1	32	12.74	n
902	s171006_55	Mcdills25	0.708	0.058	0.087	0.0838	0.0019	0.0044	0.0618	0.0051	0.0096	0.056629	0.17269	519	11	26	533	34	51	530	320	519	26	184.9	325.4	486000	321	15	0.009	3.82	4.91	0.63	183.4	89.1	8830	NA	105.1	7.08	9.24	y
903	s171006_56	Mcdills25	13.17	0.43	1.3	0.5	0.01	0.026	0.192	0.006	0.026	0.34594	0.23924	2613	43	110	2683	32	94	2741	230	2741	230	156.7	234.1	504000	275	9.7	0.008	26.3	3.18	0.29	99.3	53.7	11970	NA	452	95.6	41.8	y
904	s171006_57	Mcdills25	8.41	0.87	1.2	0.321	0.031	0.034	0.1887	0.0082	0.026	0.97165	-0.72223	1770	160	170	2180	140	180	2700	260	2700	260	243	1019	491000	310	7.4	0.11	16.4	1.78	3.34	90	61.3	12790	NA	1200	256	17.5	n
905	s171006_58	Mcdills25	0.713	0.076	0.1	0.0857	0.0027	0.0049	0.0617	0.0069	0.011	0.072898	0.20302	530	16	29	529	45	60	450	340	530	29	129.2	213.2	510000	270	14.5	0.023	3.98	2.5	0.97	116.9	62.6	9910	NA	70.4	4.71	5.74	y
906	s171006_59	Mcdills25	1.199	0.092	0.14	0.1239	0.0067	0.009	0.0711	0.005	0.011	0.4744	0.32332	751	38	51	784	43	67	870	330	751	51	112	421	505000	663	6.9	0.017	7.1	2.22	0.73	206	62.7	12620	NA	196	15.2	5.28	y
907	s171006_6	Mcdills25	1.039	0.067	0.12	0.099	0.0022	0.0053	0.0686	0.0043	0.01	0.23976	0.082228	608	13	31	713	33	58	790	310	608	31	251	627	499000	1323	11.8	0.74	12	9.3	6.2	408	129.5	11220	NA	212.1	16.8	9.21	n
908	s171006_60	Mcdills25	0.92	0.12	0.15	0.0856	0.0033	0.0052	0.08	0.01	0.015	0.073614	0.16418	529	19	31	627	65	80	890	420	529	31	258	129.5	517000	244	7.1	0.215	52	9.2	4.84	87	18.2	10700	NA	42.5	3.64	10.83	n
909	s171006_61	Mcdills25	8.69	0.5	0.94	0.371	0.02	0.026	0.1741	0.0081	0.024	0.62184	0.24125	2024	91	120	2292	50	95	2573	230	2573	230	102.6	101.5	498000	315	5.9	0.095	20.3	5.7	1.77	110.8	51.5	9540	NA	140.2	26.7	14.19	n
910	s171006_62	Mcdills25	0.931	0.051	0.1	0.0976	0.0017	0.005	0.071	0.0038	0.01	0.19101	0.14171	600	10	29	666	28	55	880	300	600	29	215	913	479000	263	5.1	-0.000527	8.2	1.1	0.84	54.3	8.58	14100	NA	345.1	26.8	8.1	y
911	s171006_63	Mcdills25	7.95	0.34	0.81	0.1568	0.0031	0.0082	0.376	0.017	0.052	0.3943	0.09153	939	17	46	2212	40	96	3784	220	3784	220	3140	1802	505000	1037	57.3	2.2	763	92.7	41	688	272.3	12580	NA	1091	449	501	n
912	s171006_64	Mcdills25	0.773	0.073	0.1	0.0907	0.0028	0.0052	0.0639	0.0063	0.01	0.051739	0.31197	559	16	30	566	42	59	550	340	559	30	103.6	227.8	481000	525	6.4	0.81	25.8	1.79	0.71	119.2	81	10580	NA	80.1	5.53	5.16	y
913	s171006_66	Mcdills25	8.53	0.89	1.2	0.199	0.0039	0.01	0.315	0.03	0.051	0.037724	0.11913	1169	21	56	2220	87	120	3420	240	3420	240	914	1107	479000	870	13.2	1.1	92.1	13.1	6.87	266	132.3	13160	NA	852	312	302	n
914	s171006_67	Mcdills25	1.015	0.036	0.1	0.0966	0.0014	0.0048	0.0779	0.0029	0.011	0.19424	0.15947	594.4	8.2	28	708	18	51	1111	270	594.4	28	307	1698	524000	94	5	0.08	19.4	0.72	1.2	37.3	30.4	13990	NA	635	53.9	20.2	n
915	s171006_68	Mcdills25	1.64	0.13	0.2	0.0898	0.0032	0.0054	0.136	0.011	0.021	0.060489	0.34726	554	19	32	963	52	78	2080	290	2080	290	814	318	521000	323	65	0.46	51.5	9.5	6.1	192	46	11800	NA	108.8	15.8	28	n
916	s171006_69	Mcdills25	0.694	0.042	0.076	0.088	0.0015	0.0045	0.0583	0.0033	0.0083	0.27124	0.047895	543.3	8.7	27	530	25	46	500	290	543.3	27	328.5	629	490000	348	7	-0.000521	32	1.32	0.24	115.3	87.4	11700	NA	215.5	13.42	15.64	y
917	s171006_7	Mcdills25	1.94	0.21	0.27	0.1147	0.0034	0.0065	0.111	0.01	0.018	0.49772	-0.075978	700	20	37	1067	67	89	1650	280	1650	280	519	306	470000	204	13.3	0.166	82	17	10.85	155	39.3	9250	NA	122.5	16.4	34.9	n
918	s171006_70	Mcdills25	0.88	0.1	0.13	0.0907	0.0029	0.0052	0.0693	0.0055	0.011	0.45992	-0.18916	560	17	31	636	55	70	910	380	560	31	369	472	473000	165	5.1	0.047	36.5	1.57	1.96	57	40.8	10170	NA	162.6	12.9	17.7	n
919	s171006_71	Mcdills25	6.41	0.21	0.63	0.1426	0.0031	0.0075	0.336	0.012	0.046	-0.0017171	0.53761	859	17	42	2025	30	89	3624	210	3624	210	1112	1913	463000	1024	33.6	0.7	289	36.7	22.8	406	188.7	13910	NA	1050	387	354	n
920	s171006_72	Mcdills25	8.2	1.2	1.4	0.137	0.0068	0.0095	0.411	0.042	0.068	0.92547	-0.81269	826	38	53	2100	130	160	3800	260	3800	260	2490	1600	501000	1430	40.8	1.15	367	54.6	40.5	850	170	12140	NA	910	500	530	n
921	s171006_73	Mcdills25	0.903	0.052	0.098	0.0966	0.0017	0.0049	0.0701	0.0042	0.01	0.014137	0.29614	594.1	9.7	29	646	28	53	840	310	594.1	29	578	576	512000	315	13.8	0.158	16.4	11.9	1.77	230.4	74.1	10480	NA	214.6	16.3	26.43	y
922	s171006_74	Mcdills25	8.29	0.27	0.81	0.1299	0.0025	0.0067	0.478	0.01	0.064	0.81568	-0.40083	787	14	38	2261	30	88	4169	210	4169	210	3000	1909	482000	1037	41.6	3.34	610	81.1	34.5	560	187.7	10290	NA	959	493	560	n
923	s171006_75	Mcdills25	4.69	0.4	0.59	0.277	0.0045	0.014	0.129	0.011	0.02	0.043624	0.13971	1575	23	71	1739	64	94	1970	230	1970	230	496	875	505000	943	13.1	0.052	16.9	2.96	1.36	247.6	138.7	13190	NA	946	141	66	n
924	s171006_76	Mcdills25	17.26	0.76	1.8	0.526	0.018	0.031	0.2447	0.0063	0.033	0.80167	0.090029	2718	77	130	2932	45	100	3140	210	3140	210	214.6	177.9	490000	350	6.8	0.31	26.2	6.6	2.57	155	78.5	9110	NA	357.9	94.5	58.9	n
925	s171006_77	Mcdills25	2.11	0.21	0.28	0.1193	0.0025	0.0063	0.132	0.012	0.021	0.59238	-0.44288	726	14	36	1110	68	93	1940	320	1940	320	200	639	546900	286	6.7	0.013	14.5	0.76	0.95	69.9	57.4	14050	NA	295.2	43.3	30.6	n
926	s171006_78	Mcdills25	2.22	0.14	0.25	0.2128	0.0062	0.012	0.0781	0.005	0.011	-0.01634	0.41069	1242	33	63	1169	44	80	1070	330	1242	63	38.2	174.9	502000	300	5.4	0.5	10.25	1.54	0.25	78.4	73.7	13040	NA	142.5	12.03	4.55	n
927	s171006_8	Mcdills25	13.08	0.62	1.4	0.363	0.015	0.023	0.2366	0.0065	0.032	0.81751	-0.23927	1991	71	110	2676	48	110	3092	220	3092	220	127.9	427.8	507000	163	5.8	0.11	16.53	2.05	1.56	62.4	47.8	13030	NA	534	148.2	15.9	n
928	s171006_80	Mcdills25	13.79	0.47	1.4	0.437	0.015	0.026	0.2384	0.0058	0.032	0.73956	0.14487	2329	69	120	2726	33	95	3099	210	3099	210	189	318	501000	280	10.1	0.021	11.72	4.81	2.4	177.8	90.4	10290	NA	543	139.7	32.6	n
929	s171006_81	Mcdills25	0.89	0.12	0.15	0.0926	0.0034	0.0056	0.076	0.011	0.015	0.22684	-0.0060966	571	20	33	631	68	82	730	380	571	33	252.3	134.1	510000	550	17.2	10.7	63	23.9	4.99	160.9	44.3	9540	NA	48	3.83	12.48	y
930	s171006_82	Mcdills25	2.54	0.3	0.38	0.1533	0.003	0.0079	0.126	0.015	0.022	-0.17783	0.28653	919	17	44	1241	76	97	1840	270	1840	270	679	420	546000	567	12.2	0.175	67	9.3	6.6	367	173.2	11290	NA	243	36.2	40	n
931	s171006_83	Mcdills25	19.67	0.47	1.9	0.565	0.011	0.029	0.2634	0.0067	0.035	0.19742	0.38131	2886	44	120	3070	23	92	3263	210	3263	210	172	232	508000	222	3.5	0.0036	21.8	1.27	1.71	72.3	53.8	11630	NA	503	144.2	33.9	n
932	s171006_84	Mcdills25	0.88	0.1	0.13	0.0941	0.004	0.006	0.0701	0.0082	0.012	0.34917	0.094716	579	23	35	609	59	75	670	380	579	35	187	109.9	492000	297	25.1	0.236	42.1	16.4	6.27	150	38.9	8600	NA	41.3	3	10.5	y
933	s171006_85	Mcdills25	21	0.52	2	0.643	0.013	0.034	0.2477	0.0057	0.033	0.59858	0.28159	3198	53	130	3137	25	98	3175	190	3175	190	133	345	492000	254	4.5	0.011	18.4	3.23	1.72	105.6	64.1	9880	NA	846	226.1	40.5	y
934	s171006_86	Mcdills25	14.41	0.25	1.4	0.5317	0.0084	0.027	0.2049	0.0031	0.027	0.57191	0.50852	2747	35	110	2774	17	89	2865	200	2865	200	55.1	1563	486000	326	6.6	0.0028	3.52	1.14	1.41	55.2	127.3	12400	NA	3201	712	9.96	y
935	s171006_87	Mcdills25	8.26	0.48	0.9	0.2462	0.0039	0.012	0.251	0.011	0.035	0.63175	-0.37486	1418	20	64	2236	52	98	3155	220	3155	220	224	1583	471000	162	10.6	0.045	26.6	3.02	2.21	62.8	79	11820	NA	1511	421	330	n
936	s171006_88	Mcdills25	3.585	0.099	0.35	0.2743	0.0036	0.014	0.0985	0.0023	0.013	0.37076	0.14042	1562	18	69	1542	22	77	1584	250	1584	250	22.5	1205	480000	1093	6.1	-0.000555	2.79	0.081	0.216	110	238.6	13240	NA	1271	135.4	3.35	y
937	s171006_89	Mcdills25	19.83	0.6	1.9	0.619	0.013	0.032	0.2423	0.0064	0.032	0.44857	0.32404	3102	51	130	3075	29	94	3123	210	3123	210	141.6	184.7	493000	171	5.6	-0.000541	35.3	0.77	0.93	56	52.2	10780	NA	440	116	44.1	y
938	s171006_9	Mcdills25	5.14	0.19	0.51	0.2919	0.0061	0.015	0.1161	0.005	0.016	0.21209	0.36567	1650	30	76	1834	32	86	1860	250	1860	250	343	319	467000	383	17.7	0.095	35.5	12.8	6.04	310	197	8240	NA	327	43.3	54.7	n
939	s171006_90	Mcdills25	15.91	0.45	1.5	0.4902	0.0079	0.025	0.2452	0.0067	0.033	0.37709	0.31924	2570	34	110	2865	27	92	3141	210	3141	210	179.6	237.5	492000	312	13.2	0.008	58	4.39	4.07	106.7	52.4	8750	NA	447.9	119.1	45.9	n
940	s171006_91	Mcdills25	12.78	0.35	1.2	0.4928	0.0081	0.025	0.1953	0.0059	0.026	-0.051295	0.56974	2581	35	110	2658	25	90	2781	230	2781	230	153	185.4	501000	208	6.2	0.005	45.3	2.16	0.7	68.8	43.6	10720	NA	351	73.7	35.9	y
941	s171006_92	Mcdills25	0.818	0.06	0.097	0.0939	0.0023	0.0051	0.0672	0.0055	0.01	-0.049494	0.34887	579	13	30	597	33	53	760	330	579	30	147	533	521000	138	7.9	0.01	8.1	0.31	0.97	32.5	32.6	10590	NA	191.8	13.81	4.49	y
942	s171006_93	Mcdills25	9.29	0.23	0.89	0.3509	0.0067	0.018	0.2017	0.0048	0.027	0.58953	0.4878	1944	30	81	2363	23	89	2830	220	2830	220	500	766	483000	355	14.6	0.043	56.4	4.3	3.91	105	41.3	12040	NA	1041	226.7	82.7	n
943	s171006_94	Mcdills25	6.49	0.42	0.73	0.2943	0.0067	0.016	0.1633	0.0073	0.023	0.62879	-0.14946	1661	34	78	2017	53	93	2467	240	2467	240	179.5	389	485000	558	9.4	0.052	10.5	1.46	0.79	135	78.8	11830	NA	439.8	79	24	n
944	s171006_95	Mcdills25	4.87	0.21	0.5	0.2168	0.0038	0.011	0.1706	0.0072	0.023	0.079669	0.30298	1265	20	59	1786	36	86	2531	230	2531	230	271.7	354	540000	234	29.2	-0.000582	17.96	1.5	1.2	65.1	42.7	13310	NA	296.3	54.5	28.1	n
945	s171006_96	Mcdills25	1.93	0.11	0.21	0.187	0.0034	0.0096	0.0772	0.0041	0.011	0.1957	0.16734	1104	19	52	1079	37	73	1070	320	1104	52	239.7	424	483000	442	8.6	-0.000551	6.17	2.78	0.3	152.4	74.5	11260	NA	307.6	26	24.3	y
946	s171006_98	Mcdills25	5.1	0.17	0.5	0.314	0.0081	0.017	0.1237	0.0036	0.017	0.54411	0.11769	1758	40	84	1829	29	83	1993	250	1993	250	146	415	492000	186	8	-0.000551	10.6	0.51	0.27	43	53.3	12940	NA	505	67.5	20.7	n
947	s171006_99	Mcdills25	6.95	0.2	0.67	0.3832	0.0062	0.019	0.1372	0.0038	0.018	0.31066	0.28608	2090	29	90	2104	24	81	2176	240	2176	240	154	342	491000	515	11.5	-0.000539	3.32	1.56	0.231	132.8	68.2	11270	NA	508	74.8	30.3	y
948	s171009_0	Mcdills27	1.96	0.15	0.27	0.2029	0.0041	0.0064	0.0696	0.005	0.011	0.068763	0.14003	1190	22	34	1076	51	92	790	340	1190	34	88.6	153.6	432000	477	6.1	-0.000348	6.04	1.68	1.21	62.9	6.93	11380	NA	115.9	9.32	5.37	n
949	s171009_1	Mcdills27	0.836	0.051	0.11	0.1042	0.0015	0.0029	0.0578	0.0036	0.0089	0.11104	0.12538	640.8	9.1	18	609	28	59	440	320	640.8	18	189.4	395.7	462000	361	9.2	0.077	24.86	1.51	0.85	65.4	33.2	12120	NA	152.6	10.32	7.39	y
950	s171009_10	Mcdills27	9.3	0.26	1.1	0.44	0.0083	0.014	0.1522	0.0031	0.022	0.64935	0.27775	2348	37	61	2362	26	110	2362	250	2362	250	915	651	491000	259	8.2	0.069	54.7	8.1	2.18	182.2	89.8	9350	NA	1069	189.7	160.9	y
951	s171009_100	Mcdills27	11.63	0.26	1.3	0.4765	0.0073	0.014	0.1779	0.004	0.025	0.60325	0.21307	2511	32	60	2571	21	110	2623	240	2623	240	166.3	534	533000	216	4.8	-0.000666	12.21	1.26	0.38	68.3	52.9	12780	NA	1019	199.1	37.8	y
952	s171009_101	Mcdills27	1.24	0.11	0.18	0.0972	0.0022	0.0033	0.0927	0.0075	0.015	0.25012	0.048642	598	13	19	797	50	82	1310	350	598	19	605	478	551000	189	9.7	0.0041	12.55	5.31	2.77	126	29.1	12510	NA	186.4	19.7	28.7	n
953	s171009_102	Mcdills27	0.73	0.032	0.089	0.089	0.0014	0.0026	0.0598	0.0024	0.0088	0.37923	-0.029028	549.4	8	15	553	19	52	552	320	549.4	15	748	1976	530000	433	7.5	0.31	17	3.99	1.69	168.9	133.9	13370	NA	693	45.3	39	y
954	s171009_103	Mcdills27	0.768	0.057	0.1	0.0914	0.0023	0.0032	0.0619	0.0047	0.0099	0.083926	0.19019	564	14	19	569	33	60	550	340	564	19	652	480.8	562000	291	5.5	0.075	43.1	3.79	6.5	156	45.6	13650	NA	173.8	11.79	12.25	y
955	s171009_104	Mcdills27	14	0.64	1.7	0.551	0.013	0.019	0.1818	0.0086	0.027	0.24045	0.24853	2826	53	77	2741	43	110	2648	240	2648	240	164.5	206.8	511000	470	10.6	-0.000747	24.9	5.1	0.49	212.4	108.2	10290	NA	462	92	43.8	y
956	s171009_105	Mcdills27	2.195	0.069	0.26	0.0774	0.001	0.0021	0.2053	0.006	0.03	0.31623	0.22167	480.7	6.1	13	1175	22	81	2853	240	2853	240	1405	2138	565000	1302	34.6	0.29	167.4	24.4	36	730	247.7	20210	NA	649	147.7	131.8	n
957	s171009_106	Mcdills27	4.45	0.18	0.54	0.2952	0.0063	0.0096	0.1101	0.0039	0.016	0.35088	0.080255	1666	31	48	1718	34	100	1772	270	1772	270	160.2	293	544000	529	8.6	-0.00065	9.95	1.88	1.95	135	81.7	12850	NA	337	41.3	16.73	y
958	s171009_107	Mcdills27	2.09	0.16	0.29	0.1816	0.0057	0.0072	0.0841	0.0062	0.013	0.12852	0.23134	1075	31	39	1142	59	110	1280	340	1075	39	112.7	198.7	533000	271	7.1	0.113	10.13	1.01	1.05	85.8	49.7	12600	NA	140.2	13.1	8.48	n
959	s171009_108	Mcdills27	1.75	0.11	0.23	0.1005	0.0022	0.0033	0.126	0.0076	0.019	0.22858	0.20389	617	13	19	1009	42	84	1990	260	1990	260	459	794	522000	375	7.5	0.063	21.4	2.64	4.29	154	72.9	13510	NA	313	43.3	28.8	n
960	s171009_109	Mcdills27	3.8	0.23	0.49	0.2812	0.0076	0.01	0.0993	0.0061	0.015	0.11653	0.28165	1595	38	52	1576	53	110	1530	330	1530	330	69.6	111.6	523000	273	12.6	-0.000694	9.19	1.12	0.33	83.9	55.5	10560	NA	121.8	13.4	10.08	y
961	s171009_11	Mcdills27	4.06	0.12	0.48	0.2923	0.0042	0.0083	0.1003	0.0029	0.014	0.24258	0.29943	1652	21	41	1641	23	95	1611	270	1611	270	146.4	744	487000	196	6.2	-0.000532	8.97	0.4	0.3	51.3	40.7	13090	NA	813	93.8	18.96	y
962	s171009_110	Mcdills27	2.579	0.084	0.31	0.148	0.0039	0.0053	0.1282	0.0039	0.018	0.58906	0.34252	889	22	30	1293	25	89	2055	250	2055	250	1419	1573	483000	1080	88	0.26	149.8	25.2	25.9	510	181.5	10920	NA	914	130	125.8	n
963	s171009_111	Mcdills27	1.721	0.068	0.21	0.1637	0.0026	0.0048	0.0765	0.0029	0.011	0.22132	0.22267	977	15	27	1010	25	78	1066	310	977	27	428	931	497000	676	6.4	0.75	25.4	4.1	3.72	164.8	72.8	11840	NA	589	49.8	30.4	y
964	s171009_112	Mcdills27	0.724	0.045	0.094	0.0931	0.002	0.003	0.0571	0.0035	0.0088	0.21939	0.16334	574	12	18	555	29	61	440	340	574	18	1000	565	509000	228	10.8	0.01	64.7	3.37	2.3	88.2	49.1	11660	NA	202.5	12.71	45.8	y
965	s171009_113	Mcdills27	0.838	0.05	0.11	0.0854	0.002	0.0029	0.0708	0.0038	0.011	0.21728	0.22787	528	12	17	611	27	59	890	330	528	17	714	768	492000	200	10.7	0.44	47.1	6.2	3.86	83.9	36.2	12440	NA	252.9	19.8	29.3	n
966	s171009_115	Mcdills27	7.84	0.22	0.92	0.37	0.011	0.014	0.1559	0.0046	0.022	0.59418	0.64431	2024	53	68	2207	25	110	2395	240	2395	240	752	697	504000	999	21.5	0.037	29.2	8	7.9	343	166.7	11260	NA	977	172	82.3	n
967	s171009_116	Mcdills27	1.297	0.065	0.16	0.1355	0.0026	0.0042	0.0684	0.003	0.01	0.40091	0.092956	819	15	24	836	29	72	840	330	819	24	262.9	377	554000	417	6.2	28.8	100	74	2.16	303.9	135	11540	NA	197.3	15.07	12.69	y
968	s171009_117	Mcdills27	16.59	0.79	2	0.467	0.02	0.023	0.2587	0.0095	0.038	0.66655	0.19138	2461	88	100	2891	47	120	3226	230	3226	230	221	130	566000	98	4.4	-0.000679	36.2	1.01	1.49	52.3	33	12040	NA	234	68.1	21.4	n
969	s171009_118	Mcdills27	1.31	0.38	0.41	0.0988	0.0034	0.0042	0.078	0.015	0.018	0.90495	-0.75253	607	20	24	724	99	110	960	350	607	24	433	380.4	531000	285	12.1	0.054	63.8	6.7	4.6	146.6	47.3	10720	NA	145.9	14.9	27.4	n
970	s171009_119	Mcdills27	1.575	0.098	0.2	0.1627	0.0036	0.0054	0.0709	0.0047	0.011	0.017749	0.36774	971	20	30	952	38	78	870	320	971	30	33.8	242	505000	391	4.3	-0.000666	0.85	0.56	0.022	71.8	63.3	14820	NA	151.1	11.96	3.68	y
971	s171009_12	Mcdills27	2.35	0.87	0.91	0.1151	0.0083	0.0088	0.113	0.027	0.031	0.9509	-0.81118	699	47	49	950	160	170	1200	400	699	49	229.2	181.4	503000	800	430	7.9	49.7	22.3	5.53	186	54.8	10130	NA	79.8	12.9	20.7	n
972	s171009_120	Mcdills27	11.97	0.5	1.5	0.43	0.011	0.016	0.1992	0.0048	0.028	0.78172	0.023107	2303	52	70	2587	40	110	2808	240	2808	240	244.6	381.3	512000	190	28.1	0.9	15.6	2.04	0.6	62.3	63.2	11000	NA	640	143.7	46	n
973	s171009_121	Mcdills27	3.16	0.14	0.39	0.1499	0.0037	0.0052	0.1545	0.0073	0.023	0.37888	0.11291	900	21	29	1435	36	97	2350	260	2350	260	959	1142	490000	1280	26.9	0.149	50	16	22.6	591	237.7	13510	NA	656	114.6	84.2	n
974	s171009_122	Mcdills27	13.06	0.42	1.5	0.5135	0.0087	0.015	0.1861	0.0057	0.027	0.27504	0.2504	2670	37	65	2675	31	110	2689	240	2689	240	166	166.2	535000	417	17.6	0.3	20.4	3.19	1.77	121.4	67.9	11510	NA	327.3	68.9	26.1	y
975	s171009_123	Mcdills27	3.664	0.091	0.43	0.1221	0.0048	0.0057	0.2222	0.0087	0.033	0.09412	0.85357	741	28	33	1560	20	95	2980	250	2980	250	994	1962	531000	1071	19.3	0.109	145.4	11.4	17	371	226.2	15180	NA	922	227.4	183	n
976	s171009_124	Mcdills27	0.881	0.087	0.13	0.0993	0.0027	0.0036	0.0652	0.007	0.012	0.066652	0.26315	610	16	21	619	49	74	560	360	610	21	134	208.4	556000	265	16.3	-0.000773	13	5.27	4.57	155	46.5	10800	NA	80.5	5.75	4.25	y
977	s171009_125	Mcdills27	3.65	0.11	0.43	0.215	0.005	0.0073	0.1216	0.0037	0.018	0.43343	0.29599	1255	27	39	1558	24	93	1967	260	1967	260	464	1546	510000	771	29.6	0.2	21.6	3.3	5.83	171.3	174.5	13770	NA	1313	178.7	60.9	n
978	s171009_126	Mcdills27	1.37	0.091	0.18	0.1343	0.0051	0.0061	0.0751	0.005	0.012	0.30784	0.16868	811	29	34	861	40	80	950	330	811	34	371	402	559000	334	25	1.6	43.1	9	2.78	206	91.1	13080	NA	205.2	17.2	11.57	y
979	s171009_127	Mcdills27	0.995	0.053	0.13	0.0835	0.0015	0.0026	0.0869	0.0046	0.013	0.1147	0.16302	517	9.1	15	694	27	63	1290	310	517	15	42.9	744	577000	219	3.1	0.008	20.7	1.47	2.41	52.3	21.2	14780	NA	238	23.1	9.05	n
980	s171009_128	Mcdills27	18.01	0.51	2.1	0.526	0.012	0.018	0.2491	0.0039	0.035	0.80215	0.20084	2719	52	75	2983	27	110	3174	230	3174	230	688	1020	482000	488	31.6	0.096	64.6	10.3	16.1	295	86.9	13370	NA	2042	573	61.9	n
981	s171009_129	Mcdills27	0.715	0.056	0.099	0.0884	0.0025	0.0033	0.0604	0.005	0.0099	0.02652	0.25947	546	15	19	543	34	61	480	340	546	19	452	374.5	546000	245	6.5	0.035	43.2	2.9	4.7	121	53	12860	NA	127.1	8.62	16.6	y
982	s171009_13	Mcdills27	0.769	0.066	0.11	0.1022	0.0027	0.0037	0.0552	0.0048	0.0092	-0.010574	0.27341	627	16	22	572	37	61	300	340	627	22	333	316	5.00E+05	510	10.2	9.8	86	15.4	3.74	70.1	31.3	9490	NA	121.2	7.66	18.1	y
983	s171009_130	Mcdills27	2.244	0.081	0.27	0.1585	0.0026	0.0047	0.1028	0.0038	0.015	0.25331	0.311	948	15	26	1189	26	86	1656	280	1656	280	705	722	505000	1039	22.8	1.33	50.4	16.8	11.38	315	153.1	14050	NA	444	51.8	40.4	n
984	s171009_131	Mcdills27	3.807	0.076	0.44	0.2838	0.004	0.008	0.0974	0.0019	0.014	0.35907	0.30761	1610	20	40	1592	16	91	1564	270	1564	270	179	1399	511000	139	5.1	0.026	66.5	0.42	0.34	34.8	70.8	12700	NA	1529	167.8	22.1	y
985	s171009_132	Mcdills27	1.75	0.12	0.23	0.1673	0.0039	0.0057	0.0737	0.0044	0.011	0.28121	0.26762	996	22	31	1010	43	82	980	340	996	31	96.8	286	515000	698	6.2	-0.000701	2.29	2.28	0.91	153.3	98.1	11930	NA	184.2	15.32	8.29	y
986	s171009_133	Mcdills27	1.15	0.11	0.17	0.0939	0.0037	0.0043	0.09	0.0083	0.015	0.42455	-0.13004	578	22	26	758	50	77	1280	300	578	26	2410	1314	535000	655	19.4	0.104	98	12.7	22.1	432	108.4	14960	NA	476	49.2	39.8	n
987	s171009_134	Mcdills27	10.16	0.66	1.3	0.415	0.022	0.024	0.1771	0.0071	0.026	0.78672	-0.25476	2220	100	110	2407	70	140	2594	250	2594	250	167.2	168.2	549000	316	19.3	0.006	16.3	3.22	3.87	152.9	74.2	12240	NA	263.9	52.9	16.91	n
988	s171009_135	Mcdills27	0.828	0.061	0.11	0.103	0.0024	0.0035	0.0594	0.0045	0.0095	0.13226	0.29513	632	14	20	607	35	65	460	340	632	20	120.5	372	504000	192	7.7	-0.000686	5.19	1.62	0.181	57.3	31.8	12070	NA	146.8	9.74	6.12	y
989	s171009_136	Mcdills27	0.856	0.045	0.11	0.0812	0.0014	0.0024	0.0763	0.0038	0.011	0.35731	-0.036019	503.4	8.4	15	622	24	58	1040	310	503.4	15	585	910	490000	187	8.9	1.5	49.3	3.8	3.5	73	36.6	11960	NA	284.3	24.3	29.4	n
990	s171009_137	Mcdills27	1.533	0.082	0.19	0.1358	0.0033	0.0047	0.0819	0.0044	0.012	0.25603	0.28887	820	19	27	937	33	78	1190	310	820	27	859	552	551000	915	16.6	0.01	65.6	4.5	5.69	337	149.6	14000	NA	296	27	18.3	n
991	s171009_138	Mcdills27	1.95	0.22	0.32	0.188	0.0063	0.0078	0.0773	0.0087	0.014	0.057883	0.17761	1109	34	42	1048	82	120	850	390	1109	42	28.4	75	503000	223	7	-0.000723	4.02	0.18	0.065	51.9	48.6	10920	NA	54.1	4.64	2.88	n
992	s171009_139	Mcdills27	3.208	0.08	0.37	0.0821	0.0013	0.0024	0.2831	0.0054	0.04	0.61937	0.084745	508.6	7.9	14	1459	20	93	3373	220	3373	220	3273	2358	513000	1321	52.6	0.69	176.3	59.1	52.3	997	234.5	12360	NA	753	240.3	276.3	n
993	s171009_14	Mcdills27	0.636	0.031	0.078	0.0834	0.0012	0.0024	0.0551	0.0027	0.0082	0.14135	0.16943	516.2	7.3	14	499	20	50	380	320	516.2	14	73.6	1311	501000	468	1.3	0.009	0.85	0.43	0.105	111.7	75.2	14930	NA	409.5	26.3	3.3	y
994	s171009_140	Mcdills27	0.76	0.1	0.14	0.0889	0.0036	0.0042	0.066	0.01	0.014	0.05986	0.20877	549	21	25	562	65	85	510	410	549	25	185	208	546000	140	8.9	-0.000665	18.5	2.31	1.67	28.8	5.77	16200	NA	70.7	4.99	5.75	y
995	s171009_141	Mcdills27	2.109	0.098	0.26	0.1973	0.0037	0.0061	0.0791	0.0038	0.012	0.30731	0.093739	1160	20	33	1153	35	92	1116	300	1160	33	184.1	348.1	522000	221	4.2	-0.00063	22.7	0.69	0.84	68.5	48.5	12680	NA	265.2	23.2	15.91	y
996	s171009_142	Mcdills27	3.96	0.17	0.48	0.2775	0.0039	0.0078	0.1038	0.0044	0.015	0.10625	0.17703	1578	20	40	1621	36	100	1665	290	1665	290	505	251	548000	268	7.4	-0.000651	38.3	1.84	1.45	106.2	66.5	12980	NA	269.6	31.3	37.9	y
997	s171009_143	Mcdills27	3.43	0.12	0.41	0.2417	0.004	0.0071	0.1023	0.0037	0.015	0.09811	0.39721	1398	22	39	1504	27	92	1636	270	1636	270	317.6	317.3	542000	262	6	0.084	43.1	1.38	1.7	83.7	68.3	13140	NA	296.9	34	25.6	n
998	s171009_144	Mcdills27	1.819	0.081	0.22	0.1679	0.0034	0.0053	0.0788	0.0034	0.012	0.29824	0.1067	1000	18	29	1044	30	81	1115	310	1000	29	516	483	536000	260	8.5	0.33	33.5	2.14	2.32	106.6	85.6	12480	NA	316	27.7	27.1	y
999	s171009_146	Mcdills27	6.93	0.3	0.84	0.4019	0.008	0.013	0.1238	0.005	0.018	0.36013	0.24081	2176	37	58	2089	39	110	1987	270	1987	270	79.4	193.6	499000	231	17.2	0.143	5.17	1.39	0.107	61.5	38.2	10910	NA	301	41.8	16.77	y
1000	s171009_147	Mcdills27	3.1	0.14	0.38	0.2559	0.0048	0.0079	0.0888	0.0042	0.013	0.21289	0.24306	1468	25	41	1426	37	99	1361	290	1468	41	165	283.9	506000	253	4.4	0.014	40.8	0.99	0.4	79.3	80.4	12530	NA	280.3	28.1	21.75	y
1001	s171009_149	Mcdills27	0.748	0.074	0.11	0.0895	0.0027	0.0035	0.061	0.0061	0.011	0.16968	0.14333	552	16	20	557	42	64	500	370	552	20	461	188.6	535000	171	7	0.223	98.9	20	5.14	72.1	17.4	11800	NA	64.8	4.36	17.2	y
1002	s171009_150	Mcdills27	0.98	0.1	0.15	0.1085	0.0036	0.0045	0.0682	0.0078	0.012	0.092001	0.22929	664	21	26	666	54	80	610	370	664	26	38.6	222.8	511000	216	1.74	-0.000744	0.84	1.53	0.21	59.2	29.2	11360	NA	94.3	6.89	3.02	y
1003	s171009_151	Mcdills27	3.63	0.15	0.44	0.2445	0.0058	0.0083	0.1083	0.0047	0.016	0.18192	0.3634	1409	30	43	1551	31	94	1741	270	1741	270	206	316.2	490000	846	6	0.27	8.22	3.38	2.41	155	124.6	12430	NA	296.7	36.2	18.6	n
1004	s171009_152	Mcdills27	0.716	0.079	0.11	0.092	0.0024	0.0033	0.0569	0.0064	0.01	0.03372	0.17735	567	14	19	528	46	66	290	350	567	19	136.7	249.8	508000	402	9.8	-0.000721	3.54	3.05	0.24	148.5	86.5	10390	NA	89.1	5.66	6.62	y
1005	s171009_153	Mcdills27	11.85	0.36	1.4	0.424	0.01	0.015	0.2022	0.0036	0.029	0.79695	0.31026	2277	48	67	2585	29	110	2837	230	2837	230	1623	1203	476000	763	30.3	0.23	129	18.3	17.3	432	141.5	13120	NA	1937	443	144.2	n
1006	s171009_154	Mcdills27	11.2	0.39	1.3	0.508	0.011	0.017	0.1594	0.0052	0.023	0.41123	0.38595	2647	47	71	2530	32	110	2428	250	2428	250	113.1	230	502000	514	3.9	7.8	48.9	12.1	0.99	63.8	48.6	11310	NA	442	79.6	26.5	y
1007	s171009_155	Mcdills27	0.708	0.049	0.094	0.0946	0.0021	0.0031	0.0544	0.0038	0.0086	0.077601	0.184	583	12	18	536	30	57	330	340	583	18	293.3	493	513000	328	2.6	0.91	20.8	6.9	1.13	134.6	71.1	11610	NA	179	11.01	14.64	y
1008	s171009_156	Mcdills27	6.86	0.13	0.79	0.3593	0.0052	0.01	0.1377	0.0019	0.02	0.63023	0.2103	1978	25	48	2091	17	100	2194	240	2194	240	446	1309	503000	265	11.5	0.01	16.5	2.74	4.18	96.3	21.9	13960	NA	1818	284.7	15.1	y
1009	s171009_157	Mcdills27	0.836	0.041	0.1	0.0992	0.004	0.0047	0.0614	0.0025	0.009	0.60279	0.11784	609	23	27	612	23	58	628	300	609	27	195	1140	524000	353	2.19	-0.000687	3.28	0.69	0.38	89.2	72.2	15210	NA	437	30.2	14.3	y
1010	s171009_158	Mcdills27	0.899	0.068	0.12	0.0925	0.0018	0.0029	0.0712	0.0052	0.011	0.50277	-0.16544	570	11	17	643	34	61	870	320	570	17	956	775	498000	251	12.6	0.049	16.5	2.1	3.09	112.4	74.3	13340	NA	271	21.5	15.97	n
1011	s171009_159	Mcdills27	4.76	0.17	0.57	0.2647	0.0052	0.0083	0.1306	0.0053	0.019	-0.10748	0.64988	1513	27	43	1775	31	100	2099	280	2099	280	993	638	537000	259	9.5	0.014	68.1	3.34	6.37	163	78.6	12970	NA	652	98.3	73.5	n
1012	s171009_16	Mcdills27	0.75	0.11	0.14	0.0867	0.0029	0.0036	0.0651	0.0095	0.013	-0.089443	0.30739	536	17	21	549	62	80	560	430	536	21	221	450	494000	269	4.2	-0.000516	7.4	1.61	1.1	131	73.1	11930	NA	141	11.6	9.4	y
1013	s171009_160	Mcdills27	1.877	0.091	0.23	0.1785	0.0043	0.0061	0.0764	0.0037	0.011	0.21787	0.2564	1058	23	33	1063	31	80	1045	300	1058	33	164	403	503000	1409	5.8	-0.000637	5.34	4.8	0.54	431	214.7	12910	NA	276	23.6	10.9	y
1014	s171009_161	Mcdills27	0.726	0.094	0.13	0.0857	0.0026	0.0033	0.0601	0.0073	0.011	0.1027	0.10955	530	15	20	534	54	72	400	400	530	20	36.2	170.2	519000	64	2	-0.000633	3.37	0.018	0.38	31	18.7	13220	NA	56.6	3.97	0.54	y
1015	s171009_162	Mcdills27	1.749	0.06	0.21	0.1578	0.0025	0.0046	0.0802	0.0027	0.012	0.11462	0.29088	944	14	26	1026	23	79	1196	290	944	26	342	717	533000	922	13.5	0.043	17	5.7	5.75	312	147.8	15050	NA	439	40	12.47	y
1016	s171009_163	Mcdills27	5.92	0.14	0.69	0.2092	0.0042	0.0066	0.2051	0.0052	0.029	0.21938	0.36203	1224	22	35	1965	20	95	2864	220	2864	220	359	466.9	530000	175	248	0.35	29	7.3	2.43	78.8	69.7	12970	NA	375.2	87.4	18.04	n
1017	s171009_164	Mcdills27	1.773	0.074	0.21	0.1803	0.0026	0.0051	0.0714	0.0031	0.011	0.20119	0.15052	1068	14	28	1033	28	81	921	310	1068	28	517	467	529000	274	7.1	0.112	36	13	7.3	193.9	102.6	9110	NA	323.6	26.2	36.2	n
1018	s171009_165	Mcdills27	15.76	0.33	1.8	0.4854	0.0093	0.015	0.234	0.0031	0.033	0.72827	0.10304	2548	40	65	2859	20	110	3079	240	3079	240	446	785	531000	250	16.4	0.064	46.7	6	9.9	195	81.1	16140	NA	1473	393.4	45.7	n
1019	s171009_166	Mcdills27	0.797	0.081	0.12	0.0892	0.003	0.0037	0.0651	0.0068	0.011	0.15678	0.12362	550	18	22	573	49	73	560	390	550	22	131.4	180.7	534000	232	5.9	2.5	34.8	5	1.1	54.4	34.5	13640	NA	61.6	4.59	4.27	y
1020	s171009_167	Mcdills27	2.01	0.24	0.33	0.1013	0.0034	0.0042	0.141	0.016	0.025	0.44331	-0.20324	622	20	24	1059	77	110	2030	320	2030	320	407	204.9	514000	488	133	8.6	84.1	17.2	4.97	112.6	38.6	12530	NA	78.3	12.5	24.9	n
1021	s171009_168	Mcdills27	0.813	0.053	0.11	0.1016	0.0021	0.0032	0.0578	0.0036	0.0089	0.18052	0.088337	624	12	19	596	29	59	440	330	624	19	226.3	507	503000	762	8.3	-0.000695	3.15	3.18	0.85	202.2	85.3	11410	NA	198.6	13.03	7.13	y
1022	s171009_169	Mcdills27	2.09	0.1	0.26	0.1752	0.0046	0.0063	0.086	0.004	0.013	0.45778	0.17054	1040	26	35	1135	34	85	1286	290	1040	35	165.6	375	518000	334	8.4	0.042	24.1	1.72	1.59	110.4	94.7	13500	NA	251.5	24.6	20.62	n
1023	s171009_17	Mcdills27	4.39	0.3	0.58	0.177	0.0087	0.0097	0.1797	0.008	0.027	0.81987	-0.25708	1047	48	53	1679	59	110	2627	240	2627	240	89.9	389	488000	177	8.8	0.15	10.66	0.99	1.01	42.3	32.5	12470	NA	267.2	56	16.76	n
1024	s171009_170	Mcdills27	3.53	0.11	0.42	0.2562	0.0047	0.0079	0.0995	0.003	0.014	0.27137	0.30847	1470	24	40	1528	25	94	1603	270	1603	270	404	724	498000	865	14.2	-0.000685	9.5	2.54	4.35	207	170.3	12790	NA	709	80.3	19.09	y
1025	s171009_171	Mcdills27	1.373	0.07	0.17	0.0918	0.0018	0.0029	0.1063	0.0057	0.016	0.1183	0.27644	566	11	17	879	27	66	1722	250	1722	250	1119	1226	491000	450	10.1	2	29.5	7.3	3.62	214.2	120.1	11510	NA	440	53.3	59.3	n
1026	s171009_172	Mcdills27	0.673	0.066	0.1	0.0835	0.0019	0.0028	0.0583	0.0058	0.01	-0.094692	0.20918	517	11	17	515	37	57	410	320	517	17	149	297	499000	188	2.3	0.007	8.2	2.4	1.18	84.5	36.4	11080	NA	95.2	6.17	6.9	y
1027	s171009_173	Mcdills27	0.776	0.094	0.13	0.098	0.0036	0.0043	0.0562	0.007	0.011	0.17935	0.17159	602	21	25	556	54	75	270	370	602	25	477	147.3	501000	247	26.4	0.254	70.2	21.5	7.97	170.3	48.7	8720	NA	55.4	3.55	25.2	y
1028	s171009_174	Mcdills27	0.164	0.024	0.031	0.1671	0.003	0.0051	0.0717	0.0033	0.011	-0.44228	0.076148	996	16	28	150	21	26	921	310	996	28	168	492	502000	1033	9.6	0.016	2.92	5.8	0.141	317	145.1	11880	NA	343	27.8	15.7	n
1029	s171009_175	Mcdills27	20.3	0.65	2.4	0.58	0.014	0.02	0.2515	0.007	0.036	0.68116	0.19573	2943	58	82	3096	32	120	3187	230	3187	230	125.9	197.6	498000	211	4	-0.000641	17.7	0.67	1.01	49.6	57.7	11160	NA	434	126.8	27.8	y
1030	s171009_176	Mcdills27	0.641	0.078	0.11	0.0883	0.0033	0.0039	0.0537	0.0068	0.01	-0.13295	0.32928	545	19	23	488	51	69	190	360	545	23	176	198.2	507000	172	7.2	1.31	14.4	2.35	0.21	48.9	22.8	12540	NA	66.8	3.94	7.23	n
1031	s171009_177	Mcdills27	2.59	0.11	0.31	0.1219	0.0029	0.0042	0.1497	0.0066	0.022	0.24613	0.34941	741	17	24	1293	30	88	2319	260	2319	260	351	473	487000	610	22	1.59	26.5	10.7	2.67	216	74.3	10670	NA	227	39	37.6	n
1032	s171009_178	Mcdills27	4.08	0.12	0.48	0.2821	0.0047	0.0083	0.107	0.0031	0.015	0.4125	0.22815	1601	23	42	1649	26	100	1729	270	1729	270	435	871	496000	874	10.4	-0.000692	8.75	2.03	2	215.7	170.7	13970	NA	985	120.7	34.2	y
1033	s171009_179	Mcdills27	1.07	0.079	0.14	0.0885	0.0019	0.0029	0.0868	0.0067	0.014	0.12178	0.1617	547	11	17	726	37	68	1260	320	547	17	618	467	528000	636	14.9	1.75	54.1	19.4	13.9	235	33.9	11920	NA	156.2	15.8	30	n
1034	s171009_18	Mcdills27	2.455	0.095	0.3	0.1027	0.0037	0.0045	0.177	0.011	0.027	0.047106	0.66575	630	22	26	1251	29	90	2554	250	2554	250	769	938	473000	1328	37	0.169	238	25.6	30.3	573	142.2	11970	NA	374	72.9	64.8	n
1035	s171009_180	Mcdills27	0.83	0.071	0.12	0.1007	0.0024	0.0034	0.0591	0.0051	0.0097	-0.091199	0.30615	618	14	20	599	39	65	460	350	618	20	282	420	509000	170	9.5	-0.000758	28.9	6.8	0.99	165	59.3	10520	NA	160	10.8	14.6	y
1036	s171009_181	Mcdills27	0.776	0.073	0.11	0.0984	0.0033	0.0041	0.0571	0.0056	0.0098	-0.067952	0.37964	605	19	24	574	39	62	360	350	605	24	131.2	258.3	502000	193	7.7	0.005	19.42	1.13	0.52	57.8	31.1	11550	NA	94.8	6.27	6.59	y
1037	s171009_182	Mcdills27	1.68	0.11	0.22	0.175	0.0044	0.0062	0.0695	0.0046	0.011	0.020865	0.29666	1043	25	35	992	43	89	820	350	1043	35	266	275	505000	322	8.2	0.021	21.8	8.4	1.37	229	103.4	11160	NA	183.9	14.7	21.4	n
1038	s171009_183	Mcdills27	0.837	0.035	0.1	0.0992	0.0016	0.0029	0.0604	0.0024	0.0088	0.26521	0.11389	609.5	9.4	17	614	20	56	575	320	609.5	17	233	1052	503000	208	4.9	0.004	12.44	1.37	0.65	69.6	45.3	11290	NA	399	27.7	10.62	y
1039	s171009_184	Mcdills27	0.9	0.059	0.12	0.102	0.0022	0.0033	0.0633	0.0042	0.0099	0.0973	0.15497	626	13	19	642	31	62	610	320	626	19	202.1	397	5.00E+05	157	34.7	-0.000642	15.2	0.73	0.45	27.3	16.75	12830	NA	155.7	11.41	11.23	y
1040	s171009_185	Mcdills27	3.79	0.11	0.44	0.2746	0.0064	0.0093	0.0995	0.0029	0.014	0.39888	0.4991	1562	32	47	1585	23	94	1604	260	1604	260	170	749	511000	884	6.9	-0.000665	1.69	2.27	0.54	183.8	139.2	13130	NA	768	89.2	20.7	y
1041	s171009_186	Mcdills27	1.496	0.096	0.2	0.1557	0.0035	0.0052	0.0714	0.0044	0.011	0.22308	-0.0014972	932	20	29	914	39	80	870	330	932	29	75.4	243.5	503000	217	4.6	2.7	12	3.2	0.194	65.1	58	11400	NA	152.7	12.48	6.79	y
1042	s171009_187	Mcdills27	0.016	0.0035	0.0039	0.0984	0.0032	0.004	0.0575	0.0068	0.011	0.30012	0.21177	604	18	23	16	3.4	3.9	350	370	604	23	62.3	147.8	538000	227	5.6	-0.000604	11.93	0.35	0.41	47.1	40.1	13220	NA	60.9	4.02	2.97	n
1043	s171009_188	Mcdills27	1.26	0.1	0.18	0.0869	0.0024	0.0032	0.1048	0.008	0.017	0.26513	0.074577	537	14	19	811	45	79	1620	330	1620	330	555	378	519000	242	10.1	0.056	37.1	7.7	7.67	222.6	91	11080	NA	122.4	14.8	25.1	n
1044	s171009_189	Mcdills27	2.422	0.069	0.28	0.2061	0.0027	0.0057	0.0846	0.0025	0.012	0.23073	0.19716	1208	15	31	1245	21	85	1285	290	1208	31	184.3	1135	526000	413	3.3	-0.000574	4.92	0.83	0.93	82.1	93	14470	NA	932	91	2.79	y
1045	s171009_19	Mcdills27	1.6	0.12	0.22	0.0989	0.0015	0.0028	0.1155	0.0075	0.018	0.42288	-0.19621	608.1	8.6	17	951	46	84	1790	300	1790	300	990	1135	468000	793	16.2	0.72	28.1	15.2	4.79	277	136.7	14450	NA	430	58.7	66.1	n
1046	s171009_190	Mcdills27	1.748	0.08	0.21	0.1623	0.0028	0.0049	0.0846	0.0039	0.013	-0.31033	0.52085	969	16	27	1023	30	81	1255	280	969	27	432	963	489000	743	5.8	0.014	11.1	3.05	2.18	295	153.9	11450	NA	629	61.3	33.3	y
1047	s171009_191	Mcdills27	14.71	0.5	1.7	0.509	0.015	0.019	0.2076	0.0035	0.029	0.84392	0.2655	2645	64	83	2786	34	120	2881	230	2881	230	526	643	494000	232	10.6	0.007	16.59	1.77	2.49	129.1	104.3	11640	NA	1210	289.4	69.5	y
1048	s171009_192	Mcdills27	0.79	0.064	0.11	0.1047	0.0029	0.0039	0.0566	0.0054	0.0096	-0.19288	0.41928	642	17	22	584	38	66	320	340	642	22	50.9	206.1	511000	243	26.4	-0.000601	3.82	3.67	0.61	86.3	35.5	9570	NA	86.3	5.51	2.87	y
1049	s171009_193	Mcdills27	0.698	0.056	0.097	0.0861	0.0018	0.0028	0.0586	0.0049	0.0096	0.018527	0.19212	532	11	16	533	32	56	430	340	532	16	178.1	483	510000	242	8.2	0.0038	5.78	1.53	0.41	93.5	70	11260	NA	155.7	11	8.94	y
1050	s171009_195	Mcdills27	2.43	0.23	0.36	0.2262	0.008	0.0097	0.0817	0.008	0.014	0.29769	0.048635	1319	44	53	1225	75	120	1010	360	1319	53	28.8	75	504000	166	7.9	-0.000611	6.76	0.73	0.21	37.6	27	11830	NA	67.8	6.33	3.41	n
1051	s171009_196	Mcdills27	1.712	0.084	0.21	0.1755	0.0031	0.0053	0.0726	0.0033	0.011	0.17118	0.10146	1042	17	29	1009	30	75	967	290	1042	29	59.3	457	510000	581	6.3	-0.000613	0.63	0.54	0.125	130.9	60.4	13430	NA	321.4	26.8	5.65	y
1052	s171009_197	Mcdills27	0.839	0.062	0.11	0.1078	0.003	0.004	0.0569	0.0044	0.0092	0.16774	0.19465	660	18	23	614	36	65	400	340	660	23	116.3	230	508000	317	9.9	0.233	7.23	13.4	2.61	269	96.7	9240	NA	93.5	6.25	6.57	y
1053	s171009_198	Mcdills27	0.728	0.083	0.12	0.0861	0.003	0.0037	0.062	0.0073	0.011	0.17186	0.1499	532	18	22	533	49	69	480	370	532	22	171	146.3	505000	132	5.6	0.031	31.3	4.5	2.53	61.7	19.5	11970	NA	49.5	3.45	6.41	y
1054	s171009_199	Mcdills27	0.0636	0.0078	0.011	0.08	0.0021	0.0029	0.2128	0.0096	0.031	-0.17056	-0.35151	496	13	17	62.1	7.4	10	2917	230	2917	230	1953	1264	489000	936	52.5	0.37	278	51.5	49.7	924	125.5	10220	NA	424	106.6	129.1	n
1055	s171009_20	Mcdills27	13.47	0.62	1.7	0.533	0.013	0.019	0.1837	0.0081	0.027	0.29185	0.24177	2751	55	78	2696	43	110	2650	250	2650	250	30.4	71.7	491000	197	10.5	-0.000563	3.59	0.98	0.37	57.8	32.8	9500	NA	145.7	30.5	7.84	y
1056	s171009_200	Mcdills27	1.47	0.11	0.2	0.1365	0.0062	0.007	0.0813	0.0063	0.013	0.23436	0.31772	823	35	40	908	46	85	1080	340	823	40	77.4	224	502000	625	8.9	-0.000591	4.26	1.74	0.56	145.4	85.6	11930	NA	115.6	10.9	6.23	y
1057	s171009_201	Mcdills27	1.099	0.087	0.15	0.1173	0.0025	0.0038	0.0714	0.0045	0.011	0.48455	-0.078815	715	15	22	743	43	76	870	340	715	22	159	283.1	536000	579	10.8	-0.00063	7.9	1.56	0.92	136.4	76.7	13980	NA	135.1	10.97	3.95	y
1058	s171009_202	Mcdills27	13.58	0.4	1.6	0.5341	0.0081	0.015	0.1803	0.0046	0.026	0.47247	0.15304	2757	34	65	2719	27	110	2643	240	2643	240	119	268	507000	628	9.9	23	65	33.7	0.66	81.1	54.3	12280	NA	548	113.5	24.92	y
1059	s171009_203	Mcdills27	1.77	0.14	0.25	0.1519	0.0053	0.0065	0.0855	0.0065	0.014	0.36655	0.035566	910	29	36	1017	54	94	1200	350	910	36	33	140.9	503000	159	3.8	-0.000639	8.53	0.35	0.257	37.3	29.5	11320	NA	84.5	8.42	3.51	n
1060	s171009_204	Mcdills27	2.77	0.24	0.4	0.1012	0.0022	0.0033	0.196	0.016	0.032	0.755	-0.59563	621	13	19	1300	74	120	2630	360	2630	360	1190	1803	481000	1140	20.2	0.13	119	19.1	18.4	379	122.2	12930	NA	736	174	162	n
1061	s171009_205	Mcdills27	0.231	0.036	0.045	0.382	0.011	0.015	0.1808	0.0067	0.026	-0.19828	0.36886	2080	51	67	208	30	37	2631	260	2631	260	89.8	99.7	504000	362	7.5	0.053	37.4	1.9	0.93	87.9	58.5	11220	NA	158.2	33.2	19.4	n
1062	s171009_206	Mcdills27	3.07	0.12	0.37	0.1893	0.0046	0.0065	0.1217	0.0043	0.018	0.40868	-0.072751	1117	25	35	1417	30	94	1954	270	1954	270	70.2	526	510000	476	9.6	0.01	3.08	0.65	0.149	85.3	70.8	12330	NA	400	56.8	8.16	n
1063	s171009_208	Mcdills27	1.784	0.073	0.22	0.1578	0.0032	0.005	0.084	0.0033	0.012	-0.077124	0.40398	944	18	28	1032	27	81	1266	290	944	28	507	789	534000	260	9.3	0.029	25.9	2.89	2.92	136	106.4	15320	NA	501	49	26.6	y
1064	s171009_209	Mcdills27	0.831	0.042	0.1	0.0953	0.0016	0.0028	0.0635	0.0038	0.0097	0.19127	0.099837	586.8	9.4	17	610	23	56	690	320	586.8	17	540	1292	497000	547	11	0.5	32.9	3.8	6.8	169	67.3	13920	NA	495	36.4	11.9	y
1065	s171009_21	Mcdills27	0.772	0.049	0.1	0.0977	0.002	0.0031	0.0576	0.0038	0.009	0.013554	0.326	603	11	17	573	29	58	420	340	603	17	156.7	490	498000	259	7.1	-0.000518	25.62	1.15	0.33	64.7	44.6	12070	NA	182.1	11.92	7.57	y
1066	s171009_210	Mcdills27	0.88	0.12	0.16	0.1012	0.0034	0.0042	0.0629	0.0086	0.012	0.093515	0.084864	621	20	25	613	68	88	480	420	621	25	127.1	225	515000	216	12.2	0.135	21.2	9.6	3.09	111.7	36.8	9560	NA	86	6.6	7.19	y
1067	s171009_211	Mcdills27	1.97	0.31	0.38	0.1917	0.009	0.01	0.074	0.012	0.016	0.16811	0.046561	1127	49	55	990	110	140	570	420	1127	55	43.7	53.2	508000	269	11.6	-0.000889	5.11	2.59	2.59	123.7	65.2	9210	NA	38.4	3.2	3.98	n
1068	s171009_212	Mcdills27	1.256	0.086	0.17	0.1316	0.0045	0.0056	0.0662	0.0031	0.0098	0.72037	-0.14657	796	26	32	812	39	75	770	330	796	32	371	1034	490000	354	10.1	-0.000765	3.88	2.18	2.28	142.5	56.4	12290	NA	502	38.4	17.9	y
1069	s171009_213	Mcdills27	1.99	0.13	0.26	0.158	0.0027	0.0047	0.0898	0.0061	0.014	0.23532	0.011285	945	15	26	1102	43	88	1340	300	945	26	163	693	510000	930	6.2	0.042	6.3	2.18	1.14	230.5	143	13590	NA	421	44.3	19	n
1070	s171009_215	Mcdills27	1.93	0.14	0.26	0.1885	0.0048	0.0066	0.0731	0.0053	0.012	0.23689	0.13666	1112	26	36	1078	48	89	920	320	1112	36	107.2	191.5	497000	262	3.9	0.005	17.47	0.92	0.26	93.8	63.6	11710	NA	137.8	11.57	10.6	n
1071	s171009_216	Mcdills27	7.02	0.37	0.88	0.292	0.016	0.018	0.1737	0.0038	0.025	0.91392	0.1003	1639	81	89	2092	48	120	2591	230	2591	230	674	698	519000	274	12	0.02	17.4	2.7	3.35	116.2	79	13410	NA	785	158.6	53.5	n
1072	s171009_217	Mcdills27	1.743	0.084	0.22	0.1667	0.0033	0.0053	0.0746	0.0038	0.011	0.21166	0.19908	994	18	29	1021	33	85	1000	320	994	29	207.4	456	509000	278	3.3	-0.000767	16.97	2.46	0.57	150.3	86.4	10710	NA	291.3	25	20	y
1073	s171009_218	Mcdills27	1.58	0.1	0.21	0.1615	0.0059	0.0071	0.0709	0.0045	0.011	0.17493	0.23533	963	33	39	952	40	82	900	310	963	39	116.3	382	511000	154	6.1	-0.000715	5.41	2.53	1.01	133.2	62	9990	NA	234	19.5	6.95	y
1074	s171009_219	Mcdills27	0.095	0.015	0.018	0.2576	0.0045	0.0077	0.1014	0.002	0.014	-0.47302	0.27276	1477	23	40	90	14	17	1640	270	1640	270	224	1306	490000	198	5.9	-0.000633	7.21	1.33	1.05	69.3	13.4	13650	NA	1399	165.8	20.97	y
1075	s171009_220	Mcdills27	1.694	0.093	0.21	0.161	0.0035	0.0053	0.0757	0.0047	0.012	-0.082846	0.48343	962	20	29	995	35	81	990	310	962	29	131.9	302.1	502000	296	5.3	5.9	23.2	8.5	0.37	26.5	28.2	11750	NA	186.4	16.21	10.16	y
1076	s171009_221	Mcdills27	0.855	0.087	0.13	0.0995	0.0033	0.0041	0.061	0.0061	0.011	0.061485	0.21883	611	19	24	605	48	71	470	370	611	24	164.1	180.8	506000	810	11.7	10.9	52	24.2	2.2	117.9	42.2	10430	NA	67.9	4.8	6.74	y
1077	s171009_222	Mcdills27	2.09	0.26	0.35	0.175	0.015	0.015	0.0787	0.0055	0.012	0.91295	-0.58112	1032	81	85	1067	93	130	1090	330	1032	85	38.7	288	511000	146	4.4	-0.000809	3.66	-0.000718	0.165	23.7	15.7	13320	NA	190	18.4	4.7	y
1078	s171009_223	Mcdills27	2.45	0.21	0.35	0.1473	0.0042	0.0055	0.119	0.011	0.02	0.23988	0.051439	885	24	31	1223	58	97	1790	280	1790	280	59	414	505000	471	3.9	-0.000912	1.27	0.48	0.21	84.2	64.7	13070	NA	228.8	34	20.1	n
1079	s171009_224	Mcdills27	3.16	0.19	0.41	0.2702	0.0082	0.011	0.0873	0.0058	0.014	0.2126	0.2241	1541	42	54	1452	53	110	1320	310	1541	54	235	450	511000	341	9.9	0.011	44.7	3	0.84	130	104.8	14440	NA	445	44.3	24.4	n
1080	s171009_225	Mcdills27	0.778	0.078	0.12	0.0887	0.0027	0.0035	0.0617	0.006	0.011	0.089434	0.20947	548	16	20	566	44	66	510	360	548	20	223.3	384	509000	455	11.2	1.21	25	4	1.44	107.1	52.5	11870	NA	128.5	9.39	10.22	y
1081	s171009_226	Mcdills27	1.2	0.1	0.17	0.1366	0.0038	0.0051	0.0635	0.0059	0.011	-0.041729	0.36039	828	23	30	780	48	80	550	350	828	30	59.4	294	498000	431	10.3	2.18	22.1	4	0.32	152	107.5	13460	NA	153.5	10.99	5	y
1082	s171009_227	Mcdills27	1.28	0.1	0.18	0.131	0.0032	0.0045	0.0698	0.0056	0.011	0.13466	0.17903	793	18	26	824	47	82	790	340	793	26	169.7	343	545000	263	4.9	-0.000904	9.28	2.67	2.1	163.8	75.6	14770	NA	169	13.3	6.32	y
1083	s171009_228	Mcdills27	0.784	0.066	0.11	0.0893	0.0022	0.0031	0.0629	0.0056	0.011	-0.027587	0.31385	551	13	19	574	38	63	540	350	551	19	247.6	414	540000	235	11.7	-0.000879	18.8	0.82	0.86	43.8	35.8	13820	NA	140.5	10.26	10.48	y
1084	s171009_229	Mcdills27	3.28	0.13	0.39	0.2542	0.0046	0.0077	0.0907	0.003	0.013	0.43097	0.20643	1459	24	40	1467	30	92	1423	290	1459	40	252	718	511000	139	7.3	-0.001045	6.21	0.27	0.8	51.1	48.8	14830	NA	700	74	9.48	y
1085	s171009_23	Mcdills27	4.314	0.093	0.5	0.3043	0.0041	0.0085	0.1024	0.0021	0.015	0.37878	0.4472	1712	20	42	1693	18	97	1658	270	1658	270	240.1	1331	479000	261	2.71	-0.000524	3.43	0.42	0.42	83.1	96.7	14070	NA	1554	182	36.8	y
1086	s171009_230	Mcdills27	0.79	0.13	0.16	0.0993	0.0042	0.0048	0.058	0.01	0.013	-0.08626	0.31444	610	24	28	546	78	95	200	420	610	28	3.17	68.1	497000	69	6.2	-0.000524	1.64	-0.000485	0.056	11.6	9.61	9630	NA	25.6	1.66	0.145	n
1087	s171009_231	Mcdills27	0.9	0.051	0.11	0.0991	0.0022	0.0033	0.0638	0.0033	0.0096	0.35841	0.02375	609	13	19	644	27	61	680	340	609	19	501	454	486000	191	11.1	0.013	40.7	1.6	1.21	62.2	38.1	11570	NA	169.6	12.56	25.8	y
1088	s171009_232	Mcdills27	5.36	0.2	0.64	0.358	0.0059	0.011	0.106	0.0037	0.015	0.32841	0.19898	1972	28	50	1868	32	100	1702	280	1702	280	137.1	190.6	498000	173	6.8	0.017	17.21	6.1	1.38	85.5	34.5	10030	NA	262	32.3	22.81	n
1089	s171009_233	Mcdills27	2.73	0.093	0.32	0.167	0.0026	0.0048	0.1163	0.0041	0.017	0.43125	0.084544	995	14	27	1335	25	87	1872	270	1872	270	740	1571	489000	940	9.9	7.7	58.3	36.2	1.72	322.6	151.9	11790	NA	986	134.1	121.9	n
1090	s171009_234	Mcdills27	2.55	0.33	0.44	0.22	0.011	0.012	0.0784	0.0093	0.014	0.27341	0.14457	1280	57	64	1247	98	130	1040	430	1280	64	49	94.7	501000	470	7.5	2.72	15.1	6	0.72	46.3	36.3	10230	NA	80.2	7.32	5.38	n
1091	s171009_235	Mcdills27	12.26	0.37	1.4	0.4963	0.0085	0.015	0.1738	0.0052	0.025	0.40309	0.45892	2596	36	64	2617	28	110	2577	240	2577	240	136.2	179.5	496000	220	5.1	0.01	34.9	1.17	0.56	52.3	38.4	12460	NA	337.8	68.1	34	y
1092	s171009_236	Mcdills27	2.08	0.14	0.27	0.2033	0.0057	0.0076	0.0738	0.0051	0.012	0.10689	0.31619	1192	31	41	1128	45	90	950	320	1192	41	248.5	179.1	506000	326	18.8	0.072	49.9	2.98	0.78	103.9	66.9	11410	NA	135.5	11.65	24.2	n
1093	s171009_237	Mcdills27	9.74	0.4	1.2	0.454	0.011	0.016	0.1512	0.0064	0.022	0.15753	0.40607	2411	49	69	2396	38	110	2335	270	2335	270	165.9	117.7	532000	139	6.6	0.018	18.2	0.68	0.59	37.5	28.2	11810	NA	203	36	30.1	y
1094	s171009_238	Mcdills27	0.919	0.078	0.13	0.1103	0.0026	0.0038	0.059	0.0047	0.0096	0.20961	0.1725	674	15	22	646	40	67	440	330	674	22	50	341	499000	562	5.9	12.5	39.3	29	0.34	79.9	57.6	12850	NA	141.3	9.32	2.5	y
1095	s171009_239	Mcdills27	1.57	0.11	0.21	0.1544	0.004	0.0055	0.072	0.0051	0.011	0.25025	0.10438	925	22	30	939	44	84	890	320	925	30	69.4	250.5	493000	254	6.3	0.36	8.83	0.53	0.35	67.4	59.1	11410	NA	143.8	12.01	6.58	y
1096	s171009_24	Mcdills27	0.65	0.13	0.15	0.0922	0.0038	0.0044	0.05	0.011	0.013	-0.14678	0.27833	568	22	26	469	88	100	0	450	568	26	103.3	76.1	486000	188	20.3	-0.000534	24.1	2.72	0.86	33.3	14.24	11140	NA	26.7	1.56	5.69	n
1097	s171009_240	Mcdills27	5.21	0.38	0.7	0.191	0.014	0.015	0.199	0.01	0.03	0.82683	0.48976	1117	79	83	1813	66	120	2787	230	2787	230	349	254	524000	185	8	0.014	24.2	3.23	3.37	88.5	75	12500	NA	191	42.4	24.3	n
1098	s171009_241	Mcdills27	1.505	0.075	0.19	0.1515	0.0033	0.005	0.07	0.0032	0.01	0.29392	0.26775	909	18	28	924	30	75	880	330	909	28	223.3	441	506000	318	7.1	-0.00065	21.3	2.29	1.59	119.9	87.7	9380	NA	250.2	20.5	18.58	y
1099	s171009_242	Mcdills27	3.72	0.26	0.5	0.2515	0.0074	0.0096	0.1061	0.0071	0.017	0.45074	-0.067374	1444	38	50	1554	61	120	1630	310	1630	310	112.5	103.3	529000	414	7.3	0.121	30.1	2.45	1.03	125.1	98.2	12040	NA	98.2	12.13	17.34	n
1100	s171009_243	Mcdills27	12.82	0.46	1.5	0.506	0.013	0.018	0.1802	0.0059	0.026	0.53029	0.27431	2634	55	77	2661	35	120	2635	230	2635	230	81.5	137.1	501000	316	13.6	0.009	10.88	4.1	0.69	120.8	63.5	10550	NA	266.2	55.7	20.25	y
1101	s171009_244	Mcdills27	1.317	0.041	0.16	0.1064	0.0016	0.003	0.0879	0.0033	0.013	0.044537	0.50435	651.4	9.1	18	850	18	69	1345	290	651.4	18	399	1151	485000	393	9.3	0.0034	13.58	4.03	3.47	145.1	50.4	12180	NA	464.3	47.7	31.8	n
1102	s171009_245	Mcdills27	2.89	0.1	0.34	0.1129	0.0015	0.0032	0.1814	0.0073	0.027	0.24238	0.22629	689.2	8.8	18	1373	27	90	2635	240	2635	240	1048	1632	460000	1094	104.3	1.14	129.7	23.2	23.4	456	175.9	12190	NA	700	146.7	133.5	n
1103	s171009_246	Mcdills27	4.8	0.23	0.59	0.2808	0.0067	0.0096	0.1202	0.0044	0.017	0.61845	-0.16242	1594	34	48	1768	43	110	1941	270	1941	270	1360	494	483000	1202	17.1	0.5	128.6	11.3	6.71	352	157	10320	NA	535	76.8	178	n
1104	s171009_247	Mcdills27	0.659	0.034	0.082	0.0808	0.0012	0.0023	0.0574	0.0031	0.0086	0.17912	0.19495	500.9	7.3	14	510	21	50	440	320	500.9	14	40.4	1107	514000	121	1.96	-0.000607	2.98	0.64	1.98	41.1	7.21	12540	NA	337.7	22.5	1.58	y
1105	s171009_248	Mcdills27	0.862	0.074	0.12	0.092	0.0021	0.0031	0.066	0.0052	0.011	0.34243	-0.013457	567	12	18	615	41	68	660	350	567	18	323.9	400	501000	172	8.5	-0.000642	29.9	1.34	1.17	35.9	23.5	12560	NA	139.4	10.67	16.92	y
1106	s171009_249	Mcdills27	1.165	0.082	0.16	0.0979	0.0021	0.0032	0.083	0.0057	0.013	0.32228	-0.043105	602	12	19	771	37	69	1200	320	602	19	272	590	506000	81	5.4	-0.000694	8.5	0.86	2.14	68.7	22.2	15730	NA	219.6	21.1	10.4	n
1107	s171009_25	Mcdills27	0.895	0.055	0.12	0.0993	0.002	0.0031	0.066	0.0039	0.01	0.42805	-0.066709	610	11	18	641	29	61	720	320	610	18	255.6	606	489000	214	11.8	-0.000524	17.06	0.48	0.56	39.8	26.4	12920	NA	229.7	17.3	12.61	y
1108	s171009_250	Mcdills27	3.67	0.081	0.43	0.1974	0.0034	0.0059	0.1323	0.0031	0.019	0.29739	0.32131	1161	18	32	1562	18	92	2124	240	2124	240	818	1213	524000	812	15.2	0.039	32.2	4.22	6.24	259.3	163.7	15030	NA	903	139.2	66.3	n
1109	s171009_251	Mcdills27	1.496	0.078	0.19	0.1549	0.0033	0.005	0.0678	0.0034	0.01	0.16535	0.22335	928	18	28	920	31	75	810	330	928	28	68.3	505	514000	359	8.2	0.013	16.35	1.52	0.48	91	91.5	11310	NA	298	23.4	5.48	y
1110	s171009_252	Mcdills27	0.748	0.053	0.1	0.0874	0.002	0.003	0.0607	0.0044	0.0096	0.26886	0.020563	540	12	18	564	29	55	550	310	540	18	503	688	510000	252	12.7	0.065	23.7	9.8	2.58	116.2	65.6	10810	NA	230	16	25.6	y
1111	s171009_253	Mcdills27	5	0.18	0.6	0.1567	0.0043	0.0058	0.2241	0.0056	0.032	0.62438	0.32566	937	24	32	1811	30	100	2999	230	2999	230	511	872	492000	234	37.1	0.65	39.4	10.5	11.03	123.6	61.3	18990	NA	513	133.1	65.7	n
1112	s171009_254	Mcdills27	1.11	0.12	0.17	0.1054	0.0039	0.0047	0.0723	0.007	0.012	0.37433	-0.030545	646	23	27	742	55	81	880	360	646	27	978	493	463000	1000	8	24.5	109	41.9	4.08	268	86.3	9420	NA	201.9	16.6	49.8	n
1113	s171009_255	Mcdills27	2.122	0.095	0.26	0.2075	0.0036	0.0062	0.0725	0.0035	0.011	0.012268	0.33388	1215	19	33	1147	32	86	940	320	1215	33	263.2	402.7	506000	268	3.6	-0.000748	26.2	0.81	0.31	69.5	45.4	12650	NA	316.4	26.4	26.81	n
1114	s171009_256	Mcdills27	9.39	0.44	1.2	0.45	0.013	0.017	0.1486	0.0069	0.022	0.022093	0.48877	2389	59	76	2359	43	110	2284	270	2284	270	92.3	88.6	510000	277	7.6	0.119	11.92	5.58	0.97	150.8	63.9	10170	NA	151	25.8	19.8	y
1115	s171009_257	Mcdills27	0.83	0.1	0.14	0.1041	0.0038	0.0046	0.0573	0.007	0.011	0.042253	0.21722	638	22	27	586	56	76	310	380	638	27	544	175	506000	162	12.7	0.32	137	30.1	14.3	164	40.7	10510	NA	68	4.49	27.1	y
1116	s171009_258	Mcdills27	1.49	0.15	0.23	0.148	0.0044	0.0057	0.0699	0.0071	0.012	0.12922	0.16801	889	25	32	885	65	98	740	380	889	32	124	158.3	520000	194	9.3	0.166	13.81	1.72	1.29	66.9	37.3	11620	NA	88.6	7.13	4.37	y
1117	s171009_26	Mcdills27	0.735	0.066	0.11	0.0857	0.0022	0.003	0.0618	0.0052	0.01	0.30059	0.071564	530	13	18	552	41	66	540	360	530	18	121	339	479000	224	9.1	0.01	3.1	1.88	0.35	108.2	74.4	10490	NA	108	7.64	5.81	y
1118	s171009_27	Mcdills27	0.86	0.1	0.14	0.0882	0.0033	0.004	0.0726	0.0091	0.014	-0.052416	0.31895	544	20	23	610	59	82	730	400	544	23	384.4	105	5.00E+05	204	24.6	0.199	107.6	11.5	4.86	65.2	21.8	7950	NA	35.3	2.92	15.68	n
1119	s171009_28	Mcdills27	1.241	0.092	0.17	0.1242	0.0029	0.0042	0.0728	0.0055	0.012	0.24215	0.028936	754	16	24	802	42	77	900	320	754	24	245	306	499000	233	4.2	0.23	9.45	5.84	2.22	181	81.6	10530	NA	145.1	11.95	13.54	y
1120	s171009_29	Mcdills27	0.82	0.077	0.12	0.0987	0.0026	0.0035	0.0621	0.0062	0.011	0.062379	0.13656	607	15	21	600	44	68	580	360	607	21	220	617	535000	221	7.1	0.01	17.6	1.3	0.84	69.6	58.7	15960	NA	226.1	16	5.35	y
1121	s171009_3	Mcdills27	1.51	0.063	0.18	0.1504	0.0053	0.0064	0.0725	0.0026	0.011	0.63818	0.16582	902	29	36	933	28	80	979	310	902	36	672	598	453000	407	7.4	0.048	16.7	4.31	5.8	136	73.2	9830	NA	347	28.6	30.6	y
1122	s171009_30	Mcdills27	1.51	0.065	0.18	0.1506	0.0026	0.0045	0.0724	0.0029	0.011	0.33096	0.189	904	14	25	928	26	74	967	290	904	25	357	807	479000	173	5.4	0.058	23.51	1.71	0.97	83.8	66.4	11840	NA	473	38.4	23.7	y
1123	s171009_31	Mcdills27	2.14	0.11	0.27	0.1032	0.0023	0.0034	0.1499	0.0079	0.023	0.17925	0.29498	633	14	20	1156	36	86	2303	260	2303	260	179.8	286.1	505000	184	22.4	0.32	23.15	4.03	0.75	64.8	25.8	10150	NA	115.8	19.4	21.17	n
1124	s171009_32	Mcdills27	3.49	0.13	0.42	0.2664	0.0042	0.0078	0.0945	0.0033	0.014	0.29289	0.23581	1522	22	40	1516	31	96	1500	270	1500	270	138.5	449	483000	693	24.2	0.126	6.4	3.94	0.72	146.9	106.1	13040	NA	462	48.6	12.32	y
1125	s171009_33	Mcdills27	0.797	0.082	0.12	0.0906	0.0025	0.0033	0.0633	0.0064	0.011	0.064564	0.20816	558	15	20	574	48	72	580	390	558	20	299.5	163.6	476000	251	23.5	0.129	48.4	8.3	4.88	111.6	45.5	9250	NA	57.7	4.12	14.24	y
1126	s171009_34	Mcdills27	0.788	0.037	0.097	0.0969	0.0015	0.0028	0.0584	0.0027	0.0087	0.12921	0.1937	596.2	8.8	16	586	21	55	510	330	596.2	16	5.77	808	474000	467	9.3	-0.000507	0.34	0.018	0.101	89.6	31.5	13890	NA	306	20.1	0.35	y
1127	s171009_35	Mcdills27	1.667	0.084	0.21	0.1716	0.0031	0.0052	0.0709	0.0036	0.011	0.28255	0.21999	1020	17	29	987	31	78	890	310	1020	29	208.7	492	483000	870	5.5	1.09	5.67	3.9	0.36	183.1	115.5	12100	NA	327.8	26	13.31	n
1128	s171009_36	Mcdills27	0.886	0.063	0.12	0.1004	0.0031	0.0039	0.0631	0.0041	0.0098	0.32864	0.076215	616	18	23	639	36	67	660	350	616	23	304	436	486000	394	14.3	0.037	14.6	0.93	0.7	103	61.4	11910	NA	175	12.4	11	y
1129	s171009_37	Mcdills27	1.07	0.067	0.14	0.1094	0.0028	0.0039	0.0705	0.0046	0.011	-0.066077	0.37877	669	16	23	729	33	68	850	340	669	23	128.3	415	521000	235	12.9	-0.000582	22	1.34	0.82	85.9	92	12690	NA	174.6	13.79	9.21	y
1130	s171009_38	Mcdills27	0.714	0.056	0.099	0.0875	0.0019	0.0029	0.0602	0.0051	0.0099	-0.099841	0.36469	541	11	17	537	33	58	460	340	541	17	468	373	525000	508	8.5	6.6	44.4	18.8	9.4	201	41.6	11760	NA	127.4	8.41	17.26	y
1131	s171009_39	Mcdills27	3.6	0.18	0.45	0.2247	0.0068	0.0088	0.1168	0.0054	0.017	0.3692	0.32808	1305	36	46	1534	39	98	1861	270	1861	270	451	273.1	504000	1007	22.9	0.064	26	8.1	4.06	322	137.2	11470	NA	239	31.1	33	n
1132	s171009_4	Mcdills27	2.22	0.11	0.28	0.2184	0.0046	0.0071	0.0727	0.0032	0.011	0.43093	-0.018284	1272	25	37	1174	36	87	966	330	1272	37	133.4	270	475000	328	5.1	0.102	17.15	1.06	0.5	67.9	54.4	11820	NA	216	18.7	14.79	n
1133	s171009_40	Mcdills27	0.917	0.055	0.12	0.0859	0.0017	0.0027	0.0769	0.004	0.012	0.4089	0.0024765	531	10	16	653	28	60	1050	300	531	16	578	751	486000	261	9.8	5.9	43.9	14.8	5.23	197	63.2	10990	NA	251	21.04	26.05	n
1134	s171009_41	Mcdills27	2.16	0.12	0.27	0.1909	0.0049	0.0068	0.0818	0.0039	0.012	0.54199	-0.079944	1125	26	37	1155	39	89	1225	290	1125	37	646	376	501000	289	5.7	0.149	47.4	9.3	5.07	176	107.2	10600	NA	282	25.2	65.1	y
1135	s171009_42	Mcdills27	0.798	0.06	0.11	0.0893	0.0017	0.0028	0.0654	0.0049	0.01	0.018839	0.16732	551	10	16	585	34	62	650	340	551	16	99.7	531	487000	134	15.6	-0.000561	9.05	0.84	0.71	38.2	28.5	10950	NA	193.2	14.1	4.52	y
1136	s171009_43	Mcdills27	0.717	0.075	0.11	0.0902	0.0022	0.0031	0.0574	0.0059	0.01	0.14038	0.15805	556	13	18	531	44	65	330	360	556	18	490.8	254.7	482000	186	11.1	0.53	74.3	28.5	8.32	92.6	17.37	9120	NA	90.7	5.7	24.04	y
1137	s171009_44	Mcdills27	0.981	0.054	0.12	0.1124	0.0022	0.0035	0.0628	0.0031	0.0094	0.19519	0.10122	687	13	20	687	27	63	650	340	687	20	101.8	582	479000	276	9.1	0.005	3.4	2.72	0.44	142.4	113.1	8190	NA	255.7	17.9	6.22	y
1138	s171009_45	Mcdills27	3.62	0.13	0.43	0.2737	0.0047	0.0082	0.0959	0.0035	0.014	0.22828	0.31128	1559	24	41	1551	29	93	1511	290	1511	290	101.8	466	511000	807	7.6	0.005	2.26	0.94	0.194	181.1	135.5	13820	NA	496	52.2	9.13	y
1139	s171009_46	Mcdills27	1.183	0.087	0.16	0.1262	0.0031	0.0044	0.0681	0.0048	0.011	0.38306	0.035289	766	18	25	783	42	78	750	340	766	25	78.4	361	482000	621	11.2	0.2	3.28	1.24	0.18	146	91.2	12960	NA	180.2	13.6	5.51	y
1140	s171009_47	Mcdills27	1.267	0.099	0.17	0.1132	0.0023	0.0036	0.0786	0.0044	0.012	0.72654	-0.49189	691	13	21	814	42	74	1100	300	691	21	533	1031	488000	232	9.2	0.03	7	1.99	4.23	109	46.4	13470	NA	456	39.6	16.4	n
1141	s171009_48	Mcdills27	12.15	0.26	1.4	0.484	0.01	0.016	0.1821	0.0038	0.026	0.50037	0.37851	2559	44	68	2612	21	110	2664	230	2664	230	191.8	374.2	495000	293	5.5	0.069	16.4	2.3	0.5	135.3	70.1	11620	NA	711	142.7	44.9	y
1142	s171009_49	Mcdills27	0.163	0.026	0.032	0.1517	0.0037	0.0053	0.0771	0.0052	0.012	-0.19247	0.15771	910	21	30	148	22	27	1060	320	910	30	89.3	176.5	517000	559	15.1	0.015	4.35	4.09	1.01	191	60	12580	NA	115.2	9.89	5.89	n
1143	s171009_5	Mcdills27	1.91	0.061	0.23	0.1883	0.0024	0.0052	0.0736	0.0021	0.011	0.1215	0.29618	1112	13	28	1084	20	76	1006	300	1112	28	619	735	475000	330	17	-0.000483	32.4	7.3	0.7	417	190.5	10170	NA	517	44.7	60.4	n
1144	s171009_50	Mcdills27	2.97	0.11	0.36	0.2265	0.0047	0.0072	0.0949	0.0034	0.014	0.26494	0.18274	1315	24	38	1392	29	92	1505	290	1505	290	226.9	376	484000	279	5.6	0.053	21.63	1.99	0.44	94.1	72.1	13090	NA	337	35.2	28.8	n
1145	s171009_51	Mcdills27	5.28	0.17	0.62	0.3215	0.0062	0.01	0.1213	0.0038	0.018	0.22663	0.27721	1796	30	49	1858	28	100	1962	270	1962	270	224.5	328	496000	239	8.2	0.026	26.6	2.53	1.01	85.9	53	10350	NA	435	58.3	39.3	y
1146	s171009_52	Mcdills27	1.544	0.096	0.2	0.155	0.0041	0.0056	0.0734	0.0048	0.011	0.26153	0.17745	928	23	31	940	40	83	920	310	928	31	177	376	504000	295	6.1	-0.000669	7.4	0.77	0.36	102.9	67.1	12940	NA	229.9	18.4	10.5	y
1147	s171009_53	Mcdills27	1.14	0.088	0.16	0.0954	0.0032	0.0039	0.0895	0.0067	0.014	0.39223	0.08416	590	19	24	764	42	75	1310	300	590	24	654	595	481000	336	53.6	1.11	98.4	21.4	13.6	187	31.9	11410	NA	217	21.6	32.3	n
1148	s171009_54	Mcdills27	12.74	0.48	1.5	0.472	0.013	0.017	0.1949	0.005	0.028	0.70799	0.041454	2489	56	75	2647	38	120	2778	240	2778	240	219	389	499000	333	5.6	-0.000692	17.7	1.72	1.44	115.8	65.8	11890	NA	729	158.1	44.5	n
1149	s171009_55	Mcdills27	1.81	0.14	0.25	0.1653	0.0089	0.0097	0.0798	0.0044	0.012	0.70544	0.14173	983	49	54	1026	50	90	1130	300	983	54	453	613	504000	709	9.3	0.03	4.88	2.35	1.59	190	118.1	13610	NA	346	30.6	20	y
1150	s171009_57	Mcdills27	7.2	4.4	4.5	0.117	0.017	0.017	0.164	0.047	0.052	0.56889	-0.16923	700	89	90	1170	280	280	1370	540	700	90	169.7	102.6	503000	167	13.9	1.1	45.8	2.25	0.7	31.5	17.9	11000	NA	52.4	22	17.9	n
1151	s171009_58	Mcdills27	1.81	0.15	0.25	0.1784	0.0054	0.0069	0.0772	0.007	0.013	-0.031555	0.39223	1057	29	38	1041	59	100	990	370	1057	38	116.6	234.6	502000	561	13.3	1.62	7.5	7.5	0.36	178	79.2	11320	NA	162.5	13.8	10.84	y
1152	s171009_59	Mcdills27	2.732	0.084	0.32	0.2218	0.0041	0.0068	0.0899	0.0028	0.013	0.24527	0.23276	1291	22	36	1332	23	88	1400	280	1291	36	77	847	507000	953	6.9	-0.000635	4.91	0.51	1.7	78	100.6	14920	NA	736	73.4	3.25	y
1153	s171009_6	Mcdills27	0.914	0.051	0.12	0.1112	0.0027	0.0038	0.0595	0.0034	0.009	0.21442	0.22257	679	16	22	656	28	64	530	340	679	22	184	551	476000	395	10.9	0.079	7.69	5.8	2.91	185	70.4	10980	NA	224	16.2	9.4	y
1154	s171009_60	Mcdills27	4.07	0.18	0.5	0.285	0.01	0.012	0.1045	0.0034	0.015	0.69208	-0.10128	1611	50	61	1641	39	110	1701	270	1701	270	188	368	482000	459	9.1	-0.000483	2.24	2.63	0.46	118.2	49.5	13100	NA	413	48.1	15.86	y
1155	s171009_61	Mcdills27	1.88	0.14	0.25	0.1807	0.0048	0.0065	0.0766	0.005	0.012	0.40797	-0.008263	1070	26	36	1061	49	90	1040	330	1070	36	85.3	238.9	479000	323	2.5	-0.000448	13.7	1.22	0.161	147.7	125.6	11800	NA	167.4	14.2	8.07	y
1156	s171009_62	Mcdills27	0.667	0.038	0.085	0.0827	0.0016	0.0026	0.0586	0.0032	0.0088	0.26234	0.08588	511.8	9.5	15	514	23	52	480	330	511.8	15	591	617	508000	147	3.4	-0.00055	37.9	0.59	1.84	61.8	68	12320	NA	202.4	13.13	20.22	y
1157	s171009_63	Mcdills27	1.93	0.11	0.25	0.0855	0.0029	0.0036	0.1689	0.0095	0.026	0.33651	0.37472	529	17	21	1084	40	89	2546	220	2546	220	1198	593	498000	696	20.7	2.4	123	27.6	16.4	372	94.3	10690	NA	192.2	35.7	52.4	n
1158	s171009_64	Mcdills27	6.73	0.24	0.8	0.2544	0.0062	0.0088	0.1868	0.0053	0.027	0.57983	0.1918	1460	32	45	2072	32	110	2706	240	2706	240	574	1669	479000	950	30.3	0.21	110	21	22.9	400	154.2	17610	NA	1734	361	65.1	n
1159	s171009_65	Mcdills27	2.04	0.18	0.29	0.1158	0.0034	0.0044	0.127	0.013	0.022	-0.085511	0.41826	706	19	25	1112	62	100	1960	320	1960	320	2350	612	472000	1120	31.4	0.15	202	22.5	24.3	786	159	12040	NA	297	42.4	52.5	n
1160	s171009_66	Mcdills27	2.486	0.097	0.3	0.1916	0.003	0.0055	0.0944	0.0037	0.014	0.075349	0.37145	1129	16	30	1265	29	88	1492	280	1129	30	340	395.4	5.00E+05	670	5.9	15.7	63.6	50.5	2.28	278.2	110.8	9650	NA	299.3	31.1	30.3	n
1161	s171009_67	Mcdills27	2.08	0.11	0.26	0.1942	0.0056	0.0073	0.0792	0.0045	0.012	0.2143	0.37578	1143	30	40	1132	37	85	1150	280	1143	40	142	359	514000	311	11.7	-0.000468	6.96	1.05	0.6	107.4	89.2	12070	NA	262	23.4	9.7	y
1162	s171009_68	Mcdills27	1.864	0.078	0.23	0.1631	0.0026	0.0048	0.0835	0.0035	0.012	0.31054	0.16973	974	14	26	1062	27	78	1239	270	974	26	195.1	621	528000	1080	9	0.0031	7.7	2.85	1.34	293	137.8	14330	NA	405	37.4	13.31	y
1163	s171009_69	Mcdills27	4.52	0.15	0.54	0.3005	0.0046	0.0087	0.1088	0.0037	0.016	0.17366	0.29473	1693	23	43	1727	28	100	1763	270	1763	270	199.9	323	504000	279	3.7	0.0043	20.7	2.33	1.01	98.1	78.1	11620	NA	387	46.7	31	y
1164	s171009_7	Mcdills27	0.99	0.15	0.19	0.1003	0.0044	0.0051	0.071	0.011	0.015	0.17287	0.19982	616	26	30	669	75	95	690	430	616	30	593	188.1	455000	231	19.6	0.33	47.1	4.9	3.69	89.9	28.5	11420	NA	72.2	5.98	15.9	y
1165	s171009_70	Mcdills27	3.57	0.11	0.42	0.2646	0.0038	0.0075	0.0982	0.0036	0.014	-0.10297	0.47571	1513	19	38	1536	26	95	1571	270	1571	270	289.7	412	523000	455	6.3	0.008	32.3	1.51	1.09	126.8	95.1	12860	NA	433	47	40.4	y
1166	s171009_71	Mcdills27	0.857	0.052	0.11	0.1	0.0018	0.003	0.0624	0.0039	0.0096	0.07099	0.1828	614	10	18	620	29	62	590	340	614	18	143.9	490	509000	868	12.5	1	6.74	7.3	7.8	251	61.7	12900	NA	193.1	13.3	4.94	y
1167	s171009_72	Mcdills27	1.063	0.071	0.14	0.114	0.0024	0.0037	0.0684	0.0046	0.011	0.034466	0.21539	696	14	21	724	35	70	770	340	696	21	545	328.8	511000	561	20	0.3	53.9	4.54	1.91	212.1	95.3	10290	NA	148.1	11.2	34	y
1168	s171009_73	Mcdills27	11.76	0.49	1.4	0.4651	0.0092	0.015	0.1823	0.0069	0.027	0.49273	0.0024518	2460	40	64	2583	41	120	2653	250	2653	250	103.1	178.2	510000	324	9.3	0.57	17	2.7	0.26	68.1	53.2	12000	NA	337.6	68.2	23.26	y
1169	s171009_74	Mcdills27	2.38	0.15	0.31	0.1279	0.0021	0.0038	0.1355	0.0078	0.021	0.21476	0.029107	776	12	22	1220	42	88	2105	260	2105	260	2330	1578	538000	1255	49.9	0.35	270	35	45.4	818	199.4	14120	NA	802	122	93.4	n
1170	s171009_75	Mcdills27	0.975	0.089	0.14	0.1012	0.0026	0.0036	0.0698	0.006	0.012	0.3247	-0.078555	621	15	21	671	45	73	750	350	621	21	188	262	505000	114	10.7	0.024	25.1	3.57	1.84	43.4	16.2	9900	NA	105.4	8.15	10.9	y
1171	s171009_76	Mcdills27	3.123	0.093	0.37	0.2441	0.0041	0.0073	0.0931	0.0026	0.013	0.37626	0.29417	1407	21	38	1433	23	91	1471	280	1407	38	859	512	509000	688	8.3	0.9	126.4	10	2.89	241.3	142.8	10510	NA	499	51.3	99	y
1172	s171009_77	Mcdills27	0.68	0.066	0.1	0.0813	0.0021	0.0029	0.0605	0.0061	0.01	-0.007305	0.27567	503	13	17	511	40	62	460	360	503	17	222	244.9	526000	391	9.3	0.7	6.5	2.75	0.74	108.5	59.7	11730	NA	79.8	5.35	6.54	y
1173	s171009_78	Mcdills27	2.83	0.16	0.36	0.224	0.007	0.0089	0.0914	0.0045	0.014	0.55726	-0.050582	1301	37	47	1354	43	97	1453	280	1301	47	117	248	512000	140	3.6	0.014	6.9	0.22	0.46	33.3	41.2	11790	NA	221	22.6	5.35	n
1174	s171009_79	Mcdills27	12.34	0.27	1.4	0.4884	0.0066	0.014	0.1848	0.0037	0.026	0.44215	0.17057	2563	29	59	2627	21	110	2688	230	2688	230	228	326.1	539000	261	5.3	0.015	22.8	1.95	2.68	118.8	53.3	12770	NA	632	129.1	34.4	y
1175	s171009_8	Mcdills27	3.85	0.17	0.47	0.2797	0.006	0.0091	0.1001	0.0047	0.015	0.27103	0.27219	1588	30	45	1591	36	99	1576	280	1576	280	234.4	213.5	477000	431	14.3	0.032	30.6	4.39	2.92	172.8	137.6	9690	NA	220	25.8	36.5	y
1176	s171009_80	Mcdills27	0.829	0.047	0.11	0.1019	0.0021	0.0033	0.0597	0.0034	0.0091	0.165	0.19094	625	13	19	607	26	58	530	330	625	19	307.8	501	514000	509	6.8	1.96	42.9	5.9	1.6	118	74.8	11330	NA	202	13.43	16.01	y
1177	s171009_81	Mcdills27	0.83	0.1	0.14	0.0925	0.0046	0.0052	0.066	0.0083	0.012	0.2985	0.010157	569	27	30	596	62	84	600	390	569	30	310	213	557000	197	3.8	-0.000846	30.8	1.51	2.5	89	26.8	12770	NA	75.3	5.5	4.75	y
1178	s171009_82	Mcdills27	7.28	0.35	0.9	0.2349	0.0038	0.0069	0.2242	0.0092	0.033	0.34198	0.017845	1359	20	36	2128	45	120	2980	240	2980	240	1270	2328	484000	1126	15.4	0.039	6.55	5.16	8.22	314	67.8	13060	NA	2155	535	388	n
1179	s171009_83	Mcdills27	1.58	0.085	0.2	0.1646	0.0029	0.005	0.0701	0.0039	0.011	-0.0060261	0.30372	982	16	27	952	34	79	870	310	982	27	96.7	346	532000	766	8.9	-0.000572	1.38	2.16	0.141	173.2	110.4	12940	NA	227	17.7	8.98	y
1180	s171009_84	Mcdills27	1.57	0.059	0.19	0.1478	0.0022	0.0042	0.0777	0.0032	0.011	0.077957	0.32593	889	12	24	953	23	74	1097	300	889	24	602	719	509000	860	15	8.3	54.8	10	3.76	207	128.9	10260	NA	426	36.3	38.6	y
1181	s171009_85	Mcdills27	1.33	0.097	0.18	0.1463	0.0036	0.005	0.066	0.0044	0.01	0.36281	0.032579	879	20	28	842	42	78	700	340	879	28	50.4	281	521000	569	5.4	4	12.3	10.2	0.239	148	25.2	13390	NA	162.2	11.84	4.16	y
1182	s171009_86	Mcdills27	0.707	0.098	0.13	0.0908	0.0036	0.0042	0.0577	0.008	0.011	0.10498	0.15975	560	21	25	521	58	75	280	380	560	25	116	190	532000	214	14.7	0.219	8.18	12.4	2.13	98	23.5	9640	NA	66.5	3.88	4.69	y
1183	s171009_87	Mcdills27	2.95	0.11	0.35	0.2217	0.0056	0.0078	0.0973	0.0033	0.014	0.51019	0.26477	1290	29	41	1386	28	91	1544	270	1544	270	514	579	517000	248	13.5	0.014	17.04	2.87	1.97	95.3	82.4	9460	NA	510	54.1	43.1	n
1184	s171009_88	Mcdills27	1.658	0.093	0.21	0.1393	0.0033	0.0048	0.0882	0.0062	0.014	-0.1751	0.54667	840	19	27	981	36	81	1270	320	840	27	288	471	533000	497	10.4	8	35.9	15.4	1.19	123.9	64.2	11610	NA	261.3	25.8	24.6	n
1185	s171009_89	Mcdills27	0.659	0.061	0.097	0.0883	0.0022	0.0031	0.0536	0.0048	0.009	-0.029154	0.24661	545	13	18	501	36	58	290	350	545	18	233	246	525000	203	13.3	0.49	19.6	9.9	2.11	93.7	34.7	10060	NA	86.4	5.35	11.31	y
1186	s171009_9	Mcdills27	1.98	0.11	0.25	0.1871	0.0032	0.0056	0.0764	0.0041	0.012	0.12976	0.1909	1105	17	30	1094	37	87	1050	300	1105	30	369	377.6	521000	251	13.3	0.047	24.5	1.84	2.86	94.8	58.8	14050	NA	265.6	23.5	13.13	y
1187	s171009_91	Mcdills27	11.65	0.74	1.5	0.475	0.013	0.018	0.179	0.011	0.028	0.15598	0.34963	2510	61	81	2542	62	130	2580	280	2580	280	37.9	55.4	525000	1200	12.4	7.7	30	25	2.45	132.4	56.5	9060	NA	104.6	20.3	9.2	y
1188	s171009_92	Mcdills27	0.735	0.085	0.12	0.0897	0.0022	0.0031	0.0601	0.0072	0.011	0.0059421	0.2859	554	13	19	536	49	69	370	360	554	19	193.2	192.7	541000	154	9	0.18	14.67	9.5	2.1	89.2	24.1	11420	NA	68.5	4.5	8.49	y
1189	s171009_93	Mcdills27	0.62	0.035	0.079	0.08	0.0013	0.0023	0.0565	0.0031	0.0085	0.1669	0.13315	496.2	7.6	14	486	22	49	410	330	496.2	14	663	1088	558000	204	8	-0.000622	24.3	5.04	0.78	130.7	62.5	11570	NA	344.4	21.4	28.6	y
1190	s171009_94	Mcdills27	1.363	0.098	0.18	0.0828	0.0019	0.0028	0.1188	0.0078	0.018	0.25037	0.12468	512	11	16	857	41	77	1860	300	1860	300	1179	674	516000	415	457	20.4	126	29.1	14	274	54.6	12400	NA	219	29	44.3	n
1191	s171009_95	Mcdills27	3.55	0.15	0.43	0.2463	0.0091	0.011	0.1058	0.0031	0.015	0.72322	0.44415	1416	47	56	1529	32	93	1706	280	1706	280	642	961	517000	835	16.7	0.091	27.1	6.4	5.17	268	74.2	13230	NA	897	105.3	33.8	n
1192	s171009_96	Mcdills27	3.54	0.12	0.42	0.1434	0.0027	0.0045	0.1801	0.0062	0.026	0.27091	0.3732	863	15	25	1528	26	93	2640	240	2640	240	577	795	501000	358	15.9	0.05	22.5	3.67	4.39	225	125.3	11060	NA	451	89.7	90	n
1193	s171009_97	Mcdills27	1.24	0.11	0.18	0.1257	0.0032	0.0045	0.0721	0.0062	0.012	0.13829	0.16079	763	18	26	811	48	80	870	340	763	26	393	204.1	540000	364	12.4	0.255	22.6	6.2	2.14	211	93.1	10390	NA	101.3	7.93	21.6	y
1194	s171009_98	Mcdills27	1.1	0.24	0.27	0.092	0.0053	0.0058	0.084	0.015	0.019	0.92312	-0.4703	567	32	34	706	90	100	990	390	567	34	272	163.3	581000	136	31.9	-0.000797	41.3	1.35	1.75	44.2	23.1	13300	NA	60.5	5.6	11.2	n
1195	s171009_99	Mcdills27	19.54	0.5	2.3	0.579	0.012	0.019	0.244	0.0054	0.035	0.48335	0.32179	2941	49	76	3066	25	110	3149	240	3149	240	285.4	486	531000	140	60	0.011	26.2	1.21	2.15	96.7	71.6	11840	NA	1111	300.8	66.3	y
1196	tat2_3_0	OFWM	1.963	0.08	0.1	0.1844	0.0037	0.0037	0.0781	0.0031	0.0045	0.35343	0.14297	1090	20	20	1096	28	36	1114	120	1090	20	137.9	187.7	451000	480	26.3	0.0063	4.95	7.14	0.46	179.2	60	11100	1622	133.1	11.46	13.69	y
1197	tat2_3_12	OFWM	3.61	0.18	0.22	0.2716	0.0071	0.0071	0.0973	0.0042	0.0058	0.52946	0.024492	1547	36	36	1538	40	48	1533	120	1533	120	75.7	125.3	458000	144	15.4	0.0073	9.63	0.72	0.225	50.1	36.08	10910	612	127.8	13.88	10.45	y
1198	tat2_3_13	OFWM	2.46	0.12	0.15	0.2205	0.0055	0.0055	0.0815	0.0031	0.0046	0.62289	-0.11562	1283	29	29	1250	35	42	1200	110	1283	29	168.3	212.8	458000	220	5.4	0.016	15.58	2.5	1.02	81.6	50.5	10080	898	175.6	16	18.79	y
1199	tat2_3_15	OFWM	3.22	0.16	0.19	0.2556	0.0081	0.0081	0.0917	0.0035	0.0052	0.64734	0.011661	1466	42	42	1453	38	45	1441	110	1466	42	219	326	461000	249	8	0.104	12.33	4.89	1.11	164.7	79.8	8600	1692	302.9	31.2	27	y
1200	tat2_3_17	OFWM	4.66	0.17	0.23	0.315	0.0067	0.0067	0.1094	0.0033	0.0057	0.52706	0.036464	1764	33	33	1763	31	41	1772	94	1772	94	83.3	101	452000	205	12.4	0.02	7.23	2.73	1.67	77.1	39.1	10120	794	118.8	14.43	12.56	y
1201	tat2_3_18	OFWM	0.917	0.048	0.056	0.1077	0.0022	0.0022	0.0617	0.0029	0.0039	0.39676	-0.039253	659	13	13	655	25	30	610	140	659	13	190.5	412.2	459000	130	5.9	0.097	18.44	5.55	1.24	118.9	63.1	12850	1272	166.5	11.41	9.91	y
1202	tat2_3_20	OFWM	4.25	0.17	0.22	0.2791	0.0089	0.0089	0.11	0.0025	0.0052	0.80295	0.040038	1584	45	45	1675	33	42	1804	86	1804	86	249	319	459000	971	20.4	0.47	11.3	13.6	2.88	177.2	58.9	12550	1722	326.7	39.8	11.28	n
1203	tat2_3_22	OFWM	1.7	0.064	0.085	0.1618	0.0032	0.0032	0.0757	0.0024	0.004	0.60895	-0.060218	966	17	17	1003	25	33	1086	98	966	17	281	505	453000	1053	16.3	1.52	43.6	17.1	2.16	178.6	103.5	13580	2006	304.2	25.25	7.28	y
1204	tat2_3_23	OFWM	5.16	0.19	0.25	0.3283	0.0076	0.0076	0.1135	0.0029	0.0056	0.70807	-0.12213	1828	37	37	1838	31	41	1843	89	1843	89	42.2	394.6	457000	615	5.9	-0.00359	0.515	0.72	0.017	126.9	63.4	13230	1394	482	59.6	6.75	y
1205	tat2_3_24	OFWM	2.004	0.092	0.11	0.179	0.0045	0.0045	0.0806	0.0037	0.005	0.26226	0.28436	1061	25	25	1109	31	38	1181	120	1061	25	252	242	460000	322	20.7	0.4	52.8	11.5	2.87	55.9	28.24	11280	539	158.3	14.1	15.99	n
1206	tat2_3_25	OFWM	3.74	0.15	0.2	0.2739	0.006	0.006	0.0985	0.0034	0.0053	0.53706	-0.043828	1559	30	30	1576	35	45	1582	110	1582	110	149.3	154.7	443000	232	3.9	0.0085	28.5	2.39	1.45	84.5	73.4	10750	1024	156.8	16.79	19.51	y
1207	tat2_3_26	OFWM	4.5	0.14	0.2	0.3013	0.0064	0.0064	0.1078	0.0029	0.0054	0.53337	0.20241	1696	32	32	1725	26	38	1747	92	1747	92	92.6	228.8	463000	724	12.1	-0.0015	3.37	1.29	0.123	128.1	77.6	12090	1460	256.3	30.12	14.08	y
1208	tat2_3_27	OFWM	1.94	0.19	0.2	0.1809	0.0054	0.0054	0.0776	0.0076	0.0082	0.22977	0.085939	1071	29	29	1057	68	71	930	230	1071	29	60.2	42.78	457000	149	13.4	0.01	14.1	0.97	0.195	49.6	34.5	10340	588	28.75	2.42	5.45	n
1209	tat2_3_29	OFWM	2.03	0.11	0.13	0.1867	0.0044	0.0044	0.0786	0.0042	0.0053	0.16831	0.261	1103	24	24	1114	37	43	1090	150	1103	24	174	126.6	455000	111	11.9	0.0063	48.8	1.33	0.59	61.5	55.9	11370	754	88	7.47	16.77	y
1210	tat2_3_3	OFWM	4.26	0.15	0.21	0.2999	0.0054	0.0054	0.1041	0.0032	0.0054	0.48663	0.027649	1690	27	27	1678	29	40	1690	92	1690	92	100.8	172.9	432000	202	10.4	0.015	10.22	1.6	0.329	76.9	46.9	10510	878	197.9	22.97	16.09	y
1211	tat2_3_30	OFWM	2.17	0.17	0.19	0.1917	0.0052	0.0052	0.0813	0.0063	0.0072	0.26991	0.093813	1129	28	28	1142	59	63	1090	190	1129	28	36	59.3	472000	193	16.4	0.0024	6.23	1.76	0.477	80.6	39.53	10070	844	42.4	3.72	3.56	y
1212	tat2_3_35	OFWM	4.78	0.25	0.29	0.3094	0.008	0.008	0.1113	0.0052	0.007	0.4165	0.13509	1736	39	39	1774	41	49	1795	110	1795	110	133.2	93.9	466000	462	37.8	0.36	6.93	5.58	1.32	172.6	83.1	9450	1840	108.5	12.81	20.5	y
1213	tat2_3_36	OFWM	3.56	0.16	0.2	0.2435	0.0082	0.0082	0.1063	0.0038	0.0059	0.66171	0.20282	1403	43	43	1535	37	46	1710	100	1710	100	462	234.8	461000	429	12.4	0.78	36.7	19.5	5.41	105.8	51.6	10080	953	219.1	25.1	27.3	n
1214	tat2_3_37	OFWM	3.89	0.16	0.21	0.2828	0.0069	0.0069	0.0991	0.0035	0.0054	0.4921	0.067338	1604	35	35	1602	33	42	1581	100	1581	100	87.3	146.7	450000	130	8.8	-0.00384	11.41	0.7	0.344	38.6	31.1	10350	492	154.7	16.62	11.81	y
1215	tat2_3_4	OFWM	4.54	0.21	0.26	0.3161	0.0069	0.0069	0.1056	0.0047	0.0065	0.28259	0.19916	1769	34	34	1726	39	48	1699	110	1699	110	102.4	85.9	455000	605	21.7	0.014	4.61	2.84	0.47	138.4	67.5	10850	1448	103.9	12.22	16.82	y
1216	tat2_3_40	OFWM	4.44	0.18	0.23	0.2971	0.0074	0.0074	0.108	0.0032	0.0055	0.68587	-0.03206	1675	37	37	1711	33	43	1747	97	1747	97	129.4	278	457000	347	9	0.078	5.67	2.9	1.17	105	70.5	13820	1216	310.7	36.5	15.41	y
1217	tat2_3_41	OFWM	1.171	0.05	0.063	0.1298	0.003	0.003	0.0656	0.0029	0.004	0.20647	0.3033	786	17	17	787	25	31	761	130	786	17	115.3	232.3	457000	36	0.9	0.013	32.1	0.52	0.59	22.2	29	8570	412	113.1	8.11	8.05	y
1218	tat2_3_43	OFWM	4.71	0.22	0.27	0.3091	0.0082	0.0082	0.1099	0.004	0.0061	0.64654	-0.16641	1734	40	40	1762	38	47	1786	95	1786	95	56.3	168.3	433000	647	18.5	-0.00421	2.02	1.6	0.214	130.1	78.5	11160	1483	195.8	23.6	8.75	y
1219	tat2_3_44	OFWM	2.75	0.17	0.19	0.2243	0.0062	0.0062	0.0891	0.005	0.0062	0.38943	0.062401	1303	32	32	1325	45	51	1340	140	1303	32	92.7	79.6	474000	468	25.1	0.011	2.86	3.84	0.45	118.1	69.2	11380	1292	68.1	6.61	11.2	y
1220	tat2_3_45	OFWM	1.224	0.071	0.081	0.1341	0.0031	0.0031	0.0666	0.004	0.0049	0.15055	0.26838	811	18	18	803	32	37	740	160	811	18	123.6	178.8	459000	179	7.4	0.038	2.14	2.72	0.93	196.4	106.6	9860	2122	91	6.54	8.52	y
1221	tat2_3_46	OFWM	1.199	0.081	0.09	0.1331	0.0035	0.0035	0.0655	0.0041	0.0049	0.30507	0.056554	805	20	20	789	36	40	730	170	805	20	118.5	165.2	464000	192	8.2	-0.00392	2.06	2.97	1.27	225.9	115.1	9680	2400	83.5	5.98	8.77	y
1222	tat2_3_49	OFWM	1.652	0.098	0.11	0.1626	0.004	0.004	0.0737	0.0048	0.0057	-0.038313	0.40805	971	22	22	978	37	43	960	160	971	22	80.6	90	470000	174	15	0.018	10.69	1.53	0.522	89.3	52.7	10260	980	55.7	4.53	7.09	y
1223	tat2_3_5	OFWM	4.43	0.18	0.23	0.3036	0.0064	0.0064	0.1072	0.0043	0.0062	0.29477	0.25341	1708	32	32	1707	34	45	1719	110	1719	110	140.6	100.4	462000	639	22.8	0.0068	6.05	5.36	1.03	184.8	79.2	11020	1859	116.2	13.9	22.62	y
1224	tat2_3_50	OFWM	2.68	0.15	0.17	0.235	0.0068	0.0068	0.0834	0.0045	0.0057	0.35277	0.12396	1359	35	35	1308	43	50	1230	130	1359	35	54.8	108.2	456000	285	3.14	0.049	18.8	5.4	2.06	221.5	109.3	8190	2247	97.3	8.99	5.67	n
1225	tat2_3_51	OFWM	2.57	0.14	0.17	0.2267	0.0057	0.0057	0.0826	0.004	0.0053	0.3926	0.044986	1316	30	30	1279	39	45	1207	130	1316	30	116.5	144.4	466000	199	15.6	0.011	10.03	1.78	0.62	95.6	59.6	10610	1091	124.5	11.5	13.69	y
1226	tat2_3_52	OFWM	1.98	0.15	0.16	0.1962	0.0069	0.0069	0.0727	0.0049	0.0057	0.24511	0.17981	1153	37	37	1096	52	57	950	180	1153	37	59.4	50.5	464000	303	25.3	0.0057	26.9	1.39	0.84	70.7	47.4	10920	821	37.72	3.1	5.92	n
1227	tat2_3_53	OFWM	5.13	0.23	0.28	0.3374	0.0075	0.0075	0.1104	0.0037	0.0059	0.65314	-0.17471	1873	36	36	1828	38	47	1782	99	1782	99	85.2	151.9	463000	304	14.7	-0.00391	3.66	1.11	0.061	54	34.7	11550	643	194.8	24	14.37	y
1228	tat2_3_54	OFWM	2.58	0.12	0.15	0.2172	0.0057	0.0057	0.0874	0.0037	0.0052	0.52203	0.037684	1266	30	30	1284	35	42	1352	110	1266	30	224	270.5	464000	406	10	0.628	11.94	12.1	3.48	107.4	23.9	13560	853	224.6	21.8	5.5	y
1229	tat2_3_55	OFWM	3.02	0.16	0.19	0.2395	0.0072	0.0072	0.0923	0.0045	0.0059	0.39571	0.15101	1382	37	37	1398	40	47	1421	130	1382	37	156.5	207.6	467000	440	11.2	0.495	10.03	10.5	3.54	71.6	19.32	13080	580	190.1	19.7	8.01	y
1230	tat2_3_57	OFWM	4.42	0.19	0.24	0.3043	0.0075	0.0075	0.1058	0.0036	0.0057	0.61603	-0.06806	1711	37	37	1705	36	45	1703	100	1703	100	66.1	191.6	464000	479	11	0.0047	2.57	1.8	0.184	120	41.4	12980	1210	224.2	26.8	10.35	y
1231	tat2_3_58	OFWM	4.42	0.22	0.26	0.303	0.0083	0.0083	0.1063	0.004	0.006	0.63223	-0.11236	1704	41	41	1702	41	49	1721	100	1721	100	158.8	146.5	459000	200	21.4	0.049	24.3	7.36	1.74	105.1	53.6	8890	1113	170.4	20.47	23.9	y
1232	tat2_3_59	OFWM	2.95	0.15	0.18	0.2397	0.0066	0.0066	0.09	0.0042	0.0056	0.45041	0.065869	1384	34	34	1383	39	47	1380	120	1384	34	198	148	469000	212	10.7	-0.0041	20.72	3.41	1.52	135.3	71.1	11470	1474	135.9	13.67	24.69	y
1233	tat2_3_6	OFWM	3.59	0.19	0.22	0.2699	0.0083	0.0083	0.0998	0.0055	0.0069	0.33436	0.23675	1538	42	42	1533	43	51	1550	140	1550	140	103.8	60.5	456000	331	13.5	0.0091	34.2	2.49	0.95	83.2	56.2	11200	958	61.9	6.79	14.88	y
1234	tat2_3_60	OFWM	3.43	0.15	0.18	0.2469	0.0066	0.0066	0.1011	0.0032	0.0053	0.69232	-0.060229	1421	34	34	1501	34	42	1625	98	1625	98	495	279.8	441000	633	20	1.07	28.7	24.5	6.25	142.8	56.4	10900	1292	262.6	30.3	25.3	n
1235	tat2_3_62	OFWM	2.55	0.1	0.13	0.2197	0.006	0.006	0.0851	0.0031	0.0047	0.48911	0.21753	1279	32	32	1280	30	38	1287	110	1279	32	155.3	245.4	466000	136	4.06	0.052	17.34	1.24	0.33	47.9	47.8	13420	641	205.4	20.01	15.69	y
1236	tat2_3_63	OFWM	4.56	0.2	0.25	0.301	0.0091	0.0091	0.1106	0.0038	0.006	0.66446	0.044058	1693	45	45	1730	37	46	1786	98	1786	98	308	229.5	454000	319	5.9	0.392	69.4	24.9	5.1	106.2	59.3	11750	1100	261.2	33	30.6	y
1237	tat2_3_64	OFWM	2.04	0.13	0.14	0.198	0.0059	0.0059	0.0754	0.0045	0.0055	0.30678	0.14278	1163	31	31	1113	42	48	1000	150	1163	31	75.1	92.1	460000	156	14.9	0.0033	8.47	2.47	0.509	102.9	54.8	10400	1122	69.8	6	7.45	n
1238	tat2_3_67	OFWM	3.11	0.16	0.19	0.2474	0.0067	0.0067	0.0908	0.0038	0.0054	0.52592	0.003653	1424	35	35	1422	40	47	1418	120	1424	35	104.3	143	461000	301	9.1	0.258	23.4	9.1	2.09	142.2	75.2	12340	1470	133.9	14.09	10.31	y
1239	tat2_3_70	OFWM	3.95	0.16	0.2	0.2728	0.0074	0.0074	0.1055	0.003	0.0053	0.70944	-0.075683	1553	37	37	1614	32	42	1706	92	1706	92	526	419	440000	700	13.3	1.25	33	28.5	4.76	134.3	65.3	12860	1305	431.5	52.2	21.8	y
1240	tat2_3_8	OFWM	4.7	0.29	0.33	0.321	0.01	0.01	0.1066	0.0053	0.0069	0.59478	0.0022254	1792	50	50	1750	52	59	1701	130	1701	130	40.9	75.4	422000	117	114	1.29	11.3	1.88	0.216	41.5	33.4	10100	516	92.9	11.16	6.92	y
1241	TAT21_0	MtCap	2.57	0.18	0.18	0.2249	0.0053	0.0076	0.0844	0.0062	0.0062	0.14106	0.20141	1307	28	40	1278	54	54	1180	160	1307	40	34.49	52.1	456000	416	13.9	0.49	45.5	3.54	0.99	121.4	90.3	8700	1408	45.2	4.26	4.14	n
1242	TAT21_1	MtCap	4.46	0.14	0.14	0.3087	0.0039	0.0084	0.1049	0.0033	0.0033	0.23103	0.16457	1734	19	42	1723	29	29	1702	59	1702	59	96.1	139	456000	173	10.3	0.0025	16.02	0.96	0.61	36.3	39.3	10230	513	165.9	19.51	15.57	y
1243	TAT21_10	MtCap	3.28	0.12	0.12	0.2533	0.0045	0.0076	0.0942	0.0028	0.0028	0.60793	0.027082	1455	23	39	1468	29	29	1493	58	1455	39	274	301.7	455700	700	8.6	4.9	67.5	20	3.57	97.3	80.1	11590	1098	301.4	31.5	35.22	y
1244	TAT21_12	MtCap	1.99	0.15	0.15	0.1834	0.0035	0.0057	0.0787	0.0063	0.0063	-0.29839	0.45968	1085	19	31	1108	52	52	1090	170	1085	31	217.9	84.6	467000	192	17.8	0.05	76.9	8.79	2.91	127.3	46.7	8950	1130	62.8	5.51	22.47	y
1245	TAT21_13	MtCap	2.11	0.17	0.17	0.1827	0.005	0.0067	0.0845	0.0068	0.0068	0.20435	0.13729	1081	27	36	1124	56	56	1170	160	1081	36	43.9	50.1	467000	277	27.8	0.0065	7.7	4.24	0.73	119.9	60.1	9520	1217	36.2	3.33	4.42	y
1246	TAT21_14	MtCap	4.02	0.14	0.14	0.2862	0.0045	0.0083	0.102	0.0036	0.0036	0.18589	0.2635	1622	23	41	1638	27	27	1639	68	1639	68	109.1	111.2	458000	236	7.8	0.77	42.2	2.28	0.64	70.5	55.4	11500	857	127.7	14.37	17.03	y
1247	TAT21_15	MtCap	3.36	0.13	0.13	0.2664	0.0035	0.0073	0.0924	0.0033	0.0033	0.28462	0.099418	1522	18	37	1488	30	30	1460	68	1522	37	137.3	149.9	465000	295	9.8	0.022	34.9	1.18	0.55	92.3	68.6	11890	1086	158.7	16.17	20.12	y
1248	TAT21_16	MtCap	2.8	0.18	0.18	0.2261	0.0058	0.008	0.0932	0.0068	0.0068	-0.063011	0.39194	1313	30	42	1343	52	52	1370	160	1313	42	57.5	45.8	467000	151	9.2	0.417	22.2	5.34	1.36	50	36.1	10650	570	40.5	4.16	6.77	y
1249	TAT21_17	MtCap	1.85	0.14	0.14	0.1126	0.0069	0.0074	0.1189	0.0064	0.0064	0.71126	0.38699	687	40	43	1053	48	48	1910	100	1910	100	203	309	448000	255	14.2	1.4	62.2	38.9	4.49	151.6	67.4	9440	1456	140	18.24	20.99	n
1250	TAT21_18	MtCap	2.22	0.15	0.15	0.1987	0.0049	0.0069	0.0819	0.0054	0.0054	0.29719	0.047584	1167	26	37	1167	49	49	1170	130	1167	37	0.48	51.5	468000	35	1.58	-0.003467	0.12	0.001	0.008	3.89	9.87	12710	112.2	40.8	3.69	0.227	y
1251	TAT21_19	MtCap	3.79	0.14	0.14	0.2799	0.0034	0.0076	0.0993	0.0035	0.0035	0.22701	0.18247	1590	17	38	1584	29	29	1586	68	1586	68	156.8	157.3	453000	730	14.1	0.9	33.7	4.09	0.78	87.1	56.8	9960	997	176	19.15	23.76	y
1252	TAT21_2	MtCap	1.836	0.077	0.077	0.1596	0.0035	0.0052	0.0837	0.0033	0.0033	0.3453	0.32776	954	20	29	1052	27	27	1247	82	954	29	975	278	433900	398	33.3	7.9	176	124	13.4	188	89.7	10720	1798	169.7	15.88	26.9	y
1253	TAT21_20	MtCap	3.94	0.13	0.13	0.2856	0.0043	0.0081	0.1009	0.003	0.003	0.37094	0.1758	1619	22	41	1615	26	26	1623	56	1623	56	165.7	237	460000	227	9.4	0.0023	15.24	1.29	0.36	89.9	55.7	11390	1036	270.7	29.6	25.2	y
1254	TAT21_21	MtCap	1.95	0.22	0.22	0.1805	0.0049	0.0065	0.0776	0.0082	0.0082	0.21449	0.023588	1069	26	36	1049	78	78	920	240	1069	36	102.3	38.31	463000	187	33.3	0.011	62.1	5.24	2.07	59.9	27.11	8390	576	27.9	2.4	10.42	n
1255	TAT21_22	MtCap	2.789	0.097	0.097	0.2061	0.0048	0.0069	0.0991	0.0026	0.0026	0.66847	0.14805	1207	26	37	1347	27	27	1592	52	1592	52	412	295	455000	707	32.8	3.34	160	89	17.5	323	154.9	11480	3130	241.3	25.96	39.2	n
1256	TAT21_23	MtCap	1.94	0.15	0.15	0.1871	0.0041	0.0061	0.0762	0.006	0.006	-0.0052227	0.27099	1105	22	33	1071	54	54	960	180	1105	33	162	57.3	471000	134	26.5	0.044	60.6	10.2	2.83	89	33.4	8580	809	42.2	3.56	16.7	n
1257	TAT21_24	MtCap	2.088	0.084	0.084	0.1803	0.0031	0.0054	0.0847	0.0029	0.0029	0.49078	0.040962	1068	17	29	1138	27	27	1281	68	1068	29	244	224.8	454000	629	19	3.31	58.1	49.2	7.7	172.6	70.3	10390	1651	163.1	15.1	13.99	n
1258	TAT21_26	MtCap	3.14	0.11	0.11	0.2265	0.0046	0.0072	0.1015	0.0027	0.0027	0.6039	0.10132	1315	24	38	1437	26	26	1637	49	1637	49	604	438	441000	617	38.9	13.6	269	231	23.3	347	145.4	11600	3410	397.4	44	47.3	n
1259	TAT21_27	MtCap	3.81	0.16	0.16	0.2677	0.0044	0.0078	0.1046	0.0045	0.0045	-0.026112	0.39524	1528	22	40	1592	35	35	1682	85	1682	85	70.7	88.3	469000	278	16.1	0.0052	10.97	1.43	0.57	80.1	54.4	10510	940	94.8	10.95	11.39	y
1260	TAT21_28	MtCap	3.49	0.14	0.14	0.2611	0.0051	0.0081	0.0973	0.0033	0.0033	0.49171	0.1086	1495	26	42	1515	32	32	1548	63	1548	63	218	204.4	455000	366	9	0.41	65.4	8.3	1.8	110.8	79.1	10840	1285	214.4	22.71	28.29	y
1261	TAT21_29	MtCap	4.52	0.22	0.22	0.2832	0.0096	0.012	0.1139	0.0045	0.0045	0.57076	0.18136	1617	44	53	1727	40	40	1862	75	1862	75	169	110.5	450000	240	10.3	1.44	30.1	30.3	3.33	107.1	49.5	9200	1087	129.3	16.26	14.11	n
1262	TAT21_3	MtCap	9.02	0.32	0.32	0.4379	0.0072	0.013	0.1498	0.0051	0.0051	0.28982	0.22799	2340	32	57	2331	32	32	2322	58	2322	58	33.25	65.4	468000	148	5.9	0.028	9.87	1.01	0.329	56.6	32.49	10130	631	111.6	18.69	7.46	y
1263	TAT21_30	MtCap	2.025	0.095	0.095	0.1895	0.0038	0.006	0.0776	0.0034	0.0034	0.20337	0.23775	1118	21	32	1115	32	32	1122	90	1118	32	161.7	110.9	469000	191	27.5	0.005	16.6	1.82	0.338	58.2	28.08	11040	608	85.2	7.23	16.69	y
1264	TAT21_31	MtCap	3.69	0.24	0.24	0.2785	0.0056	0.0088	0.0974	0.0066	0.0066	-0.052136	0.309	1583	28	44	1558	48	48	1510	130	1510	130	59.3	70	474000	192	15.3	-0.003392	20.9	0.97	0.7	50.5	37.3	10440	625	76	8.3	9	y
1265	TAT21_32	MtCap	3.53	0.16	0.16	0.2661	0.0043	0.0077	0.0971	0.0043	0.0043	0.2123	0.12725	1521	22	40	1524	36	36	1525	89	1525	89	95	97.8	468000	306	14.8	0.011	46.6	1.74	0.74	84.6	62.5	10950	992	105.2	11.13	13.89	y
1266	TAT21_33	MtCap	2.81	0.23	0.23	0.199	0.015	0.015	0.1015	0.0035	0.0035	0.91624	-0.0061496	1163	79	83	1333	65	65	1634	64	1634	64	500	349	449000	545	36.8	4.1	122	94	14.4	314	113.2	10760	2770	262.3	29	33.48	n
1267	TAT21_34	MtCap	4.51	0.16	0.16	0.3033	0.0045	0.0086	0.1079	0.0036	0.0036	0.17325	0.23286	1707	22	43	1726	29	29	1751	65	1751	65	60.4	153.5	472000	567	14.4	-0.0012	2.55	1.19	0.135	97.1	59.9	12480	1161	188.6	22.15	9.81	y
1268	TAT21_35	MtCap	4.48	0.16	0.16	0.2958	0.0046	0.0085	0.1106	0.0039	0.0039	0.1852	0.24767	1670	23	42	1720	31	31	1784	65	1784	65	177.1	113.4	463000	147	21.8	-0.0015	38.7	4.04	2.12	72.9	32.37	9980	725	135.3	16.06	28.5	y
1269	TAT21_36	MtCap	2.028	0.075	0.075	0.1886	0.0024	0.0052	0.0783	0.0027	0.0027	0.24841	0.051711	1114	13	28	1120	25	25	1126	68	1114	28	314.8	263.5	462000	202	14.8	0.179	26.47	1.9	0.194	64.7	34.64	12150	702	201.1	17.07	32.99	y
1270	TAT21_37	MtCap	4.15	0.17	0.17	0.2826	0.0048	0.0083	0.1059	0.0039	0.0039	0.27721	0.11152	1608	25	44	1655	32	32	1713	70	1713	70	211.8	128	458000	151	18.6	0.16	49.7	7.03	1.88	67.5	27.27	10210	654	147.8	17.09	31.2	y
1271	TAT21_38	MtCap	1.653	0.089	0.089	0.1584	0.003	0.0048	0.0763	0.0041	0.0041	0.12183	0.25056	947	17	27	982	33	33	1040	110	947	27	297.3	150.4	463000	240	20.2	1.32	76.2	18.7	2.47	92	43	9960	926	96.1	7.9	21.08	y
1272	TAT21_39	MtCap	2.008	0.079	0.079	0.1862	0.0032	0.0055	0.0786	0.0032	0.0032	0.12103	0.28504	1100	17	30	1112	27	27	1139	77	1100	30	122.9	129.3	463100	242	10.5	0.061	21.02	1.11	0.32	80.8	63	11790	1008	97.5	8.29	12.72	y
1273	TAT21_40	MtCap	2	0.2	0.2	0.1824	0.0054	0.007	0.0799	0.0079	0.0079	0.16885	0.097798	1079	29	38	1072	73	73	980	230	1079	38	66.6	34.91	471000	147	24.2	0.007	48.3	1.68	0.76	27.5	16.21	9650	310	25.69	2.22	6.84	n
1274	TAT21_41	MtCap	3.74	0.16	0.16	0.2692	0.0047	0.008	0.1008	0.0042	0.0042	0.19388	0.2243	1536	24	41	1569	35	35	1618	76	1618	76	86.5	96.8	457000	483	17.2	1.07	22.25	3.25	0.429	71.2	55.7	10600	910	105.3	11.49	13.39	y
1275	TAT21_42	MtCap	4.33	0.15	0.15	0.2944	0.004	0.0082	0.1068	0.0038	0.0038	0.166	0.2091	1663	20	41	1692	30	30	1719	68	1719	68	70.9	128.5	471000	122	9.1	-0.003241	11.44	0.68	0.159	39.1	30.21	11140	509	153.2	17.56	11.67	y
1276	TAT21_43	MtCap	3.77	0.19	0.19	0.2761	0.0052	0.0085	0.0983	0.0049	0.0049	0.081069	0.26036	1571	26	43	1572	40	40	1554	98	1554	98	65.2	75.9	466000	279	14.4	0.024	17.21	1.82	0.483	76.2	57.6	10740	919	84.2	8.94	9.91	y
1277	TAT21_44	MtCap	2.122	0.098	0.098	0.186	0.0036	0.0057	0.083	0.0041	0.0041	0.0031212	0.37137	1099	19	31	1147	32	32	1210	100	1099	31	84.9	149.3	462000	169	14	0.144	7.49	4.83	1.05	115.2	71.7	10030	1350	112.5	9.89	8.15	y
1278	TAT21_45	MtCap	4.38	0.19	0.19	0.2938	0.0042	0.0082	0.1082	0.0052	0.0052	0.028856	0.28192	1660	21	41	1697	37	37	1723	91	1723	91	69.4	67.4	472000	103	13	0.025	13.64	1.12	0.258	40.3	28.89	11480	526	80	9.36	11.02	y
1279	TAT21_47	MtCap	4.21	0.11	0.11	0.288	0.0038	0.0079	0.1056	0.0026	0.0026	0.32383	0.1482	1631	19	40	1671	22	22	1711	46	1711	46	89.6	280.8	462000	176	5.4	0.124	9.7	4.35	0.51	50	32.05	11330	591	326.5	37.3	12.51	y
1280	TAT21_48	MtCap	1.95	0.11	0.11	0.1812	0.0041	0.006	0.079	0.0047	0.0047	0.18463	0.2001	1073	22	32	1101	38	38	1110	120	1073	32	108.6	81	457000	314	21.5	0.065	7.94	10.16	0.99	168.1	60.3	10250	1542	59.1	5.03	11.19	y
1281	TAT21_49	MtCap	4.29	0.14	0.14	0.2969	0.0049	0.0087	0.1041	0.0037	0.0037	-0.016219	0.46794	1675	24	43	1686	27	27	1684	67	1684	67	98.6	96	465000	157	10.5	-0.003139	15.04	0.79	0.109	59.1	36.69	11590	675	115.5	13.05	15.81	y
1282	TAT21_5	MtCap	4.45	0.14	0.14	0.2724	0.0077	0.01	0.1188	0.0023	0.0023	0.80639	0.34981	1551	39	52	1715	26	26	1936	33	1936	33	261	351	444700	978	34.1	5.39	119	110	19.4	345	116.6	11720	3100	362.5	48.4	11.6	n
1283	TAT21_50	MtCap	4.67	0.3	0.3	0.2953	0.0067	0.0098	0.1178	0.0082	0.0082	0.13991	0.21683	1667	33	49	1757	59	59	1860	120	1860	120	65.4	46.3	457000	138	13.5	0.19	13.67	4.55	1.17	61	25.66	10090	602	54.6	6.9	10.54	n
1284	TAT21_51	MtCap	2.155	0.082	0.082	0.1925	0.003	0.0056	0.0808	0.0031	0.0031	0.2126	0.23306	1134	16	30	1161	27	27	1197	74	1134	30	90.2	178.5	458000	193	13.3	0.0065	12.75	1.32	0.235	60.8	41	12130	721	137	12.04	9.79	y
1285	TAT21_52	MtCap	3.57	0.11	0.11	0.2649	0.0039	0.0075	0.0973	0.003	0.003	0.18444	0.27475	1515	20	38	1538	25	25	1552	59	1552	59	132.3	176.5	463000	310	7	0.021	29.81	1.63	0.437	75.5	63.4	12670	935	188	19.83	19.04	y
1286	TAT21_53	MtCap	2.142	0.058	0.058	0.1926	0.0026	0.0053	0.0802	0.0022	0.0022	0.25441	0.23954	1135	14	29	1159	19	19	1195	57	1135	29	80.3	375.7	463000	29	1.51	-0.003056	7.27	0.017	0.058	9.1	23.44	13470	176.8	290.3	25.19	9.1	y
1287	TAT21_54	MtCap	10.49	0.27	0.27	0.449	0.0052	0.012	0.1683	0.004	0.004	0.34048	0.14278	2390	23	54	2474	23	23	2531	40	2531	40	70.3	133.8	462000	37	2.36	0.0027	7.51	0.27	0.115	12.65	19.5	11600	225	241.7	44	17.22	y
1288	TAT21_55	MtCap	4.45	0.11	0.11	0.3012	0.004	0.0083	0.1062	0.0027	0.0027	0.22544	0.39046	1701	21	44	1718	21	21	1722	47	1722	47	160.3	231.5	466000	141	9.3	-0.0013	25.74	1.01	0.214	53.4	36.74	11640	648	280.5	32.18	26.24	y
1289	TAT21_56	MtCap	4.31	0.15	0.15	0.2936	0.005	0.0087	0.1062	0.0041	0.0041	0.26691	0.20479	1659	25	43	1692	31	31	1705	71	1705	71	104.2	90.1	469000	175	20.6	0.0028	33.6	1.59	0.79	37.9	22.55	10150	444	106.3	12.21	16.78	y
1290	TAT21_57	MtCap	3.9	0.14	0.14	0.2804	0.0035	0.0076	0.1002	0.0037	0.0037	0.1346	0.24514	1593	18	38	1606	30	30	1614	67	1614	67	84.5	117.7	470000	299	13.2	0.0066	15.17	1.9	1.16	96.7	68.1	9100	1117	132.8	14.37	12.98	y
1291	TAT21_58	MtCap	3.78	0.13	0.13	0.2665	0.0038	0.0075	0.1025	0.0035	0.0035	0.17964	0.25917	1523	19	38	1582	27	27	1645	64	1645	64	88.2	114.6	467000	297	20	0.0042	17.58	1.34	0.56	77.2	56.3	10740	915	121.9	13.52	13.03	y
1292	TAT21_59	MtCap	1.96	0.072	0.072	0.1773	0.0021	0.0048	0.0794	0.0029	0.0029	0.12338	0.18757	1052	12	26	1097	25	25	1151	73	1052	26	141.1	270.1	471000	169	8.2	0.282	14.13	8.09	0.96	39.9	27.07	11440	476	193.3	16.52	10.22	y
1293	TAT21_6	MtCap	2.055	0.083	0.083	0.1873	0.0026	0.0052	0.0798	0.003	0.003	0.23216	0.16067	1107	14	28	1128	27	27	1159	75	1107	28	240.6	215.3	451000	227	7.7	0.432	56.9	7.92	1.58	74.5	58.8	11540	882	157.2	13.94	19.86	y
1294	TAT21_60	MtCap	3.67	0.19	0.19	0.2646	0.0048	0.008	0.1001	0.005	0.005	0.16627	0.21213	1512	25	41	1551	41	41	1590	93	1590	93	56.8	72.2	468000	195	5.9	-0.003052	15.71	0.57	0.55	44	49.2	10580	613	76.4	8.27	7.91	y
1295	TAT21_61	MtCap	4.36	0.15	0.15	0.301	0.0046	0.0086	0.1035	0.0035	0.0035	0.031298	0.36119	1696	23	43	1702	29	29	1689	65	1689	65	84.8	133.6	463900	123	2.5	0.0081	2.69	1.52	0.96	39.2	43.33	6620	567	160.1	18.14	13.68	y
1296	TAT21_63	MtCap	1.959	0.091	0.091	0.1858	0.0028	0.0053	0.0761	0.0037	0.0037	0.04293	0.25145	1098	15	29	1093	32	32	1040	100	1098	29	178.1	109.7	464000	288	16	0.028	50.1	8.32	3.52	149	74.6	9670	1505	81	6.67	18.28	y
1297	TAT21_64	MtCap	2.77	0.32	0.32	0.2228	0.0066	0.0085	0.089	0.01	0.01	0.070605	0.16618	1295	35	45	1305	84	84	1200	240	1295	45	17.55	36.9	462000	201	9.6	-0.003154	3.69	0.29	0.31	39.1	35.7	10230	517	33.16	3.18	2.1	y
1298	TAT21_65	MtCap	3.79	0.13	0.13	0.275	0.0036	0.0076	0.0994	0.0034	0.0034	0.059049	0.28433	1566	18	38	1590	25	25	1600	61	1600	61	88	145.2	462000	253	9.5	0.0042	20.01	0.43	0.179	53.1	49.1	12400	722	158.6	17.03	13.03	y
1299	TAT21_67	MtCap	2.01	0.23	0.23	0.1891	0.0059	0.0075	0.0759	0.0089	0.0089	0.029041	0.26072	1115	32	40	1083	75	75	910	230	1115	40	113.4	32.92	470000	315	35.3	0.038	76.2	6.9	2.02	47.9	19.55	8210	436	24.75	2.05	11.56	n
1300	TAT21_68	MtCap	3.95	0.11	0.11	0.2768	0.0029	0.0073	0.1028	0.0026	0.0026	0.45329	-0.069031	1575	15	37	1623	23	23	1661	47	1661	47	187.2	192.1	460000	356	12.7	0.023	17.21	3.02	0.91	94.1	75.6	10080	1178	211.6	23.58	28.21	y
1301	TAT21_69	MtCap	3.84	0.21	0.21	0.274	0.0055	0.0086	0.101	0.0054	0.0054	0.24794	0.13623	1560	28	44	1584	45	45	1580	110	1580	110	120.7	59.1	466000	343	24.3	0.016	4.89	6.43	1.68	147.1	59.3	9570	1391	64.4	7.02	18.22	y
1302	TAT21_7	MtCap	3.8	0.21	0.21	0.2822	0.0056	0.0088	0.0971	0.0053	0.0053	0.15565	0.19569	1602	28	45	1575	46	46	1520	110	1520	110	52.4	45.4	462400	211	12.6	0.001	19.81	1.57	1.23	52.9	42.4	8570	646	50	5.47	7.87	y
1303	TAT21_70	MtCap	2.06	0.13	0.13	0.1939	0.0033	0.0058	0.0769	0.005	0.005	0.0041722	0.26315	1142	18	31	1120	43	43	1020	130	1142	31	99.8	76.9	465000	286	17.3	0.008	40.3	2.09	1.23	75.9	48.9	9800	857	58.8	4.86	10.47	n
1304	TAT21_71	MtCap	3.79	0.16	0.16	0.2743	0.0049	0.0082	0.1006	0.0043	0.0043	0.19628	0.24233	1562	25	42	1587	35	35	1597	81	1597	81	86.2	86.4	472000	255	13.2	-8.00E-04	36.4	0.97	0.354	61.2	47.9	11590	747	93.1	10.11	12.52	y
1305	TAT21_73	MtCap	2.937	0.076	0.076	0.2286	0.0029	0.0063	0.0926	0.0021	0.0021	0.36864	0.042959	1327	15	33	1388	20	20	1468	44	1327	33	191.9	391.6	454000	285	12.1	2.07	80	31.8	6.07	112.6	68.1	11150	1164	351.7	34.94	17.14	y
1306	TAT21_74	MtCap	5.01	0.23	0.23	0.3237	0.0063	0.01	0.1119	0.0043	0.0043	0.49293	-0.022072	1807	30	49	1813	38	38	1828	72	1828	72	75.4	120.1	465000	303	20.7	0.22	7.61	1.44	0.36	71.8	44.6	10580	830	150.2	18.44	12.87	y
1307	TAT21_75	MtCap	3.64	0.19	0.19	0.2705	0.0052	0.0084	0.0971	0.0048	0.0048	0.30488	0.1175	1542	26	42	1544	42	42	1534	91	1534	91	92.9	74.7	477000	371	20.5	0.031	39.8	2.15	0.97	95.3	61.6	10630	1098	79.6	8.37	13.54	y
1308	TAT21_76	MtCap	3.69	0.15	0.15	0.2756	0.0042	0.0079	0.0969	0.004	0.004	0.10568	0.23861	1569	21	40	1561	32	32	1529	78	1529	78	57.58	90.5	460500	233	18.9	-9.00E-04	11.85	0.58	0.27	47.9	40.7	10750	621	97.7	10.26	8.38	y
1309	TAT21_77	MtCap	3.92	0.11	0.11	0.2772	0.003	0.0074	0.1015	0.0027	0.0027	0.23583	0.12903	1577	15	37	1614	23	23	1637	50	1637	50	269.5	450	461000	188	5.8	0.346	29.1	5.97	0.71	76.7	53.7	12580	907	492	54.1	38.61	y
1310	TAT21_78	MtCap	3.67	0.18	0.18	0.2639	0.0042	0.0076	0.1001	0.0048	0.0048	0.21227	0.12058	1509	21	39	1552	40	40	1577	93	1577	93	94.2	92	477000	404	18.7	0.0098	22.11	2.48	1.19	135.5	87.1	10130	1523	95.1	10.28	13.51	y
1311	TAT21_79	MtCap	3.79	0.37	0.37	0.268	0.013	0.014	0.107	0.013	0.013	-0.087563	0.51853	1527	66	74	1572	80	80	1660	210	1660	210	45.2	43.8	478000	300	13.3	0.17	27.8	0.86	0.252	48.9	38.7	10980	599	44.2	5.04	6.43	y
1312	TAT21_8	MtCap	4.4	0.13	0.13	0.3088	0.0046	0.0088	0.1055	0.0031	0.0031	0.22558	0.26434	1735	23	43	1710	24	24	1712	55	1712	55	190.5	352	467000	277	4.9	0.312	11.34	13.05	1.99	123.1	14.2	11580	913	417	48.9	25.58	y
1313	TAT21_80	MtCap	3.83	0.11	0.11	0.2819	0.0036	0.0077	0.0982	0.0027	0.0027	0.3157	0.14732	1601	18	39	1595	23	23	1575	52	1575	52	210	209.3	466000	281	12.1	0.032	32.2	2.23	1.13	93.1	76.9	10610	1182	229.9	24.56	31.17	y
1314	TAT21_81	MtCap	4.55	0.12	0.12	0.3074	0.0041	0.0085	0.107	0.0028	0.0028	0.23091	0.2377	1727	20	42	1735	23	23	1735	48	1735	48	170.1	217.5	462000	528	13.6	0.411	17.88	10.35	1.25	129.9	72.5	11480	1421	259.9	29.99	23.37	y
1315	TAT21_82	MtCap	3.057	0.08	0.08	0.2025	0.0035	0.006	0.1092	0.0024	0.0024	0.52388	0.021585	1188	19	32	1419	20	20	1776	40	1776	40	1017	543	426400	1154	75	23.92	390	418	55.3	593	159.1	11520	4850	426	50.5	25	n
1316	TAT21_84	MtCap	2.019	0.063	0.063	0.1658	0.0029	0.0049	0.0881	0.0026	0.0026	0.35019	0.27392	988	16	27	1118	21	21	1366	57	988	27	998	474.6	432500	436	42.3	19.2	305	240	25.4	359	114.4	10400	3201	306	29.12	64.2	n
1317	TAT21_85	MtCap	3.98	0.1	0.1	0.2813	0.0041	0.008	0.1023	0.0025	0.0025	0.36763	0.34901	1597	21	40	1626	20	20	1653	45	1653	45	287.2	300	457000	383	16.4	0.83	72.8	20.6	2.84	126.6	74.2	10870	1354	327.5	36.29	36.4	y
1318	TAT21_86	MtCap	2.02	0.11	0.11	0.1882	0.0042	0.0062	0.078	0.0045	0.0045	0.11159	0.29623	1111	23	34	1110	37	37	1090	110	1111	34	208.7	86.9	473000	252	30.5	0.024	85.1	7.64	2.28	83.4	37.52	8530	806	63.5	5.36	21.42	y
1319	TAT21_87	MtCap	2.19	0.15	0.15	0.19	0.0042	0.0063	0.0838	0.0063	0.0063	0.0087352	0.31891	1120	23	34	1157	53	53	1190	160	1120	34	122.5	59.1	474000	159	27.1	0.063	67	4.63	1.37	58.1	28.47	9070	596	43.5	3.94	12.56	y
1320	TAT21_88	MtCap	4.09	0.14	0.14	0.2967	0.0043	0.0084	0.0995	0.0031	0.0031	0.32079	0.078434	1674	21	41	1647	27	27	1595	58	1595	58	77.1	127.1	451000	303	12.4	0.0094	15.82	0.74	0.313	64.3	53.5	10890	812	145.8	15.91	12.51	y
1321	TAT21_89	MtCap	2.181	0.097	0.097	0.1965	0.0032	0.0057	0.0802	0.0034	0.0034	0.2499	0.12745	1156	17	31	1166	32	32	1175	85	1156	31	205	103.5	466000	174	20.8	0.032	74.8	4.56	1.8	84.9	40.3	9280	865	79	6.93	21.53	y
1322	TAT21_90	MtCap	4.61	0.14	0.14	0.3121	0.0035	0.0083	0.1056	0.0027	0.0027	0.36008	0.060341	1751	17	41	1746	25	25	1712	47	1712	47	118.9	207	461000	432	10.1	0.0031	9.9	1.51	0.319	89.9	58.4	11730	1046	249.1	28.66	19.03	y
1323	TAT21_91	MtCap	2.03	0.17	0.17	0.1903	0.0041	0.0062	0.0773	0.0067	0.0067	-0.0013937	0.27881	1126	23	35	1098	58	58	970	180	1126	35	127.1	53	474000	168	31.5	0.012	72.8	4.99	1.91	62.2	29.16	8850	616	38.4	3.25	13.12	n
1324	TAT21_92	MtCap	2.129	0.071	0.071	0.1961	0.0025	0.0054	0.0788	0.0025	0.0025	0.37675	-0.002263	1154	14	29	1154	23	23	1156	60	1154	29	105.7	232.9	463000	55	3.8	6.00E-04	18.94	0.14	0.055	10.9	31.5	13580	233	175.2	15.08	10.94	y
1325	TAT21_93	MtCap	2.096	0.082	0.082	0.1934	0.0029	0.0055	0.0779	0.003	0.003	0.30934	0.087507	1140	16	30	1147	26	26	1126	76	1140	30	67.5	164.3	467000	222	9.1	-0.00266	8.43	0.96	0.067	75.6	45.8	11590	848	122.4	10.37	7.01	y
1326	TAT21_94	MtCap	2.11	0.2	0.2	0.1905	0.0051	0.0069	0.0787	0.0074	0.0074	0.079131	0.13871	1123	27	37	1126	64	64	1040	190	1123	37	74.3	34.4	476000	160	27.8	0.0029	55.6	2.88	1.22	45.3	23.18	8840	473	25.07	2.18	7.7	y
1327	TAT21_95	MtCap	4.08	0.15	0.15	0.2897	0.0051	0.0087	0.1019	0.0039	0.0039	0.049675	0.38237	1639	25	43	1644	29	29	1630	69	1630	69	146.9	132.6	462000	292	7.4	0.036	25.64	3.59	1.19	101.2	73.8	9610	1205	147	16.2	22.42	y
1328	TAT21_97	MtCap	3.55	0.62	0.62	0.252	0.021	0.022	0.106	0.018	0.018	0.13622	0.25452	1450	110	110	1510	140	140	1630	310	1630	310	77.5	80.2	452000	80	26.4	0.093	11.5	3.3	0.78	88.8	61	10240	1021	81.9	9.2	10.07	n
1329	TAT21_98	MtCap	7.97	0.31	0.31	0.3887	0.0075	0.012	0.1476	0.0052	0.0052	0.41025	0.015015	2115	35	56	2217	35	35	2294	63	2294	63	74.2	73.5	480000	167	7.1	0.212	38	3.87	1.44	27.7	11.61	8930	291.6	109.1	17.58	14.57	y
1330	TAT21_99	MtCap	3.83	0.14	0.14	0.2864	0.0044	0.0082	0.0964	0.0037	0.0037	0.095468	0.29184	1623	22	41	1592	31	31	1556	64	1556	64	75.6	129.4	465000	198	12.5	0.0026	17.31	0.41	0.217	49.7	45.2	11730	647	141.3	14.79	11.26	y
1331	TAT22_0	Trephina	4.36	0.18	0.18	0.3074	0.0045	0.0087	0.1019	0.004	0.004	0.1971	0.13734	1727	22	43	1695	34	34	1626	75	1626	75	81.2	117.9	458000	219	11.4	0.0087	11.54	1.07	0.371	58.9	39.8	10160	717	138.3	15.37	12.9	y
1332	TAT22_1	Trephina	2.222	0.099	0.099	0.2035	0.003	0.0058	0.0788	0.0036	0.0036	0.069936	0.3439	1194	16	31	1180	31	31	1120	91	1194	31	400.6	147.3	460000	164	14.5	1.7	102.1	19.2	4.61	132.4	45.8	9550	1163	113.5	9.71	43.6	y
1333	TAT22_10	Trephina	5	0.12	0.12	0.3329	0.0036	0.0088	0.107	0.0021	0.0021	0.53493	-0.033838	1852	17	43	1815	20	20	1741	35	1741	35	182.7	349.9	461000	453	7.4	0.134	13.2	1.51	0.426	100.2	65.1	11750	1184	438.2	51.6	31.04	y
1334	TAT22_11	Trephina	4.98	0.14	0.14	0.3298	0.0043	0.0091	0.1087	0.003	0.003	0.25234	0.20385	1837	21	44	1816	24	24	1762	50	1762	50	147.7	201.2	456000	401	13.8	0.044	9.81	3.02	0.5	112.6	66.4	11170	1248	250.2	29.79	24.21	y
1335	TAT22_12	Trephina	4.95	0.13	0.13	0.3283	0.004	0.0089	0.1078	0.0025	0.0025	0.44355	-0.02373	1830	20	43	1811	23	23	1760	43	1760	43	81.4	303.5	458000	471	6.2	0.02	6.16	1.2	0.403	80.3	54.9	12340	945	375.1	44.2	13.58	y
1336	TAT22_13	Trephina	0.843	0.055	0.055	0.0669	0.0023	0.0028	0.0908	0.0048	0.0048	0.49111	-0.052	417	14	17	615	29	29	1390	110	417	17	292.1	391	461000	196	26.1	5.06	95	41.2	9.38	139.8	46.9	8890	1207	96.6	9.59	32	n
1337	TAT22_15	Trephina	5.08	0.15	0.15	0.3296	0.0038	0.0089	0.1102	0.003	0.003	0.21488	0.21826	1836	19	43	1829	24	24	1788	50	1788	50	110.7	247.6	450000	458	5.5	-0.00259	5.62	0.99	0.218	111.3	72.4	12010	1286	307.3	37	18.77	y
1338	TAT22_16	Trephina	4.49	0.16	0.16	0.3084	0.0048	0.0089	0.1036	0.0034	0.0034	0.36418	0.13008	1732	24	44	1722	30	30	1689	66	1689	66	115.3	142.6	451000	176	9.8	0.0065	12.68	1.44	0.507	67.6	42.8	10630	791	165	18.91	18.3	y
1339	TAT22_17	Trephina	11.58	0.32	0.32	0.5152	0.0071	0.014	0.1604	0.0031	0.0031	0.65554	-0.12275	2678	30	61	2566	26	26	2453	34	2453	34	108.4	211.7	454000	123	4.67	1.04	25.3	4.76	1.69	35.6	40.11	11980	491	408	72	27.41	y
1340	TAT22_18	Trephina	4.41	0.13	0.13	0.3102	0.0042	0.0086	0.1015	0.0027	0.0027	0.34751	0.19755	1741	21	42	1708	24	24	1637	50	1637	50	84	332	452000	173	3.95	1.36	13.41	6.64	0.77	32.2	30.26	12170	422.3	384.7	42.7	14	y
1341	TAT22_19	Trephina	4.9	0.11	0.11	0.3211	0.0037	0.0086	0.109	0.0023	0.0023	0.31559	0.31804	1795	18	42	1799	19	19	1774	39	1774	39	265.6	434	460000	276	8	1.01	26.6	4.98	1.02	93.8	55	10540	1041	526	62.7	43.7	y
1342	TAT22_20	Trephina	5.38	0.18	0.18	0.3446	0.0053	0.0099	0.1107	0.0038	0.0038	0.23234	0.21893	1908	25	47	1875	29	29	1792	63	1792	63	96.6	175.6	461000	475	8.6	0.0015	6.84	1.04	0.369	100.3	65.9	11590	1164	230.4	27.9	16.82	y
1343	TAT22_22	Trephina	2.295	0.07	0.07	0.2074	0.0023	0.0055	0.0792	0.0024	0.0024	0.22824	0.19695	1215	12	29	1207	21	21	1156	59	1215	29	3.64	541	457000	36	1.51	-0.002541	0.075	0.01	0.079	14.76	60.5	15660	399	417	36.3	0.42	y
1344	TAT22_24	Trephina	2.54	0.11	0.11	0.2219	0.003	0.0062	0.0818	0.0034	0.0034	0.17592	0.1875	1295	17	34	1275	32	32	1217	82	1295	34	13	157.3	452000	37	1.67	-0.002535	1.46	0.049	0.092	12.34	37.5	13780	269.8	130.4	11.65	2.36	y
1345	TAT22_25	Trephina	4.8	0.12	0.12	0.3251	0.0041	0.0089	0.1055	0.0022	0.0022	0.42176	0.050461	1814	20	43	1781	21	21	1714	40	1714	40	169.5	319.1	453000	408	6.8	0.103	6.35	4.06	0.92	152.3	74.5	10700	1621	387.7	45.1	27.8	y
1346	TAT22_26	Trephina	5.05	0.12	0.12	0.3372	0.0042	0.0092	0.1073	0.0026	0.0026	0.24546	0.23343	1873	20	44	1824	21	21	1742	45	1742	45	168.7	321	458000	413	6.8	-0.002549	10.6	1.09	0.342	101.1	66.5	12130	1205	404.7	47.6	28.55	y
1347	TAT22_27	Trephina	4.52	0.4	0.4	0.3041	0.0098	0.012	0.1082	0.0097	0.0097	-0.084342	0.33981	1710	48	60	1725	78	78	1710	180	1710	180	54	47	436000	157	92	0.192	14.67	1.54	1	66.1	37.7	8730	734	52.3	6.27	8.96	y
1348	TAT22_29	Trephina	2.308	0.072	0.072	0.2039	0.0025	0.0055	0.0813	0.0024	0.0024	0.27228	0.10032	1196	13	30	1211	22	22	1207	59	1196	30	838	291.1	460000	319	7.1	0.337	70.7	20.6	9.15	238.1	94.9	8590	2191	220.6	19.72	89.8	y
1349	TAT22_3	Trephina	4.99	0.15	0.15	0.3335	0.0045	0.0093	0.1068	0.003	0.003	0.18453	0.27163	1855	22	45	1813	25	25	1738	55	1738	55	86.2	190.6	448000	393	8.1	-0.00274	4.95	0.71	0.163	85.7	61.3	11860	1050	241.3	28.3	14.51	y
1350	TAT22_30	Trephina	5.04	0.14	0.14	0.3388	0.0042	0.0092	0.1069	0.0027	0.0027	0.24611	0.29556	1880	20	45	1822	23	23	1734	48	1734	48	95.3	301.7	459000	179	1.19	9.00E-04	8.22	0.21	0.195	42.6	40.9	12410	579	381.6	44.6	16.27	y
1351	TAT22_34	Trephina	2.169	0.06	0.06	0.1991	0.0026	0.0055	0.0784	0.002	0.002	0.21708	0.31562	1170	14	30	1168	19	19	1142	53	1170	30	474	577	458000	263	6.3	0.74	34.5	9	3.53	73.7	50.7	9050	891	428.4	36.8	47.8	y
1352	TAT22_35	Trephina	1.581	0.081	0.081	0.1543	0.005	0.0062	0.073	0.0032	0.0032	0.56685	0.045286	924	28	35	956	32	32	980	92	924	35	384	238	445000	651	4.5	0.131	8.72	5.2	0.34	174	78.6	11610	1810	142	11.2	32	y
1353	TAT22_36	Trephina	2.105	0.084	0.084	0.1981	0.0034	0.0059	0.076	0.0025	0.0025	0.46493	0.060173	1165	18	32	1144	27	27	1092	69	1165	32	160.2	174.1	461000	387	9	0.0012	4.64	1.86	0.154	102.5	57.3	12940	1150	130	10.88	17.1	y
1354	TAT22_37	Trephina	18.75	0.52	0.52	0.6244	0.0096	0.018	0.2165	0.0054	0.0054	0.42597	0.21908	3126	38	71	3023	27	27	2944	40	2944	40	43.2	75.9	457000	141	5.9	0.225	5.08	0.32	0.204	27.8	25.98	10810	370.6	175.5	41.6	11.53	y
1355	TAT22_38	Trephina	18.31	0.52	0.52	0.6103	0.0077	0.017	0.2166	0.0061	0.0061	0.13649	0.26442	3070	31	67	3000	27	27	2942	45	2942	45	23.5	69.9	459000	75	6.2	0.0064	2.74	0.07	0.139	14.93	19.19	10790	241.7	160.1	38.1	6.85	y
1356	TAT22_39	Trephina	4.96	0.16	0.16	0.3387	0.0044	0.0093	0.1061	0.0031	0.0031	0.3755	0.034487	1880	21	45	1807	28	28	1714	55	1714	55	102.6	167.7	452100	399	7.1	0.395	6.5	2.53	0.454	122.2	67.1	10190	1349	211.6	24.8	17.33	y
1357	TAT22_4	Trephina	4.28	0.11	0.11	0.3056	0.0039	0.0084	0.1006	0.0027	0.0027	0.11377	0.34628	1719	19	41	1686	22	22	1619	50	1619	50	145.3	214.8	469000	209	8.2	0.032	16.83	0.99	0.244	57.3	41.3	11350	713	249.2	27.34	23	y
1358	TAT22_42	Trephina	4.95	0.14	0.14	0.3292	0.0045	0.0092	0.1091	0.0028	0.0028	0.37789	0.22625	1834	22	44	1806	23	23	1780	46	1780	46	102.2	240.5	462000	472	9.2	0.03	8.13	1.65	0.46	90.1	65.7	12380	1116	294.7	35.4	16.97	y
1359	TAT22_43	Trephina	4.26	0.11	0.11	0.3045	0.0035	0.0082	0.1014	0.0025	0.0025	0.32392	0.063607	1713	17	40	1682	22	22	1637	46	1637	46	346	254.5	459000	270	8.1	0.052	45.6	5.02	2.27	135.8	100.7	9950	1601	291	32.3	53.6	y
1360	TAT22_44	Trephina	2.193	0.066	0.066	0.2013	0.002	0.0053	0.079	0.0022	0.0022	0.32295	0.04079	1182	10	28	1175	21	21	1165	53	1182	28	548	538	460000	190	28.1	12.88	302	58.7	5.69	76.8	48.3	12200	848	405	35.1	54.7	y
1361	TAT22_45	Trephina	4.79	0.13	0.13	0.3228	0.0036	0.0086	0.1072	0.0024	0.0024	0.43712	-0.0053749	1803	18	42	1778	22	22	1749	44	1749	44	117.2	257.8	456000	331	8.4	0.106	12.01	1.82	0.277	67.5	45.2	11850	824	311.6	36.9	18.42	y
1362	TAT22_46	Trephina	5.29	0.21	0.21	0.341	0.0053	0.0098	0.1107	0.0044	0.0044	0.16917	0.19092	1891	25	47	1862	34	34	1794	74	1794	74	73.9	210.1	448000	206	4.3	0.29	10	1.22	0.171	35.4	30.6	11580	478	275	33.4	13.25	y
1363	TAT22_47	Trephina	4.34	0.12	0.12	0.3063	0.0045	0.0087	0.1019	0.0025	0.0025	0.48524	0.14691	1722	22	43	1698	23	23	1650	45	1650	45	1068	679	441000	517	10.5	2.35	99.1	28.9	6.24	422	181.8	9740	4350	786	88	166.5	y
1364	TAT22_48	Trephina	5.71	0.12	0.12	0.3639	0.0035	0.0095	0.1142	0.0023	0.0023	0.38565	0.0703	2000	17	45	1930	18	18	1858	37	1858	37	88.3	347.4	466000	532	7.7	0.96	14.6	19.2	1.61	91.1	62.4	11820	1058	474	59.4	15.06	y
1365	TAT22_49	Trephina	4.74	0.35	0.35	0.3176	0.0082	0.011	0.1077	0.0074	0.0074	0.51317	-0.29501	1777	40	55	1763	63	63	1660	170	1660	170	22.2	68	458000	85	1.47	-0.002451	1.47	0.185	0.45	17.4	16.3	13790	263	84	10.1	3.83	y
1366	TAT22_5	Trephina	5.42	0.13	0.13	0.34	0.004	0.0092	0.1141	0.0022	0.0022	0.61588	-0.061427	1886	19	44	1885	21	21	1858	35	1858	35	15.24	572	445000	434	5.8	2.15	9.95	10.4	0.44	71.5	34.6	13250	715	732	91.3	3.52	y
1367	TAT22_50	Trephina	2.23	0.076	0.076	0.1971	0.0029	0.0056	0.0825	0.0028	0.0028	0.19432	0.29681	1159	16	30	1186	23	23	1233	65	1159	30	341	290	464000	255	15.2	1.69	69.7	12.09	3.94	85.9	42	8980	872	212	19.1	35.8	y
1368	TAT22_51	Trephina	4.43	0.13	0.13	0.3193	0.0045	0.0089	0.1016	0.0028	0.0028	0.34584	0.22349	1786	22	44	1713	24	24	1637	52	1637	52	81.8	148.1	458000	113	8.2	-0.002354	12.09	0.7	0.199	37.6	30.55	11390	503	177.9	19.84	13.27	y
1369	TAT22_52	Trephina	2.378	0.067	0.067	0.2093	0.0023	0.0056	0.0829	0.0021	0.0021	0.2217	0.22257	1225	12	30	1233	20	20	1251	50	1225	30	770	447	454000	293	11	0.392	107.7	6.81	1.9	121.2	51.8	10050	1237	351.7	31.95	85.4	y
1370	TAT22_53	Trephina	4.45	0.12	0.12	0.3132	0.0043	0.0087	0.1037	0.0018	0.0018	0.67185	-0.030575	1756	21	43	1717	23	23	1689	34	1689	34	532	585	457000	306	6.4	6.11	57.7	32.2	2.31	180	84.5	11310	1769	686	78.4	70.2	y
1371	TAT22_54	Trephina	4.81	0.15	0.15	0.3323	0.0044	0.0092	0.106	0.003	0.003	0.30989	0.13265	1849	21	44	1782	25	25	1716	53	1716	53	71.7	217	459000	297	5	-6.00E-04	7.42	0.57	0.283	59.2	42.9	12350	720	270	31.4	12.38	y
1372	TAT22_55	Trephina	2.313	0.079	0.079	0.2065	0.0031	0.0059	0.0822	0.0027	0.0027	0.045463	0.31184	1210	17	31	1217	23	23	1229	66	1210	31	384	187.5	456000	254	14.6	2.95	106	8.63	2.04	69.3	31.19	9340	697	147	13.15	42.2	y
1373	TAT22_56	Trephina	4.23	0.16	0.16	0.3062	0.0044	0.0086	0.1007	0.0037	0.0037	0.055024	0.3212	1721	21	42	1671	30	30	1620	72	1620	72	85	121.8	460000	225	12.6	0.0033	12.73	0.96	0.278	57	38.42	10300	681	140.2	15.61	13.43	y
1374	TAT22_57	Trephina	5.12	0.14	0.14	0.3417	0.0056	0.01	0.1107	0.0028	0.0028	0.46977	0.11637	1894	27	48	1840	25	25	1798	45	1798	45	265	352	462000	323	10.9	1.28	20.3	11.1	1.25	229	107.3	11880	2340	430	49	42.9	y
1375	TAT22_58	Trephina	4.04	0.12	0.12	0.2988	0.003	0.0078	0.0995	0.0029	0.0029	0.30723	0.03636	1688	16	41	1637	23	23	1598	53	1598	53	218	265.7	455000	244	7.9	0.422	12	4.07	0.8	106.8	60.8	11740	1201	299.3	32.8	26.7	y
1376	TAT22_59	Trephina	2.307	0.097	0.097	0.2048	0.0033	0.006	0.0826	0.0035	0.0035	0.17058	0.20065	1201	18	32	1212	29	29	1233	85	1201	32	135.7	168.3	475000	105	13.8	0.35	52.6	3.93	1.93	51.3	27.08	10020	537	130.4	11.83	14.81	y
1377	TAT22_6	Trephina	4.05	0.11	0.11	0.2414	0.004	0.0071	0.1197	0.0029	0.0029	0.40942	0.13985	1393	21	37	1640	23	23	1948	46	1948	46	102.8	202.7	448000	181	18.4	1.02	22.14	5.94	0.99	57.1	36.5	10020	667	185	24.5	21.04	n
1378	TAT22_60	Trephina	4.83	0.15	0.15	0.3318	0.0045	0.0092	0.1079	0.0035	0.0035	0.26163	0.18377	1846	22	45	1790	28	28	1754	56	1754	56	104.7	143.8	459000	649	14.3	0.013	7.01	3.25	0.73	134.2	73.6	10610	1451	180.3	21.31	17.93	y
1379	TAT22_61	Trephina	3.89	0.13	0.13	0.2804	0.0034	0.0076	0.1021	0.0032	0.0032	0.39594	-0.027524	1593	17	38	1606	27	27	1653	55	1653	55	102.2	291	458000	382	10	5.5	18.8	21	2.45	87.9	42.9	11980	886	305	34.5	15.36	y
1380	TAT22_62	Trephina	4.57	0.12	0.12	0.318	0.0043	0.0088	0.106	0.0031	0.0031	0.14239	0.36653	1779	21	43	1740	23	23	1714	55	1714	55	131	202	469000	387	9.2	2.9	33	14.5	2.58	91	50.7	12170	950	240	28	20.1	y
1381	TAT22_64	Trephina	2.07	0.14	0.14	0.1984	0.0038	0.0062	0.0772	0.0053	0.0053	0.11319	0.17519	1166	21	33	1121	46	46	1020	140	1166	33	190.8	74.6	467000	259	17.9	0.087	71.9	7.5	2.82	67.8	25.6	8800	624	55.8	4.71	20.55	n
1382	TAT22_65	Trephina	2.21	0.16	0.16	0.1983	0.0047	0.0067	0.0816	0.0062	0.0062	-0.10834	0.39985	1165	25	36	1161	51	51	1130	160	1165	36	0.81	52.5	461000	77	0.59	0.091	0.77	0.58	0.095	8.47	17.32	13050	184.4	39.5	3.56	0.155	y
1383	TAT22_66	Trephina	4.13	0.15	0.15	0.3029	0.0042	0.0084	0.1011	0.0037	0.0037	0.22985	0.15336	1705	21	42	1658	31	31	1618	67	1618	67	111.8	119.9	460000	237	10	0.0015	13.95	1.14	0.287	57.3	39.05	10620	706	137.3	15.1	17.39	y
1384	TAT22_67	Trephina	4.38	0.11	0.11	0.2997	0.0039	0.0082	0.1076	0.0016	0.0016	0.73252	-0.017725	1690	19	41	1705	20	20	1755	27	1755	27	817	857	449000	188	15.5	2.12	33	14.9	2.25	241.7	121.6	9870	2847	969	114.7	125.5	y
1385	TAT22_68	Trephina	2.023	0.072	0.072	0.1828	0.0024	0.005	0.0825	0.0025	0.0025	0.41111	-0.06542	1082	13	27	1121	24	24	1247	58	1082	27	354	800	462000	761	36.9	58.2	741	226	24.8	222.8	84.1	10090	1640	547	49.7	31.8	n
1386	TAT22_7	Trephina	3.99	0.11	0.11	0.2913	0.0042	0.0082	0.0984	0.0028	0.0028	0.12226	0.40647	1647	21	41	1628	22	22	1576	54	1576	54	120.6	192.2	460000	160	5.1	0.003	16.68	0.83	0.223	55.6	38.87	11230	671	212.6	22.82	18.4	y
1387	TAT22_70	Trephina	2.145	0.082	0.082	0.2035	0.0029	0.0057	0.0784	0.0029	0.0029	0.31702	0.043315	1194	16	31	1163	28	28	1125	76	1194	31	726	273	469000	206	16.1	0.375	123.9	20.3	5.26	218	72.3	9860	1930	209	17.8	76.3	y
1388	TAT22_71	Trephina	2.29	0.11	0.11	0.2048	0.0038	0.0062	0.0807	0.0037	0.0037	0.26596	0.1447	1201	20	33	1204	34	34	1191	95	1201	33	209.6	306.1	449000	90	9.4	0.181	50.8	4.46	1.89	48.7	29.53	10270	534	244	21.5	23	y
1389	TAT22_72	Trephina	4.15	0.11	0.11	0.2963	0.0038	0.0081	0.1035	0.0026	0.0026	0.31214	0.14697	1672	19	40	1661	22	22	1674	46	1674	46	139.9	211.5	456000	171	6.9	0.031	14.96	0.96	0.339	62.5	42.7	10910	762	237.5	26.96	21.73	y
1390	TAT22_73	Trephina	2.23	0.1	0.1	0.2031	0.0037	0.0062	0.08	0.0035	0.0035	0.31256	0.094549	1192	20	33	1184	32	32	1167	85	1192	33	549.6	178.3	454000	490	10.8	0.6	119.6	25.8	7.32	174.8	58.2	9000	1510	139.3	12.1	59.7	y
1391	TAT22_74	Trephina	4.57	0.14	0.14	0.3175	0.0043	0.0088	0.1069	0.003	0.003	0.49382	-0.03644	1777	21	43	1744	25	25	1731	52	1731	52	103.4	182.5	459000	740	3.93	0.81	16.9	4.6	0.66	63.4	41.6	9910	745	220.2	25.81	17.43	y
1392	TAT22_75	Trephina	3.14	0.095	0.095	0.2349	0.0031	0.0065	0.0985	0.0025	0.0025	0.43926	0.007825	1360	16	34	1438	23	23	1583	47	1583	47	1220	718	440000	256	56.5	16.2	111	71	6.27	104	46.2	12590	896	640	69.4	32.7	n
1393	TAT22_76	Trephina	4.58	0.17	0.17	0.317	0.0049	0.0091	0.1067	0.0039	0.0039	0.21619	0.17407	1774	24	44	1737	31	31	1715	70	1715	70	95.2	118.4	461000	190	9.9	0.0026	10.97	0.91	0.2	47	33.8	11510	588	142.8	16.64	15.78	y
1394	TAT22_78	Trephina	2.03	0.11	0.11	0.197	0.0047	0.0067	0.0784	0.0047	0.0047	-0.15926	0.53942	1159	25	36	1122	35	35	1120	120	1159	36	293.7	192.7	487000	538	20.9	13.7	102	24.1	2.86	81.6	39.1	9920	831	140.2	12.03	30.9	y
1395	TAT22_79	Trephina	4.77	0.15	0.15	0.3292	0.0037	0.0088	0.1073	0.0032	0.0032	0.22534	0.1777	1834	18	43	1774	26	26	1736	54	1736	54	97.5	181.1	473000	445	11.1	-0.002164	7.6	0.96	0.379	86.2	56.5	12110	1012	226.2	26.56	16.33	y
1396	TAT22_8	Trephina	4.84	0.11	0.11	0.3214	0.0032	0.0084	0.1077	0.0022	0.0022	0.27332	0.21982	1796	16	41	1788	18	18	1751	37	1751	37	294.5	721	451000	206	4.25	0.276	17.18	2.73	0.75	82.8	61.5	12000	1005	877	103.2	48.9	y
1397	TAT22_80	Trephina	8.68	0.25	0.25	0.435	0.0056	0.012	0.1475	0.004	0.004	0.22485	0.28554	2327	25	54	2299	26	26	2303	47	2303	47	54.3	128.3	465000	235	2.36	0.058	12.68	2.22	0.312	95.7	49.6	8790	1087	212.3	34.7	12	y
1398	TAT22_81	Trephina	4.86	0.11	0.11	0.3254	0.0037	0.0087	0.1108	0.0021	0.0021	0.32594	0.24587	1816	18	42	1792	20	20	1805	34	1805	34	151.6	326.2	458000	404	6.9	0.069	11.02	1.36	0.327	98.4	65.3	12320	1157	404.8	48.9	25.4	y
1399	TAT22_83	Trephina	4.42	0.13	0.13	0.3094	0.0039	0.0084	0.105	0.003	0.003	0.20075	0.23504	1737	19	41	1712	24	24	1705	56	1705	56	100.2	165.5	477000	133	4.55	0.015	15.54	1.28	0.451	61.8	39.34	10820	719	195.3	22.58	16.28	y
1400	TAT22_9	Trephina	2.34	0.12	0.12	0.1997	0.0038	0.0062	0.0832	0.0042	0.0042	0.16454	0.17868	1173	21	33	1213	36	36	1238	98	1173	33	243.5	116.7	462000	239	24.9	0.95	49.2	15.5	5.01	118.3	45.9	8790	1112	87.7	8.06	25.54	y
1401	VIN1_1	VIN1	1.935	0.08	0.15	0.1887	0.0024	0.0046	0.0738	0.0028	0.0052	0.26266	0.087268	1114	13	25	1086	27	52	1008	150	1114	25	175.4	186.5	4.68E+05	195	240	2.23	27.4	7.35	2.01	176	85.5	9090	1820	136	11.46	17.89	n
1402	VIN1_11	VIN1	2.099	0.089	0.17	0.197	0.0033	0.0052	0.0775	0.0035	0.0058	0.065577	0.27015	1159	18	28	1140	29	55	1081	150	1159	28	122.2	120.3	4.77E+05	216	26.7	2.59	19.6	3.87	0.377	60	31.49	11120	655	92.9	8.09	13.32	y
1403	VIN1_12	VIN1	2.176	0.074	0.17	0.1971	0.0031	0.0051	0.0801	0.0027	0.0055	0.22792	0.2578	1159	17	28	1168	24	54	1195	120	1159	28	267	188.8	4.72E+05	194	25.4	0.96	19.76	5.27	0.722	97.7	41.8	10930	962	143.8	12.95	29	y
1404	VIN1_2	VIN1	2.8	0.27	0.33	0.1462	0.0051	0.0059	0.142	0.017	0.019	-0.45371	0.62375	879	29	33	1325	68	84	2100	230	2100	230	296	557	4.75E+05	1344	52	10.1	160	208	39.4	603	160.3	12450	4920	299	51.8	41.5	n
1405	VIN1_22	VIN1	3.97	0.19	0.33	0.2763	0.0094	0.011	0.1032	0.0035	0.0071	0.65959	0.11491	1569	48	57	1613	39	69	1666	130	1666	130	43.9	154.8	4.76E+05	180	27.6	0.43	4.27	2.04	0.322	33.9	23.79	12180	420	166	19.28	7.47	y
1406	VIN1_23	VIN1	3.89	0.14	0.3	0.1499	0.0028	0.0042	0.1905	0.0078	0.014	0.11747	0.38451	900	16	23	1603	29	62	2712	120	2712	120	558	517	4.48E+05	582	82.4	24.6	406	517	92.9	959	154.1	10010	6370	295	64.1	73.7	n
1407	VIN1_24	VIN1	3.5	0.13	0.27	0.1214	0.0037	0.0044	0.2091	0.0047	0.013	0.76517	0.064618	738	21	26	1521	30	64	2896	110	2896	110	766	706	4.71E+05	905	135.1	33.7	602	765	146.3	1406	197.6	11250	9240	336.7	79.1	85.9	n
1408	VIN1_25	VIN1	2.35	0.093	0.18	0.2035	0.0026	0.005	0.0835	0.0032	0.0059	0.16172	0.15842	1194	14	27	1219	29	58	1270	130	1194	27	85.2	135.7	4.70E+05	66	9.5	0.39	10.32	8.5	2.51	45.6	33.16	9440	498	108.6	10.1	7.91	y
1409	VIN1_3	VIN1	3.36	0.16	0.28	0.2535	0.0048	0.0071	0.0963	0.0045	0.0073	0.25177	0.12348	1456	25	37	1482	38	65	1499	150	1456	37	96.2	80.2	4.69E+05	147	6.19	0.0078	8.67	1.52	0.268	49.2	25.92	12110	535	78.4	8.49	13.52	y
1410	VIN1_5	VIN1	1.501	0.044	0.11	0.1403	0.0025	0.0039	0.0773	0.0019	0.005	0.4055	0.1689	846	14	22	928	18	45	1118	130	846	22	276	466	4.62E+05	472	37.3	6.73	139.8	160	32.6	361	82.1	11750	2640	252.7	22.24	17.9	y
1411	VIN1_6	VIN1	3.734	0.099	0.27	0.2812	0.0034	0.0068	0.0961	0.0021	0.0061	0.44702	0.040014	1597	17	34	1574	21	59	1537	120	1537	120	205.1	240.8	4.72E+05	214	7.55	0.073	28.1	1.94	0.68	58.6	48.06	12440	743	263.6	28.49	30.7	y
1412	VIN1_7	VIN1	1.736	0.057	0.13	0.1613	0.0022	0.004	0.078	0.0027	0.0054	0.11219	0.31678	964	12	22	1017	21	48	1115	140	964	22	245.9	407.2	4.79E+05	216	29.1	0.73	25.3	14.8	2.85	98.5	48.7	12160	1008	255.5	22.44	22.64	y
1413	VIN1_8	VIN1	1.781	0.052	0.13	0.161	0.0029	0.0044	0.0804	0.0024	0.0054	0.14332	0.38534	962	16	25	1035	19	48	1184	130	962	25	296.3	467	4.65E+05	300	15.2	2.69	53.1	52.3	8.9	175	59.9	11790	1520	290.8	26.44	28.75	y
1414	VIN2_0	VIN2	3.71	0.13	0.29	0.2776	0.0046	0.0074	0.0972	0.0037	0.0069	0.076065	0.32979	1579	23	37	1566	28	60	1554	140	1554	140	124.4	89.9	488000	335	16.9	0.0022	45.2	2.19	1.12	112	73.8	10990	1277	98.3	10.7	18.47	y
1415	VIN2_1	VIN2	0.967	0.034	0.074	0.1138	0.0014	0.0028	0.0613	0.0021	0.0042	-0.041666	0.37593	694.6	8.4	16	684	17	38	630	160	694.6	16	212.9	382.8	478000	136	9.7	0.117	72.1	3.4	0.98	102.4	55	12340	1098	171.8	11.76	13.08	y
1416	VIN2_10	VIN2	8.98	0.22	0.65	0.4199	0.0052	0.01	0.1544	0.0029	0.0096	0.57391	-0.06277	2259	24	46	2332	22	65	2394	110	2394	110	196	269.7	487000	379	7.6	1.42	156.5	28.8	6.31	127.2	55.7	12130	1145	447.8	76.9	38.6	y
1417	VIN2_100	VIN2	3.554	0.094	0.26	0.2682	0.0033	0.0065	0.0957	0.0025	0.0062	0.22285	0.25319	1531	17	33	1536	21	57	1527	120	1527	120	211.6	352.1	476000	286	6.9	0.311	34.2	9.79	1.78	232.8	117.2	11570	2550	375.5	38.8	30.17	y
1418	VIN2_102	VIN2	2.281	0.093	0.18	0.2005	0.003	0.0051	0.0822	0.0033	0.0059	0.21322	0.13894	1177	16	28	1199	29	56	1230	140	1177	28	172.7	150.6	490000	219	15.4	0.066	68.4	2.47	1.19	69.1	55.9	11930	815	120.1	10.56	18.95	y
1419	VIN2_103	VIN2	0.943	0.071	0.096	0.1098	0.0022	0.0032	0.0619	0.0048	0.006	0.11441	0.14843	671	13	19	669	40	54	580	220	671	19	56.92	65.2	483000	308	35.4	0.068	5.45	7.32	0.95	127.7	52.2	8750	1202	28.45	1.89	3.59	y
1420	VIN2_104	VIN2	4.98	0.16	0.37	0.3206	0.005	0.0083	0.1123	0.0033	0.0074	0.41884	0.085388	1792	24	41	1810	27	63	1820	120	1820	120	221	115.2	479000	290	16.3	0.075	32.6	7.77	2.59	127.3	66.1	9830	1394	147.3	17.93	38.4	y
1421	VIN2_105	VIN2	2.248	0.09	0.18	0.2029	0.0034	0.0054	0.0803	0.0033	0.0058	0.09762	0.2852	1191	18	29	1190	28	54	1168	140	1191	29	250.3	248	475000	237	11.4	0.59	73.3	5.8	1.47	120.2	77.5	11840	1322	200.9	17.35	28.05	y
1422	VIN2_106	VIN2	0.967	0.057	0.087	0.1113	0.0022	0.0032	0.063	0.0037	0.0053	0.18609	0.1312	680	13	18	680	29	45	630	180	680	18	179.3	185.2	468000	217	16.9	0.063	11.88	9.08	0.505	196.1	72.2	9990	1817	82	5.56	11.74	y
1423	VIN2_107	VIN2	2.34	0.21	0.23	0.2086	0.007	0.0067	0.0816	0.0077	0.0075	0.058114	0.27072	1220	38	36	1203	65	69	1120	180	1220	36	76.2	61.2	479000	481	18.2	0.65	31.5	3.81	1.33	64.5	41	11000	714	52.1	4.48	8.7	y
1424	VIN2_108	VIN2	2.241	0.08	0.17	0.202	0.0037	0.0056	0.0803	0.0025	0.0054	0.42945	0.045734	1186	20	30	1188	25	54	1181	140	1186	30	112.5	232.2	480000	109	8.9	0.006	31.4	0.74	0.53	49.8	48	12020	652	185.9	16.1	12.63	y
1425	VIN2_109	VIN2	3.73	0.17	0.3	0.242	0.0044	0.0067	0.1115	0.0052	0.0084	0.17362	0.26447	1396	23	35	1565	38	68	1796	140	1796	140	39.4	93	470000	214	12.4	0.55	60.8	11.5	3.87	73.4	39.2	10420	735	91	10.8	4.91	n
1426	VIN2_11	VIN2	6.37	0.17	0.47	0.3634	0.0058	0.0095	0.1265	0.0035	0.0083	0.053025	0.44289	1997	27	45	2023	24	65	2034	120	2034	120	32.5	107.8	490000	76	3.28	0.0059	10.22	0.225	0.165	14.48	15.47	12260	223.8	155.7	21.91	7.82	y
1427	VIN2_110	VIN2	4.05	0.13	0.3	0.2811	0.0045	0.0074	0.1047	0.0029	0.0069	0.45103	0.049722	1596	23	37	1638	25	60	1694	120	1694	120	195	236	470000	234	4.6	0.595	88	14	4.31	349	139.2	6930	3520	263	29.6	26.9	y
1428	VIN2_111	VIN2	11.74	0.28	0.85	0.4974	0.0076	0.013	0.1721	0.0043	0.011	0.26063	0.34764	2601	33	55	2579	23	68	2567	110	2567	110	286.3	144.9	475000	193	5.43	0.087	16.47	2.24	1.33	30.6	35.51	8570	406	284.7	52.6	74.2	y
1429	VIN2_112	VIN2	2.229	0.09	0.18	0.1995	0.003	0.0051	0.0813	0.0031	0.0057	0.37314	0.025123	1172	16	28	1183	29	56	1196	150	1172	28	137.9	165.1	473000	218	12.2	0.018	43	2.17	1.16	61.7	48.9	11080	758	130.6	11.43	15.69	y
1430	VIN2_113	VIN2	2.23	0.12	0.19	0.2084	0.0039	0.0058	0.0782	0.0041	0.0062	0.27679	0.066532	1220	21	31	1179	39	62	1090	170	1220	31	67.5	83.7	471000	276	19.6	0.045	67.5	2.43	1.05	52.7	36.8	11290	605	69.1	5.83	7.09	n
1431	VIN2_114	VIN2	5.3	0.46	0.54	0.319	0.0075	0.0086	0.121	0.01	0.011	0.11145	0.17371	1784	36	42	1863	73	78	1940	150	1940	150	83	92.4	459000	580	12.7	6.3	41	16	0.77	49.1	32.5	10610	577	120.1	15.2	16.2	y
1432	VIN2_115	VIN2	2.195	0.065	0.16	0.2021	0.0022	0.0048	0.0794	0.0025	0.0053	0.041606	0.32464	1186	12	25	1176	21	52	1159	130	1186	25	214.7	248	472000	263	14.5	0.0102	59.6	1.89	0.84	78.7	61.1	11380	952	198.9	16.95	24.13	y
1433	VIN2_116	VIN2	4.06	0.12	0.3	0.2753	0.0034	0.0067	0.1077	0.003	0.0071	0.42417	-0.070669	1567	17	34	1642	25	61	1746	120	1746	120	227.1	240.8	461000	672	16.5	10.8	191.2	72.3	16.38	173	77.5	11430	1478	263.7	30.6	31.77	n
1434	VIN2_117	VIN2	4.49	0.19	0.34	0.2891	0.006	0.013	0.1149	0.0051	0.0098	0.21816	0.25736	1636	30	68	1726	34	63	1846	140	1846	140	68.9	104.3	469000	189	8.8	0.287	18.2	6	1.92	77.1	36	11590	844	120.5	14.88	11.05	n
1435	VIN2_118	VIN2	2.391	0.088	0.18	0.1879	0.0037	0.0054	0.0933	0.0033	0.0065	0.4274	0.17887	1109	20	29	1234	27	56	1468	130	1109	29	265.2	206.2	474000	583	24.4	2.55	263	55.9	15.7	239	92.4	10250	2061	152.3	15.38	27	n
1436	VIN2_119	VIN2	3.48	0.21	0.32	0.2569	0.0064	0.011	0.0999	0.0058	0.012	0.22876	0.023227	1473	33	56	1511	42	65	1579	170	1579	170	115	100	469000	144	4.4	0.34	21.7	8.6	3.26	51.3	45.4	8490	606	103	11.1	16.7	y
1437	VIN2_12	VIN2	2.25	0.11	0.19	0.2108	0.0038	0.0058	0.0776	0.0038	0.006	0.25358	0.12971	1232	20	31	1187	36	61	1080	170	1232	31	89.3	99.9	487000	222	16.7	0.016	38	1.2	0.74	56.5	41.48	11240	681	83.1	7.04	10.36	n
1438	VIN2_120	VIN2	3.81	0.12	0.29	0.2795	0.0044	0.0073	0.1007	0.0034	0.0069	0.23289	0.24044	1588	22	37	1594	27	64	1613	130	1613	130	71.6	141.4	475000	176	4.97	0.0019	14.58	0.72	0.129	62	45.75	11920	763	156.8	16.94	11.08	y
1439	VIN2_121	VIN2	11.65	0.26	0.83	0.4932	0.0071	0.012	0.1732	0.0032	0.011	0.55967	0.17262	2583	31	54	2573	21	67	2582	110	2582	110	124.6	164	481000	101	5.75	0.019	27.57	2.16	1.51	48.6	31.56	9680	581	319.8	59.5	33.3	y
1440	VIN2_13	VIN2	10.89	0.28	0.79	0.4763	0.0066	0.012	0.1661	0.0044	0.011	0.17586	0.34485	2510	29	52	2509	24	69	2506	110	2506	110	120.6	77.9	483000	298	10.6	0	25.59	1.18	0.21	74.1	47.3	12020	848	147.5	27.06	28.77	y
1441	VIN2_14	VIN2	2.319	0.094	0.18	0.2083	0.0033	0.0055	0.0817	0.0036	0.0061	0.09868	0.22456	1219	18	29	1211	29	56	1195	140	1219	29	253	103.2	477000	350	22.9	0.88	74.4	11.18	2.75	187.9	98.7	10630	1971	85.2	7.74	29	y
1442	VIN2_15	VIN2	2.162	0.062	0.16	0.1693	0.0029	0.0043	0.0931	0.0027	0.0061	0.26747	0.29544	1008	16	24	1167	20	51	1478	130	1008	24	617	351.8	482000	747	31.2	14.5	398	148.6	31.8	475	130.1	8560	3900	230.9	23.81	54.7	n
1443	VIN2_16	VIN2	3.83	0.54	0.6	0.2163	0.0053	0.007	0.125	0.012	0.014	0.99302	-0.87634	1261	28	36	1545	70	78	1930	140	1930	140	217.1	169.3	466000	261	20.8	1.32	179	31.2	8.29	113.9	55.6	11260	1050	144.7	20.6	37	n
1444	VIN2_17	VIN2	2.2	0.14	0.21	0.2101	0.0039	0.0059	0.076	0.005	0.0068	0.039155	0.24446	1229	21	31	1164	44	65	1000	180	1229	31	44.04	51.9	487000	174	21.6	0.016	34.15	1.23	0.613	43.1	28.01	11580	493	43.5	3.63	4.83	n
1445	VIN2_18	VIN2	2.12	0.11	0.18	0.2031	0.0039	0.0058	0.0757	0.0039	0.006	0.19147	0.13065	1191	21	31	1143	36	59	1030	160	1191	31	84.5	72.5	482000	208	26.8	0.013	28.18	1.62	0.711	67.2	45.81	11000	768	58.1	4.86	9.53	n
1446	VIN2_19	VIN2	2.13	0.21	0.26	0.1988	0.0049	0.0064	0.0776	0.0077	0.009	0.090161	0.06578	1168	27	35	1141	69	84	1010	230	1168	35	30.46	28.6	491000	178	28.9	-0.002757	26.63	1.6	0.644	44.9	26.43	10770	503	22.53	1.93	3.51	n
1447	VIN2_2	VIN2	2.24	0.13	0.2	0.207	0.0042	0.006	0.0792	0.0049	0.0068	-0.12448	0.43386	1212	22	32	1180	40	63	1090	180	1212	32	58.6	63	495000	151	18.2	0.014	39.7	1.26	0.554	47.2	32.9	12030	556	51.4	4.5	6.51	n
1448	VIN2_20	VIN2	3.6	0.18	0.32	0.1558	0.0078	0.0068	0.172	0.013	0.018	-0.35213	0.78898	932	43	38	1540	41	67	2520	160	2520	160	498	259	442000	660	56.9	9.6	401	248	85	687	99.2	8760	4290	160.8	30.4	43.1	n
1449	VIN2_21	VIN2	4.27	0.18	0.34	0.2982	0.0052	0.0081	0.1047	0.0044	0.0076	0.39069	-0.0099479	1682	26	40	1683	37	70	1675	130	1675	130	141.8	70.1	483000	208	31.7	0.041	34.9	2.45	1.11	59.9	31.67	10260	621	82.7	9.54	21.83	y
1450	VIN2_22	VIN2	2.575	0.095	0.2	0.1846	0.004	0.0055	0.1023	0.004	0.0073	0.16274	0.40692	1092	22	30	1287	27	56	1648	130	1648	130	177.7	227.2	468000	548	28.9	5.39	252	117	31.3	289	75.2	11110	2100	165.2	18.61	19.13	n
1451	VIN2_23	VIN2	2.184	0.083	0.17	0.1995	0.003	0.0051	0.0798	0.0033	0.0058	0.22441	0.22033	1172	16	27	1170	26	54	1154	140	1172	27	107.8	115.4	489000	254	18.6	0.029	13.09	3.74	0.85	110.7	55.1	10780	1125	91.8	7.96	11.98	y
1452	VIN2_24	VIN2	4.13	0.17	0.33	0.2974	0.005	0.008	0.1009	0.004	0.0072	0.20497	0.19325	1677	25	39	1663	30	58	1638	120	1638	120	114	123	472000	182	6.6	0.062	12.1	2.54	0.57	90.4	47.6	10780	947	141	15.8	18	y
1453	VIN2_25	VIN2	3.13	0.16	0.26	0.2562	0.0047	0.0071	0.0888	0.0046	0.007	0.074886	0.27382	1470	24	36	1434	42	70	1380	160	1470	36	76.1	59.4	481000	122	16.7	0.0102	8.48	3.29	1.73	106.8	62.5	8930	1170	60.1	5.91	10.42	y
1454	VIN2_27	VIN2	19.33	0.35	1.4	0.6075	0.0073	0.015	0.231	0.0035	0.014	0.5071	0.13283	3059	29	58	3056	17	68	3059	100	3059	100	137.5	157.3	485000	188	5.47	0.0034	20.9	0.67	0.324	44.4	32.41	11400	562	377.2	96.3	40.9	y
1455	VIN2_28	VIN2	11.22	0.27	0.81	0.495	0.0071	0.013	0.1655	0.004	0.011	0.36845	0.13963	2591	31	54	2537	23	66	2502	110	2502	110	32.69	77.8	480000	108	9.6	0.0032	9.43	0.48	0.229	23.53	17.66	10210	308.7	151.9	27.76	8.59	y
1456	VIN2_29	VIN2	3.47	0.12	0.26	0.2616	0.0036	0.0065	0.0958	0.0031	0.0065	0.26198	0.14976	1497	18	33	1514	27	59	1531	130	1531	130	240.8	141.7	482000	321	19.9	0.594	37.5	14.4	5.58	223.5	110.2	8670	2348	146	15.53	32.99	y
1457	VIN2_30	VIN2	3.24	0.14	0.26	0.2506	0.0039	0.0065	0.0938	0.004	0.0069	0.275	0.070078	1441	20	34	1456	35	65	1462	150	1441	34	92.9	59.5	485000	134	15.9	0.044	37.7	3.86	2.17	111.8	61.2	9100	1205	58.7	6.05	10.29	y
1458	VIN2_31	VIN2	2.09	0.077	0.16	0.2011	0.0032	0.0052	0.0761	0.003	0.0054	0.19721	0.21395	1181	17	28	1144	27	56	1063	150	1181	28	168.6	126.9	478000	295	11.7	0.078	56	2.86	0.96	83.9	51.7	12430	927	100.1	8.41	17.41	n
1459	VIN2_32	VIN2	2.349	0.097	0.19	0.209	0.0032	0.0054	0.0817	0.0035	0.006	0.16659	0.20913	1223	17	29	1220	30	57	1200	140	1223	29	140.4	153.2	482000	277	5.44	0.017	32.54	1.67	0.474	70.9	53.7	11620	838	126.6	11.39	16.15	y
1460	VIN2_33	VIN2	0.93	0.076	0.099	0.1096	0.0022	0.0032	0.062	0.0053	0.0065	-0.001084	0.24394	670	13	18	654	40	52	530	220	670	18	81.9	82.3	488000	198	29.4	0.091	6.66	11.29	1.23	173.2	61.7	9370	1535	35.49	2.39	5.28	y
1461	VIN2_34	VIN2	1.344	0.036	0.098	0.1333	0.002	0.0034	0.0733	0.002	0.0048	0.24712	0.22197	807	11	19	863	16	43	1015	140	807	19	356.2	405.9	479000	444	18.5	2.4	81.9	59.2	13.51	401	137.3	11020	3652	213.3	17.19	25.05	y
1462	VIN2_35	VIN2	1.271	0.041	0.096	0.1402	0.0019	0.0035	0.0658	0.0019	0.0044	0.41169	0.01018	845	11	20	830	18	42	778	140	845	20	299.9	423.3	479000	76	4.32	0.025	16.13	8.68	0.93	388.4	167.9	11330	4029	233.8	16.98	23.49	y
1463	VIN2_37	VIN2	4.36	0.12	0.32	0.2619	0.0063	0.0083	0.1216	0.0041	0.0083	0.1749	0.55031	1498	32	43	1700	23	60	1959	120	1959	120	200	285.2	478000	1320	38.3	9.4	497	176	41.6	467	135.4	12130	3630	291.3	39.4	22.5	n
1464	VIN2_38	VIN2	0.975	0.079	0.1	0.1137	0.0028	0.0037	0.0638	0.0055	0.0067	0.06925	0.2557	694	16	21	683	43	57	590	230	694	21	63.2	71.4	489000	179	25.4	0.026	4.75	5.07	0.663	129.9	52.3	9610	1204	32	2.22	4	y
1465	VIN2_39	VIN2	2.306	0.078	0.18	0.2097	0.0031	0.0054	0.0807	0.0031	0.0057	-0.0040366	0.3782	1227	17	29	1214	25	56	1179	140	1227	29	106.3	186.2	475000	144	5.82	0.0092	30.26	0.48	0.301	29	30.56	12140	406.9	153.3	13.45	12.13	y
1466	VIN2_4	VIN2	2.217	0.095	0.18	0.2009	0.0034	0.0054	0.0795	0.0032	0.0057	0.24729	0.13118	1180	18	29	1184	29	54	1174	150	1180	29	115.8	111.6	488000	262	28.3	0.027	35.2	2.68	1.35	80.6	51.9	10050	882	88.5	7.88	12.74	y
1467	VIN2_41	VIN2	2.237	0.083	0.17	0.2025	0.0031	0.0052	0.0797	0.0026	0.0054	0.38911	0.022512	1192	16	26	1187	26	54	1176	140	1192	26	165.2	182.4	476000	314	13	0.055	47.5	2.8	1.07	80.7	64.6	11040	946	146.1	12.87	17.98	y
1468	VIN2_42	VIN2	2.363	0.084	0.18	0.2112	0.0028	0.0052	0.0812	0.0028	0.0056	0.25629	0.085035	1235	15	28	1226	26	55	1200	130	1235	28	120.8	158.5	482000	139	9.3	0.077	46.3	1.63	0.598	44	41.28	11940	545	131.9	11.79	12.86	y
1469	VIN2_43	VIN2	2.24	0.13	0.2	0.2065	0.0031	0.0053	0.079	0.0048	0.0067	-0.068766	0.29261	1210	17	28	1186	44	68	1100	200	1210	28	36.95	67.9	488000	198	15.8	-0.002428	7.26	0.96	0.12	60.3	41.74	10520	711	55.1	4.82	4.25	y
1470	VIN2_44	VIN2	4.14	0.13	0.31	0.2971	0.0046	0.0077	0.1014	0.0032	0.0068	0.18416	0.25381	1676	23	38	1657	26	63	1640	120	1640	120	111.6	90.9	484000	251	12.9	0.052	44.5	5.73	2.34	136.4	74.5	9900	1510	106	11.78	17.58	y
1471	VIN2_45	VIN2	2.265	0.082	0.17	0.2045	0.0031	0.0053	0.0806	0.003	0.0057	0.097224	0.30688	1199	17	28	1196	25	54	1178	140	1199	28	186	155.2	483000	259	16	0.51	55.1	2.35	0.82	72.2	62.1	11630	879	124.8	11.05	20.7	y
1472	VIN2_47	VIN2	2.27	0.12	0.2	0.1946	0.0028	0.0049	0.0846	0.0045	0.0068	0.12039	0.1662	1146	15	27	1190	38	61	1260	150	1146	27	95.5	130.9	478000	103	29.7	0.275	76.9	6.4	2.09	47.9	37.3	12500	493	100.1	9.08	7.96	y
1473	VIN2_49	VIN2	2.23	0.14	0.21	0.2014	0.0042	0.0059	0.0799	0.0051	0.007	0.0079605	0.38415	1182	23	32	1182	43	63	1160	170	1182	32	49.76	40.8	488000	157	22.8	0.0083	27.33	1.28	0.81	50.5	36.6	10970	593	32.3	2.89	5.5	y
1474	VIN2_5	VIN2	2.41	0.15	0.22	0.2	0.0035	0.0054	0.0884	0.0055	0.0076	0.38124	-0.097161	1175	19	29	1237	47	69	1310	170	1175	29	95.2	87.5	489000	187	24.2	0.169	47.5	5.3	2.24	90.1	51.5	10430	950	69.1	6.72	10.69	n
1475	VIN2_50	VIN2	2.59	0.11	0.21	0.225	0.0036	0.0059	0.0836	0.0035	0.0061	0.25339	0.19762	1308	19	31	1290	31	59	1242	150	1308	31	118	106.8	482000	180	15.5	0.0072	15.81	1.66	0.631	44.7	27.38	10240	511	94.6	8.67	14.69	y
1476	VIN2_51	VIN2	3.77	0.24	0.3	0.2677	0.0096	0.0077	0.1022	0.0061	0.0072	0.29019	0.2394	1527	49	39	1575	51	65	1620	140	1620	140	83.6	71.1	480000	491	34.6	0.77	89	8.3	2.9	102	59	10970	1015	76.6	8.55	8.77	y
1477	VIN2_52	VIN2	4.09	0.15	0.32	0.2857	0.0045	0.0074	0.1036	0.0039	0.0073	0.13612	0.29813	1619	22	37	1645	30	62	1661	130	1661	130	88.8	83.1	486000	345	18.1	0.0047	25.04	1.75	0.658	89.7	64.1	10760	1043	94.1	10.59	13.5	y
1478	VIN2_53	VIN2	2.63	0.1	0.21	0.196	0.0031	0.0051	0.0975	0.0031	0.0066	0.52528	0.046303	1153	17	28	1301	29	58	1554	130	1554	130	178.6	182.8	425000	544	1160	2.37	101.5	30.1	7.63	135.1	64.1	10380	1256	138.6	14.7	19.15	n
1479	VIN2_54	VIN2	2.191	0.08	0.17	0.2036	0.0033	0.0054	0.0775	0.0028	0.0054	0.082207	0.33397	1194	18	29	1173	25	54	1115	150	1194	29	164.7	164	483000	168	11.6	0.031	39.2	3.41	1.45	91.8	61.7	10960	1030	131.6	11.26	18.11	y
1480	VIN2_55	VIN2	2.236	0.067	0.17	0.2024	0.0026	0.0049	0.0799	0.0023	0.0053	0.36307	0.063855	1188	14	26	1192	22	54	1187	140	1188	26	236.8	252.3	477000	291	17.7	0.336	109.9	9.7	3.1	102	66.8	11520	1098	201.3	17.49	25.62	y
1481	VIN2_56	VIN2	1.86	0.26	0.29	0.1831	0.0072	0.0081	0.074	0.01	0.011	0.14118	0.11179	1082	39	44	1000	100	110	710	330	1082	44	20.15	15.03	488000	239	34.7	0.009	8.82	1.28	0.411	50.1	32.36	11230	566	10.83	0.87	2.01	n
1482	VIN2_57	VIN2	3.41	0.42	0.48	0.272	0.01	0.012	0.093	0.012	0.013	0.048845	0.26317	1546	52	60	1441	99	110	1200	280	1546	60	5.3	9.86	5.00E+05	72	36	-0.002298	0.666	0.69	0.86	22.9	17.31	7120	285.6	10.49	1.04	0.879	n
1483	VIN2_58	VIN2	2.33	0.13	0.2	0.2092	0.0036	0.0057	0.0806	0.0042	0.0064	0.31677	-0.034908	1224	19	30	1215	42	66	1190	160	1224	30	47.6	74.7	481000	243	27.4	0.088	26.74	7.64	2.88	85.8	38.8	9900	837	61.7	5.45	5.24	y
1484	VIN2_59	VIN2	2.27	0.11	0.19	0.1986	0.0039	0.0057	0.0831	0.0042	0.0065	0.10964	0.27962	1167	21	31	1194	36	60	1210	160	1167	31	63.9	81.1	481000	206	11.3	0.0031	12.92	0.97	0.219	66.7	51.2	11880	815	63.6	5.76	6.89	y
1485	VIN2_6	VIN2	2.22	0.14	0.2	0.208	0.0039	0.0058	0.0774	0.0049	0.0067	0.040915	0.26113	1217	21	31	1170	45	66	1030	190	1217	31	57.5	59.6	488000	144	24.4	0.0037	20.76	1.82	0.92	54.4	36.45	10510	634	49.1	4.22	6.88	n
1486	VIN2_60	VIN2	1.3	0.084	0.12	0.1381	0.0025	0.0038	0.0683	0.0046	0.0062	-0.065212	0.29337	834	14	22	841	36	52	770	200	834	22	40.58	82.1	490000	46	8.2	-0.0013	8.18	1.74	0.237	73.5	38.77	9660	774	44.52	3.32	3.12	y
1487	VIN2_62	VIN2	3.31	0.11	0.25	0.2613	0.0035	0.0065	0.0912	0.0028	0.0061	0.32441	0.047625	1496	18	33	1477	26	59	1430	130	1496	33	97.7	163.9	479000	243	3.86	0.0162	20.59	1.61	0.647	85	70.1	10360	1056	169.2	16.88	14.06	y
1488	VIN2_63	VIN2	2.26	0.11	0.19	0.2041	0.0036	0.0056	0.0803	0.0039	0.0062	0.049	0.29847	1197	19	30	1198	32	56	1169	150	1197	30	97.3	91.6	486000	194	16	0.0072	36.2	1.37	0.69	49.4	40.8	11120	611	73.8	6.45	10.78	y
1489	VIN2_64	VIN2	4.1	0.29	0.4	0.2665	0.006	0.0082	0.1112	0.0078	0.01	0.28276	0.066395	1522	31	42	1627	57	80	1720	170	1720	170	28.74	35.67	477000	282	16.7	0.052	8.19	8.39	3.09	207.5	86.7	7030	1958	37.6	4.55	4.78	n
1490	VIN2_65	VIN2	2.387	0.078	0.18	0.1993	0.0029	0.0051	0.0862	0.0024	0.0057	0.53209	-0.10727	1171	16	27	1234	23	54	1325	130	1171	27	205.4	269.3	464000	362	29.7	1.33	101.7	24.4	6.37	107	57.7	11690	998	213.3	20.21	21.16	n
1491	VIN2_66	VIN2	3.82	0.14	0.3	0.2795	0.0045	0.0074	0.0978	0.0034	0.0068	0.23394	0.20449	1588	23	37	1589	30	62	1567	140	1567	140	77.6	113	501000	478	10.3	0.031	19.37	2.12	1.1	103.7	78.3	10450	1191	125	13.31	12.12	y
1492	VIN2_67	VIN2	2.44	0.31	0.35	0.1853	0.0073	0.0082	0.095	0.012	0.013	-0.022257	0.307	1093	40	45	1185	90	100	1220	300	1093	45	24.09	15.54	488000	296	40.5	0.118	9.42	1.65	0.477	56.1	36.7	10730	658	11.34	1.16	2.65	n
1493	VIN2_68	VIN2	2.22	0.18	0.24	0.2051	0.0052	0.0068	0.0794	0.0066	0.0081	0.28724	0.064458	1202	28	36	1168	61	80	1030	220	1202	36	67.2	36.9	485000	292	28.1	0.045	31	4.95	2.28	102.9	50.7	10190	1032	29.8	2.55	7.41	n
1494	VIN2_69	VIN2	3.44	0.12	0.26	0.2677	0.0039	0.0068	0.0932	0.0033	0.0065	0.13354	0.23395	1529	20	34	1512	28	63	1465	130	1529	34	127.4	167	482000	176	17.3	0.0049	11.97	2.55	0.78	78.7	50.2	9860	943	176.7	17.99	17.87	y
1495	VIN2_7	VIN2	2.113	0.062	0.16	0.1662	0.0019	0.0039	0.0923	0.0028	0.0062	0.069869	0.26958	991	10	22	1153	21	54	1462	140	991	22	265.8	324.3	469000	622	22	8.7	720	164.1	36.3	321	65.7	12100	2230	213.8	22	18.84	n
1496	VIN2_70	VIN2	4.2	0.12	0.31	0.2876	0.0037	0.007	0.105	0.0029	0.0069	0.24625	0.2081	1629	18	35	1669	24	61	1699	120	1699	120	159.4	167.5	483000	196	15.8	0.104	19.11	8.81	2.53	138	65.7	9890	1387	190.8	21.81	25.36	y
1497	VIN2_71	VIN2	4.34	0.14	0.33	0.301	0.0049	0.0079	0.1035	0.0028	0.0068	0.46183	0.0095063	1695	24	39	1700	28	65	1673	120	1673	120	87.3	82.6	493000	369	21.7	0.0082	7.83	2.09	0.275	61.3	32.45	10790	670	98.5	11.21	14.36	y
1498	VIN2_72	VIN2	2.198	0.079	0.17	0.2007	0.0028	0.005	0.0783	0.0029	0.0055	-0.024176	0.36788	1179	15	27	1175	25	54	1134	150	1179	27	91.4	150.3	475000	249	10.8	0.0047	17.07	0.62	0.166	61.6	53.1	13570	776	119	10.24	9.85	y
1499	VIN2_73	VIN2	4.28	0.13	0.32	0.2838	0.004	0.0071	0.1082	0.0032	0.0072	0.29157	0.18185	1610	20	36	1683	26	62	1761	120	1761	120	148.3	183.8	481000	1048	16.7	1.53	56.5	32.2	7.26	225.1	125.1	11750	2346	206.3	24.14	20.01	y
1500	VIN2_74	VIN2	2.07	0.071	0.16	0.1923	0.0031	0.0051	0.0776	0.0029	0.0055	-0.00016098	0.42277	1133	17	27	1134	24	52	1119	130	1133	27	180.2	219.4	490000	198	15.3	0.018	24.75	1.27	0.252	60.6	50.7	11590	762	167.5	14.13	18.89	y
1501	VIN2_75	VIN2	2.076	0.075	0.16	0.1916	0.0036	0.0053	0.078	0.0029	0.0055	0.16416	0.33035	1130	19	29	1135	25	54	1112	150	1130	29	101.6	114	481000	265	10.3	-0.001976	14.4	0.9	0.248	68.6	54.5	11710	828	86.3	7.38	11.01	y
1502	VIN2_76	VIN2	3.38	0.36	0.43	0.2566	0.009	0.01	0.095	0.01	0.012	-0.023528	0.29942	1469	46	53	1459	77	92	1360	230	1469	53	7.67	13.72	490000	277	26.6	0.0012	3.79	1.27	2.9	54.3	34.1	6560	605	13.94	1.41	1.14	y
1503	VIN2_77	VIN2	4.57	0.1	0.33	0.3005	0.0065	0.009	0.1095	0.0026	0.007	0.41825	0.50944	1692	33	45	1740	19	60	1778	120	1778	120	127.2	204.9	473000	328	14.5	0.71	50	21.2	6.4	77	35.3	9380	721	243.7	29.18	20.27	y
1504	VIN2_78	VIN2	2.28	0.12	0.2	0.2013	0.0036	0.0055	0.0821	0.0043	0.0065	0.26526	0.071855	1182	19	30	1200	38	62	1180	160	1182	30	63.7	77.3	471000	122	20.8	0.015	23.9	0.6	0.438	35.4	30.43	11260	437	61.7	5.44	7.35	y
1505	VIN2_79	VIN2	2.342	0.084	0.18	0.1972	0.0029	0.005	0.0853	0.0031	0.0059	0.23127	0.21728	1160	16	27	1219	26	55	1309	130	1160	27	141.5	168.5	447000	285	2430	2.4	83.7	18.6	4.39	116.4	51.4	9820	1078	132.3	12.26	12.4	n
1506	VIN2_8	VIN2	2.29	0.12	0.2	0.2006	0.0032	0.0053	0.0828	0.004	0.0064	0.57556	-0.36005	1178	17	28	1197	37	61	1230	160	1178	28	122.6	100.6	490000	265	18.8	0.99	45.2	2.43	0.69	58.4	45.97	11860	677	79.7	7.3	13.49	y
1507	VIN2_80	VIN2	0.96	0.11	0.13	0.1069	0.0036	0.0042	0.0629	0.0068	0.0077	0.31099	0.084261	654	21	25	664	58	68	570	260	654	25	44.46	29.48	485000	244	26.9	0.0015	8.61	1.51	0.494	66.8	38.45	10860	744	12.54	0.88	2.92	y
1508	VIN2_81	VIN2	2.35	0.12	0.2	0.2032	0.0026	0.005	0.0828	0.0043	0.0066	0.073783	0.19071	1192	14	27	1216	37	61	1200	160	1192	27	81.3	84.3	482000	287	23.3	0.083	34.13	2.53	1.02	79.4	54.4	11330	894	68.2	6.15	9.42	y
1509	VIN2_82	VIN2	1.17	0.1	0.13	0.1369	0.0041	0.005	0.0618	0.0053	0.0064	0.23069	0.085276	826	23	28	777	51	65	560	230	826	28	19.43	46.89	485000	88	7.4	-0.001968	5.43	0.56	0.134	50.1	26.35	10290	559	25.34	1.71	1.52	y
1510	VIN2_83	VIN2	2.78	0.11	0.22	0.1809	0.0038	0.0053	0.1113	0.0052	0.0084	-0.06624	0.531	1071	21	29	1344	31	60	1776	140	1776	140	203	137.6	493000	358	53	1.17	67.7	30.1	9.08	159.3	69.8	11920	1409	99	11.93	20.4	n
1511	VIN2_84	VIN2	2.39	0.086	0.18	0.209	0.0023	0.0049	0.0818	0.0029	0.0057	0.19802	0.11946	1223	12	26	1234	26	56	1211	140	1223	26	126.1	221.9	476000	170	10.3	0.055	30.6	2.56	0.69	68.4	40.8	11190	776	184.3	16.33	13.03	y
1512	VIN2_85	VIN2	4.87	0.1	0.35	0.3196	0.0042	0.0079	0.1092	0.0023	0.0069	0.32241	0.31433	1787	20	38	1794	18	60	1777	120	1777	120	134.5	284	469000	385	88	1.18	80.2	11.8	3.29	95	52.8	12260	1029	360.3	42.9	19.19	y
1513	VIN2_86	VIN2	3.555	0.073	0.25	0.2667	0.0029	0.0063	0.0955	0.0017	0.006	0.47858	0.023818	1524	15	32	1537	16	56	1531	120	1531	120	228.5	284.3	471000	273	12.4	0.94	76.1	24.1	7.08	92.2	41.2	11390	799	301.5	31.3	29.05	y
1514	VIN2_87	VIN2	2.349	0.074	0.18	0.2028	0.0029	0.0051	0.0827	0.0023	0.0055	0.45703	-0.0263	1190	16	28	1223	23	55	1243	140	1190	28	255	264	477000	276	15.2	0.155	62.8	4.53	1.87	110	79.9	11750	1280	214	19.3	28.6	y
1515	VIN2_88	VIN2	3.554	0.089	0.26	0.2716	0.0038	0.0068	0.0938	0.0022	0.006	0.41791	0.16556	1548	19	34	1536	20	58	1493	120	1548	34	247.7	356.8	478000	75	3.3	0.0078	7.52	0.53	0.326	16.22	26.64	8060	253.1	385.6	39.3	36.4	y
1516	VIN2_89	VIN2	3.62	0.11	0.27	0.2694	0.0039	0.0069	0.0958	0.0032	0.0066	0.18835	0.24669	1537	20	35	1550	24	59	1534	120	1534	120	149.3	127	492000	119	11	0.062	15.25	4.03	1.89	57.8	44.54	7500	674	136.7	14.21	21.26	y
1517	VIN2_9	VIN2	2.13	0.13	0.19	0.2016	0.0046	0.0062	0.0771	0.0048	0.0066	0.13379	0.22229	1183	25	33	1144	42	63	1040	180	1183	33	69.8	56.5	491000	249	22.9	0.0059	29.8	1.61	1.03	58.6	41.89	11150	672	45	3.84	7.77	n
1518	VIN2_90	VIN2	2.34	0.11	0.19	0.2015	0.004	0.0058	0.0837	0.004	0.0064	0.20511	0.19583	1183	22	31	1216	33	58	1238	150	1183	31	73.8	76.4	481000	183	14.8	0.034	28.1	1.62	0.64	45.4	33.89	11810	530	60.8	5.53	7.65	y
1519	VIN2_91	VIN2	2.45	0.16	0.23	0.208	0.0043	0.0061	0.0846	0.0053	0.0073	0.20588	0.093583	1217	23	32	1238	48	70	1210	190	1217	32	59.9	48.5	480000	261	31.7	0.31	39.6	2.98	1.18	73.8	39.9	10620	791	40	3.64	6.84	y
1520	VIN2_92	VIN2	2.22	0.14	0.2	0.1997	0.0044	0.006	0.0802	0.0053	0.0072	0.056922	0.28024	1173	24	33	1170	43	64	1110	180	1173	33	109	62	481000	224	16.7	0.022	35.7	3.12	1.62	94.6	55.7	10790	1008	49.4	4.22	11.97	y
1521	VIN2_93	VIN2	2.2	0.12	0.19	0.1984	0.0039	0.0057	0.0802	0.0038	0.0061	0.5984	-0.36832	1166	21	31	1170	35	56	1177	160	1166	31	98.2	162.6	479000	230	13	0.018	10.03	0.71	0.251	58.9	43.61	11590	721	128.2	11.08	11	y
1522	VIN2_94	VIN2	2.4	0.069	0.18	0.1994	0.0028	0.005	0.0867	0.0028	0.0059	-0.0546	0.47765	1172	15	27	1239	21	53	1331	130	1172	27	140	182.2	476000	214	16.3	0.84	50	15.5	3.4	82	40.4	11500	812	144.5	13.49	14.8	n
1523	VIN2_95	VIN2	2.25	0.26	0.3	0.1471	0.0043	0.0053	0.113	0.013	0.015	0.18289	0.023079	884	24	30	1153	83	96	1570	260	1570	260	53.5	45.6	487000	161	55.5	0.186	13.48	3.72	0.512	76.9	41.75	8440	780	26.5	3.31	5.53	n
1524	VIN2_96	VIN2	2.17	0.32	0.36	0.1796	0.0066	0.0076	0.087	0.013	0.014	0.15626	0.13879	1063	36	42	1090	110	120	940	360	1063	42	18.08	13.62	483000	227	35.5	0.0061	8.09	1.06	0.397	45.9	29.17	10810	545	9.76	0.91	1.9	n
1525	VIN2_97	VIN2	4.58	0.17	0.35	0.2787	0.0053	0.0079	0.1188	0.0042	0.0082	0.4138	0.075365	1589	28	42	1744	32	67	1927	120	1927	120	79.5	112	443000	192	166	0.62	39.1	9.8	3.1	72	44.3	9710	771	123.7	15.74	11.86	n
1526	VIN2_98	VIN2	3.97	0.12	0.3	0.2898	0.0043	0.0074	0.0994	0.0035	0.0069	-0.023761	0.45252	1640	21	37	1627	26	64	1587	130	1587	130	76.2	124.1	478000	199	6.31	0.206	14.22	1.68	0.221	82.9	54.1	10680	949	143.4	15.42	11.8	y
1527	vin4_0	VIN4	3.96	0.14	0.15	0.2719	0.0063	0.014	0.1054	0.0032	0.0038	0.54071	0.20393	1549	32	70	1618	29	30	1702	68	1702	68	143.9	269.2	465000	291	18	4.2	620	66	11.2	161	54.2	11690	1430	292.7	34.2	19.54	y
1528	vin4_1	VIN4	2.087	0.063	0.068	0.163	0.0052	0.009	0.093	0.003	0.0035	0.36324	0.54252	972	29	50	1141	21	23	1475	75	972	50	242	503	448000	923	46.4	13.1	1980	211	37.6	452	102.2	12260	3620	329.1	34.3	20.3	n
1529	vin4_10	VIN4	1.268	0.058	0.06	0.135	0.0018	0.0063	0.0681	0.0029	0.0032	0.25939	0.03216	816	10	36	826	26	27	825	100	816	36	319.1	259.2	477000	231	14.3	0.82	157.1	8.45	2.08	100.4	84.4	11700	1274	140.7	10.73	23.57	y
1530	vin4_100	VIN4	1.95	0.089	0.092	0.1646	0.0037	0.0083	0.0849	0.0036	0.004	0.39139	0.14158	982	21	46	1090	31	32	1270	96	982	46	215	171.8	449000	258	19.7	2.97	549	46.7	10.2	161	71.2	10470	1520	115.1	10.84	14.44	y
1531	vin4_101	VIN4	2.411	0.077	0.083	0.2058	0.004	0.01	0.0839	0.0024	0.0029	0.46823	0.067756	1206	21	54	1241	23	25	1271	70	1206	54	127.8	224.7	471000	333	12.4	1.17	180	22.9	4.62	108.5	97.4	10760	1278	188.6	17.59	14.68	y
1532	vin4_102	VIN4	1.63	0.12	0.12	0.1238	0.0023	0.006	0.0935	0.0057	0.006	0.5171	-0.22218	752	13	35	965	43	44	1440	120	752	35	94.5	135.3	445000	79	145	0.52	51.5	2.71	0.472	73.5	37.15	10410	795	68.4	6.95	8.68	n
1533	vin4_11	VIN4	2.172	0.094	0.098	0.1998	0.0029	0.0095	0.079	0.0034	0.0038	0.18283	0.13444	1174	16	51	1164	31	32	1127	100	1174	51	167.4	105.8	477000	201	16	0.018	46.4	1.25	0.406	39.5	26.12	11630	474	85.2	7.53	18.57	y
1534	vin4_12	VIN4	1.616	0.055	0.058	0.1532	0.003	0.0075	0.0763	0.0022	0.0027	0.44398	0.073639	918	17	42	973	21	22	1092	73	918	42	103.2	412.2	487000	901	71.4	3.23	552	63.2	12.5	274	95.8	13520	2690	253.7	21.6	8.64	y
1535	vin4_13	VIN4	1.9	0.17	0.17	0.1445	0.0023	0.0069	0.0949	0.0079	0.0081	0.32918	-0.12799	870	13	39	1053	57	57	1380	170	870	39	202.3	197.1	448000	245	4220	0.95	55.2	6.66	2.67	134.3	89.6	7460	1535	115.1	12.4	19.9	n
1536	vin4_14	VIN4	1.047	0.049	0.05	0.1167	0.0017	0.0055	0.0653	0.0031	0.0034	0.067863	0.2466	711.5	9.9	32	722	24	25	730	110	711.5	32	162.6	231.6	468000	217	7.4	0.39	72	7	1.06	164.8	64.8	12280	1665	108.3	7.87	11.02	y
1537	vin4_15	VIN4	12.29	0.29	0.32	0.5024	0.0057	0.023	0.1776	0.0037	0.0051	0.43469	0.027045	2623	25	100	2623	22	25	2623	48	2623	48	202.1	265.4	479000	249	6.36	0.049	9.31	4.56	3.19	222.9	138.8	8700	2563	536	106.4	52	y
1538	vin4_17	VIN4	5.25	0.37	0.38	0.2989	0.0053	0.014	0.1262	0.0071	0.0076	0.79641	-0.66344	1685	26	72	1832	56	57	1988	100	1988	100	88.7	185.4	479000	161	3700	1.16	32.8	3.53	0.55	60.8	41.81	12110	739	222.9	31.7	20.6	n
1539	vin4_18	VIN4	1.626	0.064	0.067	0.1656	0.0024	0.0078	0.0703	0.0024	0.0027	0.23984	0.11399	987	13	43	975	24	25	936	87	987	43	129.6	307.5	476000	464	10.1	-0.002671	4.65	1.02	0.147	98.3	62	12590	1179	205	16.22	11.99	y
1540	vin4_19	VIN4	0.964	0.055	0.056	0.1096	0.0018	0.0053	0.0639	0.0034	0.0036	0.31344	-0.023584	670	11	31	683	29	30	690	130	670	31	149.6	272.4	486000	640	11.2	60	195	119	1.02	165.8	74.4	12010	1696	120.5	8.61	9.32	y
1541	vin4_2	VIN4	1.93	0.15	0.15	0.1894	0.0043	0.0095	0.0739	0.0058	0.006	0.12287	0.17453	1118	23	52	1076	51	51	940	160	1118	52	91.2	45.8	482000	144	20.5	0.118	51.6	3.13	0.829	81.2	56.3	11080	924	34.8	2.86	9.18	n
1542	vin4_20	VIN4	3.94	0.16	0.17	0.2805	0.0052	0.014	0.1022	0.0041	0.0045	0.41982	0.0087288	1593	26	69	1618	32	33	1632	81	1632	81	58.03	93.8	487000	264	13.4	0.027	24.4	1.26	0.335	60.9	41.2	11360	746	105.6	12.02	8.64	y
1543	vin4_21	VIN4	1.834	0.065	0.069	0.1763	0.002	0.0082	0.0757	0.0027	0.0031	0.12097	0.21031	1047	11	45	1053	23	25	1056	85	1047	45	145.4	248.3	476000	168	17.9	0.207	38.9	4.23	0.73	56.7	33.03	11920	640	175.9	14.82	14.68	y
1544	vin4_22	VIN4	1.904	0.057	0.062	0.1288	0.004	0.007	0.1086	0.0037	0.0043	0.39399	0.58054	780	22	40	1079	20	21	1752	74	1752	74	282	541	443000	977	78.5	25.8	3610	408	70.5	710	135.6	12980	5400	273.2	33.1	21.1	n
1545	vin4_23	VIN4	2.582	0.075	0.081	0.2133	0.003	0.01	0.0884	0.0022	0.0029	0.4265	0.05622	1246	16	53	1291	21	23	1385	60	1246	53	186.7	335.1	468000	285	19.8	4.39	374	50.3	7.71	158.3	62.5	10700	1554	285.3	28.1	21.57	n
1546	vin4_24	VIN4	4.05	0.16	0.17	0.1809	0.0098	0.013	0.1667	0.0049	0.0059	0.84729	0.54105	1068	53	68	1640	33	34	2509	60	2509	60	492	712	441000	1350	210	42.8	7150	834	158	1382	196.2	11880	9730	498.5	92.4	58.8	n
1547	vin4_25	VIN4	2.29	0.12	0.12	0.2023	0.0034	0.0097	0.0825	0.0038	0.0041	0.55872	-0.32441	1187	18	52	1198	35	36	1229	98	1187	52	144	167.1	471000	570	13.7	5.8	128	18.8	1.86	72.3	36.1	11750	749	136.2	12.48	15.73	y
1548	vin4_26	VIN4	2.198	0.091	0.095	0.1952	0.0027	0.0092	0.0815	0.0033	0.0036	0.20082	0.16695	1149	15	50	1173	29	30	1209	92	1149	50	307	150.6	484000	241	23.3	0.67	170	10.9	2.13	73.4	39.5	11010	800	117.2	10.74	31.1	y
1549	vin4_27	VIN4	4.84	0.15	0.16	0.2997	0.0044	0.014	0.1174	0.003	0.0038	0.53024	-0.059997	1693	21	67	1785	26	28	1904	59	1904	59	105.6	227.7	461000	436	28.5	3.21	505	53	10.32	154.2	28.9	12750	1217	274.4	35.8	15.82	n
1550	vin4_28	VIN4	3.92	0.1	0.11	0.2621	0.0032	0.012	0.1091	0.0026	0.0034	0.4518	0.011435	1500	16	62	1615	22	24	1772	58	1772	58	102.3	407	471000	879	13.9	5.99	594	73.7	11.14	227.6	126.9	13600	2503	430	52.1	12.36	n
1551	vin4_29	VIN4	3.149	0.099	0.11	0.1714	0.0028	0.0082	0.1327	0.0032	0.0042	0.58338	-0.10322	1019	15	45	1440	24	26	2130	58	2130	58	464	342	444000	927	76.5	19.58	3230	343	67.7	719	172.4	9450	5690	235.3	34.7	43.8	n
1552	vin4_3	VIN4	2.56	0.26	0.26	0.1779	0.0038	0.0089	0.1065	0.0099	0.01	0.73521	-0.51607	1055	20	48	1259	57	58	1650	150	1650	150	221	177.1	466000	690	57.5	11.2	956	101	16.1	209	70.7	10810	1860	126.9	15	20.2	n
1553	vin4_30	VIN4	4.25	0.13	0.14	0.2928	0.0036	0.014	0.1062	0.0031	0.0037	0.37719	0.061721	1655	18	68	1677	26	28	1717	64	1717	64	74	210.5	492000	508	9.6	0.268	56.9	4	0.8	102.3	78.7	13340	1267	245.1	28.77	9.67	y
1554	vin4_31	VIN4	1.74	0.046	0.051	0.1029	0.0024	0.0052	0.1234	0.0027	0.0036	0.53874	0.30257	631	14	31	1021	17	19	2004	56	2004	56	583	744	434000	1158	112.4	39.1	5560	609	103.9	1000	159.1	11340	7440	302.7	41.5	39.11	n
1555	vin4_32	VIN4	1.906	0.079	0.082	0.1497	0.004	0.0079	0.0928	0.0033	0.0038	0.46217	0.16845	898	23	44	1077	27	28	1468	81	898	44	211	438.8	461000	368	73.8	9.86	1210	132.9	22.6	269	81	12230	2280	261.8	26.8	16.71	n
1556	vin4_33	VIN4	3.52	0.18	0.18	0.2092	0.007	0.012	0.1252	0.0058	0.0063	0.45965	0.23	1222	37	62	1519	39	40	2003	92	2003	92	83.3	138.1	471000	226	45.4	5.53	869	81.2	15.8	156	37.1	9860	1280	111.2	15.33	5.67	n
1557	vin4_34	VIN4	3.54	0.11	0.11	0.237	0.0033	0.011	0.1092	0.0029	0.0037	0.50102	-0.062494	1371	17	58	1531	24	26	1772	61	1772	61	170.4	346.8	451000	384	33.6	9.35	1081	138.1	22.8	246	74.1	13310	2072	326.9	39.3	22.22	n
1558	vin4_35	VIN4	3.025	0.081	0.089	0.2167	0.0051	0.011	0.1021	0.0026	0.0033	0.51694	0.4717	1263	27	59	1410	20	23	1667	61	1667	61	247.6	402	463000	337	38	9.75	1440	153	25.7	284	55.7	9360	2110	345.3	39.1	27.78	n
1559	vin4_36	VIN4	3.62	0.1	0.11	0.2696	0.003	0.013	0.0985	0.0028	0.0034	0.19308	0.23128	1538	15	64	1550	23	25	1578	64	1578	64	180.9	223.8	463000	651	4.83	0.196	84	4.32	1.86	188.1	135.3	12440	2331	240.2	26.12	26.3	y
1560	vin4_37	VIN4	2.08	0.1	0.11	0.1964	0.0032	0.0094	0.0775	0.0037	0.004	0.39991	-0.07011	1156	18	51	1137	37	38	1090	110	1156	51	89.8	98	470000	152	20.9	0.0049	10.47	1.07	0.135	41.5	25.22	11310	490	76.4	6.6	9.78	y
1561	vin4_38	VIN4	14.01	0.43	0.47	0.5342	0.0078	0.025	0.1925	0.0059	0.0071	0.26164	0.21166	2758	33	110	2743	30	32	2747	61	2747	61	36.1	72.5	463000	241	23.9	0.232	43.6	3.87	0.82	76.8	47.8	9000	895	153.5	32.5	8.66	y
1562	vin4_39	VIN4	1.773	0.081	0.083	0.1585	0.0046	0.0085	0.0826	0.0038	0.0041	0.37896	0.33246	948	26	47	1028	29	30	1211	100	948	47	141	264	478000	643	19.6	3.27	500	61	10.9	241	113.3	12310	2440	161.7	14.83	12.67	y
1563	vin4_4	VIN4	1.732	0.081	0.084	0.1685	0.0028	0.0081	0.0744	0.0035	0.0038	0.1099	0.21292	1004	15	45	1013	31	32	1020	100	1004	45	98.1	211.2	456000	190	40.5	0.87	92.8	5.9	1.11	89.1	41.7	11940	931	144	11.96	8.24	y
1564	vin4_40	VIN4	2.073	0.098	0.1	0.1967	0.0029	0.0093	0.0776	0.0038	0.0041	0.1172	0.19629	1157	16	50	1131	32	33	1082	110	1157	50	109	130.1	485000	242	21.1	0.0068	16.52	1.54	0.373	59.3	39.78	11620	710	101	8.61	11.57	y
1565	vin4_41	VIN4	1.988	0.088	0.091	0.1846	0.0031	0.0089	0.0793	0.0035	0.0039	0.19796	0.2086	1091	17	48	1104	30	31	1134	98	1091	48	205.7	172.6	484000	230	33.7	0.98	212	18.1	3.46	94.7	42	12170	965	124.6	10.95	18.01	y
1566	vin4_42	VIN4	10.06	0.26	0.29	0.4528	0.0055	0.021	0.1633	0.0039	0.0051	0.41064	0.05971	2407	25	94	2435	24	26	2479	53	2479	53	35.3	176.4	488000	227	16.3	0.178	77	1.95	0.574	71.6	66	13650	966	314.5	56.6	5.97	y
1567	vin4_43	VIN4	2.135	0.076	0.081	0.1982	0.0027	0.0093	0.0793	0.0029	0.0033	0.12359	0.26689	1166	15	50	1155	25	26	1148	84	1166	50	125.4	194.2	472000	348	2.74	0.023	26.4	1.21	1.06	78.9	55.2	12990	929	152.3	13.31	13.33	y
1568	vin4_44	VIN4	3.46	0.12	0.13	0.2574	0.0041	0.012	0.099	0.0036	0.0041	0.16663	0.25743	1476	21	63	1511	27	29	1592	71	1592	71	113.6	169	482000	593	34.2	3.73	70.6	12.3	0.481	86.6	79.2	12070	1127	171.1	18.59	15.52	y
1569	vin4_45	VIN4	1.991	0.091	0.094	0.1825	0.0041	0.0092	0.0811	0.0036	0.004	0.24336	0.28372	1080	23	50	1104	31	32	1195	100	1080	50	205	116.7	478000	406	30.5	0.51	119	11	2.72	181.3	79.2	11680	1811	82.1	7.3	19.55	y
1570	vin4_46	VIN4	2.1	0.11	0.12	0.1916	0.0032	0.0092	0.0804	0.004	0.0044	0.34209	-0.063987	1130	17	50	1145	39	40	1160	120	1130	50	149.1	93.2	490000	335	22.2	0.029	38.1	4.55	1.07	148.3	72.6	11510	1572	70.3	6.16	14.65	y
1571	vin4_47	VIN4	2.039	0.049	0.055	0.1896	0.0023	0.0088	0.0797	0.002	0.0025	0.30513	0.18759	1119	12	48	1126	17	19	1175	63	1119	48	242.6	354	481000	109	5.86	0.0046	13.82	0.49	0.09	49.9	46.99	15650	652	263.2	23.16	25.66	y
1572	vin4_48	VIN4	9.94	0.3	0.32	0.4168	0.0088	0.021	0.1761	0.0036	0.005	0.7177	-0.042745	2244	40	94	2428	26	28	2608	47	2608	47	114.4	287.8	452000	1320	29.4	8.71	1119	130	22.1	411	224.3	13890	4370	468	91.1	21.43	n
1573	vin4_5	VIN4	1.89	0.11	0.11	0.1819	0.0037	0.009	0.0753	0.0042	0.0044	0.27048	0.16047	1077	20	49	1066	38	39	1000	130	1077	49	73	100.6	471000	192	17.6	1.87	11.68	3.04	0.118	53.1	30.68	11210	624	74	6.21	7.63	y
1574	vin4_51	VIN4	4.12	0.14	0.14	0.2909	0.0036	0.014	0.1039	0.0031	0.0037	0.42337	-0.07945	1646	18	68	1652	27	29	1687	63	1687	63	131.9	171.1	480000	326	7.71	2.7	22.8	5.6	0.464	69	45.8	11510	823	195	22.45	20.41	y
1575	vin4_52	VIN4	12.65	0.34	0.37	0.5052	0.0066	0.024	0.1839	0.0044	0.0058	0.44013	0.071962	2635	28	100	2648	26	28	2678	52	2678	52	79	104.7	490000	180	11.1	0.0094	44.7	2.95	0.323	58.3	39.22	9340	651	207.5	42.1	20.4	y
1576	vin4_53	VIN4	4.84	0.22	0.22	0.2863	0.0038	0.013	0.1246	0.005	0.0055	0.37175	-0.099609	1623	19	68	1788	38	39	2019	85	2019	85	238	329.1	464000	823	20.9	6.48	703	80.5	13.7	297	166.1	11110	3180	369	51.5	37	n
1577	vin4_54	VIN4	2.4	0.1	0.11	0.1902	0.0033	0.0092	0.094	0.0046	0.005	0.10751	0.26746	1122	18	50	1235	29	31	1460	94	1122	50	253.9	333.1	451000	360	25.2	7.4	735	95	13.9	224	66.5	10780	2050	246.7	25.1	28.6	n
1578	vin4_56	VIN4	4.11	0.14	0.15	0.2691	0.0044	0.013	0.1115	0.0035	0.0041	0.26762	0.17551	1536	23	66	1651	27	29	1815	70	1815	70	116.8	193.9	493000	181	31.2	2.9	615	49.2	9.9	177.1	55.9	10580	1589	204.5	25.32	11.02	n
1579	vin4_57	VIN4	1.89	0.15	0.15	0.1899	0.0043	0.0096	0.072	0.0054	0.0056	0.10215	0.1844	1120	23	52	1066	49	49	920	160	1120	52	112.8	75	488000	292	19.7	0.104	40.7	4.56	1.48	160	81.2	10570	1683	56.2	4.43	10.95	n
1580	vin4_59	VIN4	0.934	0.048	0.049	0.1104	0.0015	0.0052	0.0622	0.0032	0.0035	0.12467	0.15428	675.2	8.5	30	664	25	26	610	120	675.2	30	151.2	187.2	477000	154	9.7	1.63	12	10.5	1.4	288.6	113.7	8960	2766	80.9	5.56	9.6	y
1581	vin4_6	VIN4	18.54	0.47	0.52	0.5988	0.007	0.028	0.2243	0.0049	0.0066	0.54841	-0.12372	3024	28	110	3013	25	27	3010	46	3010	46	83.5	148.4	470000	383	4.82	0.123	19.95	2.57	0.727	190.8	99.5	9880	2170	357	90	25.18	y
1582	vin4_61	VIN4	2.1	0.3	0.3	0.184	0.0075	0.011	0.086	0.013	0.013	-0.14221	0.31502	1086	41	61	1110	100	100	1060	310	1086	61	25.39	12.64	477000	235	38.3	0.0159	12.78	1.33	0.86	53.5	37.55	10230	627	9.15	0.86	2.67	y
1583	vin4_62	VIN4	1.26	0.14	0.14	0.1146	0.0029	0.0059	0.0808	0.0087	0.0088	0.34926	-0.1025	699	17	34	807	63	63	990	210	699	34	42.5	61.2	467000	156	57	0.28	13.2	3.83	0.786	92.9	42.8	8690	927	27.6	2.38	3.21	n
1584	vin4_63	VIN4	1.91	0.3	0.3	0.1864	0.0077	0.011	0.076	0.013	0.013	0.082568	0.16004	1099	42	62	1010	120	120	650	370	1099	62	17.05	10.67	494000	328	39	0.0188	16.57	1.77	1.22	88.3	54.4	11010	1000	7.82	0.65	1.73	n
1585	vin4_64	VIN4	1.995	0.075	0.079	0.1848	0.0028	0.0088	0.0785	0.0029	0.0033	0.32798	0.055691	1093	16	48	1108	26	27	1130	82	1093	48	158.3	151	477000	244	12	0.054	32	1.94	0.377	99.7	55.17	12420	1106	110.3	9.58	15.91	y
1586	vin4_65	VIN4	1.193	0.046	0.049	0.1333	0.0018	0.0063	0.0651	0.0025	0.0028	0.17962	0.16199	807	10	36	794	21	22	757	87	807	36	171.9	344.3	467000	184	10.1	1.17	21.7	4.87	0.352	178.5	80.7	11370	1901	181.6	13.07	12.93	y
1587	vin4_67	VIN4	0.976	0.042	0.044	0.1133	0.0017	0.0054	0.0629	0.0026	0.0029	0.44961	-0.13571	691.7	9.6	31	691	22	23	663	97	691.7	31	300.5	410.8	473000	204	5.58	0.0052	13.73	4.07	0.191	270.4	98.4	12440	2693	184.8	12.88	19.54	y
1588	vin4_68	VIN4	4.19	0.13	0.14	0.2689	0.0051	0.013	0.1132	0.0034	0.004	0.3916	0.28058	1534	26	67	1666	25	27	1844	61	1844	61	97.5	423	459000	534	35.8	9.4	1280	149	26.4	307	46.3	12090	2440	447	56.2	11.87	n
1589	vin4_69	VIN4	2.587	0.076	0.083	0.2123	0.0027	0.0099	0.0882	0.0024	0.003	0.40556	0.002603	1241	14	53	1293	21	23	1372	63	1241	53	385.4	301.3	460000	670	38.2	7.3	331	47.4	6.22	97.8	29.22	9270	857	254.5	24.9	42.1	y
1590	vin4_7	VIN4	0.934	0.052	0.054	0.1127	0.0018	0.0054	0.0601	0.0033	0.0035	0.20246	0.049405	688	10	31	663	28	28	540	130	688	31	156.5	214.7	472000	217	5.27	0.172	18.55	4.77	0.201	219	81.2	10320	2138	97.7	6.57	10.53	y
1591	vin4_71	VIN4	2.098	0.076	0.08	0.1328	0.0022	0.0064	0.1143	0.0043	0.0048	0.12487	0.38507	804	13	36	1147	24	26	1854	76	1854	76	491	306	467000	836	54.6	14.42	2063	250.9	46.6	570	159	10000	4850	161.9	20.43	40.2	n
1592	vin4_72	VIN4	1.98	0.1	0.1	0.1912	0.0029	0.0091	0.0741	0.0037	0.004	0.053324	0.26185	1128	15	49	1098	35	36	1000	120	1128	49	54.9	123.4	482000	123	10.3	0.055	32.2	4.4	1.38	186.2	80.9	9060	1928	94.3	7.79	5.23	n
1593	vin4_73	VIN4	1.711	0.059	0.063	0.1345	0.0029	0.0067	0.0919	0.003	0.0035	0.41562	0.18505	813	16	38	1008	22	24	1442	73	813	38	162.9	414	452000	706	36.8	14.3	1910	214	35.8	367	154.5	12680	3200	220.6	22.57	13.09	n
1594	vin4_74	VIN4	5.81	0.3	0.3	0.3035	0.0053	0.015	0.1382	0.0068	0.0073	0.18566	0.15123	1708	26	73	1932	43	45	2159	94	2159	94	62.5	77.6	456000	223	37.1	42.9	82.7	20.1	1.4	38.8	33.9	12190	471	94.2	14.57	13.03	n
1595	vin4_75	VIN4	2.57	0.14	0.14	0.2223	0.0039	0.011	0.0835	0.0043	0.0046	0.15401	0.14102	1294	21	57	1280	38	39	1220	120	1294	57	115.6	86.5	482000	171	7.7	0.0111	31.3	1.24	0.287	55.5	39.5	13070	714	76.9	7.13	14.32	y
1596	vin4_76	VIN4	4.87	0.15	0.16	0.319	0.0046	0.015	0.11	0.0035	0.0042	0.19315	0.26478	1784	23	74	1791	26	28	1779	69	1779	69	109.7	120.3	492000	284	7.79	0.0046	7.82	1.07	0.301	48.8	9.61	13670	426	154.2	18.84	18.36	y
1597	vin4_77	VIN4	9.3	0.18	0.22	0.4324	0.0051	0.02	0.1547	0.0028	0.0041	0.43336	0.18239	2316	23	91	2365	18	22	2392	46	2392	46	114	393.3	483000	355	740	0.65	90	5.24	0.89	89.2	45.5	11640	1014	682	117.4	21.85	y
1598	vin4_79	VIN4	1.933	0.066	0.07	0.1807	0.0025	0.0085	0.0768	0.0023	0.0028	0.40763	0.031236	1071	14	46	1088	22	24	1094	75	1071	46	213.4	338.6	478000	174	11.1	0.633	135.2	9.35	1.61	68.5	34.59	12300	741	246.3	20.86	20.24	y
1599	vin4_8	VIN4	2.145	0.093	0.096	0.1999	0.0028	0.0094	0.0771	0.0031	0.0035	0.16275	0.16591	1175	15	50	1156	30	31	1113	92	1175	50	118	209	466000	216	12	0.9	52	6.5	1.05	69.1	48.8	12720	841	168.7	14.67	13.51	y
1600	vin4_80	VIN4	3.51	0.11	0.12	0.265	0.0034	0.012	0.0956	0.0027	0.0033	0.42683	0.011156	1515	17	63	1529	25	27	1522	67	1522	67	179.8	290	469000	396	12.4	1.74	230	29.2	5.23	168.1	81.3	12260	1710	310.8	33	25.82	y
1601	vin4_81	VIN4	3.52	0.11	0.12	0.2689	0.0035	0.013	0.0938	0.0027	0.0033	0.37194	0.033507	1535	18	64	1526	24	26	1485	67	1535	64	443	214	470000	288	10.9	0.325	105.6	14	4.88	235.9	101	9670	2270	235	24.4	65.2	y
1602	vin4_82	VIN4	1.85	0.11	0.11	0.1695	0.003	0.0082	0.0784	0.0043	0.0045	0.33121	-0.03083	1009	17	45	1052	39	40	1090	130	1009	45	75.4	299.3	459000	390	28.9	1.66	211	21.6	3.63	140.6	39.3	12360	1285	204.2	17.8	5.88	y
1603	vin4_83	VIN4	2.18	0.1	0.1	0.1922	0.0033	0.0093	0.0815	0.0036	0.004	0.27561	0.084505	1133	18	50	1167	32	33	1188	97	1133	50	85.6	104.6	481000	223	12.5	0.32	68	6.16	1.23	79.7	46.97	11490	871	81.9	7.39	8.86	y
1604	vin4_84	VIN4	1.826	0.064	0.068	0.1169	0.0025	0.0058	0.1123	0.0039	0.0045	0.32425	0.29661	712	14	34	1050	23	25	1813	74	1813	74	317.6	471	491000	788	102.6	15.34	3420	311	60.2	673	130.3	12780	5290	222.8	27.9	31.11	n
1605	vin4_86	VIN4	3.55	0.17	0.17	0.2471	0.008	0.014	0.1028	0.0033	0.0039	0.70672	0.06962	1421	42	71	1526	38	39	1663	71	1663	71	165.2	189	476000	331	20.7	2.51	590	58	11.2	266	100.9	9330	2570	185.7	21.22	21.7	n
1606	vin4_87	VIN4	1.52	0.11	0.11	0.1588	0.0031	0.0078	0.0685	0.0049	0.0051	0.15617	0.09805	950	17	43	922	45	46	800	150	950	43	41.4	72.1	475000	339	22.9	0.017	13.26	2.43	1.08	83.5	50.9	9370	924	46.9	3.59	3.72	y
1607	vin4_88	VIN4	2.122	0.08	0.084	0.1913	0.0025	0.009	0.0796	0.003	0.0034	0.13328	0.18951	1128	14	49	1150	26	27	1168	91	1128	49	284	196.1	475000	199	18.1	0.109	45.5	4.5	0.646	118.5	51.2	11690	1180	152.3	13.52	30.3	y
1608	vin4_89	VIN4	0.99	0.062	0.063	0.1127	0.0018	0.0054	0.0622	0.0037	0.0039	0.1467	0.16217	688	11	31	690	31	32	620	140	688	31	128.1	165.2	481000	600	8.6	35	97	59	0.8	111.4	50	10790	1102	75.9	5.29	8.35	y
1609	vin4_9	VIN4	3.61	0.14	0.14	0.2647	0.0044	0.013	0.0991	0.0041	0.0045	-0.03327	0.39816	1513	22	65	1545	30	31	1588	81	1588	81	89	150	490000	117	15.2	1.73	262	24.6	4.01	82.3	32.09	12780	822	160.6	17.75	9.69	y
1610	vin4_90	VIN4	7.03	0.16	0.18	0.3782	0.0044	0.018	0.1336	0.0027	0.0038	0.62393	-0.1759	2067	20	82	2112	20	23	2144	52	2144	52	408.2	503	481000	351	8.3	0.039	9.13	4.45	3.65	378.1	168.5	11010	4290	784	116	85.5	y
1611	vin4_91	VIN4	2.58	0.1	0.11	0.2196	0.003	0.01	0.084	0.0031	0.0036	0.33909	-0.0059646	1279	16	55	1287	29	30	1261	83	1279	55	134.5	176.3	479000	182	9.2	0.123	31.3	3.39	0.81	134.7	69	10830	1425	158.7	14.78	16	y
1612	vin4_93	VIN4	2.75	0.13	0.14	0.222	0.0038	0.011	0.0885	0.004	0.0044	0.40827	-0.066279	1292	20	56	1330	37	38	1346	99	1292	56	115.2	99.5	476000	573	17.2	8.2	221	24.2	2.03	98.9	44.2	9140	997	90.2	8.75	9.56	y
1613	vin4_94	VIN4	2.114	0.075	0.08	0.1938	0.0028	0.0092	0.078	0.0025	0.003	0.38828	-0.027618	1142	15	50	1148	25	26	1121	79	1142	50	157.6	152.4	472000	205	660	0.058	13.15	1.36	0.161	51.9	28.86	11390	576	121.8	10.56	16.97	y
1614	vin4_95	VIN4	8.72	0.22	0.24	0.3739	0.0056	0.018	0.1669	0.0033	0.0047	0.60661	0.046278	2051	25	79	2305	23	26	2519	47	2519	47	152	361	476000	548	37.1	8.05	1364	144	28.4	296	79.5	13240	2420	550	102.1	22.5	n
1615	vin4_96	VIN4	2.124	0.067	0.072	0.167	0.0026	0.008	0.0911	0.0027	0.0033	0.28425	0.19867	995	14	44	1153	22	23	1429	69	995	44	331	399.8	457000	494	24.6	15.11	1122	170.5	23.9	301	63	10100	2460	273.9	27.69	31.9	n
1616	vin4_97	VIN4	1.798	0.05	0.054	0.1511	0.0041	0.008	0.0864	0.0035	0.0039	-0.040628	0.74179	907	23	45	1042	18	20	1308	92	907	45	558	267	462000	857	19.4	9.5	880	133	18.8	386	132	10260	3540	163.3	15.62	43.7	n
1617	vin4_98	VIN4	3.57	0.12	0.13	0.2548	0.0042	0.012	0.0998	0.0035	0.004	0.10787	0.39782	1463	22	63	1537	27	28	1607	76	1607	76	266.5	359.3	452000	500	21.2	15.9	880	170	22.7	468	162	11010	4490	375	41.9	37.3	y
1618	vin4_99	VIN4	5.28	0.17	0.19	0.3328	0.0035	0.015	0.1139	0.0037	0.0043	0.21902	0.057278	1852	17	74	1864	31	33	1851	75	1851	75	74.6	148	485000	51	18	0.202	60.5	8.88	6.65	252.8	56.1	7260	1933	202.1	25.6	11.48	y
